# Supplementary material for: Identification of target genes in neuroinflammation and neurodegeneration after traumatic brain injury in rats
Source: PeerJ journal article supplement (doi:10.7717/peerj.8324), 2019-12-19
Supplement: Supplemental_file_1.zip [file Supplemental_file_1.zip]

## Sheet: 原始数据
Genesymbol	chr	type	start	end	strands	gene_version	gene_source	gene_biotype	MRNA_RID_1_SHM	MRNA_RID_2_SHM	MRNA_RID_3_SHM	MRNA_RID_4_SHM	MRNA_RID_5_SHM	MRNA_RID_6_TRM	MRNA_RID_7_TRM	MRNA_RID_8_TRM	MRNA_RID_9_TRM	MRNA_RID_10_TRM	RatID_1_mRNA	Rat10_trauma_hippo_mrna_FC122_2.bam	Rat2_sham_hippo_mrna_FC120_3.bam	Rat3_sham_hippo_mrna_FC120_5.bam	Rat4_sham_hippo_mrna_FC120_7.bam	Rat5_sham_hippo_mrna_FC122_1.bam	Rat6_trauma_hippo_mrna_FC120_2.bam	Rat7_trauma_hippo_mrna_FC120_4.bam	Rat8_trauma_hippo_mrna_FC120_6.bam	Rat9_trauma_hippo_mrna_FC120_8.bam
Zfyve9	5	gene	132073607	132233186	-	5	ensembl	protein_coding	5.59145	5.84382	5.57734	4.52587	4.67412	5.66256	5.73429	5.67828	5.67367	5.74873	5.58484	5.64355	5.86154	5.54461	4.66426	4.75054	5.67151	5.69308	5.63844	5.65774
Itga1	2	gene	71666606	71823121	-	5	ensembl	protein_coding	0.584301	0.766429	0.468402	-0.613261	-1.00133	1.10387	0.393057	0.610993	0.366664	0.354461	0.618798	0.0541574	0.78468	0.427235	-0.532407	-0.348733	1.05439	0.212133	0.449825	0.313509
Cdc26	5	gene	82373129	82386784	-	3	ensembl	protein_coding	2.73949	3.17507	2.64815	1.68238	1.97434	2.97655	2.96406	2.69553	2.95629	2.78093	2.70673	2.82331	3.20582	2.60326	1.91203	2.0178	3.01342	2.77344	2.81731	2.71966
Olig2	11	gene	34998542	35001918	+	5	ensembl	protein_coding	4.96072	5.08666	5.17546	4.07953	3.945	5.53087	5.35282	5.26904	5.48237	5.62874	4.90693	5.55646	5.01961	5.15062	4.21821	4.01492	5.58628	5.31104	5.22311	5.52403
Trpc3	2	gene	142945396	143011755	-	6	ensembl	protein_coding	2.08933	2.27806	1.78187	1.3015	1.26839	1.94022	2.3304	2.10198	1.86579	2.36576	2.18023	2.23133	2.2618	1.70346	1.43044	1.60889	1.87932	2.31878	1.99422	1.71484
Pus1	12	gene	53675526	53684279	+	3	ensembl	protein_coding	4.21738	4.07936	4.21509	2.93934	3.07047	4.00701	4.21485	4.39455	4.29484	4.45724	4.21593	4.37916	4.02129	4.22303	3.09212	3.13619	3.97823	4.17756	4.37541	4.29122
Mtss1l	19	gene	51731405	51745922	-	4	ensembl	protein_coding	7.31994	7.04719	7.44401	5.89987	6.06111	7.48186	7.75738	7.39861	7.33235	7.58736	7.33163	7.47858	6.89228	7.5106	5.95272	6.10317	7.47503	7.84346	7.41598	7.32624
Smn1	2	gene	49519267	49530314	+	6	ensembl_havana	protein_coding	3.15901	3.41181	3.35667	2.59759	2.63421	3.42892	3.50367	3.68003	3.32784	3.71313	3.12808	3.65383	3.3474	3.35647	2.77082	2.71112	3.43956	3.42564	3.70385	3.2761
RGD1359334	2	gene	215908769	215912361	-	4	ensembl	protein_coding	-4.21446	-3.11145	-6.37188	-6.37188	-4.23804	-6.37188	-6.37188	-4.13765	-6.37188	-4.15158	-4.94933	-3.64248	-2.93974	-7.16425	-7.16425	-4.78779	-4.91901	-7.16425	-4.0846	-4.89688
Psmd6	15	gene	16438805	16447424	+	4	ensembl	protein_coding	6.2225	6.38596	6.02353	5.14754	5.08045	6.20408	6.18801	6.21393	6.19213	6.47989	6.2394	6.40966	6.39413	5.99061	5.29187	5.1374	6.21639	6.10936	6.17897	6.17023
Echdc3	17	gene	77668725	77675477	+	1	ensembl	protein_coding	-1.582	-1.40322	-0.947918	-2.29771	-2.06129	-0.94807	-0.419291	-0.668615	-0.893813	-0.618724	-1.79386	-0.466884	-1.30356	-0.93417	-1.96993	-2.00929	-0.717032	-0.370955	-1.02468	-1.25029
Eif2b2	6	gene	116505786	116512219	-	3	ensembl	protein_coding	5.15014	5.06533	5.1116	4.10569	4.22626	5.06917	5.38348	5.38731	5.31929	5.49673	5.1456	5.42314	4.99943	5.10478	4.2362	4.31123	5.04162	5.34894	5.37788	5.32617
Mrap	11	gene	34516208	34526700	+	4	ensembl	protein_coding	-2.85489	-3.41239	-2.74106	-4.55515	-6.61425	-4.46874	-4.46398	-3.62502	-4.42328	-2.78204	-2.8169	-2.85834	-3.46354	-2.69321	-4.38973	-6.85877	-4.55599	-4.60507	-3.16595	-4.53329
Cyb5b	19	gene	50221836	50255693	+	5	ensembl	protein_coding	5.76443	5.98451	5.64899	4.65248	4.74099	5.8373	5.90976	5.78556	5.69156	5.83192	5.78012	5.71428	5.98616	5.64685	4.74651	4.8086	5.88273	5.88958	5.757	5.63566
Lrch4	12	gene	24144769	24155758	-	5	ensembl	protein_coding	3.33978	3.25603	3.53931	2.0554	2.41853	3.55167	3.89827	3.39067	3.65272	3.7272	3.34741	3.61879	3.17639	3.54288	2.12681	2.50184	3.55561	3.94379	3.35343	3.66264
Tbx6	1	gene	205194665	205198574	+	6	ensembl	protein_coding	-1.69264	-2.26877	-0.940472	-2.65013	-2.09197	-2.03188	-2.02618	-1.60157	-2.85496	-1.20223	-1.85449	-1.37055	-2.38853	-0.808513	-2.76144	-2.0105	-2.39178	-2.23419	-1.17664	-2.36417
Cyp4f6	7	gene	15357407	15384091	-	4	ensembl	protein_coding	2.53251	2.46914	2.80328	1.12447	1.45164	2.65943	2.84196	2.51408	2.4925	2.8383	2.52173	2.73469	2.46842	2.91111	1.22861	1.46098	2.67478	2.81885	2.40993	2.49821
Begain	6	gene	142107881	142129457	-	6	ensembl	protein_coding	6.7504	6.49079	6.76528	5.41672	5.61252	6.61987	6.8375	6.88577	6.82957	7.02011	6.75384	6.95302	6.38599	6.77961	5.53912	5.69939	6.58877	6.85325	6.8693	6.80625
Prlhr	1	gene	289097316	289099003	-	3	ensembl	protein_coding	-0.0550156	-0.454066	0.975648	-1.37316	-0.302547	1.42571	1.6207	0.949767	0.867569	1.70104	-0.338161	1.72172	-0.283079	0.939249	-1.43876	-0.0139872	1.52076	1.6387	0.735042	0.874137
Atf7	7	gene	141928320	142016018	-	4	ensembl	protein_coding	2.09562	2.56763	2.46505	1.26006	1.43254	2.75418	2.84347	2.14362	2.39078	2.39618	2.09229	2.24237	2.54879	2.44675	1.41558	1.49852	2.82412	2.85947	1.99153	2.42971
Cib2	8	gene	57704422	57720624	-	6	ensembl	protein_coding	3.98404	3.67046	3.58151	2.52671	2.59518	3.54623	3.56386	3.69124	3.65357	4.09145	4.1661	3.89271	3.54608	3.67654	2.73153	2.62	3.46528	3.52415	3.66726	3.61461
Upk1b	11	gene	67555643	67586433	-	5	ensembl	protein_coding	-6.24572	-6.24572	-3.98369	-6.24572	-6.24572	-6.24572	-6.24572	-2.68628	-6.24572	-6.24572	-7.32252	-4.32935	-7.32252	-4.17811	-7.32252	-4.9546	-5.08535	-7.32252	-3.7349	-5.06329
Mcm3	9	gene	25770288	25788415	-	6	ensembl	protein_coding	0.364127	0.156736	0.32773	-0.838653	-0.794552	0.714931	0.880054	0.380928	0.0783995	1.03585	0.38989	0.998003	0.0764253	0.286515	-0.781513	-0.643862	0.67089	0.946035	0.279377	0.0837925
Klhdc8b	8	gene	116576640	116581366	-	1	ensembl	protein_coding	3.70799	4.41138	4.69071	3.33488	3.75244	4.25678	4.81492	4.69422	4.63323	4.73766	3.56183	4.65668	4.34584	4.75542	3.46952	3.88973	4.2222	4.78883	4.67409	4.67008
Npr2	5	gene	63653695	63672094	+	6	ensembl	protein_coding	3.88493	4.24886	4.4296	3.08449	3.29664	4.35462	4.48658	4.3772	4.07327	4.29321	3.79479	4.16919	4.20988	4.47453	3.2513	3.37017	4.38396	4.49629	4.34266	4.03662
Gtf2h3	12	gene	39298571	39315037	-	5	ensembl	protein_coding	3.84303	4.04832	3.8025	2.83994	2.90314	3.90882	4.12927	4.10876	3.88625	4.17557	3.82836	4.10427	4.04482	3.76362	2.95682	2.98151	3.89548	4.09138	4.12273	3.85662
Ndufs1	9	gene	69728736	69762079	-	5	ensembl	protein_coding	6.71945	6.92741	6.52182	5.48073	5.53647	6.6453	6.67964	6.67814	6.55528	6.75208	6.74357	6.65697	6.94793	6.49729	5.61975	5.60046	6.65655	6.61685	6.6429	6.51404
RGD1309808	7	gene	118709584	118715951	+	1	ensembl	protein_coding	-3.27188	-5.26887	-5.26887	-2.59321	-5.26887	-1.69549	-2.4972	-1.98304	-2.45457	-3.21368	-3.84686	-2.28791	-3.52132	-3.42688	-3.5877	-5.9616	-1.88934	-2.64521	-2.57332	-3.77555
Jmjd6	10	gene	105440306	105446356	-	6	ensembl	protein_coding	3.05542	3.14405	3.20234	2.02184	2.46042	3.10353	3.36188	3.47744	2.95873	3.41931	3.0284	3.34046	3.11556	3.19545	2.15887	2.56586	3.08961	3.35351	3.45043	2.90683
Nkap	X	gene	123887440	123907038	+	4	ensembl	protein_coding	2.69136	2.90431	2.86719	1.65083	1.77804	3.18056	2.91211	2.96481	2.84444	3.16428	2.71828	3.12781	2.81492	2.87354	1.78453	1.85894	3.27996	2.78637	2.91553	2.79807
Fgl2	4	gene	10315675	10321309	-	5	ensembl	protein_coding	1.01768	1.16698	1.77391	-0.292595	0.237804	2.18619	1.8538	1.48459	1.41024	1.70336	0.902871	1.66905	1.08721	1.77368	-0.178213	0.436348	2.30496	1.82374	1.37879	1.34351
Wsb1	10	gene	65046088	65062151	+	6	ensembl	protein_coding	3.87756	4.07299	4.75171	2.81951	3.4622	4.86525	4.32661	4.23516	4.45487	4.65827	3.85499	4.61503	4.05887	4.78427	2.91622	3.60216	4.87144	4.26209	4.18587	4.37321
Dact3	1	gene	80048066	80059888	+	1	ensembl	protein_coding	7.36487	7.09478	7.22081	5.88945	6.31377	7.16198	7.47899	7.40533	7.41266	7.48035	7.37349	7.38529	7.03159	7.23528	5.98359	6.40371	7.13228	7.45854	7.3934	7.42581
Sp1	7	gene	141806042	141836498	+	6	ensembl	protein_coding	3.41346	3.88338	3.8414	2.54657	2.74676	4.17245	3.79936	3.73939	3.63916	3.87784	3.36078	3.77162	3.8715	3.88269	2.68788	2.79126	4.2478	3.76144	3.70511	3.57969
Kifap3	13	gene	86953394	87089644	+	6	ensembl	protein_coding	7.78251	7.85451	7.58696	6.57903	6.58005	7.59374	7.59468	7.71751	7.64604	7.86818	7.8063	7.76978	7.88436	7.5761	6.72927	6.63305	7.57831	7.52307	7.67692	7.62605
Kcnj10	13	gene	95245046	95274535	+	4	ensembl	protein_coding	5.41649	5.21164	5.21541	4.04795	4.0429	5.59624	5.80976	5.45025	5.25597	5.30587	5.41351	5.18751	5.19607	5.1799	4.17523	4.14325	5.61769	5.81486	5.41844	5.20603
Slc37a4	8	gene	47335910	47341992	+	4	ensembl	protein_coding	3.73674	4.03728	4.08351	2.78156	2.90979	3.93932	4.09278	4.01808	3.91471	4.08339	3.72327	3.98843	4.02943	4.13157	2.91065	2.98005	3.92231	4.05475	3.97499	3.8817
LOC498308	13	gene	113064717	113080859	-	1	ensembl	protein_coding	-6.22657	-6.22657	-6.22657	-6.22657	-6.22657	-6.22657	-6.22657	-6.22657	-3.86551	-6.22657	-5.21979	-7.29142	-4.99301	-5.12418	-5.03982	-7.29142	-5.19144	-7.29142	-7.29142	-5.17073
Arid5a	9	gene	42534321	42538959	+	6	ensembl	protein_coding	2.67217	2.6778	2.95621	1.56355	1.72897	2.85314	3.18434	3.08459	3.0354	3.44378	2.65972	3.38976	2.62207	2.97023	1.7127	1.75568	2.85858	3.13648	3.06971	3.02502
Mcemp1	12	gene	4375803	4379100	+	4	ensembl	protein_coding	-5.61713	-5.61713	-5.61713	-5.61713	-5.61713	-5.61713	-5.61713	-5.61713	-3.28743	-5.61713	-3.81411	-4.98701	-5.50561	-4.84299	-7.83725	-5.5824	-4.91885	-5.75231	-4.91519	-5.6859
Rfxap	2	gene	163630968	163635150	-	2	ensembl	protein_coding	4.19592	4.37385	4.47511	3.36992	3.64469	4.65857	4.81836	4.70997	4.31986	4.73055	4.15413	4.66246	4.30499	4.47427	3.4788	3.74562	4.68464	4.8369	4.69552	4.25946
Cdk19	20	gene	47178053	47318293	+	6	ensembl	protein_coding	5.61153	6.26579	6.03511	4.87804	5.22316	6.10765	6.30195	6.1358	5.94915	6.05269	5.54464	5.91783	6.26746	6.04063	5.00166	5.34649	6.13426	6.28787	6.11144	5.90858
Pnkp	1	gene	101918528	101923538	+	6	ensembl	protein_coding	3.52991	3.50891	3.80734	2.62412	2.69062	3.54653	3.84192	3.87202	3.78862	4.01599	3.52071	3.92138	3.42373	3.86352	2.76657	2.76653	3.54063	3.80277	3.85222	3.76793
Aplnr	3	gene	79052120	79055764	+	4	ensembl	protein_coding	1.06297	1.81941	1.38065	0.135595	0.704562	2.71462	1.95422	1.41202	1.84835	1.84519	0.638466	1.74315	1.71489	1.29512	0.207557	0.706713	3.24	2.31292	0.971173	2.0476
Trmt13	2	gene	237588550	237601699	+	5	ensembl	protein_coding	0.427708	0.443746	0.714833	-0.851846	-0.437893	0.875196	0.82908	0.648795	0.645204	0.714845	0.545834	0.389366	0.61459	0.745588	-0.535973	-0.167676	0.590282	0.467664	0.542959	0.817036
Lmtk2	12	gene	14461531	14592856	-	5	ensembl	protein_coding	7.10072	6.93379	6.74816	5.75726	5.8252	6.74902	7.0665	6.93295	6.84719	6.97097	7.16783	6.83329	6.94233	6.70758	5.90678	5.87885	6.73755	7.0543	6.91246	6.79077
Grb14	3	gene	57578232	57695025	-	4	ensembl	protein_coding	3.93645	4.21783	4.18149	2.94803	3.18137	4.37506	4.34028	4.12972	4.15224	4.67553	3.89514	4.6444	4.18627	4.19263	3.04425	3.28294	4.43407	4.291	4.03897	4.12831
Plcl2	9	gene	1740384	1972816	-	6	ensembl	protein_coding	5.14454	5.13826	4.94732	3.9816	4.17954	5.23464	5.33476	5.15926	5.12672	5.46545	5.15117	5.40723	5.10812	4.94193	4.08247	4.22581	5.2723	5.28207	5.11967	5.12135
Zfp777	4	gene	142354004	142376510	-	2	ensembl	protein_coding	4.70433	4.54534	4.74802	3.62208	3.43873	4.51479	4.90872	4.8155	4.69539	5.00599	4.69459	4.94587	4.51499	4.75274	3.76465	3.47812	4.49205	4.88295	4.7878	4.68514
LOC367975	X	gene	124243099	124248301	-	1	ensembl	protein_coding	-1.26361	-0.577474	-0.762553	-1.58639	-3.03476	-0.30086	-0.295554	-0.967879	-0.364488	-2.95756	-1.73502	-1.63708	-0.71886	-0.824268	-1.88914	-2.15102	-0.609023	-0.815053	-0.366209	-1.36547
Hemgn	5	gene	66517088	66529462	-	4	ensembl	protein_coding	-3.99555	-2.0311	-1.50479	-3.072	-2.3461	-2.72695	-2.82929	-2.3747	-1.44236	-2.15335	-1.59456	-1.63051	-2.59746	-1.14021	-4.82989	-1.42537	-2.03566	-2.83366	-1.55894	-4.82989
Memo1	6	gene	32248023	32295274	+	5	ensembl	protein_coding	3.54062	3.41682	3.25912	2.18577	2.47001	3.27606	3.39524	3.32983	3.47576	3.69602	3.58661	3.62066	3.46167	3.24105	2.33227	2.5292	3.29325	3.29439	3.25128	3.43487
Ccdc166	7	gene	117026724	117027308	-	1	ensembl	protein_coding	-3.68058	-4.17894	-2.05558	-3.74469	-3.23172	-2.13657	-2.82312	-2.77354	-2.27641	-3.13713	-3.72432	-2.4608	-2.85329	-2.28285	-4.41723	-2.9539	-2.3764	-3.17953	-2.69915	-3.09082
Ppcs	5	gene	142276594	142279846	-	5	ensembl	protein_coding	3.3165	3.09168	3.21604	2.4248	2.09462	3.00016	3.41948	3.26694	3.2231	3.75538	3.32103	3.70166	3.03501	3.28785	2.59077	2.16591	2.92094	3.3718	3.21697	3.19676
Sesn3	8	gene	12768653	12818203	+	5	ensembl	protein_coding	3.68859	3.99517	4.26444	2.89668	3.09671	4.43177	4.49164	3.93603	3.84502	3.92264	3.63067	3.75941	3.97024	4.30442	3.04995	3.21762	4.50852	4.50292	3.8445	3.78044
Ensa	2	gene	217239506	217246826	+	1	ensembl	protein_coding	6.56547	6.62474	6.16827	5.26827	5.30785	6.40833	6.54056	6.47988	6.30355	6.59324	6.51783	6.78497	6.47762	6.1805	5.42696	5.55357	6.15848	6.33893	6.46098	6.36033
Slc32a1	3	gene	160500060	160504727	-	6	ensembl	protein_coding	6.01204	5.44382	5.56644	4.87057	4.77287	5.15089	5.73057	5.98742	5.24256	5.90337	6.07904	5.82136	5.37724	5.55363	5.06059	4.88569	5.0775	5.68997	5.98929	5.14626
Exosc9	2	gene	142879824	142890726	+	6	ensembl	protein_coding	3.56336	3.80288	3.664	2.5089	2.77329	3.54227	3.64185	3.8217	3.72622	4.0416	3.52686	3.97047	3.78946	3.70789	2.64223	2.84958	3.53284	3.57233	3.78674	3.70767
Aste1	8	gene	113322528	113333049	+	5	ensembl	protein_coding	0.684872	1.2139	0.983198	-0.351507	-0.0055275	0.684543	1.13734	0.639082	0.772227	1.17376	0.751175	1.18777	1.26731	0.836126	-0.423859	0.297679	0.657375	0.965816	0.822464	0.57004
Smim14	14	gene	44233124	44276792	+	4	ensembl	protein_coding	5.23846	5.30667	5.18197	4.04117	4.19081	5.33616	5.33738	5.37168	5.28936	5.54846	5.20785	5.46954	5.28113	5.17371	4.17287	4.28497	5.36222	5.28903	5.31728	5.28351
Aqr	3	gene	112143851	112213881	-	6	ensembl	protein_coding	5.09232	5.29502	5.0422	4.03865	4.04993	5.23026	5.14698	5.13217	5.09341	5.25319	5.10136	5.14681	5.30129	5.03637	4.17292	4.11168	5.26437	5.08757	5.08464	5.06713
Prkrir	1	gene	169866610	169882330	+	6	ensembl	protein_coding	4.41801	4.44649	4.31607	3.10779	3.3611	4.49637	4.52349	4.27372	4.22291	4.75775	4.43451	4.6809	4.42439	4.31811	3.23171	3.42566	4.53541	4.48783	4.20466	4.1805
Dedd	13	gene	94345399	94348787	+	2	ensembl	protein_coding	4.31583	4.34435	4.07655	2.97374	3.1089	4.1327	4.34756	4.31554	4.24867	4.61897	4.369	4.54158	4.31095	4.07223	3.06469	3.17348	4.09799	4.34983	4.27777	4.22532
Vom2r54	7	gene	17115313	17124109	+	4	ensembl	protein_coding	-6.35196	-6.35196	-3.99166	-6.35196	-6.35196	-6.35196	-4.06104	-6.35196	-6.35196	-6.35196	-4.29997	-7.18001	-7.18001	-7.18001	-7.18001	-7.18001	-5.05428	-4.31853	-5.05101	-4.24458
Fga	2	gene	201316925	201454615	+	6	ensembl	protein_coding	-2.02864	-2.83589	-3.78203	-5.90684	-5.90684	-1.99782	-5.90684	-5.90684	-5.90684	-3.81557	-2.64553	-3.52047	-3.58715	-3.76293	-5.1594	-5.1933	-3.10773	-5.38986	-7.80182	-3.82594
Cdadc1	15	gene	43686834	43715716	-	6	ensembl	protein_coding	4.05811	4.10307	3.87288	2.72292	3.43469	4.33188	4.05005	4.18997	4.1338	4.47953	3.95031	4.42793	4.09468	4.00481	2.85606	3.42127	4.24348	4.11519	4.20637	4.0568
Use1	16	gene	19623234	19625901	+	6	ensembl	protein_coding	5.45142	5.57723	5.63129	4.51481	4.61645	5.68111	5.83521	5.76414	5.80831	6.14599	5.41674	6.10131	5.54556	5.62251	4.63778	4.69016	5.66957	5.78921	5.72785	5.82527
Defb44	15	gene	50002354	50003416	+	1	ensembl	protein_coding	-6.81374	-6.81374	-6.81374	-6.81374	-6.81374	-6.81374	-6.81374	-6.81374	-6.81374	-6.81374	-6.81374	-6.81374	-6.81374	-6.81374	-6.81374	-6.81374	-6.81374	-6.81374	-6.81374	-6.81374
Cdh2	18	gene	7997533	8212372	-	5	ensembl	protein_coding	6.51169	6.66003	6.5921	5.4306	5.59927	6.71745	6.75028	6.65669	6.54534	6.67579	6.51275	6.56622	6.6298	6.59015	5.55939	5.66949	6.74776	6.73627	6.61329	6.5141
Armcx3	X	gene	105463207	105466731	+	5	ensembl	protein_coding	6.09997	6.15708	5.94943	4.81355	4.9154	6.05422	5.99817	6.04518	6.10078	6.30447	6.11802	6.23167	6.1297	5.94997	4.91967	4.98328	6.06719	5.94666	5.99931	6.09279
Ino80	3	gene	117738630	117817221	-	7	ensembl	protein_coding	3.61192	3.74794	3.76927	2.58524	2.80316	3.84746	3.88884	3.7019	3.68905	3.95074	3.69182	3.76922	3.85291	3.78811	2.55301	2.83619	3.97211	3.86353	3.68845	3.58018
Pcdhga3	18	gene	30514378	30516962	+	2	ensembl	protein_coding	3.74725	3.88508	3.98733	2.7244	2.95553	3.94454	4.26271	4.08748	3.92751	4.23561	3.39657	3.83013	3.91041	4.14671	2.64703	3.43767	4.04383	4.7713	3.82478	3.74899
Olr1347	9	gene	99400125	99401096	+	1	ensembl	protein_coding	-6.46701	-6.46701	-4.08678	-6.46701	-6.46701	-6.46701	-6.46701	-6.46701	-6.46701	-6.46701	-5.01259	-7.09074	-7.09074	-4.91667	-4.83205	-7.09074	-4.98414	-7.09074	-7.09074	-7.09074
Adamts19	18	gene	53154607	53337093	+	5	ensembl	protein_coding	-1.24975	-0.787219	-0.289412	-1.85094	-0.899494	-0.456126	-0.725825	-0.315532	-1.16144	-0.794763	-1.03382	-0.420973	-0.976853	-0.34658	-2.02604	-0.830195	-0.720865	-0.720914	-0.240959	-1.21331
Aldob	5	gene	69297012	69313010	-	6	ensembl	protein_coding	-1.23779	-2.19765	-1.88768	-2.56693	-2.02645	-1.77582	-1.60269	-1.14885	-0.67513	-1.9279	-1.13806	-1.95755	-2.47474	-1.77581	-2.26712	-1.87554	-1.31477	-1.93542	-1.43166	-0.876231
Olr1294	15	gene	39431619	39432563	+	1	ensembl	protein_coding	-6.35144	-6.35144	-6.35144	-6.35144	-6.35144	-6.35144	-6.35144	-6.35144	-6.35144	-6.35144	-5.23671	-7.12989	-7.12989	-7.12989	-7.12989	-5.09863	-7.12989	-7.12989	-5.20784	-5.19187
Ebf1	10	gene	23523672	23911514	+	4	ensembl_havana	protein_coding	-1.75924	-1.43759	-0.906379	-2.90264	-1.87199	-0.735612	-0.809738	-1.51316	-1.31459	-0.382702	-0.91076	-0.954484	-1.59844	-0.780495	-1.65909	-1.69669	-2.80209	-0.121046	-1.85372	-1.25682
Far1	1	gene	185319727	185379623	+	7	ensembl_havana	protein_coding	3.46892	3.49035	3.57057	1.87285	2.18629	3.58796	3.13283	3.26603	3.23775	3.42643	3.52957	3.31113	3.4695	3.63089	1.94258	2.33329	3.64571	3.03268	3.13893	3.20569
RGD1565212	15	gene	51081452	51098325	-	4	ensembl	protein_coding	-6.27336	-6.27336	-6.27336	-6.27336	-6.27336	-6.27336	-6.27336	-6.27336	-6.27336	-6.27336	-7.18328	-4.61568	-7.18328	-5.20272	-7.18328	-7.18328	-4.55427	-7.18328	-5.26123	-7.18328
Lce1l	2	gene	211706100	211707433	+	1	ensembl	protein_coding	-6.68264	-4.26049	-6.68264	-6.68264	-6.68264	-6.68264	-4.50095	-6.68264	-6.68264	-6.68264	-4.68683	-6.91259	-4.44318	-6.91259	-6.91259	-6.91259	-6.91259	-4.70445	-6.91259	-6.91259
Olr307	1	gene	176504648	176505580	+	1	ensembl	protein_coding	-6.69784	-6.69784	-6.69784	-6.69784	-6.69784	-4.46217	-6.69784	-6.69784	-6.69784	-6.69784	-6.90415	-4.78597	-6.90415	-6.90415	-6.90415	-6.90415	-4.72355	-6.90415	-6.90415	-6.90415
Ahcyl1	2	gene	229905782	229920833	-	6	ensembl	protein_coding	7.48976	7.64078	7.42069	6.47089	6.38722	7.58524	7.65794	7.55342	7.37459	7.71363	7.4998	7.62441	7.63781	7.41499	6.62121	6.43299	7.60069	7.62744	7.5109	7.32391
N4bp3	10	gene	36864136	36866601	-	1	ensembl	protein_coding	1.50466	0.69256	0.632039	-0.498095	0.186751	1.6579	1.47844	1.48643	0.602817	1.70019	1.26053	1.65196	0.513371	0.975693	-0.295529	0.555113	1.51609	1.61558	1.58605	0.0648448
Adrb3	16	gene	68673983	68676747	+	5	ensembl	protein_coding	-0.649196	-0.496756	0.0987434	-0.965299	-1.62326	-0.411444	-0.0723481	-0.899607	-1.36534	-0.653188	-0.546288	-0.742001	-0.813171	-0.0287943	-0.596265	-0.921459	-0.504287	-0.194363	-0.995011	-1.69605
Anapc4	14	gene	60589356	60621597	-	4	ensembl	protein_coding	4.78346	4.87497	4.69004	3.59663	3.611	4.74643	4.69446	4.77282	4.70098	4.88434	4.79599	4.7841	4.86573	4.71442	3.73009	3.66636	4.76474	4.63618	4.72958	4.66793
LOC317165	18	gene	40500379	40517959	+	2	ensembl	protein_coding	1.90459	1.92343	2.16119	0.909606	1.06575	2.07517	1.9582	2.12199	1.97947	1.90671	2.1597	2.05827	2.3065	1.83034	1.34688	0.764607	2.1041	1.71118	1.89701	1.82753
Nr4a1	7	gene	140713176	140721070	+	3	ensembl	protein_coding	4.29267	3.79601	4.52599	3.11617	3.42303	4.66502	4.60472	4.69709	4.75405	5.45416	4.25738	5.46789	3.64313	4.53742	3.24036	3.52804	4.67494	4.53799	4.6816	4.76017
Mtmr14	4	gene	208492229	208535256	+	6	ensembl	protein_coding	4.00438	3.97911	4.00186	2.99656	3.18066	4.06648	4.19985	4.20756	3.87278	4.36081	3.99892	4.28802	3.95295	4.01285	3.14085	3.24398	4.0702	4.1284	4.19143	3.84245
RT1-CE7	20	gene	6718907	6779286	-	5	ensembl	protein_coding	4.11651	3.48592	4.1551	3.10101	2.63291	4.38469	4.6133	4.12296	4.21783	4.53192	3.83319	4.67863	3.51156	4.47092	2.86487	2.68062	4.33823	4.5822	4.28585	4.11609
Dctd	16	gene	46903570	46933233	-	7	ensembl	protein_coding	2.27022	2.45922	2.59959	1.07993	0.988426	2.46874	2.7539	2.56257	2.58197	2.60327	2.24132	2.57427	2.3326	2.63613	1.21116	1.11869	2.38878	2.70723	2.41384	2.74382
Irx2	1	gene	34682802	34688217	-	6	ensembl	protein_coding	-4.74544	-1.85025	-2.02118	-4.74544	-2.85064	-2.80542	-2.80112	-4.74544	-1.01119	-4.74544	-2.43856	-3.79747	-2.06841	-2.74904	-4.63702	-3.99506	-3.49632	-2.68426	-3.49104	-2.96437
Olr1118	8	gene	17935048	17936013	-	1	ensembl	protein_coding	-6.43117	-6.43117	-6.43117	-6.43117	-4.13668	-6.43117	-6.43117	-6.43117	-6.43117	-6.43117	-5.0696	-5.10085	-7.1081	-7.1081	-7.1081	-4.92093	-4.27729	-7.1081	-7.1081	-7.1081
Olr157	1	gene	176553596	176554989	+	3	ensembl	protein_coding	-6.57549	-6.57549	-6.57549	-6.57549	-6.57549	-6.57549	-6.57549	-6.57549	-6.57549	-6.57549	-6.97667	-6.97667	-6.97667	-4.9961	-6.97667	-4.94541	-6.97667	-6.97667	-6.97667	-6.97667
Snhg11	3	gene	160736978	160743135	-	3	ensembl	protein_coding	5.68753	5.45528	5.91563	4.30461	4.7582	5.36442	5.58684	5.5392	5.58369	5.75031	5.70765	5.64742	5.36915	6.00172	4.42418	4.90088	5.31212	5.53247	5.45819	5.59193
Phactr1	17	gene	25210472	25713154	+	6	ensembl	protein_coding	6.71603	6.82615	6.75998	5.78471	5.8116	6.71569	7.14755	6.92805	6.81545	7.02699	6.70096	6.946	6.76432	6.75482	5.91148	5.91945	6.66737	7.14892	6.89537	6.8235
Adora1	13	gene	56097928	56131500	-	2	ensembl	protein_coding	6.95006	6.9149	6.86989	5.62605	5.92091	7.04498	7.27892	7.19381	6.95287	7.14937	6.97962	7.0716	6.88128	6.8566	5.74852	5.96453	7.15692	7.15769	7.14886	6.93612
Cacul1	1	gene	289157890	289215140	-	6	ensembl	protein_coding	4.43838	4.53868	4.34647	3.15379	3.39854	4.57389	4.56836	4.44775	4.39572	4.57793	4.4485	4.51309	4.52067	4.33778	3.27643	3.46157	4.56875	4.51823	4.4225	4.37199
Arl11	15	gene	45448923	45451069	+	3	ensembl	protein_coding	0.959453	0.920116	1.5445	0.316432	-0.0790629	2.31161	2.31745	1.43025	2.02034	2.03061	0.871392	1.90345	0.930845	1.55132	0.394256	-0.0328637	2.3722	2.37628	1.38605	2.01878
Mir1188	6	gene	142895748	142895829	+	2	ensembl	miRNA	-3.32305	-6.19656	-2.7245	-4.16001	-6.19656	-4.07455	-6.19656	-2.7487	-2.75225	-4.04002	-2.67405	-3.68067	-7.35277	-3.11793	-4.84266	-4.87487	-5.01169	-5.06158	-2.22057	-3.57598
Arl13a	X	gene	104847578	104871493	+	5	ensembl	protein_coding	-6.7852	-6.7852	-6.7852	-6.7852	-6.7852	-6.7852	-4.64659	-6.7852	-6.7852	-3.82727	-6.81331	-3.70753	-6.81331	-6.81331	-6.81331	-6.81331	-6.81331	-4.54144	-6.81331	-6.81331
Sparc	10	gene	40573518	40595276	-	6	ensembl	protein_coding	8.69389	8.51885	8.54406	7.23645	7.24862	8.71784	9.04175	8.52813	8.69995	8.91427	8.70766	8.83858	8.46533	8.55108	7.35722	7.28315	8.7409	9.055	8.4635	8.68139
Folr2	1	gene	173104848	173110514	-	5	ensembl	protein_coding	-2.06031	-1.21883	-0.754047	-1.93472	-2.95699	-0.396406	-0.522415	-1.18584	-1.31385	-0.556757	-2.18048	-0.322384	-1.51539	-0.855821	-1.93931	-2.77105	-0.295892	-0.418075	-1.48777	-1.11399
Ppp1r7	9	gene	100146206	100160432	+	6	ensembl	protein_coding	6.05255	6.14526	5.92633	4.7858	4.91532	6.07746	6.01138	6.04957	6.06972	6.23333	6.15571	6.13917	6.13434	5.8935	4.96685	4.89628	6.06678	5.97702	5.99336	6.04372
Psmb4	2	gene	215536872	215539684	-	4	ensembl	protein_coding	6.66017	6.74511	6.68404	5.57424	5.44953	6.57054	6.77026	6.76548	6.74085	6.97536	6.63121	6.9273	6.70213	6.68667	5.66013	5.52924	6.56564	6.75528	6.76404	6.71396
Wdr82	8	gene	114230823	114248017	+	2	ensembl_havana	protein_coding	5.55335	5.81559	5.5151	4.55046	4.62496	5.6527	5.77452	5.724	5.47935	5.69049	5.63156	5.32551	5.94601	5.52587	4.58137	4.75948	5.54221	5.82974	5.76935	5.46943
Zscan21	12	gene	21321340	21335678	+	2	ensembl	protein_coding	3.45392	3.52139	3.31927	1.98037	2.25128	3.549	3.29816	3.40104	3.37473	3.69375	3.49605	3.62976	3.52755	3.29511	2.08547	2.35916	3.55135	3.18165	3.35858	3.35823
S100a1	2	gene	209331131	209333683	-	4	ensembl	protein_coding	3.14908	3.58533	3.71703	2.17192	2.25129	3.88825	3.98603	3.48046	3.70432	4.15496	3.10958	4.15764	3.60084	3.71192	2.35837	2.33656	3.86104	3.91576	3.37394	3.663
Cngb3	5	gene	37999121	38158576	+	5	ensembl	protein_coding	-6.0671	-6.0671	-6.0671	-6.0671	-6.0671	-6.0671	-6.0671	-6.0671	-6.0671	-6.0671	-4.72425	-7.32434	-5.22391	-5.34378	-7.32434	-5.29308	-7.32434	-7.32434	-5.40229	-5.38632
T2	1	gene	54159582	54212462	-	5	ensembl	protein_coding	-0.81981	-0.113177	0.262919	-0.893833	-1.25658	0.260071	-0.00130037	-0.561605	-0.822138	0.491463	-0.987928	0.367187	0.0214938	0.471797	-0.744587	-1.32278	0.379578	-0.253669	-0.551728	-0.83335
Il17ra	4	gene	220083472	220106001	+	6	ensembl	protein_coding	3.92761	3.88056	4.02653	2.81862	2.9632	4.24081	4.39572	4.03617	4.05816	4.32699	3.92241	4.236	3.80047	4.02781	2.92791	3.04472	4.27038	4.40558	3.99534	4.04375
LOC500124	4	gene	145013636	145038535	-	4	ensembl	protein_coding	0.744465	0.375687	0.750502	-0.802718	-0.757787	0.804348	0.756203	0.664439	0.778271	1.02066	0.693401	0.948335	0.230647	0.886283	-0.708539	-0.842331	0.931015	0.729451	0.644307	0.821502
Ugdh	14	gene	44299226	44322226	+	3	ensembl	protein_coding	3.25517	3.13574	3.14097	1.97537	1.91111	3.27859	3.36524	3.01254	3.17077	3.34833	3.27638	3.27141	3.10035	3.1445	2.08327	1.95865	3.30717	3.33454	2.95456	3.163
Glb1l3	8	gene	27885459	27927733	-	3	ensembl	protein_coding	-4.65693	-4.65693	-4.65693	-4.65693	-4.65693	-4.65693	-2.66912	-4.65693	-4.65693	-1.44882	-3.90008	-3.15503	-2.6333	-4.51347	-4.74474	-4.43061	-3.85624	-4.14212	-5.41425	-4.58351
Macf1	5	gene	144830885	145151309	-	6	ensembl	protein_coding	6.50274	6.69902	6.69704	5.241	5.65896	6.96114	6.84792	6.54502	6.60243	6.65724	6.50836	6.4921	6.71138	6.71756	5.34716	5.73695	7.04313	6.79423	6.4993	6.56234
Olr1253	4	gene	1756411	1757343	-	1	ensembl	protein_coding	-6.66032	-6.66032	-6.66032	-6.66032	-6.66032	-6.66032	-6.66032	-6.66032	-6.66032	-6.66032	-6.91865	-6.91865	-6.91865	-6.91865	-6.91865	-6.91865	-6.91865	-4.33532	-6.91865	-6.91865
Fbxw17	17	gene	17134537	17152331	-	3	ensembl	protein_coding	2.71724	2.83799	2.99248	1.68927	1.57766	2.90866	3.15804	2.81514	3.04777	3.11441	2.7284	3.00136	2.76326	3.07567	1.7859	1.67886	2.89794	3.12326	2.78957	3.01443
Lamb3	13	gene	116587121	116628793	+	5	ensembl	protein_coding	-0.172695	-0.354914	-0.282749	-1.71328	-0.9523	-1.32484	-0.635098	0.0187786	-0.138335	-0.151034	-0.154672	-0.370272	-0.419	-0.314417	-1.77039	-0.780467	-1.15107	-0.759107	-0.00595112	0.0188765
Krt27	10	gene	87051955	87057238	-	5	ensembl	protein_coding	-0.354201	-0.484638	0.251271	-1.54014	-1.05199	-0.399338	-0.562996	-0.605393	0.22255	-0.0122933	-0.636169	-0.360712	-0.567037	0.213055	-1.44792	-0.823056	-0.655228	-0.243533	-0.083492	0.0669222
RGD1566386	12	gene	20094026	20128202	-	5	ensembl	protein_coding	2.51752	2.85778	2.65671	1.68557	2.03161	3.06802	2.84988	2.96352	2.71724	2.886	2.5109	2.77722	2.84074	2.6605	1.78858	2.14406	3.11525	2.82902	2.91445	2.65311
Dnajc25	5	gene	80295287	80315200	+	5	ensembl	protein_coding	0.946509	0.808122	1.32631	-0.419977	0.526216	1.0727	1.28656	1.28067	1.10509	1.43384	1.0602	1.38405	0.646269	1.33028	-0.389219	0.684992	1.05369	1.29277	1.19589	1.10711
Pomt2	6	gene	120423138	120461156	-	6	ensembl	protein_coding	3.97788	3.91465	3.90136	2.60165	2.59263	3.96838	4.05709	3.90123	3.80295	3.87531	4.0158	3.70879	3.91771	3.90573	2.75111	2.63072	3.98871	4.04815	3.86103	3.76539
Emp1	4	gene	233415324	233449254	+	5	ensembl	protein_coding	0.164429	0.223401	0.0185444	-0.703867	-1.29965	0.514983	0.456526	0.442458	-0.165696	0.0700822	0.192264	-0.038275	-0.0104398	0.0902465	-0.419691	-1.40257	0.435891	0.51765	0.550523	-0.194394
Tcerg1	18	gene	36491823	36552727	+	6	ensembl	protein_coding	5.55832	5.61747	5.5667	4.21209	4.66429	5.54852	5.54563	5.66394	5.54555	5.82744	5.5564	5.74718	5.60619	5.59263	4.28987	4.77246	5.55909	5.48507	5.62812	5.51293
Kat5	1	gene	227898846	227906149	-	7	ensembl	protein_coding	4.95266	5.02702	5.016	3.83989	3.84294	4.99564	5.19915	5.14397	5.1556	5.2835	4.91808	5.25532	4.96306	4.97009	3.93176	3.98004	4.9823	5.16433	5.13283	5.15858
Lamp2	X	gene	124809053	124852469	-	4	ensembl	protein_coding	5.39044	5.70291	5.70784	4.51955	4.45345	6.0754	5.83704	5.54941	5.62241	5.91574	5.34071	5.83259	5.6722	5.73139	4.67975	4.50332	6.15314	5.7987	5.47547	5.5869
Olr1314	8	gene	43429126	43430043	-	2	ensembl	protein_coding	-6.79924	-4.41956	-6.79924	-6.79924	-6.79924	-6.79924	-6.79924	-6.79924	-6.79924	-6.79924	-6.81449	-6.81449	-4.28232	-6.81449	-6.81449	-6.81449	-6.81449	-6.81449	-6.81449	-6.81449
Mir181c	19	gene	36267311	36267416	-	1	ensembl	miRNA	-6.56866	-4.11927	-6.56866	-6.56866	-6.56866	-6.56866	-4.36243	-6.56866	-6.56866	-6.56866	-7.0157	-7.0157	-4.58261	-4.72146	-7.0157	-7.0157	-4.79266	-4.84004	-7.0157	-7.0157
Tsc22d3	3	gene	52711812	52715431	+	6	ensembl	protein_coding	5.51836	5.48643	4.90137	4.00581	4.12791	5.42122	5.24141	5.45042	5.06562	5.41462	5.56922	5.31998	5.49421	4.83613	4.14763	4.19208	5.45704	5.1772	5.42268	5.01702
Acsl4	X	gene	112046207	112109823	-	5	ensembl	protein_coding	6.12334	6.20274	5.83938	4.62284	4.90651	6.05117	5.79351	5.86198	5.97209	6.03763	6.16693	5.91529	6.20836	5.84821	4.72703	4.99251	6.08691	5.71207	5.79188	5.962
Klk1b3	1	gene	101264168	101268371	+	1	ensembl	protein_coding	-4.27791	-2.67019	-4.17995	-6.42371	-6.42371	-6.42371	-2.94423	-6.42371	-6.42371	-6.42371	-4.05924	-4.92655	-2.3122	-4.78937	-7.12353	-7.12353	-7.12353	-3.17472	-4.85833	-7.12353
Slc5a11	1	gene	200246621	200285416	+	6	ensembl	protein_coding	2.33156	2.60467	2.63293	1.54332	1.27087	2.30883	2.31459	2.7483	2.17117	2.60658	2.31728	2.52768	2.57133	2.65299	1.71577	1.30087	2.31825	2.24241	2.75807	2.12818
Slc36a4	8	gene	14330657	14360233	+	6	ensembl	protein_coding	4.42303	4.45721	4.12887	3.11175	2.96839	4.45972	4.45317	4.34142	4.2876	4.2454	4.48608	4.09464	4.43003	4.11148	3.22931	3.05408	4.46697	4.4389	4.28471	4.28035
Emid1	14	gene	86034840	86073361	-	4	ensembl	protein_coding	3.7445	3.42902	3.61253	2.13303	2.41454	3.56376	3.64962	3.54164	3.70272	4.17966	3.80133	4.15894	3.34548	3.58541	2.21873	2.47148	3.55094	3.61897	3.49812	3.72162
Mef2b	16	gene	20851150	20867107	-	5	ensembl	protein_coding	-2.08757	-2.66796	-2.86636	-3.54799	-6.42811	-2.94807	-1.846	-1.61548	-2.23804	-2.25076	-1.89378	-1.93587	-2.71637	-2.32876	-3.69026	-6.96165	-2.9653	-1.91548	-1.45132	-2.63754
Tbx4	10	gene	73235440	73265104	+	3	ensembl	protein_coding	0.427512	0.785923	1.28549	-0.10342	-0.823784	1.49144	1.55167	0.63551	1.20263	1.57589	0.446907	1.70845	0.872978	1.31101	0.0190526	-0.77698	1.57318	1.45104	-0.0554596	1.47868
Trnau1ap	5	gene	154159835	154173989	-	1	ensembl	protein_coding	4.34114	4.61169	4.49572	3.54378	3.77464	4.51305	4.78023	4.64044	4.50875	4.90813	4.37959	4.81832	4.48036	4.5581	3.72583	3.67506	4.64968	4.78724	4.57622	4.46714
Mir34b	8	gene	54088899	54088982	-	1	ensembl	miRNA	-6.69977	-6.69977	-6.69977	-6.69977	-6.69977	-6.69977	-6.69977	-6.69977	-6.69977	-6.69977	-6.89168	-6.89168	-6.89168	-6.89168	-6.89168	-6.89168	-4.97258	-6.89168	-6.89168	-6.89168
Cttnbp2nl	2	gene	226917956	226964542	-	4	ensembl	protein_coding	4.0305	4.0926	4.13387	2.94253	2.88889	4.50105	4.3231	3.97814	4.10727	4.42092	4.01508	4.33741	4.05805	4.1472	3.08359	2.92964	4.57992	4.28934	3.89221	4.08641
Ptprz1	4	gene	49730552	49927326	+	6	ensembl	protein_coding	6.18541	6.53902	6.23261	5.13111	5.23495	6.74184	6.50965	6.22053	6.22728	6.34992	6.0554	6.28469	6.43181	6.31669	5.22127	5.35181	6.81303	6.53423	6.18765	6.17573
Cd84	13	gene	94797092	94800870	+	5	ensembl	protein_coding	0.477536	0.177128	0.707258	-1.21617	-0.487909	1.1644	0.872222	0.734058	0.805407	0.84039	0.449135	0.823719	-0.0801512	0.973391	-0.974214	-0.587909	1.26186	0.783375	0.647399	0.777717
Krt19	10	gene	87848516	87853236	-	4	ensembl_havana	protein_coding	-3.61404	-3.35794	-1.66884	-5.63421	-5.63421	-1.74804	-2.35845	-1.27757	-2.78725	-2.32526	-3.40243	-2.25003	-4.43404	-1.80605	-5.43605	-4.53285	-2.47019	-1.55441	-1.89927	-2.62048
Mageb16	X	gene	47191590	47235382	-	4	ensembl	protein_coding	-2.85305	-6.46832	-6.46832	-6.46832	-6.46832	-6.46832	-6.46832	-6.46832	-6.46832	-6.46832	-3.06628	-4.23875	-7.08795	-7.08795	-7.08795	-7.08795	-7.08795	-7.08795	-7.08795	-4.14723
Zfp410	6	gene	117487588	117513541	-	6	ensembl	protein_coding	3.76022	4.1591	3.78685	2.67719	2.88604	3.9497	3.93056	3.89659	3.81284	4.06876	3.74494	4.06354	4.01156	3.77189	2.8815	2.86491	4.04333	3.94953	3.89702	3.69963
Scin	6	gene	69564441	69641704	-	5	ensembl	protein_coding	-2.66579	-3.18008	-5.5499	-5.5499	-5.5499	-2.63609	-5.5499	-5.5499	-5.5499	-5.5499	-4.39129	-4.03967	-3.1316	-3.56095	-8.08385	-4.74382	-4.35479	-5.8055	-4.35064	-4.86916
Scgb3a1	10	gene	34905080	34906387	+	5	ensembl	protein_coding	-6.74757	-6.74757	-4.45753	-6.74757	-4.58144	-6.74757	-6.74757	-6.74757	-6.74757	-6.74757	-6.84517	-6.84517	-6.84517	-4.57251	-6.84517	-3.68569	-6.84517	-6.84517	-6.84517	-6.84517
Rab3a	16	gene	20292237	20296302	-	5	ensembl	protein_coding	9.41607	9.26002	9.18554	8.21549	8.21297	8.96164	9.27183	9.37792	9.31309	9.65744	9.4499	9.60447	9.22261	9.18687	8.35345	8.28326	8.91249	9.21233	9.34843	9.2982
Nup160	3	gene	86204592	86267431	+	5	ensembl	protein_coding	2.16225	2.64063	2.55034	1.45031	1.27506	2.7145	2.38243	2.49565	2.34389	2.49382	2.22823	2.3221	2.57652	2.59374	1.55465	1.34775	2.85328	2.38868	2.36915	2.27476
Dse	20	gene	29528501	29603844	-	5	ensembl	protein_coding	0.599962	1.40912	1.57651	-0.0981028	0.256987	1.62984	1.51369	1.70334	1.39278	1.88675	0.538807	1.80183	1.36653	1.61816	-0.0335548	0.330159	1.64345	1.47585	1.72902	1.40063
Lrrc42	5	gene	130684407	130705517	-	5	ensembl	protein_coding	4.00964	4.2937	3.92903	2.88812	2.95718	4.01412	4.16154	4.06958	3.95352	4.22283	3.99694	4.11871	4.30037	3.93691	3.02714	3.01352	4.03886	4.14159	4.0276	3.89761
Usp11	X	gene	2481248	2497422	-	6	ensembl	protein_coding	7.11012	7.18099	6.93981	6.03127	5.87662	6.81529	7.14013	7.08469	6.9469	7.08871	7.14032	6.96908	7.19003	6.9367	6.19817	5.9264	6.77379	7.10439	7.05786	6.91778
Plcb1	3	gene	134642689	134801508	+	7	ensembl	protein_coding	5.81986	5.93053	5.84523	4.60277	5.02659	6.05015	6.03105	5.88632	5.85016	6.07099	5.84961	5.94051	5.92919	5.94712	4.79731	5.05905	6.06225	6.02419	5.73785	5.76657
Pygl	6	gene	102045139	102091169	-	4	ensembl	protein_coding	1.07234	1.41716	1.72287	-0.102539	-0.348423	2.1661	1.56589	1.502	1.70833	1.8099	1.06236	1.82543	1.33413	1.66448	0.0290757	-0.371351	2.20164	1.61781	1.47003	1.68002
Zfp317	8	gene	19964735	19983504	+	6	ensembl	protein_coding	2.48353	3.01238	2.60613	1.38891	1.49776	2.97191	2.41993	2.56596	2.69141	2.84512	2.39929	2.80479	2.95343	2.55179	1.54214	1.69711	2.99974	2.40522	2.43623	2.69328
Mir27b	17	gene	816274	816370	+	1	ensembl	miRNA	-2.71363	-1.94906	-3.37243	-5.48777	-5.48777	-1.37192	-1.36645	-2.15915	-3.39573	-3.40581	-1.81249	-4.38107	-3.26859	-3.78378	-5.61438	-3.70712	-2.21489	-1.74289	-1.86589	-2.31862
Rpa2	5	gene	154624086	154634563	+	5	ensembl	protein_coding	2.64561	2.69077	2.22534	1.15033	1.47806	2.52782	2.81927	2.64147	2.59095	2.90625	2.6662	2.82021	2.67219	2.18677	1.20434	1.53177	2.55743	2.83562	2.5881	2.61323
Igsf1	X	gene	136852224	136867466	-	6	ensembl	protein_coding	4.53828	4.82581	4.95643	3.46798	2.97725	5.54533	5.4249	4.57226	5.01036	5.27048	4.47712	5.19717	4.78523	4.96145	3.60405	3.00512	5.63599	5.43378	4.48203	5.00713
Baz2a	7	gene	2507667	2526280	+	4	ensembl	protein_coding	4.60072	4.74576	4.68599	3.23353	3.70045	4.83823	4.87346	4.67647	4.41688	4.54791	4.59746	4.38792	4.71396	4.72327	3.29741	3.82143	4.93449	4.84327	4.62385	4.37635
Nek9	6	gene	116390547	116435517	+	6	ensembl	protein_coding	5.32807	5.65731	5.39499	4.26655	4.2178	5.63211	5.63065	5.47465	5.3795	5.50007	5.31899	5.38613	5.66567	5.40916	4.39212	4.27787	5.67066	5.59973	5.42761	5.33377
Gpr150	2	gene	2811666	2812949	-	1	ensembl	protein_coding	2.55963	2.54231	2.94547	1.54656	1.49041	2.3391	2.51427	2.81055	2.54908	2.86409	2.5923	2.81144	2.18535	3.10892	1.74576	1.5849	2.27686	2.47196	2.84744	2.53654
Rnf39	20	gene	4135089	4140578	-	2	ensembl	protein_coding	3.87196	4.13324	4.08502	2.98841	3.13477	3.84007	4.21853	4.32817	4.05329	4.13674	3.83847	4.00591	4.09566	4.09651	3.10413	3.26918	3.80966	4.18383	4.359	4.02784
Zbtb43	3	gene	17825499	17834966	-	5	ensembl	protein_coding	2.34701	2.98913	2.83566	1.69689	1.8405	2.8201	2.94806	2.94164	2.67558	2.85242	2.09767	2.53668	2.91985	2.98323	1.67141	2.24545	2.78996	2.96344	3.00809	2.73123
Klrb1c	4	gene	227740338	227751968	+	4	ensembl	protein_coding	-6.70303	-6.70303	-6.70303	-6.70303	-6.70303	-6.70303	-6.70303	-6.70303	-6.70303	-6.70303	-6.88944	-5.02528	-6.88944	-6.88944	-6.88944	-6.88944	-6.88944	-6.88944	-6.88944	-6.88944
Syk	17	gene	14705881	14759165	-	6	ensembl	protein_coding	2.29039	2.46717	2.6632	1.19871	1.42856	2.70962	2.89042	2.52634	2.61478	2.67016	2.28579	2.56346	2.65599	2.50752	1.02936	1.86079	2.76661	2.79235	2.26781	2.72968
Gtpbp1	7	gene	120914233	120938682	+	6	ensembl	protein_coding	4.8735	5.27233	5.07596	3.90458	4.15781	5.20717	5.46321	5.28852	5.12476	5.30399	4.8468	5.20621	5.24846	5.07557	4.0166	4.23372	5.22716	5.46703	5.25994	5.09034
Stxbp6	6	gene	74671542	74901751	-	5	ensembl	protein_coding	2.96167	4.54847	4.38288	2.91234	3.69947	4.17358	4.1563	4.37999	3.93025	3.84175	2.82444	3.66841	4.54571	4.44834	3.11776	3.89729	4.16936	4.07671	4.35017	3.88851
Gng7	7	gene	11792645	11793928	+	3	ensembl	protein_coding	4.53322	5.32778	5.29202	4.10349	4.40937	5.18555	5.85126	5.45901	5.02732	5.38654	4.42474	4.97445	5.42202	5.19009	4.3371	4.61458	5.25936	5.85604	5.51369	4.98348
B3galnt2	17	gene	51721961	51764786	-	5	ensembl	protein_coding	2.61045	3.17611	3.00765	1.66401	2.383	3.34005	3.17564	3.16591	2.88949	3.3985	2.49568	3.18865	3.18759	3.13252	1.58934	2.59376	3.39089	3.18613	3.15217	2.89408
Kap	4	gene	230077260	230080304	-	2	ensembl	protein_coding	-6.689	-6.689	-6.689	-6.689	-6.689	-6.689	-6.689	-6.689	-6.689	-6.689	-6.89904	-6.89904	-4.79861	-6.89904	-6.89904	-6.89904	-6.89904	-6.89904	-6.89904	-6.89904
Ank3	20	gene	22243056	22609934	+	6	ensembl	protein_coding	7.53892	7.4377	7.32195	6.49797	6.55614	7.61006	7.67249	7.71017	7.62935	7.6035	7.51124	7.53754	7.40114	7.24315	6.66186	6.65963	7.6169	7.61632	7.6869	7.64355
Sphk1	10	gene	105165074	105167961	+	6	ensembl	protein_coding	-1.95845	-2.46782	-5.39319	-2.79963	-5.39319	-1.92945	-3.4286	-1.87723	-3.39141	-2.22257	-2.02702	-2.89515	-4.75396	-4.30505	-2.78573	-3.38986	-2.42463	-2.49634	-3.01723	-2.76655
Dnajc16	5	gene	164037421	164064397	-	3	ensembl	protein_coding	5.25782	5.20448	5.00032	3.75607	3.87469	5.0684	5.14211	5.08105	5.0149	5.01405	5.29721	4.87583	5.20038	5.01158	3.84993	3.97201	5.05703	5.12515	5.03037	4.99441
Gpr3	5	gene	155060345	155063424	-	5	ensembl_havana	protein_coding	1.03852	0.236013	0.771699	-0.106265	-0.221177	0.0961953	1.00877	1.01434	0.80046	1.22056	1.1369	1.09119	0.173741	0.839762	0.109265	-0.278069	0.0444501	0.974276	0.993643	0.773954
Tceanc2	5	gene	130594909	130632086	-	6	ensembl	protein_coding	2.52882	2.91786	2.57327	1.69906	1.93461	2.75211	2.6693	2.6784	2.56046	2.99986	2.47579	2.92087	2.95222	2.53185	1.83349	2.06489	2.77603	2.62751	2.64864	2.48245
Olr1335	8	gene	61665625	61666630	+	1	ensembl	protein_coding	-6.5467	-6.5467	-6.5467	-6.5467	-6.5467	-6.5467	-6.5467	-6.5467	-6.5467	-6.5467	-6.99635	-5.13219	-6.99635	-6.99635	-6.99635	-6.99635	-6.99635	-6.99635	-4.36405	-6.99635
Serpina3n	6	gene	137283364	137292168	+	4	ensembl	protein_coding	-2.76424	-2.45995	1.24995	0.484008	1.05665	-2.09383	-2.72797	-1.43237	-1.80715	-2.05262	-2.00338	-1.75829	-2.28092	1.1031	0.522338	1.24188	-2.32439	-3.56593	-1.54538	-1.93654
Olr72	1	gene	174350681	174351688	-	1	ensembl	protein_coding	-6.81374	-6.81374	-6.81374	-6.81374	-6.81374	-6.81374	-6.81374	-6.81374	-6.81374	-6.81374	-6.81374	-6.81374	-6.81374	-6.81374	-6.81374	-6.81374	-6.81374	-6.81374	-6.81374	-6.81374
Lmbr1	4	gene	2172459	2330391	-	6	ensembl	protein_coding	3.78275	3.7834	3.57104	2.8731	2.68435	3.70575	3.83642	3.8472	3.51317	3.81468	3.81381	3.70153	3.75703	3.56119	3.01709	2.76482	3.70834	3.80394	3.79661	3.48751
Hm13	3	gene	154555181	154594098	+	6	ensembl	protein_coding	5.27406	5.09487	5.28429	3.96454	4.01802	4.96737	5.3386	5.22583	5.02199	5.36803	5.30024	5.29229	5.03568	5.3345	4.05905	4.13751	4.92596	5.29376	5.1793	4.99932
Ulk1	12	gene	53646799	53673053	+	3	ensembl	protein_coding	6.28308	6.13016	6.14838	4.92461	4.9094	6.01553	6.33136	6.25641	6.07168	6.24122	6.31102	6.14232	6.08185	6.16028	5.0441	4.97803	6.00522	6.30499	6.23787	6.04613
Tctn2	12	gene	39234008	39296609	-	7	ensembl	protein_coding	3.72143	4.13607	4.02113	2.50566	3.03129	4.0611	4.24555	4.27038	3.85999	3.85831	3.90688	3.82793	4.0756	4.05136	2.7277	2.88321	4.01675	4.34461	4.07231	3.80456
Mecp2	1	gene	152450808	152452884	+	3	ensembl	protein_coding	2.50391	2.80396	2.50454	1.47668	2.04172	2.87251	2.93146	2.73513	2.73143	2.72588	2.43118	2.59652	2.86418	2.45433	1.61864	2.19313	2.90305	2.89998	2.64913	2.71709
Tcp11l2	7	gene	25004999	25031722	-	5	ensembl	protein_coding	3.4203	4.27499	3.83072	2.95014	3.23643	3.88836	4.01898	4.07428	3.82411	4.03122	3.31803	3.97968	4.29023	3.78797	3.08186	3.36001	3.94026	3.98575	4.01909	3.78667
Exoc4	4	gene	60287465	61081401	+	2	ensembl	protein_coding	4.95892	5.12138	4.98357	3.93626	3.97783	5.23685	5.19848	4.93731	5.04175	5.07667	4.9341	4.9562	5.0918	4.98933	4.06809	4.05484	5.28291	5.15424	4.88998	5.04754
Afap1l1	18	gene	56282282	56342880	-	6	ensembl	protein_coding	2.65325	2.82734	2.38047	1.5417	2.02747	2.6197	2.74733	2.70769	2.68173	2.90121	2.67213	2.81845	2.84238	2.35497	1.61865	2.14356	2.55562	2.72511	2.62061	2.73644
Cdkn1b	4	gene	232962327	232967128	+	4	ensembl	protein_coding	3.92089	4.08549	3.94649	2.64735	3.17639	4.44596	4.05815	4.00277	4.11829	4.39135	3.88454	4.32729	4.05706	3.95224	2.78708	3.24999	4.50835	3.99496	3.93432	4.0973
Trpv6	4	gene	135705697	135721360	-	6	ensembl	protein_coding	3.43049	2.93705	2.91017	2.00575	1.94746	3.14178	3.1192	3.01381	3.13931	3.32714	3.46387	3.22562	2.94945	2.89049	2.11216	1.99609	3.15002	3.06818	3.01934	3.09694
Cdk17	7	gene	34066669	34144779	+	5	ensembl	protein_coding	5.85197	6.28252	5.77245	4.90408	5.02595	5.8705	6.13913	5.99647	5.75227	5.88342	5.84082	5.74227	6.3179	5.75099	5.04616	5.13332	5.86394	6.13164	5.94328	5.70845
Best3	7	gene	60016746	60057900	+	6	ensembl	protein_coding	-0.947783	-0.284977	-1.20854	-2.80695	-0.869371	-1.83674	-0.831012	-0.924601	-1.241	-1.30569	-0.588791	-0.340458	-0.316183	-0.644316	-2.89875	-2.9276	-1.43304	-1.8401	-0.138981	-1.12844
Bsg	7	gene	13044573	13051789	-	7	ensembl	protein_coding	8.9742	8.87762	8.9813	7.9583	7.98785	8.87775	9.05345	9.22723	9.14609	9.395	8.97795	9.32306	8.81063	8.9925	8.09752	8.06385	8.85295	8.99892	9.2171	9.14431
Ccr5	8	gene	132349212	132366437	+	1	ensembl	protein_coding	1.12456	1.2421	0.686926	0.00748695	0.275169	0.742599	1.30355	0.988818	0.874245	1.41108	1.06053	1.32423	1.27102	0.410191	0.59242	-0.161095	0.964072	1.62567	0.53154	1.03796
RGD1561661	X	gene	14231154	14232618	+	4	ensembl	protein_coding	-2.49588	-2.18191	-1.94881	-4.46581	-4.42967	-2.46399	-2.74089	-3.0493	-1.97791	-2.70565	-2.5207	-2.87286	-1.96479	-1.91805	-4.421	-4.45303	-2.48298	-2.85257	-3.18383	-1.79001
Lenep	2	gene	208141747	208141932	-	1	ensembl	protein_coding	-0.243821	-0.690923	-0.173737	-0.998314	-1.20152	-0.625088	0.10686	-0.507953	-0.114057	0.071398	-0.895259	-0.395115	-0.94047	-0.20963	-0.432272	-0.473263	0.265498	-0.919178	-0.0216686	-0.355792
Cps1	9	gene	73071951	73184007	-	5	ensembl_havana	protein_coding	0.1339	0.0643904	-0.787688	-1.8686	-1.50327	-0.282471	-0.692293	-0.165381	-0.0599631	-0.300927	0.310446	-0.456726	-0.0366548	-0.878528	-1.97655	-1.22673	-0.196751	-0.632876	-0.306537	-0.0613923
Scpep1	10	gene	73846394	73880404	+	5	ensembl	protein_coding	4.32244	4.42639	4.65462	3.25032	3.23099	4.81604	4.80274	4.5844	4.66093	4.90493	4.28442	4.81957	4.37393	4.68517	3.37016	3.26699	4.86239	4.80271	4.54217	4.6463
Snap91	8	gene	93963290	94074083	-	5	ensembl	protein_coding	8.07934	7.98767	7.87265	6.64937	6.7418	7.87687	7.93422	7.98188	8.03088	8.02885	8.11057	7.92388	7.92264	7.89254	6.74932	6.80557	7.86229	7.90304	7.96119	8.05249
Mtdh	7	gene	72939139	72994607	+	5	ensembl	protein_coding	4.83533	4.77745	4.96115	3.71993	4.02073	5.04534	5.03858	5.16056	4.96769	5.32081	4.80703	5.24105	4.73024	4.97012	3.81155	4.11208	5.07502	5.00276	5.13151	4.96622
Dcaf11	15	gene	38124950	38134699	+	5	ensembl	protein_coding	5.23769	5.34955	5.41687	4.13018	4.28406	5.32973	5.58306	5.3897	5.37844	5.52571	5.27846	5.45543	5.36815	5.38302	4.2696	4.36437	5.30954	5.55672	5.33414	5.30556
Myo1b	9	gene	54267753	54414206	+	7	ensembl	protein_coding	2.58531	2.77747	2.47101	1.56629	1.79968	2.90792	2.52151	2.55784	2.237	2.86897	2.54718	2.80789	2.73976	2.38664	1.6435	1.985	3.02957	2.47118	2.51486	2.16743
RGD1306063	15	gene	16900269	16915111	-	3	ensembl	protein_coding	3.16103	3.42934	2.71579	2.09624	2.01647	3.14906	3.09377	3.19887	2.96639	3.45452	3.0493	3.44106	3.28263	2.7179	2.45333	2.0852	3.30171	2.96289	3.04512	2.94235
Nphp4	5	gene	173212951	173298420	+	6	ensembl	protein_coding	4.45017	4.63922	4.5497	3.44535	3.72399	4.67772	4.92788	4.84937	4.66806	4.61716	4.43921	4.48155	4.59216	4.57	3.56942	3.79076	4.69159	4.92434	4.84382	4.64577
Ropn1l	2	gene	104193712	104204276	-	2	ensembl	protein_coding	0.106171	-0.100146	-0.0659249	-0.944907	-1.46274	0.66274	0.100482	0.15291	0.0569655	0.964659	0.024365	0.94059	-0.0919175	-0.15493	-0.873297	-1.25186	0.686276	-0.098152	0.292301	-0.00316457
Grik1	11	gene	31426908	31828130	-	7	ensembl	protein_coding	1.22378	1.19125	1.21103	0.304601	-0.237641	0.994744	0.761751	0.672558	0.512382	1.48435	1.01418	1.16861	1.15902	1.1509	0.327859	0.312049	1.00872	0.901131	0.558832	0.517501
Wnk1	4	gene	219537467	219662816	-	7	ensembl	protein_coding	5.79295	6.03917	5.77356	4.59718	4.90045	6.20604	6.02426	5.75433	5.81813	5.94244	5.72327	5.77963	6.06278	5.78383	4.797	4.9609	6.2254	5.95823	5.75379	5.80368
Vom2r79	9	gene	8218607	8267236	-	1	ensembl	protein_coding	-4.6231	-4.6231	-4.6231	-4.6231	-4.6231	-4.6231	-4.6231	-4.6231	-4.6231	-4.6231	-4.00133	-4.03712	-4.44244	-4.37131	-5.52934	-5.55845	-5.23775	-4.31496	-4.65303	-4.0853
Stc1	15	gene	54622230	54632873	+	4	ensembl	protein_coding	0.485539	1.11646	0.917322	0.0367027	0.611718	1.22781	1.19528	1.14647	1.01039	1.36005	0.356724	1.14318	1.07118	0.970248	0.221297	0.764718	1.21006	1.18931	1.16717	1.01385
Tacr2	20	gene	33683625	33697583	+	1	ensembl	protein_coding	1.46091	0.897458	1.62425	0.147378	0.384392	1.64418	1.59168	1.30597	1.80802	1.40066	1.46479	1.24113	0.741569	1.62243	0.257512	0.634403	1.66506	1.51322	1.27037	1.8544
Sod2	1	gene	51827380	51834230	+	4	ensembl	protein_coding	6.78896	6.74284	6.72315	5.58303	5.57513	6.72272	6.63566	6.76501	6.70339	7.05132	6.81685	6.98268	6.71513	6.73888	5.71456	5.63795	6.73209	6.55271	6.72518	6.67519
Sncaip	18	gene	46954706	47092054	+	5	ensembl	protein_coding	1.3831	1.57354	1.53478	0.408514	0.678196	2.14054	2.36047	1.63969	1.13069	1.87641	1.37318	1.78457	1.5138	1.60327	0.496351	0.873309	2.17827	2.36828	1.5292	1.0057
Ccl9	10	gene	70416900	70421785	-	5	ensembl_havana	protein_coding	-1.63678	0.0329012	-1.60829	-3.6694	-1.21944	-2.45105	-1.92077	-1.07266	-1.81836	-1.57353	-0.826631	-3.68415	-0.574468	-0.719747	-0.626142	-3.68415	-1.57505	-3.68415	-0.791223	-0.771679
Edn3	3	gene	178903017	178925563	+	4	ensembl	protein_coding	-0.929281	-1.18647	-0.0461246	-1.20465	-1.27341	-0.185743	-0.125865	-0.934529	-0.585463	0.279195	-1.07868	0.112431	-1.51132	-0.145996	-1.15772	-1.19638	0.0651261	-0.141202	-0.616894	-0.521709
Gipc3	7	gene	11412757	11417446	+	4	ensembl	protein_coding	0.44322	0.691801	0.689697	-1.22648	-0.415506	0.441139	1.07517	0.91659	1.01106	0.584423	0.461222	0.30501	0.634678	0.766185	-1.0956	-0.273768	0.353657	1.11309	0.881799	1.06484
Tab2	1	gene	3696211	3770496	-	6	ensembl	protein_coding	4.98953	5.38847	5.22511	3.95708	4.18098	5.46897	5.5667	5.28573	5.12829	5.34097	4.96091	5.23131	5.36777	5.23074	4.0723	4.2506	5.51079	5.56413	5.23462	5.10865
Crisp2	9	gene	22361201	22385461	+	6	ensembl	protein_coding	-6.68157	-6.68157	-4.35308	-4.51734	-6.68157	-6.68157	-6.68157	-4.37546	-6.68157	-6.68157	-6.88418	-6.88418	-6.88418	-4.65657	-3.24753	-6.88418	-6.88418	-6.88418	-3.92353	-6.88418
Nr2c2ap	16	gene	20886517	20888715	-	6	ensembl_havana	protein_coding	5.02255	4.95621	4.88932	3.90003	4.16522	4.84403	5.03209	5.15902	4.99656	5.49004	5.06347	5.45363	4.92959	4.87089	3.98711	4.25401	4.83161	4.9764	5.10031	4.98805
Cd244	13	gene	94597696	94618284	+	7	ensembl	protein_coding	1.64785	1.25682	1.3864	0.383697	0.5038	1.74126	1.22221	1.60739	1.82531	2.01447	1.49421	2.05693	1.59361	1.32929	0.532294	0.561187	1.66056	1.12588	1.45708	1.77818
Kdm4d	8	gene	13454692	13456224	-	1	ensembl	protein_coding	0.0115493	-0.384903	-1.00468	-1.79598	-1.75237	-0.935608	-0.554133	-0.876964	-1.2069	-0.756029	-0.188641	-0.630924	-0.824827	-1.00178	-1.65267	-1.93289	-1.30744	-0.0467807	-0.790922	-0.87914
Epas1	6	gene	20299621	20377837	+	5	ensembl	protein_coding	6.76958	6.70202	6.51378	5.31801	5.38977	6.7212	7.06321	6.83775	6.62008	6.72975	6.78855	6.60815	6.68646	6.49767	5.42638	5.45649	6.72506	7.06787	6.81736	6.59115
Fbxl16	10	gene	14996746	14999921	+	2	ensembl	protein_coding	8.11251	8.12121	8.21592	7.04896	6.90609	8.05703	8.54257	8.34803	8.23049	8.33185	8.11614	8.2184	8.08915	8.2461	7.15975	6.9528	8.04128	8.54975	8.32678	8.2145
Fam160a1	2	gene	204330567	204386506	-	1	ensembl	protein_coding	-0.473992	-0.0406722	0.0796192	-1.44299	-1.60472	-0.658556	-0.118591	-0.280588	-0.107804	-0.447052	-0.52332	-0.9642	-0.228697	0.0465888	-1.64262	-1.67897	-0.106874	0.184883	-0.102598	-0.0795323
Eaf2	11	gene	69969912	70013412	+	5	ensembl	protein_coding	-2.93806	-3.13003	-2.19768	-3.4839	-4.20804	-2.27862	-2.27308	-2.50018	-2.50375	-2.23808	-2.72959	-2.28542	-3.72247	-2.10888	-3.21794	-3.81757	-2.20165	-2.48849	-3.00643	-2.17299
Olr148	1	gene	175452981	175453952	+	3	ensembl	protein_coding	-6.689	-6.689	-6.689	-6.689	-6.689	-6.689	-6.689	-6.689	-6.689	-6.689	-6.89904	-6.89904	-4.79861	-6.89904	-6.89904	-6.89904	-6.89904	-6.89904	-6.89904	-6.89904
Tlx2	4	gene	178585975	178587437	-	4	ensembl	protein_coding	-5.28111	-5.28111	-3.14787	-5.28111	-5.28111	-5.28111	-5.28111	-5.28111	-5.28111	-5.28111	-4.26696	-5.28808	-4.9541	-5.12265	-5.93831	-4.47763	-4.64224	-6.16713	-4.63787	-5.18291
Kcnk16	15	gene	8575512	8582655	+	4	ensembl	protein_coding	-2.49967	-0.699399	-0.804489	-1.87328	-2.02363	0.052782	-0.488614	-0.24668	-0.509692	0.0492998	-2.47373	-0.0145107	-0.898105	-0.879697	-1.07421	-2.26543	0.0242222	-0.629422	-0.296942	-0.535549
Naga	7	gene	123547945	123556139	-	6	ensembl	protein_coding	4.3617	4.77774	4.74561	3.41549	3.68763	4.67466	4.90826	4.74736	4.64121	5.08435	4.33754	5.0805	4.59664	4.78495	3.60717	3.59573	4.73395	4.93333	4.72432	4.64987
Lmo2	3	gene	100560598	100572022	+	6	ensembl	protein_coding	2.77635	3.25746	3.41838	2.25521	2.78839	3.35299	3.27617	3.81887	3.6569	4.10691	2.93657	3.98405	3.25456	3.4272	2.27192	3.00325	3.29885	3.16927	3.80806	3.5539
LOC298795	6	gene	33617273	33618544	+	5	ensembl	protein_coding	-1.04956	-0.2953	0.372129	-1.41617	-1.03698	-0.478847	-0.564699	0.0793214	-0.361824	-0.319593	-1.57237	0.31872	-0.0730015	-0.537179	-1.7261	-0.646898	-0.464069	-0.251237	0.318365	-0.437753
Wdr61	8	gene	57877398	57894572	-	6	ensembl	protein_coding	4.95146	5.13065	4.94229	3.94769	4.10766	5.04923	5.02942	5.02774	4.97354	5.33613	4.93892	5.27456	5.10626	4.93118	4.08864	4.16772	5.06958	4.96336	5.0283	4.92728
Sst	11	gene	80374262	80375447	-	2	ensembl	protein_coding	5.23524	4.98851	4.72835	3.81752	4.64641	4.36161	4.88319	5.42904	4.58446	5.3733	5.24382	5.30731	4.91176	4.67943	3.96875	4.87217	4.27098	4.82968	5.44518	4.51853
Aox2	9	gene	64973842	65072438	+	3	ensembl	protein_coding	-3.07322	-3.58365	-5.93571	-5.93571	-5.93571	-2.20051	-1.48612	-3.77397	-2.99397	-3.78744	-2.92831	-3.54373	-4.16267	-5.20453	-7.63508	-3.30218	-2.6689	-2.21515	-4.40471	-2.64075
Sema3g	16	gene	7231864	7243496	+	6	ensembl	protein_coding	2.98665	2.5999	2.52471	1.43418	1.57874	2.6262	2.95064	2.81362	2.47799	2.84402	3.05133	2.70848	2.58532	2.4592	1.57314	1.62409	2.64039	2.9584	2.78632	2.44998
Rpl36a	X	gene	105292221	105294934	+	4	ensembl	protein_coding	5.18991	5.72114	5.41262	4.40636	4.558	5.47453	5.68002	5.57449	5.55253	5.93699	5.19273	5.95543	5.57843	5.49708	4.58464	4.52981	5.26216	5.73818	5.58161	5.58652
Zbtb5	5	gene	65047763	65067167	-	5	ensembl	protein_coding	2.70652	2.87087	2.62362	1.81574	2.07265	2.98584	3.05193	2.86309	2.6567	3.04431	2.65821	2.96536	2.84537	2.56347	1.96842	2.14882	3.02908	3.05192	2.83013	2.63051
Mtg2	3	gene	181654577	181661966	-	6	ensembl	protein_coding	4.2782	4.40541	4.43117	3.37266	3.34346	4.37941	4.5684	4.61908	4.32012	4.67702	4.24703	4.58855	4.37114	4.46152	3.50538	3.41512	4.36807	4.56056	4.6091	4.26845
Extl3	15	gene	52169314	52192414	-	2	ensembl	protein_coding	5.77001	5.76204	5.7327	4.52939	4.42669	5.84435	6.17526	5.93101	5.71814	5.79704	5.78156	5.66292	5.71027	5.71796	4.65624	4.46045	5.84789	6.19909	5.9306	5.71963
Bco1	19	gene	60424580	60460636	+	4	ensembl	protein_coding	-1.895	-1.86491	-1.38554	-3.42624	-2.60792	-1.9541	-1.85529	-1.22282	-1.55843	-1.42917	-1.87058	-0.969424	-1.97206	-1.74959	-3.40915	-2.59248	-2.21604	-0.949148	-2.21202	-1.25891
Dmgdh	2	gene	42469965	42545053	+	4	ensembl	protein_coding	-2.62757	-3.17913	-6.34677	-4.30967	-4.27366	-2.95344	-2.948	-2.89798	-6.34677	-2.91356	-3.05721	-2.12105	-3.16264	-4.74954	-4.65554	-4.68773	-2.70741	-3.07893	-3.41191	-7.16461
Musk	5	gene	79560900	79649636	+	4	ensembl	protein_coding	-3.3466	-1.29634	-1.34582	-6.22691	-6.22691	-2.82647	-4.09516	-3.26342	-2.13269	-3.27847	-2.85953	-4.99883	-1.56896	-1.48072	-7.2647	-4.79573	-2.82174	-2.40652	-3.52399	-2.31804
Fgf13	X	gene	142078585	142189620	-	2	ensembl	protein_coding	7.18204	7.33085	6.97213	6.10634	5.80186	7.09176	7.02641	6.99135	6.96696	7.29191	7.20596	7.20462	7.33633	6.97173	6.28063	5.83625	7.11288	6.96088	6.923	6.92934
Nr1i3	13	gene	94213148	94218142	+	5	ensembl	protein_coding	2.18815	1.64043	1.36159	0.601787	-0.157372	1.36144	1.74111	1.24958	1.52818	1.91603	1.92009	1.70993	1.71502	1.37997	0.346872	0.324317	1.48124	1.73347	1.36021	1.45981
Plce1	1	gene	264652842	264956663	+	5	ensembl	protein_coding	2.88657	2.8213	2.55943	1.58674	1.61593	3.32819	3.03013	2.92862	2.96219	3.21496	2.95384	3.10168	2.76697	2.50771	1.68802	1.68197	3.40667	2.9556	2.89937	2.97222
Tab1	7	gene	121340948	121371923	+	6	ensembl	protein_coding	4.74434	4.82661	4.88823	3.83202	3.83096	4.9333	5.09837	4.92181	4.85428	5.07857	4.74767	4.97828	4.76068	4.89998	3.94578	3.91161	4.947	5.07583	4.90996	4.83168
Stk32c	1	gene	218367084	218446952	-	4	ensembl	protein_coding	5.72519	6.43932	6.46102	5.44193	5.78557	5.92954	6.55691	6.66846	6.30989	6.31334	5.60345	6.18695	6.426	6.48177	5.6272	5.96973	5.85024	6.52491	6.66969	6.2912
Hook2	19	gene	37082461	37094975	+	6	ensembl	protein_coding	2.56629	2.37886	3.05585	1.6669	1.7963	2.71686	2.83088	2.60959	2.83337	2.74453	2.59564	2.63643	2.28154	3.108	1.77142	1.96012	2.69417	2.79345	2.54902	2.80964
Ccdc89	1	gene	160870465	160871577	+	5	ensembl	protein_coding	-0.375251	-0.878117	-0.942747	-1.12926	-3.06675	-0.421186	-0.337133	-0.0741731	-0.737587	-0.379326	-0.874785	-0.221256	-0.626541	-0.672196	-1.41066	-2.86176	-0.134772	-0.647089	-0.0876166	-0.804857
Vwa7	20	gene	7081524	7092056	+	3	ensembl	protein_coding	0.159641	0.731064	0.323446	-1.04938	0.00715808	-0.177668	0.428881	0.311334	0.219984	0.704818	0.295705	0.13758	0.706433	0.631073	-1.13191	-0.0273143	0.0950905	0.571506	0.544339	-0.163227
Thsd7a	4	gene	38500796	38938890	-	4	ensembl	protein_coding	3.94248	4.15711	4.06573	2.94683	3.39142	3.87141	4.05601	4.09839	3.66033	3.41629	3.93683	3.22776	4.19064	4.10728	3.08413	3.56049	3.83443	4.02559	4.03823	3.6006
Bcas3	10	gene	72660660	72944206	+	6	ensembl	protein_coding	5.82462	5.85485	5.76121	4.60792	4.67015	5.86344	5.90076	5.80798	5.98869	6.12339	5.86188	5.95024	5.90376	5.75598	4.72272	4.69366	5.87015	5.88454	5.75057	6.00953
Hdac2	20	gene	44811967	44835337	-	5	ensembl	protein_coding	5.57702	5.94721	5.56091	4.63908	4.9208	5.63915	5.65523	5.82745	5.67248	5.95145	5.56355	5.8739	5.93282	5.54213	4.77177	4.98485	5.63518	5.59603	5.8224	5.66815
Bst2	16	gene	19800348	19803919	-	5	ensembl	protein_coding	2.15846	2.00509	2.83961	1.05586	1.25245	3.29632	3.34667	2.3803	2.45049	3.27389	2.06582	3.21204	1.91569	2.84263	1.1655	1.37558	3.35555	3.36035	2.38509	2.38089
Nfatc2ip	1	gene	204767892	204782663	-	6	ensembl	protein_coding	0.588031	0.813908	0.848559	-0.767701	-0.145808	1.38146	1.22479	0.90209	0.54839	0.568672	0.655227	0.333609	0.808969	0.883647	-0.65602	0.108078	1.48883	1.24565	0.762423	0.331978
Acp6	2	gene	218767629	218789268	+	6	ensembl	protein_coding	3.39704	3.66638	3.18464	2.30427	2.69553	3.54949	3.65805	3.58827	3.41912	3.66194	3.3679	3.59423	3.64859	3.17716	2.43289	2.77853	3.58457	3.61308	3.55325	3.37454
Raph1	9	gene	67107597	67184496	-	6	ensembl	protein_coding	3.36026	3.66638	3.46141	2.505	2.60207	3.66023	3.60797	3.60301	3.4061	3.31541	3.23902	3.17892	3.61277	3.51379	2.60725	2.77653	3.68268	3.69772	3.54866	3.33051
Adcy3	6	gene	38378060	38454925	+	5	ensembl	protein_coding	6.88167	6.53351	6.4524	5.41003	5.24716	6.48886	6.68328	6.5552	6.63004	6.76032	6.94609	6.68738	6.4844	6.44858	5.5458	5.28246	6.4784	6.64685	6.5104	6.61211
Chka	1	gene	225950376	225998825	+	7	ensembl	protein_coding	4.02887	4.19488	4.32699	3.0217	3.42587	4.41171	4.46555	4.42213	4.22039	4.45995	3.97722	4.34762	4.11526	4.39102	3.17131	3.49784	4.4322	4.44639	4.39252	4.20665
Chrnb3	16	gene	68502911	68539031	-	5	ensembl	protein_coding	-4.26328	-3.23245	-6.27953	-6.27953	-6.27953	-3.01535	-3.48113	-4.1915	-4.19447	-4.20451	-4.91627	-4.03755	-3.69628	-3.86852	-7.38292	-4.73637	-3.95755	-4.01707	-4.87866	-3.93009
Krr1	7	gene	54780329	54791757	+	6	ensembl	protein_coding	2.4531	2.76315	2.53656	1.25367	1.89163	2.84421	2.69342	2.62253	2.39466	2.82327	2.41197	2.72362	2.76787	2.51269	1.36287	2.0282	2.92261	2.67621	2.5696	2.30055
Mrpl52	15	gene	36955394	36958618	+	3	ensembl	protein_coding	4.15768	4.24403	4.25662	3.13533	3.44182	4.39042	4.38743	4.46213	4.42112	4.82047	4.12238	4.82114	4.06251	4.29235	3.21244	3.56854	4.41912	4.3512	4.45742	4.40993
Zic4	8	gene	98243374	98252520	+	7	ensembl	protein_coding	-0.555171	-0.220216	-0.158846	-0.557936	-1.02674	0.537097	0.394645	0.369641	0.234986	0.433036	-0.890644	0.328004	-0.370446	0.241674	-1.02877	-0.693614	0.707421	0.592762	0.196782	0.367324
Alx3	2	gene	229848434	229853533	+	5	ensembl_havana	protein_coding	-3.57176	-3.27955	-2.9754	-4.40566	-3.11194	-1.40667	-3.53705	-3.48908	-2.64617	-1.94848	-3.83827	-1.95374	-3.00171	-2.76917	-4.50376	-3.09833	-1.40937	-3.31504	-3.25251	-3.22984
Ubp1	8	gene	121510557	121553887	+	6	ensembl	protein_coding	4.88893	5.1884	5.10181	3.84546	4.11407	5.06114	5.29427	5.20405	4.87145	5.08799	4.83445	4.99819	5.16346	5.12928	3.93736	4.24427	5.06869	5.28156	5.18625	4.81407
Ank1	16	gene	73314002	73459822	-	6	ensembl	protein_coding	4.05978	3.98853	3.69507	2.88011	2.57969	3.67572	4.13022	4.08457	3.23943	3.76898	4.12121	3.66038	4.00606	3.66756	3.00532	2.6728	3.6279	4.09141	4.03924	3.21022
Taf9b	X	gene	56401294	56416144	-	6	ensembl_havana	protein_coding	4.83478	4.8878	4.49604	3.59579	3.5545	4.74916	4.76897	4.70089	4.52725	5.08856	4.849	5.04639	4.88571	4.49037	3.72955	3.60753	4.78897	4.67903	4.63347	4.49371
Atg16l2	1	gene	172590904	172603337	-	6	ensembl	protein_coding	1.22371	1.41717	1.54403	0.010778	0.315042	1.86841	1.91125	1.41141	1.6137	1.93547	1.1291	1.84957	1.31319	1.53047	0.215095	0.310834	1.97686	1.89863	1.43843	1.58878
Pbk	15	gene	49092280	49103281	-	6	ensembl	protein_coding	-2.43214	-2.40332	-3.46923	-6.50069	-4.39222	-3.04948	-2.3941	-3.49296	-2.99669	-2.64476	-2.15789	-2.96821	-2.6388	-3.19277	-6.93334	-4.51749	-3.27718	-2.64439	-2.88646	-2.55905
Fxyd5	1	gene	90620339	90629722	-	4	ensembl	protein_coding	2.49558	2.27497	2.44074	0.771287	1.44488	2.4595	2.77671	2.35291	2.4116	3.10006	2.4023	2.98975	2.08844	2.41858	0.959928	1.50468	2.44958	2.83411	2.28205	2.59883
Gpr4	1	gene	81401780	81403267	+	5	ensembl	protein_coding	1.22527	0.979642	0.943511	0.179102	0.0965778	1.45187	1.44111	1.35357	1.12853	1.55784	1.3106	1.4567	1.01196	0.855714	0.306855	0.169883	1.47072	1.40508	1.35683	1.01267
Prox1	13	gene	113004597	113060843	+	4	ensembl	protein_coding	3.47299	5.40186	4.86945	3.68046	4.4756	4.84703	5.15713	5.12846	4.49608	4.03228	3.32339	3.79415	5.44294	4.86136	3.91208	4.71914	4.85227	5.12053	5.10774	4.42774
Nhp2	10	gene	36841743	36845032	+	1	ensembl	protein_coding	4.26669	4.05664	4.2389	3.26053	3.06949	4.06485	4.35694	4.38776	4.28515	4.68352	4.31021	4.64746	4.13644	4.10942	3.38174	3.21291	4.0789	4.27403	4.3365	4.18286
Dhx30	8	gene	117515770	117542943	-	4	ensembl	protein_coding	6.87052	6.83587	6.88114	5.72818	5.78623	6.83548	7.12123	7.0536	6.89483	7.09545	6.86495	7.01469	6.79025	6.89065	5.84673	5.85046	6.82847	7.09923	7.04701	6.87009
Ola1	3	gene	66275428	66395046	-	6	ensembl	protein_coding	6.01993	6.05298	5.80563	4.68449	4.75877	5.98122	5.74951	5.83819	5.92732	6.28656	6.05068	6.23724	6.03909	5.793	4.79941	4.83363	5.99425	5.66557	5.7791	5.91262
Nrg1	16	gene	63540981	63718742	+	7	ensembl	protein_coding	-4.43145	-2.24485	-1.67188	-4.43145	-4.43145	-4.43145	-2.46193	-2.42178	-4.43145	-4.43145	-2.65579	-3.4346	-3.30857	-3.36632	-4.69422	-5.10243	-3.09689	-2.95739	-3.33301	-3.43992
Pank4	5	gene	175823559	175840289	+	5	ensembl	protein_coding	4.48099	4.27964	4.48028	3.31388	3.45739	4.35704	4.66417	4.63315	4.51194	4.60676	4.47491	4.55067	4.22865	4.46552	3.4043	3.58126	4.36424	4.64043	4.61248	4.46277
Dyrk1b	1	gene	86329130	86336571	+	6	ensembl	protein_coding	4.36043	4.31219	4.68825	3.19698	3.56339	4.50183	4.80778	4.65703	4.7036	4.70544	4.33471	4.60245	4.26187	4.71653	3.23858	3.72409	4.5035	4.81523	4.62997	4.66998
Espnl	9	gene	98136649	98159968	+	5	ensembl	protein_coding	-3.82982	-5.97434	-2.05388	-3.89011	-3.85326	-2.13697	-5.97434	-2.94863	-2.95213	-2.96399	-3.52088	-2.79988	-7.49393	-2.28391	-3.68022	-5.09807	-2.53591	-3.54189	-2.71657	-2.90624
Ddc	14	gene	91689895	91793700	-	7	ensembl	protein_coding	0.503647	0.699147	0.772358	-0.743406	-0.342215	0.953614	0.646426	0.477276	0.532445	0.681841	0.598305	0.272393	0.679674	0.741681	-0.334799	-0.256711	1.156	0.451254	0.34468	0.528659
Rgs9	10	gene	97225541	97298645	-	6	ensembl	protein_coding	1.12444	2.23784	2.09216	0.83918	1.18033	1.51655	2.0799	2.17561	1.5881	1.60762	1.04937	1.48003	2.26291	2.09153	0.966674	1.39855	1.46107	2.01816	2.20446	1.50897
Fshr	6	gene	22754761	22955080	-	6	ensembl	protein_coding	-3.9489	-1.65046	-3.9489	-3.9489	-3.9489	-3.9489	-3.9489	-3.9489	-3.9489	-3.9489	-2.70928	-3.08588	-3.96976	-4.45728	-4.33901	-4.75762	-3.50078	-3.12589	-3.4961	-3.749
Akr1b8	4	gene	61491248	61503814	+	3	ensembl	protein_coding	-0.981702	-0.68304	-1.60384	-2.58491	-1.95261	-0.657749	-0.489237	-1.01227	-0.696709	-0.533932	-1.14894	-0.650434	-0.890989	-1.19485	-1.68798	-2.06436	-1.30043	-0.435829	-1.00857	-0.813612
Serpinb13	13	gene	32181102	32211674	+	4	ensembl	protein_coding	-6.40971	-3.95621	-6.40971	-6.40971	-6.40971	-6.40971	-3.38756	-6.40971	-6.40971	-6.40971	-4.97117	-5.00472	-4.73162	-7.15947	-3.94321	-7.15947	-7.15947	-4.17345	-7.15947	-7.15947
Asb9	X	gene	32074331	32110290	-	5	ensembl	protein_coding	-3.82058	-4.33735	-6.7186	-6.7186	-6.7186	-3.79074	-2.64754	-6.7186	-6.7186	-3.75203	-3.68895	-3.72807	-4.29072	-6.82042	-6.82042	-6.82042	-3.65412	-2.47727	-6.82042	-6.82042
Ctns	10	gene	59488895	59503993	-	5	ensembl	protein_coding	2.24088	2.25531	2.35756	0.835153	1.12499	2.58299	2.61151	2.53809	2.04784	2.47955	2.25616	2.41211	2.19658	2.38451	0.957166	1.2005	2.58801	2.61371	2.4958	1.96932
H6pd	5	gene	170640289	170671849	-	5	ensembl	protein_coding	2.49483	2.63148	2.68142	1.45681	1.80245	2.84442	2.92536	2.84551	2.58229	2.50522	2.55499	2.33027	2.70197	2.64713	1.54553	1.91531	2.87529	2.93235	2.8015	2.46545
Olr943	7	gene	7935969	8080276	+	1	ensembl	protein_coding	-6.46558	-6.46558	-6.46558	-6.46558	-6.46558	-6.46558	-6.46558	-6.46558	-6.46558	-6.46558	-5.15864	-7.05183	-7.05183	-7.05183	-7.05183	-5.02057	-7.05183	-7.05183	-7.05183	-5.11381
Slc23a1	18	gene	28127016	28139054	-	5	ensembl	protein_coding	-3.22633	-3.73272	-6.06616	-3.29147	-2.77023	-6.06616	-1.48161	-1.4297	-2.02947	-3.9349	-4.25881	-3.74906	-3.00247	-7.49056	-3.47171	-2.5177	-2.94725	-2.00112	-1.93396	-2.6561
Cd248	1	gene	227377520	227380084	+	4	ensembl	protein_coding	2.87282	2.90168	2.9783	1.87522	1.58385	2.96572	2.9109	3.15501	3.06854	3.46729	2.94265	3.24841	2.8202	2.80478	1.78051	1.86128	3.09443	3.09254	3.0845	3.05003
Gna13	10	gene	97371692	97404295	+	2	ensembl	protein_coding	1.79976	2.04783	1.95017	1.31617	1.22391	2.45265	2.69671	2.03418	2.22625	2.119	1.97379	1.657	2.14238	1.90933	1.66681	1.24337	2.62872	2.77589	1.76539	2.10395
Tnfsf4	13	gene	84166838	84190569	+	5	ensembl_havana	protein_coding	-6.44141	-3.25784	-0.966221	-2.77397	-3.5784	-1.63039	-1.77791	-2.33153	-1.31287	-1.91482	-6.9742	-2.15824	-2.60459	-0.993309	-2.66446	-3.0979	-1.71942	-1.94801	-2.54654	-1.27871
Eif2s3y	X	gene	63800221	63884994	-	7	ensembl_havana	protein_coding	4.99387	5.10851	4.91574	3.67965	3.96536	5.17257	4.79392	4.99971	5.09508	5.32608	4.918	5.14403	5.20829	4.89063	3.85205	4.08302	5.17563	5.05398	4.92099	4.80388
Mtif3	12	gene	11958153	11969303	+	1	ensembl	protein_coding	2.79682	2.851	2.85486	1.93687	1.97081	2.81784	3.07271	2.8413	2.75879	3.14614	2.94442	2.87446	2.83119	2.95085	2.15953	1.92971	2.885	3.09809	2.65562	2.71827
Coq7	1	gene	195121560	195137541	-	3	ensembl	protein_coding	3.35783	3.7478	3.69634	2.77677	2.59581	3.48372	3.73492	3.7989	3.64652	3.92582	3.25262	3.85084	3.66692	3.80184	2.91651	2.63936	3.48765	3.72102	3.81553	3.61214
RGD1305014	1	gene	208958026	208974579	-	5	ensembl	protein_coding	2.4651	2.52004	2.2253	0.8777	1.02061	2.53726	2.55849	2.55662	2.37283	2.83305	2.48036	2.78939	2.46949	2.17883	0.948172	1.09994	2.52152	2.52751	2.55324	2.39854
Olr250	1	gene	179344326	179345273	+	1	ensembl	protein_coding	-6.81374	-6.81374	-6.81374	-6.81374	-6.81374	-6.81374	-6.81374	-6.81374	-6.81374	-6.81374	-6.81374	-6.81374	-6.81374	-6.81374	-6.81374	-6.81374	-6.81374	-6.81374	-6.81374	-6.81374
Nmur2	10	gene	41221604	41235468	-	2	ensembl	protein_coding	-3.30954	-6.60581	-1.57472	-2.01628	-1.08539	-1.34846	-0.544171	-1.29059	-4.48097	-0.198824	-2.58976	-0.252057	-6.83179	-1.26903	-2.0218	-0.641407	-2.55108	-1.26987	-1.53356	-3.4944
Map7	1	gene	17239998	17290726	+	5	ensembl	protein_coding	4.83958	5.47394	5.36965	3.94356	4.48536	5.54662	5.35182	5.47172	5.41805	5.4687	4.69063	5.26905	5.44341	5.37813	3.96488	4.7018	5.61009	5.36857	5.42655	5.51588
Rgs5	13	gene	92595346	92631357	+	6	ensembl	protein_coding	2.13966	2.26417	1.41561	0.614641	0.868805	2.50979	1.87905	1.6478	1.94163	2.34676	2.21406	2.21811	2.28113	1.40254	0.67851	1.04262	2.57753	1.72683	1.65105	1.83555
Crisp3	9	gene	22926874	22948639	+	5	ensembl	protein_coding	-4.91	-3.28218	-7.70612	-5.72442	-5.68939	-3.55766	-4.05212	-5.59451	-4.35458	-4.36628	-5.66132	-5.66132	-5.66132	-5.66132	-5.66132	-5.66132	-3.21199	-5.66132	-3.20821	-3.18783
Mocs2	2	gene	71520174	71532081	+	5	ensembl	protein_coding	4.88938	5.00246	4.94741	4.11061	3.92874	4.95954	5.02733	5.1888	5.08289	5.43392	4.89648	5.35693	4.9784	4.92304	4.30528	3.99041	4.97501	4.93775	5.14364	5.06414
Dydc2	16	gene	18506996	18514860	-	3	ensembl	protein_coding	-2.23271	-2.43721	-2.63482	-4.43638	-3.62169	-2.43376	-2.42811	-2.37632	-1.94748	-1.37166	-2.06512	-1.33781	-2.55531	-2.72426	-4.4383	-3.59482	-2.81199	-2.56101	-1.83247	-1.99906
Cyp39a1	9	gene	18681949	18758013	-	5	ensembl	protein_coding	-0.978032	-0.496197	-1.16968	-2.10999	-2.29195	-0.43052	-0.853108	-0.801529	-0.892779	-0.585691	-0.860705	-0.819417	-0.446006	-1.39057	-2.19288	-1.79765	-0.421209	-0.884808	-0.814478	-0.981751
Defb29	3	gene	154353772	154355231	-	3	ensembl	protein_coding	-4.515	-6.68844	-6.68844	-6.68844	-4.53876	-3.16978	-6.68844	-6.68844	-6.68844	-6.68844	-3.86817	-6.88071	-6.88071	-6.88071	-6.88071	-3.69052	-3.31895	-6.88071	-6.88071	-6.88071
Tmem18	6	gene	58209471	58215201	+	4	ensembl	protein_coding	2.65342	2.86655	2.86447	1.5861	1.8416	2.97034	2.77366	2.89074	2.62922	2.74851	2.60224	2.59624	2.83793	2.91844	1.74786	1.95934	3.03677	2.73756	2.85394	2.53429
Hsd17b1	10	gene	88786054	88788253	+	5	ensembl	protein_coding	-0.0827516	0.40614	0.151677	-1.90038	-0.209388	0.318933	0.13303	0.103239	0.00863908	0.211693	-0.223842	0.649744	-0.49481	-0.352645	-1.50846	-0.146907	0.848951	0.998994	-0.0695212	-0.560668
Aspg	6	gene	145692075	145711786	+	3	ensembl	protein_coding	0.348525	0.507346	1.79879	-0.359417	-0.314316	2.16747	2.37937	1.05257	2.06207	2.34522	0.262925	2.34067	0.495892	1.77032	-0.363493	-0.268785	2.30921	2.37184	0.98356	2.08549
Amy1a	2	gene	234523262	234538403	-	4	ensembl	protein_coding	-6.65208	-4.2117	-6.65208	-6.65208	-6.65208	-3.65151	-3.64609	-4.40916	-6.65208	-3.61183	-6.87849	-3.37479	-3.58508	-6.87849	-6.87849	-6.87849	-3.81847	-2.97857	-4.64133	-6.87849
Zfp213	10	gene	12706830	12713743	-	5	ensembl	protein_coding	3.52286	3.30279	3.55487	2.34059	2.73645	3.73427	3.93591	3.81657	3.51721	4.04924	3.50459	3.97274	3.2307	3.58467	2.44367	2.79691	3.76456	3.91062	3.82217	3.48014
Fgfr2	1	gene	207626734	207731841	-	7	ensembl	protein_coding	5.1733	5.41802	5.40612	4.02471	3.93306	5.62763	5.52927	5.41709	5.38012	5.53834	5.09851	5.39466	5.32293	5.40806	4.30303	4.06136	5.66404	5.5883	5.26267	5.34409
Rhoj	6	gene	107702937	107785229	+	3	ensembl	protein_coding	1.2418	1.36736	1.49177	0.164929	0.409204	1.35216	1.90491	1.41081	1.59971	1.75486	1.38714	1.6998	1.42811	1.41039	0.191603	0.52813	1.31373	1.87446	1.21595	1.6482
Elovl7	2	gene	59446064	59459522	-	5	ensembl	protein_coding	0.986827	1.51576	1.19074	0.174492	-0.123663	1.67839	0.9123	0.91795	0.986038	1.32045	1.05039	1.1482	1.54892	1.39212	0.254933	-0.188618	1.72793	0.784054	0.88026	0.961096
Ankrd9	6	gene	145000298	145002580	+	5	ensembl	protein_coding	3.73403	3.17889	3.7464	2.54809	2.61635	3.67997	3.98317	4.04766	3.81178	4.1961	3.71746	4.13808	3.04908	3.74039	2.65906	2.70607	3.69227	3.95289	4.07961	3.80752
Psmb3	10	gene	85437464	85444560	+	6	ensembl	protein_coding	5.34662	5.45228	5.3818	4.46492	4.47171	5.43553	5.55403	5.62026	5.40807	5.84722	5.3567	5.84243	5.40967	5.38846	4.6306	4.49333	5.38241	5.51876	5.6198	5.34028
Nlrp3	10	gene	45649991	45674234	+	5	ensembl	protein_coding	0.957181	0.902247	1.34611	-0.388393	-0.118541	1.45468	1.53953	0.792369	1.19821	1.30406	0.902113	1.21141	0.830196	1.39509	-0.286623	-0.0169846	1.51519	1.53942	0.748491	1.14915
Zpbp	14	gene	91152515	91343430	-	4	ensembl	protein_coding	-0.347941	-0.927336	-1.25034	-1.57158	-2.54647	-0.505613	-1.32756	-1.56084	-1.41412	-0.607732	-0.408113	-0.653856	-0.795383	-1.43858	-1.61997	-2.25589	-0.367668	-1.59565	-1.66915	-1.25527
Mblac1	12	gene	21393471	21394732	+	4	ensembl	protein_coding	3.04969	2.74262	2.94557	1.91454	1.95902	2.88682	2.99391	3.2332	3.11532	3.53267	3.02115	3.47989	2.69235	2.9667	2.02217	2.05026	2.83984	2.95868	3.21179	3.13052
Nxph3	10	gene	83138261	83142939	-	3	ensembl	protein_coding	0.354068	0.175219	-0.182292	-1.01086	-1.11515	-0.105412	0.228562	-0.0481345	-0.0517973	-0.223241	0.0646838	-0.0488544	0.458024	-0.578673	-0.957879	-0.728916	-0.177195	0.164987	0.0109077	-0.186121
Arrdc4	1	gene	130820199	130829248	-	6	ensembl	protein_coding	0.354939	0.916971	0.649499	-0.613223	-0.425781	0.565524	1.01812	0.838544	0.363506	0.429495	0.285025	0.484174	0.81983	0.601597	-0.437082	-0.477503	0.538653	1.04666	0.842901	0.393344
LOC680200	1	gene	39184216	39200503	-	2	ensembl	protein_coding	-0.970225	-0.210579	-0.410527	-1.72165	-1.10844	-0.653589	-0.279271	-0.16441	-0.59966	-1.00781	-1.0889	-0.887751	-0.304936	-0.245199	-1.63763	-1.06344	-0.342094	-0.464929	-0.39513	-0.696143
Ifngr2	11	gene	35302873	35321145	+	5	ensembl	protein_coding	5.61015	5.4216	5.33935	4.24482	4.17005	5.3337	5.49032	5.34869	5.49768	5.55698	5.67647	5.47688	5.37363	5.33592	4.40938	4.183	5.30925	5.46992	5.30563	5.47328
Bnip3l	15	gene	47927967	47951099	+	5	ensembl	protein_coding	6.55961	6.72687	6.40862	5.49546	5.55051	6.56905	6.5743	6.59205	6.58072	6.80757	6.55986	6.73892	6.73684	6.39565	5.62344	5.63056	6.57134	6.51323	6.53718	6.55774
Rmdn3	3	gene	117494482	117515087	-	5	ensembl	protein_coding	4.79696	4.732	4.67096	3.69323	3.64427	4.84807	4.83478	4.9411	4.80639	5.09931	4.77711	4.99932	4.78406	4.69105	3.85968	3.74284	4.84311	4.77412	4.88762	4.70815
Rabepk	3	gene	19164931	19185412	-	5	ensembl	protein_coding	4.41263	4.645	4.52991	3.64514	3.62263	4.33601	4.75689	4.72224	4.60321	4.88057	4.36294	4.77712	4.64745	4.56355	3.68563	3.82114	4.32838	4.73029	4.67236	4.56536
Nov	7	gene	95015159	95022176	+	4	ensembl	protein_coding	3.95835	3.26006	4.32049	2.79943	2.91741	5.07764	5.43106	4.34092	3.48708	5.32756	3.96993	5.31457	3.09618	4.33216	2.92572	2.97212	5.16841	5.50758	4.29471	3.33861
Rad21	7	gene	92155547	92182749	-	5	ensembl	protein_coding	5.54332	6.01137	5.65309	4.51495	4.7828	5.94418	5.82481	5.85691	5.59205	5.90671	5.50235	5.81456	6.03063	5.6422	4.64378	4.85581	5.98724	5.78063	5.82601	5.547
Rsl24d1	8	gene	73286446	73295207	-	6	ensembl	protein_coding	4.94244	5.22637	4.89194	3.95815	4.04821	4.86015	5.00046	5.06853	4.92169	5.187	4.91961	5.11488	5.22222	4.88975	4.11748	4.12801	4.79592	4.9519	5.06363	4.90156
Mir875	7	gene	74588190	74588262	-	1	ensembl	miRNA	-6.7013	-6.7013	-6.7013	-6.7013	-6.7013	-6.7013	-6.7013	-6.7013	-6.7013	-6.7013	-4.99744	-6.89062	-6.89062	-6.89062	-6.89062	-6.89062	-6.89062	-6.89062	-6.89062	-6.89062
Rasl11a	12	gene	12093851	12098070	-	4	ensembl	protein_coding	2.34382	2.16879	2.9745	1.31602	1.29823	2.4057	2.11038	2.67693	3.13617	3.10026	2.20642	3.10035	2.03741	3.0073	1.55597	1.42411	2.333	2.01764	2.63098	3.21764
Emc6	10	gene	59481630	59481962	-	6	ensembl	protein_coding	4.13952	3.90369	3.86743	2.96085	3.15568	3.86338	4.19775	4.34295	4.17121	4.61051	4.05753	4.64558	3.67587	3.91898	3.08426	3.26665	3.79291	4.21932	4.35219	4.19968
Tacstd2	4	gene	163127461	163128414	-	4	ensembl	protein_coding	-6.52379	-6.52379	-4.30826	-4.46455	-6.52379	-6.52379	-6.52379	-6.52379	-4.33267	-4.34322	-4.78578	-4.8206	-7.05724	-4.68094	-4.58845	-7.05724	-4.75469	-7.05724	-7.05724	-4.73199
Aoah	17	gene	57368445	57604881	+	5	ensembl	protein_coding	-4.31639	-4.04169	-2.89289	-6.48324	-6.48324	-2.31489	-2.96962	-4.23925	-3.42956	-2.56387	-4.76289	-2.33581	-3.14744	-2.92696	-6.96507	-6.96507	-2.07549	-2.77033	-3.90313	-3.88245
Tor1aip2	13	gene	78633864	78660388	+	5	ensembl	protein_coding	3.70911	3.93525	3.60451	2.47707	2.86293	4.06513	4.06306	3.82351	3.5062	3.99026	3.71061	3.90511	3.90414	3.62411	2.63163	2.882	4.13232	4.04496	3.78425	3.41787
Star	16	gene	70698593	70705478	-	3	ensembl	protein_coding	-1.73973	-0.142421	-0.203754	-2.25707	-0.953664	-0.713186	-0.892543	-1.32471	-0.6625	-0.859106	-1.59564	-0.767228	-0.216028	-0.810714	-1.31428	-1.01185	-0.873225	-0.987946	-1.67906	-0.492717
Rap1gap2	10	gene	60909166	60963561	-	6	ensembl	protein_coding	7.1325	7.46483	7.11152	6.1403	6.07484	6.94754	7.31519	7.30598	7.20179	7.09424	7.15002	6.95461	7.48835	7.1021	6.28434	6.14241	6.90302	7.29479	7.28381	7.18528
Gpr15	11	gene	47191271	47193356	+	2	ensembl	protein_coding	-2.46826	-2.92081	-2.26649	-3.38382	-3.33118	-2.56391	-2.07755	-2.72058	-3.56402	-3.20974	-2.41846	-1.7273	-4.35864	-2.32891	-4.35864	-2.27696	-4.35864	-1.71119	-0.608993	-4.35864
Guf1	14	gene	62712388	62731766	+	6	ensembl	protein_coding	2.84963	3.07137	3.02773	1.95923	1.95945	3.33546	3.15319	3.02959	2.73043	3.30199	2.72579	3.22116	3.02959	3.08061	2.08967	2.03353	3.30439	3.15452	3.02238	2.75641
Dhfr	2	gene	41137390	41166022	+	5	ensembl_havana	protein_coding	0.120169	0.325596	0.367192	-1.39705	-1.51695	0.447447	0.248767	0.50347	0.295638	0.327112	0.136872	0.0450519	0.312135	0.285816	-1.0925	-1.03693	0.482283	0.0693028	0.186373	0.332985
Slc47a1	10	gene	47383154	47440136	-	6	ensembl	protein_coding	-2.55274	-2.73493	-2.90976	-2.28487	-5.69605	-1.92684	-0.767928	-1.03849	-1.474	-2.48669	-2.27638	-1.28146	-1.93033	-3.88758	-2.95533	-3.80723	-2.88993	-1.07316	-1.899	-1.87189
Cpa1	4	gene	57713899	57720026	+	3	ensembl	protein_coding	-5.73331	-5.73331	-5.73331	-5.73331	-5.73331	-5.73331	-5.73331	-2.72011	-5.73331	-5.73331	-5.62678	-5.66121	-3.97927	-5.52312	-7.87267	-5.46299	-4.75387	-5.64456	-4.22178	-5.5736
Rabif	13	gene	56374231	56385517	+	5	ensembl	protein_coding	3.13753	3.48714	3.03254	2.02943	2.09023	3.1482	3.15398	3.15402	3.18082	3.32446	3.30026	3.24672	3.44533	3.04916	2.02989	2.20628	3.00237	3.13791	3.12724	3.1932
Snrpn	1	gene	202123032	202145397	-	6	ensembl	protein_coding	8.40507	8.4306	8.23583	7.193	7.26703	8.14259	8.30842	8.42204	8.42355	8.68278	8.3818	8.63744	8.40929	8.2637	7.31858	7.35438	8.08178	8.23272	8.43113	8.40006
Treh	8	gene	47602121	47615939	+	6	ensembl	protein_coding	-2.12337	-2.68107	-5.88405	-5.88405	-5.88405	-5.88405	-3.73303	-2.89377	-5.88405	-3.70287	-2.67163	-5.43924	-2.20508	-2.73258	-7.67495	-5.23884	-5.37336	-3.35004	-4.518	-5.35066
Pycr2	13	gene	104182940	104186733	+	4	ensembl	protein_coding	3.91259	4.04633	4.38242	2.91144	3.27887	4.26991	4.47568	4.53272	4.35076	4.58546	3.84624	4.51977	4.02296	4.42463	2.99243	3.36597	4.28286	4.4261	4.50775	4.35748
Hoxd12	3	gene	68063896	68065017	+	5	ensembl	protein_coding	-1.50694	-4.19056	-4.19056	-4.19056	-4.19056	-4.19056	-2.20438	-2.1639	-4.19056	-4.19056	-3.72216	-3.05909	-4.64256	-2.85857	-4.46151	-4.28693	-2.40347	-2.95358	-3.80469	-3.01658
Carhsp1	10	gene	5842867	5856458	+	5	ensembl	protein_coding	5.06494	5.65238	5.57535	4.20926	4.36932	5.86214	5.72968	5.46699	5.74776	5.91063	4.99532	5.84346	5.64907	5.60012	4.28545	4.44773	5.9042	5.6925	5.39523	5.77536
Ffar1	1	gene	90463925	90464827	-	1	ensembl	protein_coding	-6.21124	-6.21124	-6.21124	-6.21124	-6.21124	-6.21124	-6.21124	-3.07998	-6.21124	-6.21124	-5.19724	-5.23001	-7.33498	-5.09857	-7.33498	-5.04133	-7.33498	-5.21416	-3.8599	-7.33498
Nrip3	1	gene	181370497	181396068	-	5	ensembl	protein_coding	8.85236	8.76802	8.60688	7.54279	7.66857	8.92926	8.70005	8.81704	8.80561	9.16544	8.87351	9.11218	8.73012	8.58765	7.66656	7.73223	8.96767	8.62525	8.77389	8.78697
Serinc2	5	gene	152187838	152210009	-	6	ensembl	protein_coding	3.60249	3.88432	3.99892	2.74479	2.90115	3.30823	4.01398	3.86929	3.55988	3.41632	3.60511	3.28262	3.86766	4.0626	2.89836	3.04411	3.18427	3.99615	3.84961	3.50887
Dars	13	gene	50158684	50212425	-	5	ensembl	protein_coding	4.17258	4.4254	4.19812	3.00125	3.21404	4.53405	4.25262	4.16699	4.14598	4.49966	4.16545	4.45395	4.40408	4.21589	3.04358	3.38761	4.52144	4.16733	4.17191	4.07945
LOC100363112	3	gene	125876306	125907457	+	2	ensembl	protein_coding	-2.3278	-2.33697	-2.22182	-2.85724	-3.10824	-2.18659	-1.93651	-1.90086	-2.33058	-2.50358	-3.64496	-3.64496	-0.778138	-0.91207	-3.64496	-1.58693	-3.64496	-3.64496	-0.526866	-1.6814
Arhgef2	2	gene	207396432	207423791	+	6	ensembl	protein_coding	6.72516	6.88262	6.75769	5.58833	5.87125	6.76214	6.99493	6.92517	6.84375	6.94246	6.71913	6.84409	6.86549	6.76039	5.70238	5.94745	6.76068	6.96891	6.89741	6.82756
Atoh7	20	gene	28923499	28923948	-	2	ensembl	protein_coding	-1.15356	-1.12636	-1.88071	-5.73139	-2.01314	-1.39387	-1.11767	-1.50076	-0.849089	-0.763046	-1.62109	-0.961646	-1.7044	-1.60431	-4.32873	-2.64894	-1.34159	-1.30546	-1.33655	-0.676873
Olr1560	11	gene	46895864	46896817	+	1	ensembl	protein_coding	-5.91207	-5.91207	-5.91207	-5.91207	-5.91207	-5.91207	-5.91207	-5.91207	-5.91207	-5.91207	-4.83028	-5.5662	-4.60083	-7.43036	-5.37271	-5.39911	-7.43036	-5.55217	-5.50831	-7.43036
Nlgn2	10	gene	56177613	56189966	-	7	ensembl	protein_coding	7.50217	7.29301	7.44998	6.21603	6.2937	7.35043	7.71003	7.59197	7.55773	7.5006	7.50684	7.37248	7.16933	7.50113	6.31064	6.3201	7.40025	7.72804	7.57696	7.57985
Zfp763	7	gene	15455707	15460067	-	6	ensembl	protein_coding	2.73712	2.96276	2.78604	1.73518	2.00377	3.04845	2.72042	2.84001	2.98188	2.90403	2.75367	2.664	3.00256	2.77016	1.84829	2.12973	3.1684	2.62476	2.75722	3.00087
Stkld1	3	gene	10843780	10862695	+	4	ensembl	protein_coding	-1.66746	-2.96586	-3.15822	-3.33542	-6.22399	-4.04077	-2.36055	-2.67669	-3.18575	-4.00525	-2.00755	-2.75108	-2.6699	-3.51812	-3.03061	-7.20119	-3.60124	-3.27744	-2.9165	-2.64633
Mir484	10	gene	27845	27921	-	1	ensembl	miRNA	-6.2085	-6.2085	-6.2085	-6.2085	-6.2085	-6.2085	-6.2085	-6.2085	-6.2085	-6.2085	-5.33446	-7.22764	-4.39811	-7.22764	-7.22764	-3.69693	-7.22764	-7.22764	-7.22764	-5.28962
Asmtl	12	gene	20517050	20519715	+	5	ensembl	protein_coding	4.32267	4.24752	4.66832	3.58013	3.74324	4.48527	4.86401	4.81202	4.62928	5.32294	4.29348	5.29249	4.13489	4.67298	3.73296	3.8226	4.45529	4.85902	4.79752	4.61418
Tktl1	1	gene	152248857	152281793	-	2	ensembl	protein_coding	-5.99445	-5.99445	-5.99445	-5.99445	-5.99445	-5.99445	-5.99445	-5.99445	-5.99445	-5.99445	-4.77394	-5.50986	-4.54449	-5.39346	-7.37402	-7.37402	-7.37402	-4.79069	-7.37402	-5.436
Neurl1b	10	gene	16945337	16972071	-	4	ensembl	protein_coding	3.50382	2.63336	3.18852	1.70475	1.56647	3.25004	3.66025	3.26056	3.05904	3.10816	3.55928	2.92821	2.47487	3.21436	1.80318	1.66225	3.30713	3.66322	3.29077	3.0317
Riok2	1	gene	60057339	60073786	+	5	ensembl	protein_coding	3.02442	3.37166	2.99123	1.8668	1.76598	3.02954	3.21227	3.0827	2.84005	3.12103	3.04321	3.05702	3.39779	2.98483	1.99378	1.80134	3.05967	3.17693	3.01996	2.77115
Olr378	1	gene	237802715	237803677	-	1	ensembl	protein_coding	-6.69571	-6.69571	-4.39014	-6.69571	-6.69571	-6.69571	-6.69571	-6.69571	-6.69571	-6.69571	-4.75157	-6.90598	-6.90598	-4.65213	-6.90598	-6.90598	-6.90598	-6.90598	-6.90598	-6.90598
Mx1	11	gene	41398738	41420543	-	6	ensembl	protein_coding	0.349247	-0.993819	0.281761	-1.08966	-2.88067	0.977727	1.56979	-1.55332	0.592976	0.334674	0.133426	0.765641	-1.84101	0.157321	-1.67968	-1.23757	0.645953	1.80875	-0.962907	-0.201228
Bcs1l	9	gene	81630647	81634579	+	5	ensembl	protein_coding	3.19264	3.46599	3.29414	2.14264	2.1767	3.38948	3.12962	3.21341	3.21992	3.35641	3.18436	3.27134	3.4498	3.34668	2.31947	2.21913	3.4501	3.01946	3.15045	3.17017
Lyve1	1	gene	182650925	182664312	-	4	ensembl	protein_coding	-0.011476	0.0732426	-0.818375	-0.629129	-0.966811	0.0946541	-0.172351	0.382096	-0.84835	-0.0510799	-0.348449	0.264483	0.230241	-1.00023	-1.02438	-0.483821	0.0844756	-0.448358	0.398741	-0.620287
Pygo2	2	gene	208171771	208176564	+	4	ensembl	protein_coding	5.58654	5.69053	5.43235	4.43029	4.65267	5.61334	5.92768	5.73238	5.54183	5.71962	5.58102	5.60777	5.627	5.44884	4.50311	4.76024	5.62486	5.92636	5.73458	5.51344
Cspg4	8	gene	60101160	60136205	+	5	ensembl	protein_coding	4.76917	4.8884	4.89398	3.79923	3.66005	5.17178	5.22754	5.08579	4.93975	4.86678	4.77813	4.7585	4.84593	4.88986	3.9115	3.74754	5.22017	5.19488	5.0272	4.92875
Gcgr	10	gene	109301091	109309258	+	3	ensembl	protein_coding	-5.03663	-2.87144	-5.03663	-2.462	-5.03663	-5.03663	-1.12191	-3.04664	-2.3286	-5.03663	-4.12204	-4.17273	-4.61797	-2.79215	-4.68844	-3.88408	-4.44818	-2.16412	-3.07616	-3.04789
Obp2a	3	gene	2891496	2894775	+	1	ensembl	protein_coding	-4.41758	-6.63713	-6.63713	-4.47998	-6.63713	-6.63713	-6.63713	-6.63713	-6.63713	-6.63713	-4.00673	-6.94235	-6.94235	-6.94235	-4.61916	-6.94235	-6.94235	-6.94235	-4.77227	-6.94235
Rpl10a	20	gene	10108670	10111228	+	6	ensembl	protein_coding	5.1191	5.14898	5.41786	4.21241	4.01947	5.38974	5.55394	5.49094	5.28537	5.66214	5.08855	5.62342	5.10514	5.34884	4.2699	4.32757	5.23834	5.53786	5.46378	5.29653
Pwp2	20	gene	13398455	13412219	+	6	ensembl	protein_coding	4.77493	4.86971	4.63353	3.55492	3.65595	4.58988	4.89324	4.93233	4.71223	4.8557	4.79339	4.74057	4.85676	4.62994	3.67694	3.72402	4.57651	4.86725	4.92226	4.68476
Hs3st5	20	gene	41969878	42279750	+	3	ensembl	protein_coding	-3.22039	-1.42672	-3.87418	-2.47824	-1.75703	-2.38103	-1.69394	-1.33238	-2.33033	-2.07197	-2.42037	-2.26148	-1.5392	-2.79697	-2.16044	-1.36304	-3.22969	-2.05666	-1.53803	-3.20033
Sdf4	5	gene	176901518	176918493	+	5	ensembl	protein_coding	5.9412	6.00612	5.88811	4.89301	4.7734	5.9843	6.06811	6.00904	5.87028	6.08088	5.95197	5.99186	5.98281	5.89438	5.04266	4.81032	5.99301	6.03047	5.97074	5.84622
Eefsec	4	gene	185435789	185630486	-	6	ensembl	protein_coding	4.39769	4.33718	4.24081	3.26533	3.34321	4.26876	4.4108	4.52295	4.28915	4.67665	4.41901	4.58281	4.33883	4.20231	3.33052	3.4404	4.20721	4.43456	4.47159	4.3253
Als2	9	gene	65769813	65823755	-	5	ensembl	protein_coding	4.93904	4.95136	4.81686	3.59307	3.55609	5.01349	5.12466	4.87861	4.71764	4.84129	4.95697	4.71119	4.92868	4.81338	3.75789	3.59625	5.06057	5.10756	4.83801	4.66159
Tcl1a	6	gene	138085869	138091862	-	4	ensembl	protein_coding	-6.05719	-3.42443	-6.05719	-6.05719	-6.05719	-6.05719	-6.05719	-6.05719	-6.05719	-6.05719	-7.40023	-4.18135	-4.37454	-5.28236	-7.40023	-7.40023	-5.34809	-7.40023	-4.58544	-4.56642
Ing1	16	gene	82745456	82746160	-	6	ensembl	protein_coding	3.75242	3.96965	3.84653	2.8488	2.89294	3.91452	3.976	3.99362	3.65249	3.9249	3.62941	3.79447	3.86096	3.90557	3.12979	2.90972	3.90272	4.04482	4.01561	3.57878
Mfn2	5	gene	168227300	168252497	-	1	ensembl	protein_coding	7.24118	7.33579	7.08424	6.02206	6.09715	7.08676	7.38511	7.2568	7.14598	7.30359	7.2704	7.23433	7.29323	7.07142	6.19666	6.10917	7.07809	7.34351	7.24038	7.12148
Pcdh20	15	gene	75353079	75359335	-	4	ensembl	protein_coding	5.79946	6.03189	5.80966	4.53767	4.85846	5.93006	5.84863	5.92517	5.60005	6.04279	5.80788	5.95962	6.03376	5.80847	4.6408	4.95903	5.9631	5.7956	5.8829	5.53267
Mpo	10	gene	75004128	75014496	-	6	ensembl	protein_coding	-2.16648	-5.17385	-2.0677	-5.17385	-5.17385	-1.81942	-2.57201	-2.08935	-2.09253	-1.53084	-3.30088	-3.11286	-3.19632	-2.30617	-3.27459	-3.32315	-3.25185	-2.34109	-2.25674	-3.49626
Rad9b	12	gene	41579810	41610543	+	4	ensembl	protein_coding	0.237526	0.341978	0.534613	-0.843807	-0.432824	0.381731	0.703211	0.668629	0.833345	1.1451	0.125464	1.12593	0.309213	0.515316	-0.593162	-0.397531	0.297338	0.633269	0.671263	0.8824
Rpl23	10	gene	85510910	85514900	-	6	ensembl	protein_coding	6.3993	6.97792	6.51855	5.62526	5.89784	6.84334	6.75958	6.75341	6.73537	7.17529	6.34986	7.10753	6.94739	6.51727	5.79221	5.93317	6.88088	6.73263	6.7096	6.71532
Gjb6	15	gene	41248073	41256852	-	4	ensembl	protein_coding	5.20109	5.17134	4.9127	4.09242	3.77402	5.09014	5.22993	5.41306	4.80455	5.38349	5.2212	5.30357	5.1563	4.88403	4.26398	3.80828	5.08978	5.19573	5.41781	4.73205
Kpna1	11	gene	70740054	70791248	-	5	ensembl	protein_coding	5.24742	5.41858	4.97199	3.77941	4.01033	5.40145	5.3087	5.13988	5.04104	5.10653	5.18149	5.14134	5.44576	5.01172	3.96498	4.14506	5.25648	5.13206	5.13435	5.01208
Pcdhga7	18	gene	30558239	30560872	+	4	ensembl	protein_coding	4.8669	5.08341	4.99624	3.74408	4.08452	5.17175	5.31756	5.22109	5.02503	5.29328	5.0597	5.0861	5.21501	5.04178	3.61077	4.04021	5.36943	5.22199	5.24362	4.91527
Erbb2	10	gene	86163531	86187663	+	6	ensembl	protein_coding	1.01363	1.38217	1.55631	-0.115134	-0.174973	1.73893	2.08728	1.72925	1.44141	1.69828	0.935651	1.67318	1.14463	1.67552	0.0484795	-0.229131	1.78896	2.1402	1.73255	1.44712
Nrsn2	3	gene	154190944	154199640	-	5	ensembl	protein_coding	6.2289	6.23629	6.02339	5.14085	5.03814	5.75863	6.29795	6.27386	6.01773	6.26047	6.25292	6.1733	6.22861	6.01508	5.30763	5.09006	5.69398	6.28168	6.25305	5.9799
Arsb	2	gene	42559883	42719688	+	6	ensembl	protein_coding	6.41354	6.68012	6.76144	5.47501	5.66886	6.87976	6.95152	6.68106	6.73487	6.63597	6.2797	6.55684	6.726	6.77351	5.68332	5.70477	6.84048	6.92324	6.69182	6.70247
Olr1121	8	gene	18786219	18787160	-	2	ensembl	protein_coding	-6.69959	-6.69959	-6.69959	-6.69959	-6.69959	-6.69959	-6.69959	-6.69959	-6.69959	-6.69959	-6.8918	-6.8918	-6.8918	-6.8918	-6.8918	-6.8918	-6.8918	-6.8918	-4.96974	-6.8918
Klk11	1	gene	100780866	100785406	+	5	ensembl	protein_coding	0.86212	0.355532	0.51541	-0.994169	-1.18503	0.778146	0.9009	0.449288	0.600113	0.39106	0.816295	0.473732	0.214585	0.59296	-0.836175	-1.27245	0.974426	0.74305	0.502922	0.464024
Slc15a2	11	gene	70022984	70052072	+	4	ensembl	protein_coding	5.24984	5.56596	5.61456	4.24721	4.36408	5.79982	5.73934	5.45119	5.3502	5.69101	5.21325	5.58952	5.53634	5.63807	4.37086	4.43543	5.85847	5.72853	5.39335	5.30939
Mmp10	8	gene	5737185	5745085	+	1	ensembl	protein_coding	-4.20365	-4.20365	-4.20365	-4.20365	-4.20365	-4.20365	-4.20365	-4.20365	-4.20365	-1.90195	-2.81488	-3.13102	-3.51181	-3.8964	-5.99207	-3.41356	-4.107	-5.07029	-4.57319	-3.22459
Nfia	5	gene	120364845	120695028	+	6	ensembl	protein_coding	4.43037	4.7791	5.0859	3.86078	4.0592	5.30988	5.2973	5.02538	4.99923	5.28063	4.35413	5.1804	4.81623	5.07286	3.96209	4.20191	5.37135	5.23932	4.98278	4.9467
Stfa3l1	11	gene	70631055	70638688	-	1	ensembl	protein_coding	-6.57896	-6.57896	-6.57896	-6.57896	-6.57896	-6.57896	-6.57896	-6.57896	-6.57896	-6.57896	-6.97429	-6.97429	-6.97429	-6.97429	-6.97429	-4.94303	-6.97429	-6.97429	-5.05224	-6.97429
Rab20	16	gene	82824911	82848168	+	2	ensembl	protein_coding	-0.29592	-0.448333	-0.297543	-1.20924	-1.68352	0.355778	0.645843	0.265291	-0.15322	0.46678	-0.290387	0.332892	-0.551513	-0.280045	-1.13618	-1.60294	0.419251	0.699284	0.217143	-0.161589
Dhx16	20	gene	5466494	5483190	-	3	ensembl	protein_coding	4.34397	4.46047	4.9967	3.35775	3.74069	4.62265	4.8585	4.68102	4.63999	4.78061	4.31073	4.65121	4.41213	5.0356	3.46573	3.86819	4.61425	4.83583	4.66351	4.62517
Nedd1	7	gene	33615235	33655544	-	5	ensembl	protein_coding	0.624214	0.973547	0.479731	-0.472281	-0.0390781	1.45313	0.691921	0.623552	0.450452	0.812508	0.708112	0.662099	1.02899	0.429089	-0.278645	-0.00975399	1.53637	0.59062	0.452898	0.477915
Ngp	8	gene	118006028	118009392	+	4	ensembl	protein_coding	-3.59462	-4.11824	-6.53102	-6.53102	-3.62077	-6.53102	-4.35776	-6.53102	-6.53102	-3.52516	-3.41075	-3.45073	-4.52601	-7.00858	-7.00858	-3.75423	-4.74034	-3.95526	-7.00858	-7.00858
Clrn2	14	gene	70194126	70203808	-	3	ensembl	protein_coding	-6.11926	-6.11926	-6.11926	-6.11926	-6.11926	-6.11926	-6.11926	-6.11926	-6.11926	-3.71454	-4.57191	-4.60664	-7.35217	-7.35217	-5.15193	-4.40796	-7.35217	-5.34382	-5.29693	-7.35217
Cd164l2	5	gene	155079244	155082300	+	5	ensembl	protein_coding	0.138277	0.219537	-0.0243326	-1.84806	-1.29384	0.3689	0.519478	0.651568	0.112838	1.14107	0.362613	0.911436	-0.128927	0.088213	-1.79551	-0.896313	-0.0696734	0.664681	0.65984	0.189071
Dolpp1	3	gene	14310907	14319391	+	6	ensembl	protein_coding	3.50338	3.32534	3.56752	2.33026	2.34689	3.45488	3.69671	3.68507	3.3684	3.63536	3.54216	3.54241	3.28851	3.55476	2.4667	2.40446	3.44213	3.6718	3.65301	3.34786
Tanc1	3	gene	50829732	51028013	+	5	ensembl	protein_coding	6.96915	7.18543	7.14443	5.78792	6.07141	7.15743	7.15185	7.19316	7.14956	7.00759	6.95879	6.86295	7.18419	7.16919	5.89742	6.15407	7.18039	7.10457	7.16375	7.14259
Fam129a	13	gene	73927637	74076132	+	6	ensembl	protein_coding	-1.4769	-0.429464	-0.162991	-1.69621	-3.33627	0.67646	0.47355	-1.2545	0.233942	0.048993	-1.57838	-0.0505755	-0.511091	-0.135039	-1.80361	-2.86993	0.706807	0.436769	-1.281	0.162657
Lpin2	9	gene	118970173	119045052	+	6	ensembl	protein_coding	5.71502	6.13845	5.63676	4.64004	4.84944	5.79607	6.05535	5.93133	5.44062	5.71911	5.71341	5.57973	6.16499	5.61265	4.77017	4.96423	5.80146	6.05209	5.9084	5.35507
Nipsnap3a	5	gene	73973488	73984223	+	2	ensembl	protein_coding	-5.98056	-5.98056	-5.98056	-5.98056	-5.98056	-5.98056	-5.98056	-5.98056	-5.98056	-5.98056	-7.38352	-3.7943	-7.38352	-5.40296	-7.38352	-4.63011	-4.30941	-7.38352	-4.75122	-7.38352
MGC109340	X	gene	106598456	106598998	-	1	ensembl	protein_coding	3.98714	4.21728	3.7769	3.00937	2.96952	3.90175	3.82337	3.90011	3.78379	4.00068	4.02226	4.06958	3.85156	3.96705	2.86778	3.00218	3.95527	3.8724	3.94266	3.81916
Eif5b	9	gene	44354656	44409587	+	4	ensembl	protein_coding	5.92229	6.10644	6.04405	4.9233	5.5115	6.36453	6.19173	6.17243	6.18353	6.75487	5.87836	6.7376	6.03782	6.06401	5.03051	5.64471	6.37572	6.13447	6.10503	6.16644
LOC498675	8	gene	116518983	116523598	+	1	ensembl	protein_coding	-2.56093	-0.682221	-1.07718	-1.77326	-4.16067	-1.26964	-1.26403	-1.33328	-2.47898	-1.22857	-2.44775	-1.01272	-0.741498	-1.2674	-1.58535	-3.83109	-1.49587	-1.30678	-1.49123	-2.64907
Olr327	1	gene	235672961	235673926	-	2	ensembl	protein_coding	-6.28791	-3.68056	-6.28791	-6.28791	-6.28791	-6.28791	-6.28791	-6.28791	-6.28791	-6.28791	-7.2247	-7.2247	-3.68203	-5.08681	-7.2247	-5.03209	-7.2247	-5.19731	-5.14997	-7.2247
Prpf18	17	gene	79256708	79287301	+	5	ensembl	protein_coding	5.20439	5.34129	5.50224	4.21204	4.45018	5.48491	5.64307	5.57565	5.32445	5.63963	5.16119	5.56319	5.27149	5.55437	4.34398	4.48718	5.49186	5.64346	5.57105	5.29007
Bag6	20	gene	7198938	7211343	+	7	ensembl	protein_coding	7.27642	7.23426	7.23605	5.97495	6.2089	7.27698	7.49094	7.43074	7.40079	7.47059	7.27945	7.40385	7.17425	7.23358	6.08295	6.2951	7.29376	7.46513	7.40927	7.36325
Atp6v0b	5	gene	140507405	140508839	-	6	ensembl	protein_coding	6.83385	6.62679	6.76636	5.82987	5.79091	6.49374	6.8221	6.97142	6.85316	7.21204	6.84975	7.17448	6.57312	6.76305	5.98955	5.859	6.43969	6.76326	6.94544	6.8429
Bri3	12	gene	14374635	14383317	-	6	ensembl	protein_coding	4.78154	4.8682	4.95431	3.9005	4.22735	4.7134	5.13023	5.10019	5.01308	5.48314	4.72307	5.43053	4.82079	4.96271	4.03479	4.41122	4.61839	5.09179	5.06477	5.01389
Ncam2	11	gene	24122738	24352502	+	6	ensembl	protein_coding	3.87928	4.22481	4.29177	2.51093	3.53786	4.46623	3.70677	4.12055	4.02111	4.34238	3.88208	4.21811	4.21671	4.35209	2.57659	3.66869	4.53415	3.58538	4.10817	3.95971
Hsbp1l1	18	gene	72054143	72059978	+	1	ensembl	protein_coding	-2.74887	-2.80241	-3.49852	-3.18055	-2.77647	-3.07963	-3.0741	-1.93582	-4.32377	-3.03915	-2.87384	-3.30112	-2.97697	-3.14024	-3.03497	-2.37289	-2.83721	-3.28159	-2.06047	-4.58
LOC290876	16	gene	80790213	80802378	-	4	ensembl	protein_coding	-3.64128	-3.84441	-4.86152	-2.80937	-4.98512	-4.1193	-4.11384	-3.17793	-3.1817	-4.89758	-4.10819	-2.82231	-3.03029	-6.28756	-3.91885	-3.94924	-4.07836	-4.12544	-4.07495	-3.23686
Tmem127	3	gene	126202793	126215584	+	4	ensembl	protein_coding	6.72244	6.71736	6.55626	5.45008	5.55431	6.69723	6.86917	6.74819	6.60095	6.85815	6.73081	6.78376	6.6952	6.55427	5.54123	5.62758	6.70028	6.85196	6.72815	6.56091
Cdipt	1	gene	205389729	205393866	+	3	ensembl	protein_coding	7.14052	7.02729	7.02703	5.85082	6.02058	6.83001	7.12244	7.18978	7.11818	7.40586	7.16314	7.3468	6.9917	7.03604	5.96643	6.09964	6.78404	7.07164	7.17113	7.10196
Ren	13	gene	55555583	55567010	-	4	ensembl_havana	protein_coding	-0.0802688	-0.114424	0.697985	-1.1046	-1.19487	0.686179	0.619754	-1.07806	0.905737	-0.00599456	0.285841	-0.123598	-0.0249428	0.547325	-1.40344	-1.22835	0.509507	0.633446	-0.56684	0.702493
Kremen2	10	gene	12896141	12900598	-	3	ensembl	protein_coding	-5.74857	-5.74857	-5.74857	-5.74857	-5.74857	-5.74857	-2.87992	-3.60812	-2.8358	-5.74857	-7.944	-5.61951	-4.41575	-4.58059	-5.37823	-5.41115	-4.66579	-4.17005	-3.70114	-3.67763
Aldh1a1	1	gene	245521322	245562969	+	6	ensembl	protein_coding	4.60083	4.86826	5.01727	4.33818	2.74555	5.1734	4.95599	4.80635	4.48332	5.43907	4.54333	5.39767	4.84416	5.02736	4.60354	2.72991	5.21777	4.91182	4.73689	4.41575
Serinc5	2	gene	41398821	41516426	+	4	ensembl	protein_coding	6.11	6.91542	6.63389	5.42595	5.4635	7.01344	6.83613	6.58274	6.6446	6.54123	6.02407	6.39696	6.93267	6.64997	5.56884	5.54865	7.07832	6.81947	6.52478	6.62317
Gapdh	4	gene	224693580	224697455	-	6	ensembl	protein_coding	8.93455	8.77038	8.68736	7.81212	7.75149	8.48915	8.82391	8.93064	8.87653	9.24191	8.97982	9.1675	8.73394	8.64573	8.00702	7.78726	8.41159	8.79962	8.90821	8.87733
Olr1633	15	gene	31484022	31485008	-	1	ensembl	protein_coding	-6.81374	-6.81374	-6.81374	-6.81374	-6.81374	-6.81374	-6.81374	-6.81374	-6.81374	-6.81374	-6.81374	-6.81374	-6.81374	-6.81374	-6.81374	-6.81374	-6.81374	-6.81374	-6.81374	-6.81374
Ntn3	10	gene	13393760	13396856	-	3	ensembl	protein_coding	3.38708	2.49597	3.10666	1.795	1.73893	2.95587	3.32178	2.96422	3.15161	3.44907	3.43861	3.37399	2.42568	3.08466	1.89515	1.82475	2.95634	3.30693	2.92233	3.13775
Fbxo8	16	gene	36936326	36981671	-	6	ensembl	protein_coding	2.94522	3.1045	2.94978	1.87017	2.14884	3.27195	3.02961	2.87196	2.8816	3.2658	2.97214	3.16152	3.11348	2.95204	2.02423	2.24929	3.33169	2.954	2.76266	2.81837
Clec7a	4	gene	211859715	211870886	-	5	ensembl	protein_coding	-6.68877	-6.68877	-0.194439	-6.68877	-4.57223	0.581393	-0.138322	-2.51378	-0.678288	-0.337981	-6.69151	-0.194008	-6.69151	0.23722	-6.69151	-6.69151	0.986105	0.133015	-2.113	-0.203245
Epn2	10	gene	47567991	47646897	-	7	ensembl	protein_coding	6.91683	7.06779	6.93988	5.69009	6.01022	7.04921	7.23544	7.08791	7.01769	7.0745	6.88208	7.0624	6.93255	6.96577	5.8734	6.07884	7.04635	7.1591	7.07956	7.0095
Gpr89b	2	gene	218485504	218523850	-	6	ensembl	protein_coding	4.27604	4.29018	4.14396	2.98938	3.13468	4.23572	4.34163	4.41012	4.2413	4.31609	4.31177	4.19703	4.26229	4.18595	3.09372	3.16854	4.2582	4.29025	4.39836	4.21299
Olr833	5	gene	63722490	63723440	-	3	ensembl	protein_coding	-4.488	-4.22044	-3.10149	-3.77074	-6.59855	-4.46126	-6.59855	-6.59855	-6.59855	-6.59855	-4.67437	-6.95891	-4.42428	-3.16367	-3.60119	-6.95891	-4.6431	-4.69245	-6.95891	-6.95891
Ints4	1	gene	168654458	168718199	+	5	ensembl	protein_coding	4.24236	4.54108	4.2058	3.0917	3.00752	4.406	4.55938	4.38186	4.32059	4.38328	4.24363	4.25777	4.54432	4.20235	3.22402	3.04033	4.42905	4.53311	4.36343	4.30158
Cldn5	11	gene	89458886	89459542	-	1	ensembl	protein_coding	5.19947	4.91786	4.93862	3.97311	3.8285	5.26601	5.29668	5.22566	5.1432	5.61357	5.16108	5.50073	4.6811	5.07351	4.15929	3.77885	5.32925	5.368	5.20469	5.14617
Klf7	9	gene	71832274	71832558	+	1	ensembl	protein_coding	2.04004	2.24747	2.18105	1.0637	1.23156	2.14696	2.1916	2.29653	2.25537	2.14434	2.18698	1.93059	2.45261	1.84492	1.54125	0.649414	2.38512	2.13656	2.36385	2.30732
Gp1bb	11	gene	89621049	89622160	+	1	ensembl	protein_coding	3.62886	3.97147	4.32075	2.76926	3.43842	4.05692	4.30551	4.48609	4.19018	4.29255	3.59175	4.13705	3.8323	4.33579	2.94307	3.57699	4.04618	4.34524	4.44319	4.20845
Elac2	10	gene	51236364	51259151	+	4	ensembl	protein_coding	5.22282	5.0995	5.16755	3.96575	4.0449	5.08643	5.27039	5.28761	5.15569	5.45917	5.23832	5.38028	5.06019	5.17408	4.08779	4.10959	5.049	5.23979	5.28217	5.13859
Ube2c	3	gene	167422569	167424969	+	5	ensembl	protein_coding	-2.58261	-4.08601	-1.15529	-3.59139	-3.0071	-2.23606	-2.93749	-2.8821	-1.69956	-3.44306	-2.99315	-2.33537	-6.61777	-1.86465	-3.13851	-2.54122	-2.26323	-1.63282	-2.68066	-1.55329
Ankrd37	16	gene	49189582	49192471	+	3	ensembl	protein_coding	0.476783	0.855809	0.967259	0.470654	0.720415	1.15485	0.839119	1.46939	1.48223	1.29406	0.406061	1.1831	0.775146	0.913075	0.779052	0.902654	1.15838	0.776023	1.42598	1.4111
Sarm1	10	gene	65877570	65901277	+	5	ensembl	protein_coding	5.03524	4.76629	4.8752	3.50508	3.43982	4.74414	4.97013	4.83312	4.79739	4.86719	5.08355	4.76547	4.72207	4.88237	3.61915	3.50179	4.73699	4.94455	4.80669	4.77098
Olr771	3	gene	109455289	109456233	+	2	ensembl	protein_coding	-4.20342	-6.42434	-6.42434	-6.42434	-6.42434	-4.17528	-6.42434	-6.42434	-6.42434	-6.42434	-4.1994	-5.02969	-7.13289	-4.89836	-7.13289	-7.13289	-4.96771	-5.01385	-7.13289	-7.13289
Cpeb1	1	gene	144114219	144199174	-	6	ensembl	protein_coding	4.98959	5.03841	4.60829	3.42449	3.30395	4.92336	4.7556	4.72802	4.66688	4.81585	5.04352	4.66308	5.08289	4.57969	3.53353	3.35976	4.95624	4.70265	4.67852	4.65458
Lin28a	5	gene	155921629	155935517	-	2	ensembl	protein_coding	-2.03759	-0.525206	-1.90411	-3.05807	-1.93661	-2.00031	-1.86037	-1.79991	-1.76225	-2.0481	-2.34935	-4.35799	-2.12947	-1.49615	-0.92747	-0.33855	-2.32186	-1.61712	-1.09277	-2.30178
Pdk2	10	gene	82650223	82663773	-	5	ensembl	protein_coding	7.46134	7.29874	7.30498	6.15518	6.2239	7.21781	7.48221	7.43581	7.46132	7.67819	7.50911	7.50236	7.23904	7.37941	6.28532	6.19942	7.26808	7.53409	7.3866	7.41605
Dhx58	10	gene	88393941	88405108	-	4	ensembl	protein_coding	1.07898	1.31164	1.7754	0.178409	-0.100143	2.18216	2.60435	1.41179	1.25266	2.08035	0.970398	2.02197	1.23571	1.79191	0.330391	-0.0639982	2.28793	2.67064	1.34846	1.18217
RGD1565355	4	gene	14187861	14216208	+	7	ensembl_havana	protein_coding	-5.72843	-5.72843	-5.72843	-5.72843	-5.72843	-3.45685	-5.72843	-3.40541	-5.72843	-3.41989	-3.43993	-4.85398	-4.56183	-7.71788	-5.42278	-7.71788	-4.78549	-3.98062	-4.28521	-3.61555
Trip6	12	gene	24466257	24470664	+	2	ensembl_havana	protein_coding	1.5962	1.88437	2.24521	0.781692	1.02613	2.31433	2.38186	2.29857	2.16411	2.60279	1.50195	2.53633	1.86092	2.28559	0.894113	1.13246	2.33052	2.33655	2.29287	2.12396
Sdr16c6	5	gene	21748772	21770996	-	3	ensembl	protein_coding	-4.24049	-6.54481	-6.54481	-6.54481	-6.54481	-6.54481	-6.54481	-6.54481	-6.54481	-6.54481	-4.20055	-7.01892	-7.01892	-4.87208	-7.01892	-7.01892	-4.93871	-7.01892	-7.01892	-7.01892
Xrcc6	7	gene	123244581	123265278	+	6	ensembl	protein_coding	3.39711	3.58176	3.43829	2.6313	2.53606	3.84717	3.65677	3.4333	3.33547	3.68472	3.40793	3.5915	3.57373	3.38905	2.80919	2.58924	3.88214	3.62534	3.38134	3.29247
Actn2	17	gene	68050946	68143522	-	6	ensembl	protein_coding	5.00967	4.98742	4.97321	3.89712	3.69563	4.7865	5.13278	5.0226	4.66673	5.04066	5.07089	5.0042	4.97991	4.97341	3.97634	3.72386	4.80406	5.10091	4.98071	4.598
Mansc1	4	gene	232645471	232657452	-	5	ensembl	protein_coding	2.1456	2.59588	2.3827	1.40522	1.37855	2.66233	2.66812	2.66212	2.51469	2.8155	2.05213	2.76249	2.60402	2.36762	1.50356	1.42241	2.7457	2.63393	2.61361	2.52524
Ift27	7	gene	119384971	119401297	-	5	ensembl	protein_coding	3.47333	3.52442	3.71326	2.49115	2.3623	3.64014	3.76423	3.86924	3.82656	4.05926	3.44909	4.00993	3.43474	3.75047	2.69131	2.36596	3.63195	3.72653	3.84923	3.81469
Pex1	4	gene	27562607	27601351	-	4	ensembl	protein_coding	3.83377	4.08351	3.87925	2.79394	2.92719	4.02668	4.01581	3.9519	3.86654	3.93559	3.82667	3.82205	4.06431	3.87461	2.92491	3.00771	4.06262	3.96696	3.91644	3.84791
Btnl5	20	gene	4821316	4830921	-	1	ensembl	protein_coding	-5.7109	-5.7109	-5.7109	-5.7109	-5.7109	-3.32882	-5.7109	-5.7109	-5.7109	-5.7109	-7.66683	-4.93847	-4.17939	-4.32484	-5.48035	-7.66683	-5.62758	-3.61067	-5.62444	-5.60748
Cnga1	14	gene	37966491	37981839	+	3	ensembl	protein_coding	-6.15682	-6.15682	-6.15682	-3.88579	-6.15682	-6.15682	-6.15682	-6.15682	-6.15682	-6.15682	-4.54288	-5.32977	-7.32303	-5.20531	-5.12288	-7.32303	-7.32303	-5.31476	-7.32303	-4.48942
Traf7	10	gene	13691946	13701566	-	6	ensembl	protein_coding	5.00153	4.96509	5.23437	4.04777	4.0778	5.11881	5.41029	5.22015	5.08046	5.3543	5.01139	5.22698	4.86805	5.25991	4.10682	4.15315	5.18702	5.39207	5.23294	5.07224
Mir711	8	gene	117063312	117063379	+	1	ensembl	miRNA	-6.81374	-6.81374	-6.81374	-6.81374	-6.81374	-6.81374	-6.81374	-6.81374	-6.81374	-6.81374	-6.81374	-6.81374	-6.81374	-6.81374	-6.81374	-6.81374	-6.81374	-6.81374	-6.81374	-6.81374
Ccdc116	11	gene	91147684	91150766	+	4	ensembl	protein_coding	-2.0717	-0.715244	-1.33081	-2.36121	-1.59987	-1.4112	-1.07872	-1.63196	-1.48966	-1.64758	-1.99856	-1.54944	-0.680554	-1.36041	-1.73617	-1.59388	-1.45971	-1.26441	-1.95196	-1.74286
Wars	6	gene	141941104	141972286	-	6	ensembl	protein_coding	6.4718	6.54274	6.44948	5.45967	5.44551	6.35463	6.61293	6.53432	6.50508	6.66551	6.53105	6.6224	6.52955	6.42935	5.54368	5.48159	6.36278	6.56726	6.49073	6.48328
Tbca	2	gene	43661375	43671792	+	1	ensembl	protein_coding	4.23779	4.49924	3.82352	3.06589	3.07103	4.01078	4.15783	4.20763	4.20907	4.51978	4.27544	4.39839	4.50541	3.70063	3.23006	3.20048	3.97234	4.07453	4.23248	4.2128
Ttc8	6	gene	132140830	132207106	+	6	ensembl	protein_coding	2.2873	2.71839	2.66484	1.21038	1.90875	2.39468	2.77625	2.7304	2.53744	2.6461	2.26842	2.47156	2.76204	2.69768	1.27663	1.96361	2.41612	2.7084	2.75569	2.55439
Prelid1	17	gene	11943925	11946983	-	7	ensembl_havana	protein_coding	6.89513	6.75919	6.6981	5.76595	5.79993	6.59921	6.97483	7.01738	6.89154	7.19949	6.90469	7.15558	6.73614	6.66743	5.90832	5.88674	6.53187	6.93264	6.99782	6.87953
Tspan8	7	gene	58821747	58854524	+	5	ensembl	protein_coding	0.439526	0.502066	-0.192607	-1.1698	-0.925973	0.569664	0.511441	-0.278972	0.183724	0.295828	0.515317	0.170069	0.612501	-0.254743	-0.939036	-0.978553	0.685795	0.422357	-0.407812	0.109006
Zfp799	7	gene	15224533	15230625	-	4	ensembl	protein_coding	2.74075	2.90741	2.59995	1.60925	1.92151	2.89876	2.93142	2.84966	2.82208	2.87394	2.67774	2.68291	2.95923	2.57927	1.87832	1.81962	2.97818	2.98525	2.80131	2.79289
Acly	10	gene	88185495	88236092	-	7	ensembl	protein_coding	7.28339	7.15474	6.98866	5.82504	5.90007	6.95052	7.17637	7.19411	7.09704	7.06633	7.32842	6.95019	7.1432	7.01634	5.92939	5.97301	6.94385	7.13077	7.15996	7.06116
Fra10ac1	1	gene	264362189	264394030	-	5	ensembl	protein_coding	2.8248	3.32891	3.08727	2.17764	3.07417	3.34577	3.33817	3.42611	3.42672	3.70772	2.75897	3.63786	3.25495	3.05373	2.29685	3.34051	3.34488	3.25261	3.39586	3.40107
Lpar2	16	gene	21259278	21262902	-	6	ensembl	protein_coding	-4.49709	-4.18225	-3.46945	-5.39558	-4.52456	-2.44437	-2.78675	-1.9793	-4.41168	-4.42412	-5.87536	-5.87536	-3.53993	-2.87624	-5.87536	-3.61684	-2.95221	-3.00301	-1.57206	-2.92878
Dcc	18	gene	65693812	66392627	-	4	ensembl	protein_coding	4.82459	4.93204	4.77811	3.61564	3.79689	4.80973	4.8463	4.61618	4.64791	4.48093	4.82137	4.32185	4.99481	4.8076	3.77413	3.87443	4.80973	4.81948	4.50264	4.62224
Anks3	10	gene	9575751	9596420	+	5	ensembl	protein_coding	4.96897	5.01325	4.93236	3.88001	3.78615	4.99721	5.22761	5.01784	4.96136	5.25059	4.97929	5.14041	4.99742	4.95165	3.99105	3.84194	5.0226	5.21417	4.96195	4.93487
Ms4a1	1	gene	234494130	234506331	-	6	ensembl	protein_coding	-6.21245	-6.21245	-6.21245	-6.21245	-6.21245	-6.21245	-6.21245	-6.21245	-6.21245	-6.21245	-7.22494	-4.65733	-5.12451	-7.22494	-5.16728	-7.22494	-3.8258	-7.22494	-7.22494	-7.22494
Cd72	5	gene	63468973	63476331	-	6	ensembl	protein_coding	-1.56813	-1.51625	-2.23044	-2.76597	-1.99088	-1.03509	-0.807968	-1.47202	-1.39278	-1.05168	-1.79356	-1.59153	-0.717697	-1.96895	-2.24252	-2.79378	-0.366273	-1.02642	-1.30408	-2.02641
LOC100362783	12	gene	23760929	23767105	-	1	ensembl	protein_coding	-0.335759	-0.756336	-0.861688	-1.7643	-1.43664	0.0844314	-0.0893846	-0.362805	-0.306224	-0.442401	-0.389521	-0.571969	-0.617041	-0.999106	-1.71575	-1.28219	0.148965	-0.228481	-0.481231	-0.134779
Casp8ap2	5	gene	52451857	52489179	+	6	ensembl	protein_coding	1.94784	2.47799	2.34316	0.706344	1.58202	2.41275	2.35721	2.14259	2.30403	2.69694	1.87541	2.58573	2.54323	2.33754	0.735727	1.72851	2.47232	2.30159	2.09816	2.29267
Tmem86a	1	gene	104238667	104243015	+	5	ensembl	protein_coding	2.8551	2.58332	2.90877	1.2084	1.77351	3.07187	3.32606	2.98905	3.02069	3.26112	2.84823	3.20547	2.48682	2.90022	1.31551	1.88004	3.10466	3.34699	2.92196	2.98798
Mir291b	1	gene	63524193	63524300	-	2	ensembl	miRNA	-6.81374	-6.81374	-6.81374	-6.81374	-6.81374	-6.81374	-6.81374	-6.81374	-6.81374	-6.81374	-6.81374	-6.81374	-6.81374	-6.81374	-6.81374	-6.81374	-6.81374	-6.81374	-6.81374	-6.81374
Camk1	4	gene	208586463	208596796	-	4	ensembl	protein_coding	4.97286	4.88794	4.85092	3.7741	4.00423	4.7825	5.09179	5.06745	4.9673	5.34725	4.97211	5.27768	4.82899	4.86043	3.88598	4.11387	4.76126	5.07181	5.05514	4.91907
Ndrg1	7	gene	107683925	107725300	-	5	ensembl	protein_coding	6.4119	7.11959	6.93193	5.81079	5.93067	7.07616	6.91504	6.9369	6.92208	7.03937	6.32915	6.94734	7.12373	6.9547	5.94893	6.0228	7.11651	6.85483	6.89535	6.90108
Stat3	10	gene	88584612	88638724	-	5	ensembl	protein_coding	5.10977	5.51121	5.58035	4.28133	4.49742	5.71432	5.94748	5.51819	5.58175	5.76501	5.03117	5.67843	5.47878	5.6016	4.40248	4.58	5.74293	5.96343	5.45592	5.57208
Mex3c	18	gene	68695439	68717238	+	6	ensembl	protein_coding	3.89689	4.46811	3.96109	2.88645	3.4307	4.42602	4.3062	4.29376	4.07196	4.14406	3.8289	4.00306	4.48033	3.95032	2.98761	3.57419	4.47341	4.26972	4.28133	4.03638
Phkg1	12	gene	32392860	32406743	+	2	ensembl	protein_coding	1.27474	1.76722	1.76001	0.748094	0.435531	2.23804	2.23387	2.00893	1.61898	2.39504	1.13221	2.28253	1.75713	1.7842	0.827819	0.482585	2.34963	2.17434	2.01767	1.67234
Thnsl1	17	gene	89783177	89789609	+	4	ensembl	protein_coding	2.76892	3.07569	2.83962	1.81293	1.40479	2.74867	3.03835	2.89225	2.74845	2.94355	2.82198	2.83224	3.10262	2.84789	1.97334	1.42572	2.73506	2.99472	2.8388	2.70083
Postn	2	gene	163331262	163362444	+	6	ensembl	protein_coding	-1.82103	-2.65178	-3.62547	-3.77973	-2.12863	-2.42662	-2.06464	-2.01376	-2.01737	-1.31855	-1.66587	-1.81084	-2.68706	-2.44768	-4.27788	-2.04983	-2.73077	-2.60023	-2.07392	-1.50351
Slc21a4	4	gene	240471781	240511228	-	7	ensembl	protein_coding	-3.00348	-1.89653	-2.57794	-3.98455	-3.41631	-1.706	-1.6998	-2.14068	-4.67474	-1.52682	-1.29709	-1.46188	-0.903669	-1.96972	-6.33379	-2.78631	-2.92928	-2.98193	-3.41857	-2.54458
Trim27	17	gene	57844089	57856502	+	6	ensembl	protein_coding	4.9384	4.90293	4.88903	3.62406	3.89689	4.78436	5.14106	5.05969	4.85666	5.26847	4.91022	5.21996	4.84498	4.90224	3.73363	3.95783	4.77499	5.12669	5.03719	4.85382
Mrpl46	1	gene	141445111	141453185	-	5	ensembl	protein_coding	3.27095	3.29868	3.2974	2.26701	2.26373	3.45745	3.25803	3.52367	3.38031	3.637	3.27367	3.57117	3.22313	3.29185	2.38452	2.35409	3.48325	3.21128	3.48321	3.37807
Cyp7b1	2	gene	122442002	122610354	-	5	ensembl	protein_coding	4.093	4.60911	4.46625	3.22389	3.37173	4.84564	4.60007	4.2788	4.31386	4.67297	4.0344	4.58532	4.598	4.47331	3.33764	3.47954	4.91372	4.5891	4.18721	4.27708
Tfpt	1	gene	63155152	63164554	+	4	ensembl	protein_coding	3.56628	3.72328	3.55748	2.63798	2.74237	3.48267	3.65868	3.80632	3.75589	4.12402	3.56728	4.09835	3.71973	3.51203	2.79355	2.79121	3.46799	3.61097	3.75868	3.73516
Olr447	3	gene	79578989	79579933	+	1	ensembl	protein_coding	-5.76745	-5.76745	-5.76745	-5.76745	-5.76745	-5.76745	-5.76745	-5.76745	-5.76745	-5.76745	-4.92918	-4.96166	-5.42883	-5.5487	-7.52926	-7.52926	-5.61017	-5.65107	-5.60721	-4.87918
Chrm3	17	gene	65755434	65757203	-	1	ensembl	protein_coding	5.49684	5.30966	5.18521	4.11509	4.40891	5.43959	5.37918	5.35542	5.56481	5.62624	5.58579	5.47802	5.18972	5.28856	4.15204	4.41995	5.52919	5.46351	5.20168	5.57251
Thsd1	16	gene	74316449	74346243	-	6	ensembl	protein_coding	3.10737	2.91467	2.79902	1.49926	1.93699	2.89105	3.08909	3.0091	2.69068	3.10955	3.14776	2.99188	2.92544	2.80355	1.62277	1.98752	2.89381	3.07609	2.96098	2.63697
Axin2	10	gene	96933420	96959744	+	5	ensembl	protein_coding	3.14142	3.57129	3.54365	2.17658	2.67657	3.3844	3.71332	3.59726	3.20802	3.70854	3.04315	3.63319	3.53475	3.57777	2.29022	2.80886	3.41123	3.70819	3.56791	3.14578
LOC500227	4	gene	179443528	179449747	+	4	ensembl	protein_coding	3.23215	3.21918	3.16101	1.87215	2.14891	3.04946	3.51513	3.25534	3.16944	3.40238	3.27268	3.30289	3.18476	3.16703	1.99294	2.1772	3.08769	3.48272	3.22113	3.13611
Chmp4c	2	gene	113334160	113397419	-	5	ensembl	protein_coding	-3.48179	-2.00814	-1.85298	-5.44865	-5.44865	-1.66502	-1.92397	-5.44865	-1.87952	-2.22702	-4.37589	-1.85824	-1.96972	-2.32266	-5.72794	-3.35554	-2.42551	-2.49459	-3.88434	-2.96997
Olr112	1	gene	174860882	174861844	+	2	ensembl	protein_coding	-6.57829	-6.57829	-6.57829	-6.57829	-6.57829	-6.57829	-6.57829	-6.57829	-6.57829	-6.57829	-6.97475	-5.11059	-4.87432	-6.97475	-6.97475	-6.97475	-6.97475	-6.97475	-6.97475	-6.97475
Mapk9	10	gene	35114480	35145312	+	7	ensembl	protein_coding	5.7142	5.84062	5.55746	4.3637	4.63669	5.62395	5.62311	5.65575	5.58178	5.8076	5.7862	5.68499	5.8555	5.50886	4.54944	4.64437	5.64765	5.61057	5.55131	5.56597
Cbx2	10	gene	107745908	107754738	+	1	ensembl	protein_coding	0.504033	1.15077	1.0008	-0.272771	0.254045	0.891435	1.23703	1.62224	1.0457	0.508431	0.442098	0.463711	1.05251	0.977934	-0.165364	0.39401	0.984841	1.13084	1.62123	1.0399
Kng2	11	gene	84457798	84489268	-	5	ensembl	protein_coding	-6.77173	-3.61729	-4.58915	-6.77173	-3.44972	-2.52507	-3.38712	-3.33732	-2.98406	-2.71545	-6.70505	-1.82064	-3.23229	-3.39453	-4.17963	-3.32571	-6.70505	-3.53446	-4.34606	-2.90522
Olr750	3	gene	109083435	109084346	-	4	ensembl	protein_coding	-6.80077	-6.80077	-6.80077	-6.80077	-6.80077	-6.80077	-6.80077	-4.61507	-6.80077	-6.80077	-6.81414	-6.81414	-6.81414	-6.81414	-6.81414	-6.81414	-6.81414	-6.81414	-4.49477	-6.81414
Pola2	1	gene	228231867	228255908	-	4	ensembl	protein_coding	0.334102	0.68706	0.337605	-0.432865	-0.517257	0.596277	0.372219	0.713418	0.589207	0.833487	0.315246	0.689216	0.755892	0.412638	-0.262505	-0.526723	0.64923	0.250468	0.653925	0.575868
Glb1l2	8	gene	27827460	27872964	-	5	ensembl	protein_coding	-2.10125	-2.07398	-1.13155	-2.78107	-3.9559	-0.883168	-0.784229	-1.6009	-2.29064	-0.74895	-2.06701	-1.04112	-1.92277	-0.853075	-2.70637	-3.50858	-1.23565	-0.777801	-1.85872	-2.38054
Nme3	10	gene	14074396	14075352	+	2	ensembl	protein_coding	4.46822	4.49283	4.65373	3.61086	3.74853	4.55018	4.82417	4.84825	4.72459	5.04567	4.44389	4.9744	4.44312	4.62947	3.73176	3.84177	4.54993	4.8094	4.85434	4.68896
Sez6l	12	gene	51848836	51998895	+	5	ensembl	protein_coding	8.39844	8.46449	8.48697	7.03205	7.23212	8.28833	8.70227	8.59428	8.36554	8.22308	8.40853	8.05947	8.44703	8.51564	7.15324	7.29203	8.28349	8.70355	8.58249	8.34208
Hsd17b7	13	gene	92917716	92934194	-	4	ensembl	protein_coding	1.71247	1.42655	0.794246	0.10798	0.522696	1.49147	1.56218	1.33254	1.31296	1.45081	1.744	1.22055	1.54321	0.793065	0.379732	0.490334	1.64933	1.29318	1.23591	1.36459
Mrpl3	8	gene	112989706	113013066	+	5	ensembl	protein_coding	5.38896	5.43105	5.36132	4.36662	4.29339	5.50386	5.485	5.43208	5.42511	5.61688	5.39343	5.5264	5.39085	5.3775	4.50948	4.33833	5.53279	5.4406	5.38972	5.40516
Dcun1d5	8	gene	5444079	5465187	+	6	ensembl	protein_coding	3.77375	3.97636	3.89924	2.57833	2.96476	3.89929	3.8405	3.86106	3.87657	4.13808	3.75036	4.07941	3.94444	3.9254	2.71415	3.03292	3.93174	3.77128	3.82381	3.83444
Krit1	4	gene	27341835	27376376	-	6	ensembl	protein_coding	3.5046	3.85337	3.76567	2.65909	2.97339	3.95379	3.76287	3.62641	3.67166	4.00142	3.43534	3.93466	3.83789	3.81938	2.77246	3.08798	4.01044	3.70229	3.53752	3.63428
Nos1	12	gene	46049288	46209569	-	7	ensembl	protein_coding	4.37497	4.36001	4.11064	3.01452	2.92884	4.07591	4.57365	4.32818	4.17438	3.55265	4.40721	3.33899	4.3615	4.12844	3.1684	3.00883	4.05726	4.57934	4.28186	4.16191
Mtmr1	18	gene	337401	370993	-	6	ensembl	protein_coding	5.61003	5.73878	5.61411	4.58833	4.85307	5.64329	5.92613	5.90637	5.74227	5.85556	5.58279	5.75219	5.73564	5.59323	4.67985	4.9689	5.63242	5.91183	5.8953	5.72579
Tm4sf20	9	gene	88268849	88282366	-	5	ensembl	protein_coding	-4.28168	-3.2237	-6.35104	-4.33986	-6.35104	-2.14087	-4.25081	-3.43138	-4.21106	-2.60802	-4.84777	-3.05487	-3.11948	-7.20377	-3.74104	-4.67595	-2.39178	-3.98892	-3.37389	-4.79198
Paqr9	8	gene	102795907	102797028	+	2	ensembl	protein_coding	2.74752	2.81398	2.94139	1.61408	2.06258	2.91773	3.17385	3.09219	2.726	3.11177	2.72939	2.98655	2.49545	3.14572	1.6628	2.21021	2.8665	3.32822	3.03225	2.74401
RGD1561552	X	gene	79250647	79253375	-	2	ensembl	protein_coding	-6.45848	-6.45848	-6.45848	-6.45848	-6.45848	-6.45848	-6.45848	-6.45848	-6.45848	-6.45848	-5.1635	-7.05669	-7.05669	-7.05669	-4.99903	-5.02543	-7.05669	-7.05669	-7.05669	-7.05669
Krt72	7	gene	141180801	141190972	-	1	ensembl	protein_coding	-4.87913	-2.71264	-0.709399	-4.87913	-2.97741	-1.43861	-1.76135	-2.16633	-4.87913	-2.90035	-4.04324	-2.3145	-2.36003	-2.00661	-4.91429	-2.61851	-2.55092	-3.03914	-2.67342	-2.78282
Rpl8	7	gene	118499886	118501918	+	1	ensembl	protein_coding	6.63871	6.86525	7.06175	5.89065	5.96678	6.88485	7.18796	7.24613	7.07181	7.4192	6.63259	7.30993	6.82344	7.02118	6.04212	6.03178	6.97535	7.1653	7.20163	7.02977
MGC105649	3	gene	121310711	121314263	+	1	ensembl	protein_coding	-2.9551	-4.36957	-4.54675	-6.83053	-6.83053	-3.29466	-4.61388	-3.74901	-4.57191	-4.5828	-3.14494	-4.50347	-4.23143	-6.64993	-6.64993	-6.64993	-1.99037	-4.48731	-3.61901	-4.41843
Olr566	3	gene	82206761	82427757	+	1	ensembl	protein_coding	-6.5824	-6.5824	-6.5824	-6.5824	-6.5824	-6.5824	-6.5824	-6.5824	-6.5824	-6.5824	-6.97194	-5.10778	-6.97194	-6.97194	-6.97194	-4.94068	-6.97194	-6.97194	-6.97194	-6.97194
Glrb	2	gene	199178597	199251847	-	4	ensembl	protein_coding	5.51687	5.6936	5.50572	4.38821	4.63899	5.69607	5.54087	5.46237	5.56701	5.7746	5.55661	5.73781	5.71088	5.43235	4.50549	4.75552	5.66934	5.4506	5.46046	5.50525
LOC685964	4	gene	186758874	186763368	+	3	ensembl	protein_coding	-6.58888	-6.58888	-6.58888	-6.58888	-6.58888	-6.58888	-6.58888	-6.58888	-6.58888	-6.58888	-6.96751	-5.10334	-6.96751	-6.96751	-6.96751	-6.96751	-6.96751	-6.96751	-5.04545	-6.96751
Vrk3	1	gene	101820326	101847648	+	3	ensembl	protein_coding	4.90805	4.96642	4.94758	3.69439	3.8793	4.85268	5.1902	5.11807	5.03435	5.24942	4.89832	5.17812	4.93631	4.95106	3.79376	3.95164	4.83477	5.17979	5.09888	5.01783
Ckap4	7	gene	25084905	25093002	+	6	ensembl	protein_coding	2.92547	3.14676	3.12107	2.03397	1.79781	2.89209	3.41325	3.18582	3.01263	3.25855	2.92059	3.16819	3.12139	3.13296	2.19434	1.84272	2.85019	3.39491	3.16953	2.99261
Stag1	8	gene	108373849	108760291	+	6	ensembl	protein_coding	2.77717	3.22723	3.28923	1.88388	2.31316	3.39546	3.30059	3.19372	3.0431	3.3414	2.71512	3.22816	3.19597	3.33274	1.9925	2.44273	3.44993	3.28266	3.11023	3.0149
Mttp	2	gene	261907825	261948693	-	5	ensembl	protein_coding	-2.09175	-1.40505	-0.703416	-1.96641	-2.11947	-0.255301	-0.143962	-0.0903941	-0.732919	-0.0572768	-2.34745	-0.208383	-1.63105	-0.547216	-1.88567	-1.92406	-0.124121	-0.242241	-0.119616	-0.536147
Golga3	12	gene	54248805	54295058	-	2	ensembl	protein_coding	4.05485	4.13089	3.86022	2.76137	2.872	4.0984	4.23226	3.97157	3.89224	3.95097	4.06389	3.87594	4.06456	3.87952	2.81298	3.08438	4.16357	4.12567	3.86797	3.88629
Pkig	3	gene	166238136	166305338	+	5	ensembl	protein_coding	5.57824	5.85474	6.1494	4.76368	5.13977	6.02605	6.29806	6.2958	6.16484	6.33103	5.51264	6.24943	5.77553	6.15987	4.88467	5.24997	6.02979	6.30509	6.27546	6.15916
Mitd1	9	gene	44169745	44181035	-	6	ensembl	protein_coding	1.16172	1.4573	1.6995	0.557098	1.04777	1.38682	1.66602	1.49758	1.47655	1.97563	1.03866	1.93034	1.39063	1.75138	0.729972	1.13462	1.36334	1.6516	1.48314	1.45232
Nt5dc1	20	gene	42836806	42938666	-	6	ensembl	protein_coding	1.44028	1.74046	1.71385	0.784979	0.747863	1.86093	1.70823	1.80217	1.59249	2.17122	1.34974	2.09867	1.67769	1.79181	0.871176	0.89178	1.91877	1.72157	1.76166	1.4796
Il13ra2	X	gene	118588856	118658727	-	4	ensembl	protein_coding	-6.68348	-6.68348	-4.43199	-6.68348	-6.68348	-6.68348	-6.68348	-4.45363	-6.68348	-6.68348	-6.91181	-4.72508	-6.91181	-4.58854	-6.91181	-6.91181	-6.91181	-6.91181	-4.65718	-6.91181
Gon4l	2	gene	207538842	207612074	+	6	ensembl	protein_coding	4.83912	4.96051	4.87111	3.77469	3.83497	4.85666	5.04505	4.90139	4.77056	4.78764	4.8114	4.63109	4.99944	4.9134	3.89257	3.9418	4.86473	5.04111	4.85239	4.69378
Akr1a1	5	gene	139278242	139295142	-	4	ensembl	protein_coding	8.84855	8.77478	8.65431	7.78352	7.62192	8.63899	8.81435	8.86805	8.78542	9.12366	8.86569	9.0713	8.7158	8.65679	7.89667	7.67353	8.64348	8.77234	8.836	8.78195
Xkr7	3	gene	154913771	154936396	+	4	ensembl	protein_coding	-0.652036	-0.681769	-0.258083	-0.725264	-0.124116	-0.11417	0.0404958	0.387495	0.0900949	-0.656154	-0.741775	-0.710911	-0.778343	-0.203003	-0.492991	-0.0125352	-0.12897	-0.0898706	0.366961	0.0979292
Mto1	8	gene	85357705	85381270	+	3	ensembl	protein_coding	3.9057	4.08563	3.88242	2.91261	2.80405	3.89739	3.97616	3.92099	3.86388	4.0748	3.84962	3.98731	3.9612	4.03101	3.10933	2.83976	3.93163	3.84284	3.94513	3.82581
Extl1	5	gene	156370680	156385881	-	4	ensembl	protein_coding	5.25998	5.38622	5.37435	4.25333	4.42613	5.48422	5.84333	5.58857	5.64313	5.6691	5.22087	5.56194	5.34971	5.39354	4.36806	4.48295	5.48852	5.85597	5.55283	5.65399
Cd37	1	gene	102295449	102300642	-	6	ensembl	protein_coding	2.52037	2.06757	2.88973	0.997287	1.15627	3.11756	3.05459	2.67436	2.63226	3.155	2.49955	3.08089	1.91381	2.96439	1.1046	1.21276	3.1501	3.03829	2.66246	2.63815
Sugp1	16	gene	21016442	21047083	-	6	ensembl	protein_coding	4.95579	4.99168	5.12663	4.08387	4.19676	5.01	5.12838	5.38055	5.24554	5.4862	4.92764	5.42067	4.94781	5.1342	4.18967	4.25254	5.03803	5.17511	5.31842	5.20129
Mab21l2	2	gene	205250196	205251275	-	1	ensembl	protein_coding	-2.54481	-3.41755	-2.72143	-2.61922	-4.56474	-3.694	-3.1753	-3.63802	-4.46575	-6.7376	-2.53772	-6.68045	-3.44608	-2.41846	-2.9845	-6.68045	-3.16651	-2.85045	-3.16259	-3.6512
Olr235	1	gene	179048450	179049388	+	1	ensembl	protein_coding	-6.58852	-4.07636	-6.58852	-6.58852	-6.58852	-6.58852	-6.58852	-6.58852	-6.58852	-6.58852	-4.87044	-6.99681	-4.63766	-6.99681	-6.99681	-6.99681	-6.99681	-4.88727	-6.99681	-6.99681
Tfap2d	9	gene	24167386	24227618	+	5	ensembl	protein_coding	-6.69004	-6.69004	-6.69004	-6.69004	-6.69004	-6.69004	-6.69004	-6.69004	-4.39754	-6.69004	-6.90958	-6.90958	-6.90958	-6.90958	-6.90958	-4.6129	-6.90958	-6.90958	-6.90958	-4.71832
Inhbc	7	gene	70822285	70835753	-	4	ensembl	protein_coding	-3.60838	-2.52659	-5.72432	-3.66787	-5.72432	-2.29876	-5.72432	-3.53305	-3.53617	-5.72432	-2.37096	-3.83044	-3.89286	-4.5957	-7.83842	-4.52829	-3.18988	-4.1999	-2.96913	-4.6525
Osgepl1	9	gene	52711225	52762415	-	6	ensembl	protein_coding	1.67626	1.84608	2.23342	0.836154	0.659286	1.86854	1.78357	1.83646	1.83271	2.08626	1.66556	2.0193	1.85754	2.27514	0.910474	0.742456	1.88521	1.65731	1.84719	1.79854
Pm20d2	5	gene	53002968	53019197	-	5	ensembl	protein_coding	2.63097	2.93681	2.62677	1.62675	2.03499	2.98604	2.87531	2.92693	2.81361	2.91282	2.49772	2.94028	2.64456	2.64894	1.5253	2.17812	2.9963	2.93392	3.08293	2.92293
LOC360933	14	gene	41185952	41231346	+	2	ensembl	protein_coding	-0.406248	-0.400174	-0.49656	-1.65901	-1.21635	-1.1516	-0.835467	-0.645766	-0.782863	-0.228675	-0.597524	-0.475367	-0.602269	-0.392381	-1.34322	-2.21167	-0.185731	-0.178961	-0.900362	-0.935224
Tmem39b	5	gene	151617692	151634824	-	5	ensembl	protein_coding	2.67862	3.00813	3.03899	1.87282	1.92886	2.82684	3.16234	3.07895	3.04847	3.10439	2.58641	2.97403	2.96978	3.10185	2.08248	1.98217	2.8033	3.09402	3.12106	3.03331
Mir3554	5	gene	111183075	111183192	-	2	ensembl	miRNA	-6.57801	-6.57801	-6.57801	-6.57801	-6.57801	-6.57801	-6.57801	-6.57801	-6.57801	-6.57801	-6.97494	-6.97494	-6.97494	-6.97494	-6.97494	-4.94368	-6.97494	-6.97494	-6.97494	-5.03692
Pdk3	X	gene	63428816	63496239	-	6	ensembl_havana	protein_coding	4.27908	4.45295	4.06887	3.10278	3.18916	4.29553	4.17578	4.14193	4.15167	4.31195	4.34432	4.19786	4.44155	4.07258	3.204	3.28831	4.3163	4.11755	4.04988	4.13734
Olr135	1	gene	175271308	175272246	+	1	ensembl	protein_coding	-3.72852	-6.74012	-6.74012	-6.74012	-6.74012	-6.74012	-6.74012	-4.46577	-6.74012	-6.74012	-2.70138	-6.84576	-6.84576	-6.84576	-6.84576	-6.84576	-6.84576	-6.84576	-4.64784	-6.84576
Syf2	5	gene	157038590	157046520	+	6	ensembl	protein_coding	4.75014	5.02345	4.70321	3.73158	4.19815	4.99005	5.02892	4.95985	4.93954	5.26667	4.72262	5.20939	5.00203	4.66412	3.84026	4.31028	5.01848	4.98308	4.92561	4.91569
Gtpbp6	12	gene	54373862	54377736	+	1	ensembl	protein_coding	4.49468	4.28397	4.95094	3.74375	3.92812	4.37898	5.07617	5.21628	4.97242	5.13538	4.41664	5.11852	4.22171	4.96059	3.86176	4.03026	4.4518	5.02335	5.20682	4.88925
RGD1559683	6	gene	37117774	37136364	-	5	ensembl	protein_coding	-2.54165	-3.0603	-2.77316	-6.039	-3.36023	-1.4089	-2.02361	-1.78839	-3.26133	-2.47388	-2.79865	-2.55867	-3.26561	-3.45237	-3.94708	-3.37307	-1.10322	-2.29013	-1.81388	-4.12776
B4galt7	17	gene	11657452	11666049	-	5	ensembl	protein_coding	4.64999	4.31977	4.49947	3.41587	3.53119	4.47644	4.72615	4.73567	4.6048	4.85419	4.66474	4.77203	4.27233	4.50083	3.52327	3.60708	4.44168	4.69039	4.75327	4.58791
Prkag3	9	gene	81761758	81771204	-	5	ensembl	protein_coding	-2.87402	-4.99533	-4.99533	-4.99533	-4.99533	-4.99533	-4.99533	-2.7985	-4.99533	-4.99533	-3.63972	-4.64336	-3.34088	-5.40578	-6.17197	-5.33863	-3.78953	-5.54234	-4.00088	-3.76205
Ctsd	1	gene	222436922	222448798	-	6	ensembl	protein_coding	8.30193	8.10539	8.42096	7.01251	7.08253	8.52989	8.73047	8.37077	8.54966	8.83987	8.29281	8.78103	8.02615	8.43744	7.12509	7.12882	8.55458	8.7285	8.31932	8.55025
Tmprss4	8	gene	48096487	48129085	-	4	ensembl	protein_coding	-3.3638	-3.08788	-2.80069	-3.42581	-3.38787	-6.06721	-3.33103	-4.02561	-3.28895	-2.01728	-3.12568	-2.29202	-3.2436	-3.43028	-2.86252	-3.96445	-4.1341	-3.5919	-5.09826	-3.05332
Ubtf	10	gene	90038146	90051350	-	7	ensembl	protein_coding	5.75314	6.08804	5.92722	4.78971	5.23727	5.89198	6.10441	6.0948	5.97621	6.28811	5.66816	6.16852	6.04602	5.94147	4.9557	5.32987	5.85806	6.09786	6.13697	5.94828
Pdcd5	1	gene	93093134	93098267	-	1	ensembl	protein_coding	3.71992	3.95642	3.86881	2.68767	3.02724	4.07746	3.96198	3.89242	3.93188	4.42366	3.71585	4.25169	3.94283	3.8202	2.80036	3.14736	4.12579	3.90614	3.88002	3.95721
Mir205	13	gene	116787618	116787725	-	1	ensembl	miRNA	-6.81374	-6.81374	-6.81374	-6.81374	-6.81374	-6.81374	-6.81374	-6.81374	-6.81374	-6.81374	-6.81374	-6.81374	-6.81374	-6.81374	-6.81374	-6.81374	-6.81374	-6.81374	-6.81374	-6.81374
Notch3	7	gene	14294587	14345774	-	5	ensembl	protein_coding	4.09635	3.71022	3.5115	2.47818	2.09976	3.82636	4.14762	3.97293	3.74826	3.66921	4.15398	3.51374	3.66917	3.47831	2.56923	2.22609	3.8452	4.12998	3.93	3.7447
Ebna1bp2	5	gene	141456542	141461221	+	2	ensembl_havana	protein_coding	3.62313	3.67016	3.7723	2.56005	2.58254	3.68936	3.66096	3.82179	3.57969	4.02198	3.52454	3.97909	3.6945	3.72146	2.64319	2.7788	3.67393	3.70098	3.72369	3.54179
Dagla	1	gene	233241963	233298558	-	2	ensembl	protein_coding	8.16652	8.29494	8.40411	7.0953	7.57804	8.43155	8.60847	8.68022	8.58126	8.57189	8.12506	8.4648	8.24277	8.40827	7.18975	7.69459	8.43398	8.58044	8.67871	8.59394
Cldn18	8	gene	107358630	107376300	-	4	ensembl	protein_coding	-3.66117	-3.40017	-5.72001	-5.72001	-5.72001	-5.72001	-5.72001	-1.98042	-5.72001	-2.82994	-3.7486	-3.47149	-4.42495	-4.02891	-5.39371	-3.22149	-3.71006	-7.97622	-4.67249	-5.54386
Plec	7	gene	117215919	117275610	-	6	ensembl	protein_coding	5.45434	5.52514	5.81204	4.40082	4.36278	6.09077	6.06406	5.7494	5.50682	5.71547	5.44767	5.60339	5.42178	5.80879	4.52739	4.53589	6.12166	6.08926	5.58799	5.53779
Olr1614	15	gene	31144626	31145564	+	2	ensembl	protein_coding	-4.41556	-3.30562	-4.31646	-6.58655	-6.58655	-6.58655	-6.58655	-6.58655	-6.58655	-6.58655	-3.96227	-6.97922	-3.69604	-4.68112	-6.97922	-6.97922	-3.92871	-6.97922	-6.97922	-6.97922
RT1-DOa	20	gene	5968763	5971742	+	3	ensembl	protein_coding	-3.79956	-2.773	-3.7079	-3.11718	-3.82151	-5.80745	-2.55159	-5.80745	-2.97779	-3.74104	-3.19917	-3.58045	-3.64864	-3.39971	-4.3046	-5.29127	-5.43857	-2.70968	-2.6395	-3.89286
Prl7a4	17	gene	40954515	40963575	+	3	ensembl_havana	protein_coding	-6.12629	-6.12629	-6.12629	-6.12629	-6.12629	-6.12629	-6.12629	-6.12629	-6.12629	-6.12629	-4.23984	-5.4197	-5.18343	-7.28386	-7.28386	-7.28386	-4.65485	-7.28386	-7.28386	-5.34584
Pnrc1	5	gene	53083526	53086483	-	5	ensembl	protein_coding	4.73845	4.65218	4.84334	3.73541	3.97361	4.8952	4.92952	4.79693	4.86307	5.13264	4.73748	5.05997	4.58927	4.86392	3.88431	3.99523	4.92308	4.87314	4.74766	4.88627
Acot2	6	gene	118076658	118083477	-	5	ensembl	protein_coding	3.1789	3.21446	3.08923	1.98415	2.01599	3.23757	3.12394	3.11249	3.2554	3.4218	3.19261	3.37557	3.08839	3.08672	2.09767	2.09307	3.21356	3.18888	3.01736	3.28012
Gss	3	gene	157443739	157474042	-	2	ensembl	protein_coding	2.67226	3.19462	3.01717	1.91985	2.17559	2.94541	3.31611	3.27585	3.11361	3.15426	2.59295	3.05135	3.15225	3.04071	2.01719	2.31904	2.89401	3.31263	3.28263	3.12199
Cachd1	5	gene	123487662	123714027	+	6	ensembl	protein_coding	5.40804	5.08416	4.96919	3.88632	3.59719	5.08138	5.07989	4.87721	5.21856	5.2092	5.47518	5.06084	5.04276	5.03012	4.07158	3.60886	5.11378	5.02682	4.76103	5.22019
Calr	19	gene	36931420	36937294	-	5	ensembl	protein_coding	8.6518	8.77357	8.62065	7.68818	7.75209	8.70365	8.89906	8.82843	8.73321	8.97958	8.63849	8.89538	8.7527	8.6114	7.82098	7.82073	8.70168	8.87745	8.79794	8.71347
Cd300a	10	gene	103094716	103107421	+	5	ensembl	protein_coding	0.957144	0.819028	2.02891	-0.35024	-0.922115	2.26279	2.11835	1.34187	1.54771	1.76694	1.09522	1.72349	0.833593	1.96446	-0.326016	-1.03709	2.44569	2.04676	1.30536	1.5189
Fabp3	5	gene	152246244	152253006	+	4	ensembl	protein_coding	3.44925	3.62039	3.24216	2.74735	2.55471	2.79122	3.56128	3.54336	3.4311	3.80992	3.42191	3.73215	3.54268	3.26633	2.96201	2.67106	2.69238	3.52289	3.48839	3.45094
Rps27	2	gene	209004975	209006077	-	3	ensembl	protein_coding	5.34501	5.50837	5.24876	4.33056	4.22817	5.32789	5.72847	5.53195	5.53632	5.85694	5.31914	5.86885	5.42213	5.25768	4.4546	4.25335	5.34822	5.69	5.53708	5.49138
Pklr	2	gene	207865576	207874393	+	5	ensembl	protein_coding	0.198836	0.708339	-0.381675	-1.58994	-0.168737	-0.200011	-0.10028	0.274909	0.306268	0.240042	1.08547	0.401073	0.0397785	-0.00954924	-1.14384	-0.197201	-1.0867	0.252247	0.0188969	-0.0724198
Gnpda2	14	gene	62731015	62749014	-	6	ensembl	protein_coding	2.20936	2.26107	2.2811	0.750514	1.58876	2.33932	2.21275	2.27341	2.32059	2.42708	2.23156	2.13294	2.17227	2.38675	0.893654	1.82106	2.29889	2.13027	2.27902	2.31755
Gabrg2	10	gene	26937103	27023929	-	5	ensembl	protein_coding	5.35834	5.62168	5.47223	4.24513	4.48683	5.45933	5.41798	5.38689	5.27166	5.34181	5.37399	5.20228	5.63177	5.50103	4.36548	4.58972	5.48352	5.3533	5.34367	5.21714
Pdlim1	1	gene	266752410	266800857	-	3	ensembl	protein_coding	1.29369	2.21183	1.8285	0.800516	0.993014	2.1027	1.99949	2.17201	2.08248	2.08076	1.18246	1.9932	2.25898	1.83107	0.927566	1.05909	2.141	1.96528	2.13373	2.0726
Mir292	1	gene	63524481	63524562	-	1	ensembl	miRNA	-6.69612	-6.69612	-6.69612	-6.69612	-6.69612	-6.69612	-6.69612	-6.69612	-6.69612	-6.69612	-6.89417	-6.89417	-6.89417	-4.91361	-6.89417	-6.89417	-6.89417	-6.89417	-6.89417	-6.89417
Ubd	20	gene	3917783	3919728	-	5	ensembl	protein_coding	-2.8891	-3.8765	-4.04426	-3.43587	-6.20661	-6.20661	-3.33645	-6.20661	-6.20661	-6.20661	-3.61782	-5.08776	-4.7934	-4.04973	-3.94362	-3.97988	-7.41023	-4.19178	-4.13076	-7.41023
Tmem88b	5	gene	176705977	176708801	-	2	ensembl	protein_coding	4.1465	4.71622	4.53034	3.1741	3.67411	4.75997	4.69627	4.6346	4.65905	4.81856	4.06584	4.73495	4.72983	4.53585	3.2732	3.77758	4.81003	4.64305	4.60697	4.63241
Sh3bgr	11	gene	40086028	40106740	+	5	ensembl	protein_coding	0.427373	0.588509	0.893021	-0.312928	0.0394617	1.04742	1.11962	0.782918	0.568908	1.0738	0.737443	0.938885	0.74902	0.868508	-0.684001	0.33609	0.989489	0.927603	0.855481	0.509583
Stpg2	2	gene	263050120	263576773	+	4	ensembl	protein_coding	-2.6009	-3.94162	-3.33037	-4.26226	-6.27425	-6.27425	-2.2863	-2.23533	-3.35679	-2.2512	-2.76063	-2.54188	-3.18624	-2.95052	-4.70884	-4.74167	-7.26782	-2.52063	-2.71756	-3.41749
Smpd2	20	gene	47904392	47907503	-	4	ensembl	protein_coding	5.81567	5.86681	5.79054	4.74526	5.01408	5.62636	5.88875	6.1547	5.92679	6.18928	5.82872	6.12665	5.82551	5.78967	4.85763	5.10613	5.57859	5.83561	6.1685	5.90123
Ctse	13	gene	53499150	53521602	+	5	ensembl	protein_coding	0.376007	0.149298	0.698891	-0.882737	-0.378402	0.706659	1.20125	0.503927	-0.0269092	0.91559	0.337956	0.893831	0.235061	0.744621	-0.65001	-0.45813	0.679272	1.1464	0.557594	-0.223025
Olr476	3	gene	79968748	79969713	-	3	ensembl	protein_coding	-6.54728	-6.54728	-6.54728	-6.54728	-6.54728	-6.54728	-6.54728	-6.54728	-6.54728	-6.54728	-6.99595	-4.42835	-6.99595	-6.99595	-6.99595	-6.99595	-5.07686	-6.99595	-6.99595	-6.99595
Zbtb42	6	gene	146250223	146252352	+	2	ensembl	protein_coding	0.616181	-0.398402	0.54064	-0.437518	-1.82689	0.419413	0.714421	0.647516	0.764571	0.808171	0.662508	0.787644	-0.494667	0.533286	-0.264282	-1.96227	0.576997	0.726825	0.581495	0.70057
Ttc12	8	gene	52390859	52436391	-	4	ensembl	protein_coding	0.716492	1.08508	1.22805	0.152296	-0.341422	1.41558	1.06777	0.833445	1.00449	1.44087	0.650869	1.38095	1.04452	1.2405	0.329839	-0.143353	1.47046	1.00024	0.664824	0.963812
Dazap2	7	gene	140043812	140048948	+	6	ensembl	protein_coding	6.70283	6.9301	6.78815	5.76309	5.84092	6.88887	7.01134	6.92344	6.82009	7.13078	6.68443	7.04799	6.91891	6.79355	5.89355	5.89567	6.90148	6.9772	6.8886	6.79824
Smcp	2	gene	212089681	212094888	+	3	ensembl	protein_coding	-6.58353	-6.58353	-6.58353	-6.58353	-6.58353	-6.58353	-6.58353	-4.24851	-6.58353	-6.58353	-6.99676	-6.99676	-6.99676	-6.99676	-6.99676	-4.74404	-6.99676	-4.91379	-4.86516	-6.99676
Olr1159	8	gene	20052081	20053010	+	1	ensembl	protein_coding	-6.79924	-4.41956	-6.79924	-6.79924	-6.79924	-6.79924	-6.79924	-6.79924	-6.79924	-6.79924	-6.81449	-6.81449	-4.28232	-6.81449	-6.81449	-6.81449	-6.81449	-6.81449	-6.81449	-6.81449
Gstt1	20	gene	15989083	16006507	+	1	ensembl	protein_coding	1.81069	2.1078	1.84975	0.559462	0.327867	2.03357	2.4124	1.92818	2.12179	2.48213	1.82046	2.45921	2.08105	1.80718	0.818813	0.186893	2.03516	2.42625	1.92138	2.07724
Ccl28	2	gene	70743251	70767578	+	4	ensembl	protein_coding	-1.99251	-1.8259	-2.38061	-3.63493	-2.81206	-2.67233	-2.08675	-2.40862	-2.13149	-1.8674	-2.39788	-2.42986	-2.16956	-2.30161	-2.21668	-2.24576	-4.48364	-1.63754	-2.36608	-1.56398
Scaf4	11	gene	33991195	34047555	-	7	ensembl	protein_coding	4.65407	4.81211	4.85272	3.36175	3.88611	4.96611	5.10441	4.93748	4.79786	4.92571	4.62474	4.78059	4.81183	4.86984	3.44843	4.00408	4.9936	5.10119	4.902	4.76203
Cryba1	10	gene	66458194	66464417	-	6	ensembl	protein_coding	-4.41383	-4.14475	-4.31694	-6.53636	-6.53636	-4.38694	-3.59045	-4.33827	-6.53636	-6.53636	-4.74404	-3.93692	-4.49602	-4.63946	-7.00972	-7.00972	-3.86343	-3.9181	-4.70949	-7.00972
Acy3	1	gene	226104425	226107749	+	5	ensembl	protein_coding	1.81771	2.14644	1.9954	0.867294	1.14133	2.09315	2.35634	2.16167	2.10452	2.21667	1.74282	2.09476	2.11824	2.0007	0.998076	1.24566	2.06216	2.30575	2.12921	2.20312
Enkd1	19	gene	48537328	48541781	-	4	ensembl	protein_coding	1.35541	1.47938	1.81599	0.524893	0.6623	1.98185	1.81812	1.85764	1.73067	2.01238	1.28631	1.94648	1.50843	1.81962	0.701988	0.695469	1.98273	1.76243	1.84783	1.68734
Tlr3	16	gene	49739814	49753269	+	4	ensembl	protein_coding	0.829516	0.223638	1.11305	-1.00606	-0.475409	1.39732	1.07885	0.728911	0.838089	1.1152	0.946827	0.97624	0.185528	1.05871	-0.783622	-0.411669	1.58224	0.973864	0.612387	0.702615
Mapk1ip1	1	gene	218122520	218123311	-	2	ensembl	protein_coding	4.13838	4.34886	4.33125	3.06471	3.44177	4.18825	4.33433	4.32046	4.32904	4.56263	4.09643	4.49804	4.34368	4.34377	3.18293	3.54208	4.16916	4.2739	4.29967	4.31
Glg1	19	gene	53811076	53912971	+	2	ensembl	protein_coding	7.01966	7.16934	7.03745	5.91845	5.98736	6.96564	7.22361	7.06832	6.9353	6.97216	7.02854	6.83126	7.17772	7.05965	6.05274	6.05032	6.9557	7.20195	7.02891	6.9105
Pmaip1	18	gene	61365056	61369043	+	2	ensembl	protein_coding	-1.01482	-2.31888	-2.2331	-3.05503	-4.27814	-1.2977	-3.44054	-2.89985	-1.83008	-2.27419	-1.19098	-2.23047	-2.36457	-2.27808	-3.13793	-4.59947	-1.15192	-2.99535	-2.9321	-1.76146
Dnajc30	12	gene	26669070	26669729	-	2	ensembl	protein_coding	2.5293	2.79271	2.54748	1.59742	1.45953	2.56857	2.77345	2.95254	2.6233	2.98241	2.51661	2.96868	2.54132	2.63548	1.82471	1.44905	2.50658	2.71872	2.97881	2.68675
Zfp563	7	gene	15593481	15601988	+	4	ensembl	protein_coding	2.32906	2.54373	2.33617	1.49763	1.60958	2.79313	2.59451	2.58881	2.44909	2.6318	2.52692	2.56037	2.58813	2.31037	1.47725	1.61966	2.93033	2.5916	2.40099	2.3679
Tank	3	gene	54111817	54239689	+	6	ensembl	protein_coding	2.04697	2.46455	2.24964	1.08242	1.03366	2.48733	2.15787	2.27924	2.55264	2.60353	1.97789	2.44263	2.35335	2.20904	1.0151	1.40049	2.64207	2.12967	2.26602	2.52158
Hip1	12	gene	26178240	26312676	+	5	ensembl	protein_coding	5.32886	5.47821	5.17012	4.15067	4.25067	5.47194	5.43045	5.58097	5.03635	5.39035	5.33328	5.25309	5.48406	5.17564	4.29882	4.29817	5.5096	5.39304	5.58142	4.96147
Mir878	X	gene	151278363	151278439	-	1	ensembl	miRNA	-6.81374	-6.81374	-6.81374	-6.81374	-6.81374	-6.81374	-6.81374	-6.81374	-6.81374	-6.81374	-6.81374	-6.81374	-6.81374	-6.81374	-6.81374	-6.81374	-6.81374	-6.81374	-6.81374	-6.81374
Ankrd65	5	gene	176713256	176715513	+	1	ensembl	protein_coding	-2.69451	-6.02335	-6.02335	-6.02335	-6.02335	-3.14858	-2.30486	-6.02335	-6.02335	-6.02335	-3.12909	-5.30965	-5.01693	-5.16544	-7.61922	-7.61922	-4.36206	-3.46805	-3.4036	-5.21815
Nlrp1a	10	gene	57441083	57483576	-	5	ensembl	protein_coding	-1.40775	-0.620876	-0.637228	-1.62869	-3.28105	-0.415326	-0.106918	-1.63798	-1.06525	-0.24378	-1.54557	-0.118776	-0.99887	-0.889569	-1.89741	-2.95016	-0.129702	-0.144502	-1.50086	-0.869431
Olr907	7	gene	5705373	5706308	+	1	ensembl	protein_coding	-6.69977	-6.69977	-6.69977	-6.69977	-6.69977	-6.69977	-6.69977	-6.69977	-6.69977	-6.69977	-6.89168	-6.89168	-6.89168	-6.89168	-6.89168	-6.89168	-4.97258	-6.89168	-6.89168	-6.89168
Hif1a	6	gene	106242730	106287704	+	5	ensembl	protein_coding	4.64577	5.2131	4.90571	3.77867	3.96848	4.9097	5.06673	4.95737	4.91175	5.03945	4.58516	4.94296	5.22962	4.94759	3.93408	4.01559	4.91309	5.00724	4.94548	4.87591
Ston1	6	gene	22325769	22342414	+	6	ensembl	protein_coding	1.00447	0.861968	1.56719	0.215434	0.0457542	2.29974	1.84538	1.36607	1.41739	1.90695	0.755596	1.80972	0.78795	1.61288	0.370779	0.19221	2.40119	1.87316	1.31085	1.41601
Dnase2	19	gene	36998478	37001146	+	3	ensembl	protein_coding	3.19377	3.23843	3.58766	2.27806	2.15739	3.78496	3.94015	3.53115	3.56523	3.84018	3.13178	3.7992	3.08403	3.66661	2.40735	2.08584	3.90286	3.98413	3.47678	3.57839
Trmt6	3	gene	131942470	131954191	-	5	ensembl	protein_coding	3.6035	3.61038	3.42646	2.31921	2.50696	3.54165	3.599	3.39669	3.43624	3.75263	3.61853	3.70804	3.58313	3.44836	2.41729	2.60252	3.50575	3.55473	3.31182	3.44255
Dnlz	3	gene	9157627	9159386	-	6	ensembl_havana	protein_coding	3.41389	3.31376	3.30494	1.94923	2.62245	3.25598	3.41687	3.48029	3.42337	3.80311	3.30771	3.75746	3.27588	3.29242	2.23715	2.64968	3.20375	3.37489	3.54519	3.33975
Cdc14b	17	gene	1699259	1786825	-	6	ensembl	protein_coding	1.06214	1.95831	0.718643	-0.80696	0.831736	1.20541	1.18446	1.37852	1.04535	1.20755	1.43745	1.01261	1.67062	0.63657	-0.448314	0.229217	1.71092	1.44153	1.24079	0.853769
Uchl3	15	gene	89919807	89964085	+	5	ensembl	protein_coding	4.01857	4.1173	4.038	3.16039	2.90472	4.12913	4.17911	4.22247	4.11807	4.41638	4.05721	4.27744	4.10408	4.02401	3.35098	2.91314	4.11915	4.16156	4.20772	4.08884
Mtif2	14	gene	113621601	113631935	+	6	ensembl	protein_coding	2.65066	2.74065	2.69732	1.45154	2.04694	2.6583	2.36378	2.61938	2.53959	3.07115	2.62619	3.13686	2.76306	2.60582	1.63569	2.24787	2.63926	2.19979	2.49033	2.49443
Zbtb40	5	gene	159109614	159144251	-	5	ensembl	protein_coding	2.53387	2.93181	2.85613	0.9782	1.57606	2.90665	2.93065	2.98377	2.54003	2.14848	2.54417	2.00541	2.90816	2.91548	1.01502	1.79439	2.92364	2.85871	2.92831	2.49239
Agps	3	gene	69193349	69241491	+	4	ensembl	protein_coding	2.15514	2.63893	2.24664	1.21484	1.65495	2.44117	2.51944	2.28939	2.27836	2.41213	2.12517	2.36168	2.65262	2.12182	1.41154	1.92425	2.46583	2.47384	1.93813	2.37609
RGD1563888	11	gene	20731051	20783321	-	6	ensembl	protein_coding	1.68458	2.12088	2.24169	1.03854	0.513625	2.3654	2.16418	1.8364	2.01939	2.55166	1.4308	2.44184	2.23882	2.40718	1.04215	0.862931	2.0647	2.1973	1.86075	1.98988
Brap	12	gene	42260102	42285527	-	1	ensembl	protein_coding	4.79115	4.88333	4.75593	3.62786	3.73489	4.84727	5.03187	4.90561	4.73122	5.08014	4.90171	4.83876	4.83134	4.81933	3.68146	3.69253	4.85405	5.00936	5.0186	4.7421
Olr139	1	gene	175335370	175336317	+	1	ensembl	protein_coding	-6.71279	-4.28366	-6.71279	-3.82431	-6.71279	-4.52965	-6.71279	-6.71279	-4.48339	-6.71279	-6.84871	-6.84871	-3.53504	-6.84871	-3.5901	-6.84871	-4.60125	-6.84871	-6.84871	-4.57909
Slc44a3	2	gene	243077593	243151810	-	6	ensembl	protein_coding	-0.21738	0.256063	0.656648	-1.36615	-0.509058	0.228414	0.284599	0.15808	0.00668808	0.815984	-0.252552	1.14238	-0.268225	0.985935	-1.2571	-0.908704	0.633744	0.420861	-0.513769	0.331321
Nfe2l2	3	gene	69041647	69069072	-	5	ensembl	protein_coding	3.3149	3.34427	3.38587	2.01459	2.17192	4.08936	3.79262	3.28132	3.45302	3.77889	3.30344	3.69035	3.30443	3.42005	2.12222	2.19298	4.18332	3.78182	3.22484	3.40332
Mroh1	7	gene	117432821	117459811	+	4	ensembl	protein_coding	3.37821	3.16971	3.2448	2.15704	1.55736	3.4318	3.43342	3.22942	3.30915	3.12376	3.39004	2.93898	3.12149	3.25171	2.31453	1.63475	3.47461	3.41869	3.17665	3.31323
Klf16	7	gene	12174235	12184049	+	3	ensembl	protein_coding	6.12541	6.2077	6.35637	4.96561	5.39373	5.94426	6.6675	6.47072	6.24244	6.3907	6.09308	6.2776	6.17012	6.37603	5.0666	5.52821	5.87569	6.68381	6.45991	6.2334
Hcfc2	7	gene	27226472	27255036	-	5	ensembl	protein_coding	2.59713	2.68248	2.7071	1.33226	1.52853	2.65121	2.61394	2.40091	2.33301	2.59077	2.58982	2.47324	2.68181	2.77001	1.52805	1.48735	2.70631	2.61655	2.31197	2.27221
Dntt	1	gene	267732290	267763835	+	6	ensembl	protein_coding	-4.14874	-3.07385	-6.25118	-6.25118	-6.25118	-2.84748	-2.84202	-3.28485	-3.28828	-6.25118	-4.99831	-7.2961	-3.86185	-3.47886	-7.2961	-3.95424	-2.19423	-3.2294	-4.10122	-4.07964
Stxbp5	1	gene	5535192	5682141	-	7	ensembl	protein_coding	5.19507	5.25041	5.20827	3.806	4.21783	5.28725	5.26123	5.23182	5.12111	5.12822	5.09265	5.08502	5.19812	5.22999	4.00095	4.25819	5.37199	5.2311	5.14544	5.09375
Eya4	1	gene	24878801	25079460	+	6	ensembl	protein_coding	-0.398218	-0.0250065	0.548439	-0.900543	-0.3259	1.07888	0.22383	0.172021	0.0539522	0.639059	-0.518722	0.584453	-0.29014	0.559757	-0.640958	-0.308676	1.18283	0.165354	0.181063	0.151553
Fip1l1	14	gene	35976772	36034611	-	6	ensembl	protein_coding	4.67096	4.91171	4.71052	3.56195	3.90381	4.90695	4.80262	4.89547	4.82483	5.02915	4.6658	4.95004	4.91214	4.69074	3.67368	3.99287	4.90643	4.76975	4.86117	4.79534
Grip1	7	gene	64890318	65081385	+	7	ensembl	protein_coding	3.72023	3.7696	3.72553	2.59164	3.01076	3.68812	3.75166	3.81403	3.682	3.70181	3.70718	3.56953	3.75447	3.7495	2.68397	3.10955	3.70481	3.72984	3.77386	3.67265
Ccr4	8	gene	121843660	121844742	-	2	ensembl	protein_coding	-6.48776	-2.71142	-6.48776	-6.48776	-6.48776	-6.48776	-4.29671	-2.93561	-6.48776	-4.26599	-3.11543	-4.05152	-3.21649	-7.05284	-7.05284	-7.05284	-7.05284	-4.03315	-3.45546	-7.05284
Mycs	X	gene	18605539	18606831	+	2	ensembl	protein_coding	-5.74301	-5.74301	-3.49015	-3.64907	-5.74301	-5.74301	-5.74301	-5.74301	-3.51497	-3.5257	-4.7518	-5.61435	-3.01435	-4.11303	-5.38756	-4.0449	-5.54997	-7.79927	-4.1922	-4.17053
Jup	10	gene	88073766	88100379	-	5	ensembl	protein_coding	5.7074	5.83223	5.98859	4.75487	5.11284	6.07834	6.25829	6.08122	6.19017	6.3945	5.66355	6.33369	5.76016	5.99221	4.8579	5.22192	6.09144	6.23759	6.04151	6.19849
Rps25	8	gene	47346312	47348692	+	4	ensembl	protein_coding	4.82759	5.32713	4.89845	3.92372	4.31101	5.081	5.20982	5.12429	5.12821	5.34108	4.92888	5.32808	5.3947	4.80481	4.00095	4.4157	5.16045	5.07589	5.07751	4.98533
Rxfp1	2	gene	197738113	197930308	-	2	ensembl	protein_coding	-0.608902	-0.364535	0.335448	-0.611532	-0.637061	0.0878043	0.367212	0.0565865	0.226966	0.331186	-0.622608	0.254918	-0.463637	0.395221	-0.527983	-0.567933	0.0750236	0.317174	0.0796267	0.243371
Vom2r47	2	gene	174744152	174773776	-	5	ensembl	protein_coding	-2.43126	-3.3799	-3.54108	-5.61857	-5.61857	-3.6066	-3.60214	-3.56104	-5.61857	-5.61857	-4.19419	-5.77697	-3.08693	-2.9915	-4.545	-4.58405	-4.15382	-3.44008	-5.69931	-4.12444
Sprr1a	2	gene	212200403	212200861	+	4	ensembl	protein_coding	-6.53447	-6.53447	-6.53447	-6.53447	-6.53447	-6.53447	-6.53447	-6.53447	-4.14745	-6.53447	-7.02598	-7.02598	-3.96412	-4.8828	-7.02598	-7.02598	-7.02598	-7.02598	-7.02598	-4.92884
Gja4	5	gene	149142704	149145235	-	5	ensembl	protein_coding	1.09077	0.727969	0.623114	-0.645062	-1.12654	0.660476	1.12959	0.909799	0.385794	1.12463	1.14789	1.0089	0.752228	0.606952	-0.538619	-1.17804	0.711866	1.12446	0.892546	0.352348
Tnfaip8l2	2	gene	215804336	215820349	-	4	ensembl	protein_coding	2.05416	1.851	2.31395	1.13097	0.950877	2.33178	2.63225	2.25905	2.37782	2.76495	2.03604	2.73567	1.74595	2.29255	1.28343	1.01151	2.38843	2.64016	2.16583	2.36723
Lemd2	20	gene	8789657	8800115	-	5	ensembl	protein_coding	4.86157	4.88748	5.03082	3.84583	3.90937	4.94545	5.31329	5.20896	4.98526	5.26151	4.86644	5.17934	4.84459	5.0424	3.96616	3.97192	4.93576	5.30609	5.19658	4.94026
Nav3	7	gene	52215845	52510816	-	6	ensembl	protein_coding	5.36302	5.24536	5.05211	3.81194	3.85655	5.23503	5.08875	5.09442	5.16821	5.05219	5.4611	4.79901	5.24053	4.96491	3.93529	4.01593	5.30274	5.11867	5.02818	5.10122
Pigu	3	gene	157245255	157253318	-	2	ensembl	protein_coding	0.234636	0.676747	0.185883	-0.652706	-0.785717	0.433293	0.656696	0.516562	0.407532	0.764788	0.156092	0.987612	1.29818	-0.225186	-0.928712	0.691357	-1.0811	0.493279	0.192951	0.853245
Xrcc4	2	gene	18553028	18803145	-	2	ensembl	protein_coding	2.3112	2.58072	2.20669	1.45441	1.48203	2.52285	2.25816	2.27193	2.50635	2.65261	2.33242	2.54485	2.61414	2.2013	1.61356	1.59074	2.53457	2.19916	2.17897	2.43724
Fpgt	2	gene	280067673	280074692	-	6	ensembl	protein_coding	1.775	2.10732	2.05071	0.606327	0.993419	2.17864	1.50687	1.96631	1.69619	1.84975	1.724	1.73758	2.10855	2.08998	0.689926	1.18412	2.24807	1.43283	1.91612	1.59938
Osbpl2	3	gene	181579720	181624984	-	6	ensembl	protein_coding	5.66723	5.80023	5.57516	4.58342	4.71132	5.61638	5.72826	5.75775	5.57893	5.83086	5.68494	5.72718	5.80071	5.57096	4.69462	4.78929	5.61237	5.69558	5.7359	5.538
Epm2aip1	8	gene	118865756	118868983	+	2	ensembl	protein_coding	5.11363	5.26908	4.90886	4.00214	3.94996	5.1899	5.10797	4.97873	4.88588	5.065	5.07522	4.7836	5.04913	5.16104	4.03549	4.0417	5.31869	5.17169	4.93397	4.90063
Timd2	10	gene	31565010	31609386	-	4	ensembl	protein_coding	-1.23484	-0.255063	-1.42406	-2.68373	-1.56937	-1.97335	-1.46536	-1.23613	-0.971722	-0.647422	-3.88575	-1.22721	0.120693	-1.83505	-3.88575	-1.78256	0.46662	-1.21094	-0.362622	0.141524
Hpcal4	5	gene	144660374	144672320	+	1	ensembl	protein_coding	7.62195	7.73553	7.62561	6.41683	6.49774	7.62492	8.00494	7.79293	7.64118	7.66447	7.63432	7.64485	7.78222	7.5052	6.51977	6.7697	7.53904	7.88671	7.73529	7.60899
Klra2	4	gene	227988909	228022115	-	3	ensembl	protein_coding	-4.59563	-4.59563	-4.59563	-4.59563	-4.59563	-4.59563	-4.59563	-4.59563	-4.59563	-4.59563	-4.49528	-3.53216	-4.06697	-4.85914	-5.09731	-5.57724	-3.98832	-4.17722	-4.92802	-5.23463
Bok	9	gene	100482657	100493562	+	5	ensembl	protein_coding	6.83294	6.32489	6.6589	5.47658	5.64637	6.66515	6.83714	6.91324	7.04707	7.27274	6.85443	7.23183	6.21624	6.65063	5.58694	5.71929	6.64897	6.79651	6.89421	7.07595
Polr3f	3	gene	145114599	145130969	+	5	ensembl	protein_coding	3.55136	4.00801	3.51792	2.1861	2.803	3.58738	3.63385	3.60388	3.58941	3.845	3.54672	3.84901	3.97493	3.49828	2.30502	2.85501	3.67651	3.55566	3.51463	3.55014
Cd22	1	gene	90470008	90484868	-	4	ensembl	protein_coding	0.301336	-0.329871	2.40362	-2.22708	-0.601359	2.69362	2.23943	0.833954	2.18956	2.12358	0.138262	2.08687	-0.373205	2.52617	-2.18363	-0.713395	2.77566	2.2939	0.821652	2.25449
Bmyc	3	gene	2898075	2898834	+	1	ensembl	protein_coding	5.11449	4.90431	5.30887	3.85169	4.25675	4.89637	5.46491	5.4801	5.35399	5.67578	5.11432	5.62414	4.85816	5.32645	3.93929	4.38007	4.82671	5.42043	5.46029	5.35738
Mr1	13	gene	77707537	77725283	-	3	ensembl	protein_coding	-0.169425	0.993333	0.245893	-0.243755	-0.439567	1.51627	1.23623	0.0798516	0.420993	0.80061	-0.513053	0.669216	0.994381	0.209239	-0.0243594	-0.445315	1.61753	1.23585	0.16484	0.5321
Hoxa2	AABR06109730.1	gene	33092	34853	-	1	ensembl	protein_coding	-6.04844	-3.41996	-6.04844	-6.04844	-6.04844	-6.04844	-6.04844	-6.04844	-6.04844	-6.04844	-7.40942	-4.65954	-7.40942	-4.52059	-7.40942	-5.23396	-7.40942	-4.6427	-4.59025	-4.5712
Rnf24	3	gene	130344343	130345306	-	6	ensembl	protein_coding	0.86623	1.20404	0.671041	-0.33199	-0.0180631	0.710076	0.878581	1.16286	0.610171	0.939482	0.88434	0.780927	1.24589	0.517122	-0.115371	0.169638	0.784467	0.804161	1.13604	0.485217
Pbx3	3	gene	18569629	18763387	-	5	ensembl	protein_coding	2.83565	2.98296	2.36842	1.57279	1.60183	2.58593	3.11101	3.01648	2.9776	3.21769	2.81072	3.13646	2.99993	2.29976	1.71686	1.6758	2.54802	3.11278	2.98914	2.98087
Asf1b	19	gene	36055967	36070506	+	5	ensembl	protein_coding	-2.0249	-2.43123	-2.34454	-2.5318	-6.51005	-1.39929	-2.18678	-1.93352	-2.37351	-3.03409	-2.08193	-2.89753	-2.56597	-2.42511	-2.31631	-6.88847	-1.40598	-2.10385	-1.85221	-2.23238
Tcerg1l	1	gene	217478056	217666989	-	5	ensembl	protein_coding	1.3578	1.11805	0.407872	0.00868732	-2.57333	-0.489541	1.09041	0.98464	0.0809185	0.364909	1.46026	0.312129	1.14085	0.411288	0.219685	-2.7069	-0.650167	1.16703	0.954404	0.0418348
Ncoa4	16	gene	8219983	8240323	+	6	ensembl	protein_coding	4.97956	5.31273	5.07206	4.00633	3.93646	5.3467	5.37629	5.14413	5.02295	5.28856	4.95088	5.1548	5.28974	5.14427	4.20229	3.96076	5.37374	5.30744	5.10386	4.99798
Mdc1	20	gene	5502121	5516934	-	3	ensembl	protein_coding	2.18562	2.23732	2.4279	0.852056	1.13821	2.76407	2.62195	2.02098	2.64102	2.05279	2.16663	1.95925	2.20258	2.41006	0.96957	1.23494	2.77585	2.64138	1.95125	2.63039
Epha4	9	gene	82880599	83022444	-	6	ensembl	protein_coding	8.19086	8.36822	8.3006	7.0712	7.25022	8.32738	8.26652	8.29831	8.32322	8.42198	8.18922	8.32678	8.35771	8.31732	7.18409	7.3215	8.34697	8.20681	8.25112	8.31699
Olr1302	8	gene	43178478	43179422	-	2	ensembl	protein_coding	-6.81374	-6.81374	-6.81374	-6.81374	-6.81374	-6.81374	-6.81374	-6.81374	-6.81374	-6.81374	-6.81374	-6.81374	-6.81374	-6.81374	-6.81374	-6.81374	-6.81374	-6.81374	-6.81374	-6.81374
RGD1563941	8	gene	51422579	51422993	+	4	ensembl	protein_coding	0.584574	0.071941	1.20114	-0.376756	-0.398386	1.18171	1.12344	1.15378	0.851169	1.22352	0.583865	1.15377	0.0463305	1.25332	-0.257516	-0.235755	1.13263	1.13352	0.94359	0.862378
Creb3	5	gene	63588152	63592782	+	6	ensembl	protein_coding	5.17967	5.22682	5.01262	4.02449	4.12827	5.04525	5.25687	5.14658	5.18045	5.29206	5.20432	5.20059	5.2019	4.99854	4.15561	4.14049	5.08372	5.23837	5.079	5.19054
Dgke	10	gene	73703727	73725818	+	5	ensembl_havana	protein_coding	4.90369	4.71843	4.85205	3.63756	3.72754	4.79076	4.82318	4.79728	4.81159	4.87483	4.95924	4.77958	4.66099	4.86698	3.75341	3.8142	4.81747	4.7512	4.73693	4.79692
Zbtb17	5	gene	163713685	163734711	+	6	ensembl_havana	protein_coding	4.65296	4.82166	4.94809	3.89542	4.05258	4.74448	5.21486	5.2178	4.95565	5.08545	4.60938	4.97446	4.75293	4.99147	4.04591	4.14018	4.68444	5.21268	5.23993	4.93755
Retn	12	gene	4364007	4365746	+	5	ensembl	protein_coding	-3.1112	-6.52887	-6.52887	-4.45838	-6.52887	-6.52887	-4.36671	-6.52887	-6.52887	-6.52887	-3.42871	-4.83326	-7.05244	-4.69469	-4.60292	-7.05244	-7.05244	-4.81656	-7.05244	-7.05244
Vamp7	12	gene	20886479	21089729	+	3	ensembl	protein_coding	4.67188	4.66931	4.65717	3.42729	3.4531	4.64839	4.61457	4.71698	4.7337	4.73621	4.71773	4.69205	4.72334	4.5293	3.65807	3.45941	4.64099	4.5071	4.65455	4.74605
Kcnf1	6	gene	52191821	52193338	-	4	ensembl	protein_coding	0.881687	1.22933	1.77914	-0.177433	-0.13195	0.659877	2.34889	1.40463	0.790494	0.596571	1.02746	0.522056	1.36679	1.84883	-0.201651	-0.16571	0.88682	2.34284	1.28213	0.471662
Prss45	8	gene	118451036	118456674	+	1	ensembl	protein_coding	-6.26042	-6.26042	-4.02287	-6.26042	-6.26042	-6.26042	-3.29045	-6.26042	-4.04752	-3.2566	-7.29684	-4.25924	-4.81193	-4.10576	-7.29684	-4.89377	-5.02646	-3.03059	-7.29684	-4.16166
Gpm6a	16	gene	39144855	39253973	-	5	ensembl	protein_coding	8.45589	8.81344	8.50375	7.40224	7.48666	8.66151	8.61561	8.53943	8.50877	8.68026	8.4471	8.57755	8.82746	8.50954	7.53365	7.54229	8.69433	8.56766	8.48816	8.47982
Mir3557	18	gene	55956640	55956752	+	2	ensembl	miRNA	-4.07579	-6.23973	-3.97701	-6.23973	-6.23973	-6.23973	-6.23973	-3.99876	-6.23973	-6.23973	-5.11616	-7.32225	-4.87466	-5.01434	-4.92451	-4.95527	-7.32225	-3.79544	-5.08252	-7.32225
Emc4	3	gene	110445980	110450999	-	5	ensembl	protein_coding	5.97253	5.85164	5.73855	4.75601	4.84277	5.83152	5.81757	6.04901	6.00405	6.3271	5.98599	6.28184	5.72713	5.73436	4.8858	4.90159	5.84095	5.77502	6.05895	5.99913
Slc7a10	1	gene	92563400	92579262	+	4	ensembl	protein_coding	4.81475	4.57926	4.49899	3.37147	3.46343	4.40619	4.66623	4.67977	4.36555	4.91086	4.87444	4.84193	4.52031	4.53807	3.5163	3.47529	4.37142	4.6311	4.65341	4.33423
Dpep3	19	gene	48813854	48819507	-	4	ensembl	protein_coding	-3.09836	-2.32003	-2.51011	-5.92244	-5.92244	-5.92244	-3.06413	-1.90454	-3.79274	-5.92244	-4.44863	-4.48938	-2.85629	-3.35546	-5.1291	-7.71038	-4.41235	-3.18654	-1.96048	-2.83105
Fggy	5	gene	118461635	118848789	+	6	ensembl	protein_coding	2.52968	2.9803	2.6841	1.50471	1.74385	3.0692	2.97689	2.78763	2.66994	2.93141	2.46905	2.81639	2.96183	2.68923	1.6479	1.82924	3.12356	2.98813	2.70507	2.64735
Chchd10	20	gene	15820607	15822447	-	4	ensembl	protein_coding	7.61342	7.37921	7.64682	6.54141	6.63746	7.44526	7.86614	7.79233	7.68973	8.12685	7.61133	8.08483	7.27627	7.6639	6.65982	6.72059	7.40782	7.85787	7.78265	7.67354
Pld1	2	gene	133400609	133554180	+	5	ensembl	protein_coding	3.21808	3.67339	3.77975	2.52216	2.52684	4.01283	4.0268	3.43567	3.7293	3.86077	3.1634	3.75835	3.631	3.78906	2.65775	2.60768	4.08027	4.02128	3.34265	3.73415
Gpr19	4	gene	232913212	232929837	-	5	ensembl	protein_coding	2.99964	3.24277	3.12116	2.31432	2.10352	3.22256	3.33398	3.31389	2.99459	3.32068	2.97181	3.23747	3.22057	3.11882	2.47383	2.14022	3.26668	3.30257	3.27144	2.9637
Optn	17	gene	78833450	78884466	+	7	ensembl	protein_coding	5.76624	5.80787	5.83816	4.57375	4.91561	6.09847	5.89487	5.80613	5.84792	6.2805	5.74834	6.31759	5.7735	5.79442	4.68673	5.04672	6.09653	5.81837	5.7508	5.79651
Cyp2b2	1	gene	84361236	84376889	+	7	ensembl	protein_coding	-5.85962	-5.85962	-5.85962	-5.85962	-5.85962	-5.85962	-5.85962	-5.85962	-5.85962	-5.85962	-4.42221	-5.60207	-7.46623	-4.76889	-7.46623	-5.43497	-4.83722	-5.58803	-5.54418	-7.46623
Stbd1	14	gene	16889875	16893279	-	5	ensembl	protein_coding	0.118816	0.642412	0.645631	-0.35944	-0.728938	1.24439	1.41144	0.587512	1.13783	1.03588	-0.00344396	0.964419	0.577695	0.68921	-0.197347	-0.687263	1.31986	1.44866	0.495606	1.12814
Adra2b	3	gene	126332394	126334420	+	5	ensembl	protein_coding	-1.16497	-0.939664	-1.04706	-3.03829	-3.42116	-1.50948	-0.724455	-1.45046	-1.51816	-1.34775	-0.958307	-1.4826	-1.13775	-1.31115	-3.36762	-2.5113	-2.11659	-0.464412	-0.722117	-2.08962
Olr1226	8	gene	41987598	41988539	+	1	ensembl	protein_coding	-6.05922	-6.05922	-6.05922	-3.75682	-6.05922	-6.05922	-6.05922	-6.05922	-6.05922	-6.05922	-7.38377	-7.38377	-4.39651	-5.2928	-4.44615	-7.38377	-4.60821	-4.65644	-5.35458	-7.38377
Astl	3	gene	126310094	126325827	+	4	ensembl	protein_coding	-3.62989	-3.36613	-5.71045	-5.71045	-2.88279	-5.71045	-5.71045	-3.55583	-5.71045	-5.71045	-4.19584	-4.23756	-4.46044	-4.07116	-7.95102	-4.55434	-4.70781	-5.63403	-3.75345	-4.13169
Apobr	1	gene	204978096	204982599	+	5	ensembl	protein_coding	0.986013	1.04954	1.31697	0.0126013	-0.315107	1.46708	1.62831	1.50921	1.16345	1.69381	1.02826	1.65494	1.08721	1.32609	0.105587	-0.285999	1.47065	1.56442	1.43769	1.12304
Pla2g1b	12	gene	48676472	48685929	-	2	ensembl	protein_coding	-3.54297	-2.74029	-2.93632	-6.45538	-6.45538	-3.51298	-4.29987	-6.45538	-3.46233	-6.45538	-3.42555	-7.06528	-3.14104	-2.91441	-7.06528	-7.06528	-3.92177	-3.9764	-4.76708	-2.97422
Ttf2	2	gene	222765601	222799844	-	6	ensembl	protein_coding	1.75385	1.93415	1.74521	0.409504	0.709195	2.18612	2.08963	1.77705	1.75915	1.81559	1.77484	1.68428	1.85962	1.77446	0.581298	0.685213	2.29962	2.11324	1.69885	1.70803
Vps13b	7	gene	74283881	74879193	+	6	ensembl	protein_coding	5.44192	5.549	5.32509	4.34746	4.28569	5.5914	5.5485	5.38133	5.37081	5.43533	5.45291	5.30632	5.53564	5.30823	4.47942	4.38446	5.63991	5.50488	5.31748	5.34727
Tmc5	1	gene	195224593	195282791	+	4	ensembl	protein_coding	1.10741	1.31924	0.815421	-0.351735	-0.0314918	0.887757	0.965842	0.890225	0.764699	1.00273	1.04485	1.03164	0.819167	1.14676	-0.184848	-0.139719	1.17934	1.17548	0.548697	0.748722
Gfra4	3	gene	130078342	130080863	-	6	ensembl	protein_coding	0.602659	-0.0589393	0.452248	0.0280923	-0.338983	0.768092	0.709435	0.508906	0.422554	0.872489	0.348135	0.869879	-0.330155	0.481605	0.308013	-0.142899	0.711469	0.799085	0.716002	0.20542
Pdcl	3	gene	26841046	26849027	-	4	ensembl	protein_coding	3.06222	3.29361	3.25178	2.19016	2.62728	3.46213	3.40548	3.24502	3.07424	3.40979	3.08464	3.31936	3.27207	3.22646	2.14936	2.75175	3.44533	3.33775	3.31329	3.1217
Myocd	10	gene	51439733	51534448	-	6	ensembl	protein_coding	-2.02479	-1.99062	-1.60763	-2.44995	-3.10487	-2.14739	-2.14064	-2.07865	-2.08304	-1.31354	-1.7994	-1.49226	-1.76464	-1.0779	-5.71586	-1.84736	-1.58355	-0.888137	-3.0279	-1.7441
Ppib	8	gene	71388458	71394501	+	6	ensembl	protein_coding	6.44251	6.51133	6.51585	5.54115	5.5223	6.49936	6.69579	6.72182	6.60041	6.92405	6.42631	6.87609	6.43343	6.51101	5.6897	5.57371	6.49875	6.66187	6.70384	6.59986
Crlf1	16	gene	20530521	20541796	-	5	ensembl	protein_coding	5.16664	5.604	5.56545	4.51925	4.71016	5.11898	5.7956	6.01328	5.54439	5.56793	5.10051	5.46565	5.58278	5.57574	4.66441	4.84323	5.03413	5.7723	6.05062	5.51633
Rnf216	12	gene	15547724	15668304	+	6	ensembl	protein_coding	5.15269	5.27002	5.18119	4.17741	4.21432	5.32315	5.47974	5.38029	5.16271	5.31254	5.14794	5.17969	5.2604	5.17134	4.31628	4.27178	5.34025	5.47004	5.36071	5.13563
RGD1308147	17	gene	50780397	50787033	-	5	ensembl	protein_coding	3.57123	3.63187	3.27333	2.30922	2.3073	3.36338	3.3289	3.48626	3.51561	3.83291	3.60253	3.78157	3.63917	3.24839	2.42838	2.37634	3.36928	3.25164	3.43402	3.48869
Mov10	2	gene	226697325	226717439	-	6	ensembl	protein_coding	2.16742	2.47768	2.73286	0.904794	1.22466	2.36419	2.74577	2.60084	2.48988	2.45983	2.14817	2.29863	2.48196	2.72483	0.975369	1.30793	2.38605	2.71316	2.64936	2.48248
Ttc5	15	gene	31530805	31548395	-	6	ensembl	protein_coding	4.97751	5.11184	4.88475	3.85045	3.90732	5.00155	5.15977	5.1448	4.90052	5.31547	4.97688	5.24407	5.09515	4.86945	3.98921	3.98034	5.01231	5.1258	5.12135	4.83943
Col2a1	7	gene	139646995	139675750	-	5	ensembl	protein_coding	-1.95868	-0.814779	0.271462	-0.863191	-1.27287	-0.110062	-0.665856	-0.0539431	-0.378329	-0.319433	-1.02051	-0.760163	-0.956202	0.295126	-0.83501	-1.40433	-0.0316955	-0.667263	-0.285611	-0.500028
Pccb	8	gene	108785884	108836132	-	5	ensembl	protein_coding	4.54955	4.74138	4.73484	3.74683	3.66932	4.66749	4.84615	4.80251	4.61338	4.93948	4.51167	4.87099	4.71606	4.75841	3.89283	3.73539	4.66544	4.81333	4.76446	4.58236
Pde6d	9	gene	93290037	93334964	-	5	ensembl	protein_coding	4.02122	4.18757	4.15617	3.0446	3.36961	4.36757	4.3131	4.27326	4.06839	4.59557	3.99372	4.5676	4.11463	4.15095	3.18159	3.47913	4.39252	4.27432	4.23757	4.00504
Zfp870	7	gene	15317710	15322754	-	3	ensembl	protein_coding	2.67727	2.82857	2.54003	1.7828	1.51045	2.71637	2.84393	2.78123	2.68029	2.62368	2.67004	2.4849	2.8162	2.49158	1.94105	1.59059	2.77663	2.83195	2.74134	2.64031
Anxa8	16	gene	8737581	8752766	+	5	ensembl	protein_coding	-0.370409	-0.425235	-0.149319	-1.8441	-2.15603	-1.74301	-0.56876	-1.40564	-1.6903	-0.532502	-0.629271	-0.417694	-1.55411	-0.495656	-1.81335	-2.34431	-2.02089	-0.652428	-0.397189	-0.560416
Mir3559	X	gene	76261608	76261722	-	1	ensembl	miRNA	-6.81374	-6.81374	-6.81374	-6.81374	-6.81374	-6.81374	-6.81374	-6.81374	-6.81374	-6.81374	-6.81374	-6.81374	-6.81374	-6.81374	-6.81374	-6.81374	-6.81374	-6.81374	-6.81374	-6.81374
Nptxr	7	gene	121002639	121020713	-	6	ensembl	protein_coding	11.4598	11.1327	11.165	10.0027	10.0695	11.0416	11.2011	11.3278	11.4521	11.4099	11.5109	11.3163	11.0854	11.1653	10.1269	10.1346	11.0092	11.1393	11.2981	11.4763
Penk	5	gene	21834414	21839739	-	6	ensembl	protein_coding	2.98596	3.90143	3.23252	2.55815	2.10923	2.40324	2.96916	3.37743	3.19158	2.38683	2.95178	2.24794	3.9546	3.25039	2.86153	2.25146	2.27634	2.80375	3.33251	3.18521
Fam220a	12	gene	15088874	15089653	-	4	ensembl	protein_coding	4.49133	4.47093	4.17557	3.24139	3.54427	4.54909	4.61471	4.64245	4.31852	4.73877	4.47914	4.63294	4.29276	4.27045	3.34083	3.54866	4.69937	4.58788	4.63271	4.30228
Eif4g2	1	gene	182868165	182880312	-	6	ensembl	protein_coding	7.8767	8.10983	7.77614	6.72632	6.92976	8.08983	7.97753	7.91007	7.85888	8.11985	7.88508	8.01283	8.14322	7.75726	6.83439	6.96944	8.14829	7.93847	7.86275	7.82318
Blvra	3	gene	126078456	126103260	+	5	ensembl	protein_coding	4.04232	3.58945	3.35564	2.89159	3.01212	4.01289	3.54619	3.66781	3.83611	4.02957	4.03887	3.91572	3.51964	3.31194	3.1099	3.12807	4.08134	3.46979	3.59064	3.81779
Anxa13	7	gene	98819726	98871641	-	6	ensembl	protein_coding	-6.13435	-3.75739	-3.92852	-6.13435	-6.13435	-6.13435	-3.99336	-3.94972	-6.13435	-2.67903	-4.30278	-3.41664	-4.0257	-4.18533	-7.44262	-4.98969	-5.12514	-4.32301	-3.72621	-7.44262
Prl6a1	17	gene	44570611	44575451	-	5	ensembl	protein_coding	-6.07214	-6.07214	-6.07214	-6.07214	-6.07214	-6.07214	-6.07214	-6.07214	-6.07214	-6.07214	-5.42771	-5.45673	-5.22047	-7.3209	-5.26324	-7.3209	-7.3209	-7.3209	-5.39884	-4.67081
Sprr3	2	gene	212227761	212228519	+	4	ensembl	protein_coding	-6.02186	-6.02186	-6.02186	-6.02186	-6.02186	-6.02186	-6.02186	-6.02186	-6.02186	-6.02186	-5.4621	-4.34508	-7.35528	-5.37472	-7.35528	-7.35528	-7.35528	-5.47709	-5.43323	-4.70519
Xbp1	14	gene	86423858	86428922	+	5	ensembl	protein_coding	5.86915	6.26631	5.85126	4.93079	5.12062	5.94995	6.22378	6.11943	5.97574	5.91674	5.83544	5.76285	6.27728	5.84776	5.0608	5.20836	5.93727	6.21115	6.12293	5.95994
Capn7	16	gene	7371493	7407436	+	6	ensembl	protein_coding	4.26393	4.76678	4.46162	3.28031	3.44592	4.61503	4.51646	4.55126	4.45413	4.66254	4.21314	4.56859	4.77397	4.46883	3.40107	3.51571	4.64035	4.47985	4.52771	4.42877
Ezr	1	gene	48590973	48634511	-	5	ensembl	protein_coding	5.69415	5.61508	5.58108	4.51493	4.79126	5.88578	6.12719	5.87562	5.57624	6.10982	5.68636	6.0426	5.53297	5.56029	4.62795	4.88901	5.89557	6.14839	5.85713	5.53087
Acaa1a	8	gene	127234654	127242997	+	4	ensembl	protein_coding	4.42055	4.29571	4.6045	3.4841	3.58499	4.49303	4.7015	4.67165	4.53826	4.9607	4.34805	4.89022	4.10427	4.69982	3.59416	3.58673	4.585	4.69813	4.67087	4.57776
Akap6	6	gene	83111482	83545576	+	4	ensembl	protein_coding	6.92634	6.93279	6.49445	5.48118	5.68457	6.75732	6.68389	6.63058	6.66578	6.61512	6.97308	6.47346	6.94682	6.47004	5.61594	5.77213	6.77683	6.62815	6.57913	6.63646
H2afy	17	gene	11440883	11502763	+	7	ensembl	protein_coding	5.82019	5.87767	6.03992	4.77234	5.08134	5.85668	6.17287	6.20797	6.08843	6.24912	5.78893	6.15063	5.84091	6.05423	4.89024	5.19846	5.84764	6.13232	6.19845	6.06471
Mertk	3	gene	128669942	128777039	-	3	ensembl	protein_coding	4.32905	4.36706	4.37404	2.97226	3.17991	4.79194	4.59573	4.58594	4.1866	4.37132	4.31509	4.39222	4.36637	4.42569	3.19757	3.10494	4.84239	4.46361	4.57173	4.07425
Sufu	1	gene	273574759	273669937	+	6	ensembl	protein_coding	2.89088	3.0679	2.88667	1.58033	1.8545	2.90502	3.42443	3.15625	2.70298	2.98311	2.84396	2.83152	3.06399	2.89012	1.74241	1.96464	2.92075	3.43931	3.10743	2.64793
Ica1l	9	gene	66602089	66639739	-	4	ensembl	protein_coding	0.949585	1.31791	1.22823	0.0471584	0.30495	1.3997	1.36924	1.67239	1.22045	1.5777	1.01387	1.38122	1.35917	1.35121	0.11983	0.269056	1.35565	1.36694	1.62796	1.24242
Slc23a3	9	gene	82097449	82106015	-	4	ensembl	protein_coding	-3.31967	-5.9056	-3.93377	-4.07287	-5.9056	-3.29303	-3.99172	-3.24499	-5.9056	-3.96489	-3.63237	-4.35975	-5.07302	-4.16167	-5.13833	-4.07607	-4.266	-4.33575	-4.26097	-4.23382
Krt4	7	gene	141315719	141321166	-	4	ensembl	protein_coding	-3.36766	-5.33933	-5.33933	-5.33933	-5.33933	-5.33933	-2.6028	-5.33933	-3.30037	-3.31019	-4.1106	-3.80957	-5.83942	-4.41511	-5.89774	-3.53799	-5.11874	-4.13489	-3.71466	-4.03826
Emilin3	3	gene	163128168	163132983	-	5	ensembl	protein_coding	-3.61651	-1.47111	-5.64467	-2.92725	-3.63868	-2.36122	-2.82974	-3.54431	-3.54729	-5.64467	-5.65093	-3.79431	-2.39295	-3.61697	-3.16862	-5.47299	-2.67365	-2.9399	-2.66901	-2.84609
Efna1	2	gene	208002159	208009501	-	4	ensembl	protein_coding	1.83287	1.98688	2.42604	1.26767	1.41984	2.29719	2.2937	2.13587	2.48272	2.55833	1.71874	2.50726	1.96833	2.45535	1.44082	1.52332	2.31546	2.23888	2.01663	2.51632
Vps37d	12	gene	26650964	26656443	+	2	ensembl_havana	protein_coding	4.53026	4.2175	4.36761	2.99263	3.44039	4.41668	4.53369	4.70551	4.68908	4.89074	4.55519	4.82467	4.14868	4.37659	3.07511	3.52276	4.38934	4.47417	4.70523	4.71234
Mst1r	8	gene	116040918	116054449	+	4	ensembl	protein_coding	1.27907	-0.104269	0.696158	-0.802011	-1.15725	0.287872	1.79857	0.463698	-0.205974	0.588597	1.29007	0.562961	-0.0262325	0.713585	-0.727234	-1.05675	0.185312	1.79114	0.38552	-0.273912
Taar4	1	gene	24033714	24034757	-	1	ensembl	protein_coding	-6.25889	-6.25889	-6.25889	-6.25889	-6.25889	-6.25889	-6.25889	-2.71179	-3.22081	-6.25889	-5.09317	-5.12715	-4.85045	-7.31035	-7.31035	-7.31035	-5.06282	-7.31035	-3.32539	-3.30331
Tmem262	1	gene	228379332	228380048	+	1	ensembl	protein_coding	-6.8159	-3.02408	-3.73336	-6.8159	-4.6719	-4.62074	-3.8073	-2.87858	-4.57422	-4.58502	-6.66223	-4.49492	-2.46416	-3.52624	-6.66223	-3.46106	-6.66223	-4.4786	-2.70626	-4.40905
Kcnip1	10	gene	18444651	18663340	-	7	ensembl	protein_coding	1.60245	1.73293	0.846818	-0.331211	0.578948	1.03979	1.22148	1.61246	1.42646	0.724708	1.64554	0.482132	1.73714	1.12163	-0.380759	0.879038	1.04497	1.05083	1.41098	1.46333
Plac9	16	gene	3817394	3831461	+	4	ensembl	protein_coding	-3.04051	-2.37413	-2.28848	-3.10919	-4.33047	-3.00972	-1.76237	-2.59574	-2.31711	-1.19855	-3.31705	-1.40245	-2.05157	-2.22452	-2.68658	-4.55124	-2.8843	-1.79615	-2.56784	-2.54458
Chkb	7	gene	130089653	130093008	-	2	ensembl	protein_coding	4.1701	3.97859	4.28887	2.8612	2.94713	4.10644	4.21531	4.19696	4.30291	4.48522	4.19515	4.42881	3.88328	4.3289	2.98437	3.03233	4.10409	4.18858	4.13123	4.27599
Angptl4	7	gene	18805416	18811643	-	5	ensembl	protein_coding	2.31303	2.08555	1.84063	0.416779	0.563305	2.22618	2.27	1.88215	1.6959	2.62902	2.3567	2.56533	2.09242	1.81877	0.582512	0.542234	2.30567	2.26205	1.77319	1.62367
Vps16	3	gene	129448274	129469256	+	5	ensembl	protein_coding	5.35491	5.4731	5.43283	4.28279	4.3132	5.38842	5.62557	5.49724	5.38028	5.58882	5.34856	5.484	5.45353	5.45583	4.41468	4.37039	5.40941	5.59986	5.45251	5.34838
Mpp5	6	gene	111299906	111403406	+	4	ensembl	protein_coding	3.97969	4.49039	4.07817	2.95741	3.00885	4.54201	4.34616	4.23121	4.19994	4.2712	3.97626	4.25018	4.49408	4.02347	3.08749	3.154	4.55575	4.1925	4.16664	4.20467
Fgf14	15	gene	113762510	114450472	-	7	ensembl	protein_coding	2.84985	2.86427	2.34503	1.48672	1.77477	2.65199	2.81537	2.40798	2.8335	2.86583	2.74382	2.72541	2.97278	2.45997	1.61352	1.91095	2.54114	2.5534	2.5499	2.82443
Car14	2	gene	217500706	217507185	-	4	ensembl	protein_coding	2.63419	2.79585	2.80372	1.67154	1.88883	2.91335	2.98174	3.13443	2.92229	3.22662	2.59443	3.23109	2.83332	2.67027	1.70327	2.10257	2.84757	2.90603	3.12645	2.95757
Zfp612	19	gene	52384704	52394810	-	4	ensembl	protein_coding	4.57134	4.73678	4.61428	3.12237	3.65647	4.68579	4.46351	4.49207	4.46559	4.7646	4.62456	4.67138	4.78988	4.63851	3.23005	3.75066	4.7372	4.3345	4.40982	4.38622
Ccdc43	10	gene	90434924	90447114	-	6	ensembl	protein_coding	2.85856	3.06035	2.66478	1.92226	1.90546	3.07318	3.08948	2.87347	2.83024	3.24626	2.8038	3.18863	3.05881	2.67337	2.03641	1.99481	3.08941	3.03545	2.86518	2.77815
Tsc22d1	15	gene	62249980	62348598	+	7	ensembl	protein_coding	7.84815	7.98905	7.72401	6.79842	6.80689	7.88432	8.00546	7.98021	7.79839	7.99175	7.85949	7.91884	8.02012	7.67483	6.94214	6.88407	7.87257	7.93591	7.96042	7.75825
Chchd1	15	gene	8126681	8127855	-	4	ensembl	protein_coding	3.95543	4.28169	4.04252	2.97759	2.98097	4.15707	4.07424	4.02882	3.98972	4.45412	3.93809	4.39802	4.27717	4.02772	3.09882	3.06406	4.18564	4.00118	3.97809	3.97338
Bdnf	3	gene	107390648	107421863	+	1	ensembl	protein_coding	2.79043	3.04144	3.40221	1.73165	2.1187	2.6492	2.50761	2.61036	3.18115	3.42791	2.49538	3.29236	2.79067	3.34921	2.03754	2.27165	2.68002	2.37951	2.84135	3.32297
Cacna1d	16	gene	6045673	6339138	-	6	ensembl	protein_coding	5.02296	5.44852	5.508	4.1709	4.72522	5.23313	5.40154	5.43469	5.18161	5.14909	4.96788	4.97131	5.44791	5.56116	4.29672	4.90331	5.20921	5.35461	5.40832	5.15525
Ntf3	4	gene	225638802	225707718	-	4	ensembl	protein_coding	0.847227	2.10395	1.71714	0.825623	1.65677	1.79502	1.94394	2.44925	1.40125	2.18827	0.678301	2.08457	2.13224	1.7828	1.25249	2.00072	1.53339	1.70032	2.28595	1.47766
Cda	5	gene	160505257	160529504	-	1	ensembl	protein_coding	-4.3071	-2.71381	-4.21003	-3.09179	-6.43365	-6.43365	-6.43365	-3.4333	-3.43677	-2.06504	-4.80394	-3.99901	-1.97474	-4.69965	-2.50497	-7.06347	-4.77302	-7.06347	-2.69663	-2.9799
Timm13	7	gene	11844860	11845962	+	3	ensembl	protein_coding	6.26582	5.99951	6.26431	5.0617	5.30498	6.14117	6.38731	6.53043	6.36241	6.80471	6.26216	6.76436	5.9237	6.26199	5.17657	5.38673	6.1132	6.35311	6.53133	6.34921
Nop56	3	gene	129303487	129308275	+	4	ensembl	protein_coding	5.79882	5.72919	5.50616	4.43957	4.51062	5.33237	5.66958	5.64728	5.52619	5.86427	5.83537	5.77536	5.68891	5.51627	4.53995	4.57776	5.31244	5.63448	5.62181	5.5217
Giot1	7	gene	13266211	13267989	-	5	ensembl	protein_coding	-0.0584153	0.7236	0.656275	-0.69222	-0.711323	0.429329	0.435238	0.518769	0.0720648	1.00424	0.0151928	0.737012	0.579131	0.305282	-0.444429	-1.16045	0.717587	0.382656	0.64912	0.59645
Hexdc	10	gene	109993108	110011700	+	3	ensembl	protein_coding	3.03515	2.93995	3.2509	1.90313	1.99594	3.02894	3.08958	3.28942	3.02624	3.3431	3.08858	3.26933	2.86966	3.27568	2.05089	2.03697	3.04421	3.05231	3.24484	2.96988
F2rl1	2	gene	44378266	44391213	-	6	ensembl	protein_coding	-0.55288	-0.52775	-0.452148	-1.16522	-1.21386	-0.817758	-0.22731	-0.284503	-0.351799	-0.0229344	0.308856	0.338635	-0.60516	-2.24848	-1.07125	0.171579	-1.02162	-0.720825	-0.518849	-0.24904
Retnlg	11	gene	57674751	57676090	-	5	ensembl	protein_coding	-6.68358	-6.68358	-6.68358	-6.68358	-6.68358	-6.68358	-4.49618	-4.4516	-6.68358	-6.68358	-6.91168	-6.91168	-6.91168	-6.91168	-6.91168	-6.91168	-4.66341	-4.71133	-4.65995	-6.91168
Rap2c	X	gene	138277499	138290616	-	6	ensembl	protein_coding	4.23449	4.46092	4.19161	2.98666	3.37516	4.50604	4.08396	4.22822	4.25443	4.49844	4.23526	4.39932	4.44963	4.18996	3.07051	3.49285	4.55086	4.01067	4.18328	4.2376
Astn1	13	gene	80970540	81285187	+	7	ensembl_havana	processed_transcript	8.13561	8.22495	7.93001	6.95467	6.92714	8.11813	8.20666	8.11214	7.98639	7.9449	8.1646	7.80637	8.22318	7.91887	7.09328	6.99486	8.1328	8.17055	8.07763	7.95847
RGD1562485	X	gene	96321879	96336134	-	2	ensembl	protein_coding	-6.54346	-6.54346	-6.54346	-6.54346	-6.54346	-6.54346	-6.54346	-6.54346	-6.54346	-6.54346	-6.99857	-6.99857	-6.99857	-6.99857	-6.99857	-6.99857	-4.36956	-6.99857	-5.07652	-6.99857
Elf2	2	gene	159783380	159860729	-	7	ensembl	protein_coding	2.76867	3.3138	3.31287	2.04281	2.16329	3.25746	3.44761	3.26061	3.17861	3.292	2.71971	3.13999	3.31595	3.23744	2.40585	2.18938	3.31919	3.28505	3.29298	3.1322
Olr334	1	gene	236597409	236598350	+	1	ensembl	protein_coding	-3.94846	-6.2889	-6.2889	-6.2889	-6.2889	-6.2889	-6.2889	-6.2889	-6.2889	-6.2889	-5.19412	-7.21536	-7.21536	-3.85754	-7.21536	-5.04671	-7.21536	-5.21012	-5.1633	-7.21536
Atg9a	9	gene	82152061	82162643	-	6	ensembl	protein_coding	7.59742	7.56861	7.64614	6.30556	6.56095	7.40585	7.72094	7.74065	7.59075	7.77802	7.6145	7.68675	7.53631	7.66758	6.41048	6.63322	7.37464	7.69037	7.72686	7.57418
Defb30	15	gene	49987502	49989379	-	2	ensembl	protein_coding	-6.69959	-6.69959	-6.69959	-6.69959	-6.69959	-6.69959	-6.69959	-6.69959	-6.69959	-6.69959	-6.8918	-6.8918	-6.8918	-6.8918	-6.8918	-6.8918	-6.8918	-6.8918	-4.96974	-6.8918
Ptgds	3	gene	2667538	2670472	-	4	ensembl	protein_coding	6.74763	7.09887	7.12942	5.92221	6.1761	7.45491	7.37842	7.45079	7.32955	7.62389	6.65845	7.55673	7.03356	7.11904	6.05348	6.26226	7.51738	7.34277	7.44177	7.32633
En2	4	gene	433481	439314	+	5	ensembl	protein_coding	-6.01783	-3.65833	-3.82821	-6.01783	-3.17185	-1.75746	-3.11148	-2.57233	-2.57588	-2.23018	-3.08529	-2.8705	-4.05572	-3.67037	-7.51107	-2.62529	-2.56928	-3.41939	-2.78477	-2.34971
Rnft2	12	gene	45773943	45839516	+	6	ensembl	protein_coding	6.62102	6.459	6.39864	5.31275	5.39752	6.42691	6.60564	6.56761	6.43595	6.70338	6.65303	6.62042	6.4243	6.39125	5.42681	5.46221	6.41674	6.57631	6.53786	6.41948
Aaas	7	gene	141733241	141751976	-	6	ensembl	protein_coding	4.00894	4.00417	4.06842	2.80642	3.00688	3.93455	4.03318	4.11347	4.0537	4.28088	3.99995	4.19062	3.97401	4.08211	2.89987	3.09141	3.94361	3.99767	4.07179	4.05955
Sox10	7	gene	120387071	120397340	-	3	ensembl	protein_coding	6.13104	6.3986	6.66592	5.18752	5.52682	6.71414	6.6806	6.5226	6.74286	6.84161	6.06828	6.76571	6.3476	6.69813	5.28211	5.63236	6.74289	6.64038	6.47314	6.76112
Usp34	14	gene	104962650	105100491	+	6	ensembl	protein_coding	5.42707	5.71409	5.61378	4.3641	4.74808	5.7068	5.64956	5.5338	5.44488	5.48005	5.47077	5.26269	5.69712	5.64954	4.45623	4.8579	5.80577	5.63394	5.47033	5.3779
Sf3b5	1	gene	8739602	8740282	+	4	ensembl	protein_coding	5.13981	5.20596	5.37951	4.34034	4.49041	5.10381	5.41322	5.51467	5.31944	5.68438	5.10353	5.61963	5.15194	5.39869	4.47879	4.58332	5.06413	5.38411	5.50229	5.30514
Birc2	8	gene	6015753	6033822	-	5	ensembl	protein_coding	3.68824	4.00742	3.61884	2.736	3.01989	3.69897	4.16664	4.02544	3.51677	4.05885	3.75084	3.93915	3.99515	3.58181	2.83317	3.09496	3.71806	4.18751	4.00394	3.43247
Bcl2l2	15	gene	37431258	37436110	+	5	ensembl	protein_coding	7.08918	7.03852	6.79497	5.74207	5.83367	6.84543	6.96346	6.97741	6.96353	7.09162	7.13125	6.9949	7.03165	6.78954	5.85532	5.90467	6.82439	6.91258	6.93194	6.96361
Oasl2	12	gene	49263773	49276267	-	3	ensembl	protein_coding	1.20248	1.44817	1.52127	-0.222196	0.660579	1.97551	2.27072	1.40705	1.47674	1.83658	0.971372	1.66755	1.15171	1.5635	-0.049126	0.634694	2.32703	2.57207	1.23803	1.50008
Prl8a2	17	gene	41481076	41490310	-	5	ensembl	protein_coding	-6.5845	-6.5845	-6.5845	-6.5845	-6.5845	-6.5845	-6.5845	-6.5845	-6.5845	-6.5845	-6.97051	-6.97051	-6.97051	-6.97051	-6.97051	-6.97051	-6.97051	-6.97051	-5.04845	-5.03248
Scmh1	5	gene	143168705	143249138	+	4	ensembl	protein_coding	3.9517	4.06374	4.15718	3.05237	3.20042	4.10488	4.29869	4.30965	4.09646	4.2154	3.92268	4.00494	4.09637	4.18374	3.17712	3.30476	4.10518	4.27426	4.334	4.04745
Defb11	16	gene	74767480	74774364	-	1	ensembl	protein_coding	-6.79394	-6.79394	-6.79394	-6.79394	-6.79394	-3.86018	-6.79394	-6.79394	-6.79394	-6.79394	-6.81626	-6.81626	-6.81626	-6.81626	-6.81626	-6.81626	-3.65929	-6.81626	-6.81626	-6.81626
Adh1	2	gene	262090879	262102977	+	5	ensembl	protein_coding	-2.44588	-3.30296	-4.30749	-4.46663	-3.63126	-2.70293	-2.69721	-3.51948	-4.33234	-2.37081	-2.3622	-2.19333	-3.53896	-4.53219	-4.442	-3.10178	-2.32552	-2.92933	-3.7697	-4.58197
Rrs1	5	gene	14230035	14231132	-	4	ensembl	protein_coding	3.3978	3.4028	3.60454	2.41763	2.56894	3.73003	3.82947	3.94415	3.70642	4.06866	3.38424	4.12439	3.01472	3.57107	2.60714	2.70266	3.72711	3.82233	3.98748	3.72932
Dhrs1	15	gene	38313184	38320467	-	4	ensembl	protein_coding	2.64194	2.88426	3.30103	1.76871	2.0753	3.03183	3.27103	3.15689	3.098	3.54946	2.61801	3.49574	2.8103	3.34563	1.88174	2.156	3.02638	3.28264	3.06831	3.09372
Olr1458	10	gene	44534585	44535511	+	1	ensembl	protein_coding	-6.49802	-4.02861	-6.49802	-6.49802	-6.49802	-4.27868	-4.27376	-6.49802	-6.49802	-6.49802	-4.89	-7.06052	-4.6524	-3.45471	-7.06052	-7.06052	-4.8603	-4.90718	-7.06052	-7.06052
Naca	7	gene	2438021	2450436	+	7	ensembl	protein_coding	6.36159	6.72474	6.56056	5.54704	5.51961	6.60611	6.68011	6.65001	6.57414	6.8895	6.33286	6.84618	6.69552	6.52769	5.70515	5.60041	6.62902	6.63588	6.61313	6.52757
Tcf20	7	gene	123655990	123753836	-	5	ensembl	protein_coding	5.93045	6.18611	5.96622	4.84412	5.08079	6.12139	6.32466	6.09169	5.92618	5.99367	5.91043	5.86642	6.17689	5.96177	4.96401	5.19588	6.1432	6.32066	6.04599	5.88
Katnb1	19	gene	10320410	10338205	-	5	ensembl	protein_coding	5.48179	5.6167	5.53915	4.26053	4.46801	5.37299	5.68448	5.69862	5.62703	5.6716	5.50843	5.5832	5.56845	5.56204	4.34688	4.5366	5.3475	5.69852	5.6557	5.61356
Klf4	5	gene	76447645	76452001	-	3	ensembl	protein_coding	1.84114	1.37257	1.63023	0.300307	0.187393	1.89782	1.55164	2.10251	1.86702	2.46183	1.84541	2.42674	1.19596	1.69941	0.416324	0.286547	1.91495	1.48528	2.05457	1.88727
Hrh3	3	gene	181639287	181644371	+	6	ensembl	protein_coding	3.8914	2.65734	3.75262	2.19761	2.4764	3.80268	4.43637	3.72727	2.59098	4.0071	3.77627	3.93946	3.04462	3.70577	2.35104	2.38492	3.63695	4.42925	3.64171	2.62977
Slc22a2	1	gene	51394014	51435104	+	7	ensembl	protein_coding	-6.41118	-6.41118	-4.09875	-4.26187	-6.41118	-4.17168	-6.41118	-3.291	-4.12423	-6.41118	-7.09589	-7.09589	-4.71416	-3.15946	-3.42952	-7.09589	-4.11478	-7.09589	-4.11105	-4.09088
Cnih1	15	gene	27512057	27523878	-	5	ensembl	protein_coding	5.11504	5.42596	5.19542	4.38992	4.21641	5.34228	5.35459	5.3485	5.20159	5.46937	5.08238	5.3838	5.41787	5.21053	4.54415	4.28301	5.35412	5.30671	5.30295	5.17357
Chga	6	gene	135645155	135656039	+	6	ensembl	protein_coding	6.44346	6.35958	6.51626	5.40217	5.72212	6.58488	6.86299	6.79851	6.16673	7.00653	6.40546	6.94563	6.30148	6.5408	5.58435	5.76632	6.59068	6.90903	6.78833	6.03115
Olr84	1	gene	174515336	174516319	+	1	ensembl	protein_coding	-4.24417	-3.97058	-4.14566	-6.40224	-6.40224	-6.40224	-6.40224	-6.40224	-2.85503	-6.40224	-4.10416	-7.14491	-4.6885	-4.82868	-4.73852	-7.14491	-7.14491	-7.14491	-3.54579	-3.14355
Psg16	1	gene	80311450	80327327	+	2	ensembl	protein_coding	-4.86854	-6.92445	-6.92445	-4.16986	-4.89102	-4.07615	-4.07101	-6.92445	-2.6887	-4.80862	-4.21442	-6.59626	-6.59626	-6.59626	-4.00749	-4.04071	-4.18182	-4.23327	-3.28452	-6.59626
Fam110a	3	gene	153826435	153829327	-	1	ensembl	protein_coding	2.7312	2.61907	2.82337	1.56298	1.30849	2.76334	3.33754	3.03978	2.7712	3.13361	2.71233	2.9929	2.51181	2.93568	1.74587	1.45266	2.72682	3.19672	3.00719	2.8086
Zfp458	2	gene	106640560	106649928	+	5	ensembl	protein_coding	-1.40254	0.324008	-0.549915	-3.48258	-1.6485	-0.0186465	-0.417641	-0.275286	-1.32102	-0.205253	-1.08919	-1.07231	-0.0467538	0.0375148	-2.3915	-1.51361	-0.179637	-0.754164	0.0118724	-1.99958
Stx8	10	gene	54258230	54498841	+	4	ensembl	protein_coding	4.00199	4.22727	4.10516	3.07919	3.29719	4.06441	4.25433	4.36142	4.08121	4.52887	3.93127	4.46059	4.24297	4.12271	3.18812	3.40385	4.04156	4.16046	4.40579	4.04374
Cd3eap	1	gene	81533986	81537262	-	5	ensembl	protein_coding	2.94539	2.75196	2.84525	1.64126	1.99308	2.83503	2.84087	3.00213	2.90735	3.39554	3.00066	3.39491	2.53382	2.8865	1.69372	2.02879	2.84959	2.8338	3.01673	2.91936
Olr363	1	gene	237360124	237406801	+	2	ensembl	protein_coding	-6.43485	-6.43485	-6.43485	-6.43485	-6.43485	-6.43485	-6.43485	-6.43485	-6.43485	-6.43485	-5.17966	-4.50523	-7.07284	-7.07284	-7.07284	-7.07284	-5.15375	-7.07284	-7.07284	-7.07284
Irx5	19	gene	27491960	27494654	+	2	ensembl	protein_coding	-5.85952	-5.85952	-1.71591	-5.85952	-5.85952	-3.7218	-5.85952	-5.85952	-5.85952	-2.89626	-3.67939	-4.11154	-5.20906	-2.77151	-7.74295	-7.74295	-4.03444	-4.62651	-5.42425	-4.00801
Sfta2	20	gene	5701903	5702628	-	1	ensembl	protein_coding	-6.50654	-6.50654	-6.50654	-6.50654	-6.50654	-6.50654	-4.32227	-4.27776	-6.50654	-3.48546	-7.06576	-4.05192	-4.60029	-7.06576	-7.06576	-7.06576	-4.81314	-4.86115	-3.97598	-7.06576
Larp6	8	gene	65362299	65382759	+	6	ensembl	protein_coding	4.67208	5.0725	4.75015	3.7747	4.20659	4.83214	4.9715	5.13444	5.16341	5.22362	4.61813	5.14657	5.05719	4.72607	3.89301	4.33524	4.80241	4.93226	5.11456	5.17568
Nvl	13	gene	104407045	104464514	-	5	ensembl	protein_coding	2.64618	2.7337	2.65225	1.39391	1.73407	2.90444	2.79898	2.67205	2.48568	2.83525	2.6808	2.72715	2.67885	2.60585	1.5008	1.83648	3.00053	2.74233	2.67007	2.41363
Arf5	4	gene	55463191	55466117	+	2	ensembl	protein_coding	7.29003	7.15201	7.3637	6.183	6.23556	7.23308	7.50023	7.50606	7.43251	7.68871	7.27577	7.62812	7.08483	7.37607	6.30336	6.3268	7.20894	7.46371	7.48661	7.43068
Pdia5	11	gene	71580311	71666271	+	4	ensembl	protein_coding	-2.65832	-1.31178	-1.50766	-2.3796	-2.06475	-1.78108	-1.0134	-1.08271	-2.57789	-0.671163	-1.9767	-1.12963	-1.51151	-1.69577	-2.49102	-2.5309	-1.32039	-0.73208	-1.21729	-2.44306
St5	1	gene	181125790	181275226	-	6	ensembl	protein_coding	4.28261	4.66597	4.64766	3.4377	3.79581	4.80977	4.99322	4.64888	4.43535	4.63816	4.2261	4.49907	4.64194	4.66702	3.56819	3.93128	4.83704	4.99491	4.61483	4.37475
Lrch1	15	gene	60507567	60691597	-	6	ensembl	protein_coding	2.17928	2.18847	2.04735	0.995908	1.36557	2.3602	2.32136	2.1466	1.88026	2.22401	2.1706	2.0896	2.10122	2.05315	1.1317	1.39736	2.43227	2.32696	2.15953	1.84661
Prr16	18	gene	45166704	45370225	+	3	ensembl	protein_coding	-0.848111	0.503997	0.705215	-0.435867	-0.245466	0.430262	0.721924	0.546979	0.486432	0.502084	-1.0753	0.475746	0.562832	0.877465	-0.0201951	-0.283257	0.293232	0.651191	0.563932	0.321806
Cryl1	15	gene	41389716	41509443	-	4	ensembl	protein_coding	5.11031	4.94274	4.73921	3.85987	3.4764	4.52214	4.69656	4.87012	5.01918	5.00354	5.16406	4.92874	4.91183	4.74694	4.04061	3.50332	4.45481	4.60938	4.83885	5.04152
Ppbp	14	gene	18762075	18762879	-	2	ensembl	protein_coding	-4.64386	-4.64386	-2.41567	-4.64386	-4.64386	-4.64386	-4.64386	-4.64386	-4.64386	-4.64386	-4.01357	-3.60884	-3.55062	-5.23542	-3.77711	-5.16625	-5.84956	-4.03546	-4.62405	-4.3495
Dnajc8	5	gene	154393926	154411983	+	5	ensembl	protein_coding	5.63482	5.85677	5.55288	4.55402	4.90959	5.53818	5.74331	5.77207	5.76341	6.07	5.62351	6.02797	5.83496	5.53245	4.67169	5.0129	5.4989	5.69324	5.74828	5.75115
Med11	10	gene	56814847	56816361	+	5	ensembl	protein_coding	1.84559	1.6395	2.06133	0.775	1.18824	2.07637	2.30082	2.02358	1.99604	2.22323	1.93437	2.00204	1.68543	2.14432	0.633185	1.35695	2.18049	2.3083	2.01739	1.86723
Ms4a4c	1	gene	234714289	234725777	+	5	ensembl	protein_coding	-6.61663	-2.85357	-4.36717	-6.61663	-6.61663	-3.63623	-4.43329	-4.38879	-4.39196	-6.61663	-6.90575	-6.90575	-3.05121	-3.73783	-6.90575	-6.90575	-3.81808	-4.69988	-3.81421	-3.79333
Il17rd	16	gene	2643153	2704143	+	1	ensembl	protein_coding	0.281146	0.186806	0.435874	-1.32312	-1.73	0.998883	0.908471	0.112368	0.584426	0.468119	0.456529	0.225894	0.0339263	0.37045	-1.14174	-1.57742	1.09473	0.932273	0.108613	0.419712
Dmd	X	gene	53540769	53697914	+	1	ensembl	protein_coding	2.65716	2.98326	3.11608	1.15888	1.73152	3.47072	3.02979	2.77057	3.05955	3.29292	2.77252	3.07402	2.91137	2.95971	1.4514	1.81742	3.52437	3.04227	2.71308	3.00432
Epb41l1	3	gene	161714741	161743440	+	1	ensembl	protein_coding	7.23921	7.45461	7.14377	6.04861	6.37408	7.20379	7.5772	7.44414	7.19427	7.334	7.3052	7.13151	7.36292	7.18928	6.15028	6.34894	7.25963	7.65031	7.42712	7.1885
Exosc2	3	gene	15511096	15521359	-	5	ensembl	protein_coding	3.18045	3.57397	3.40565	2.24035	2.47459	3.46901	3.51881	3.50235	3.11967	3.42652	3.14634	3.33206	3.57207	3.42452	2.38108	2.58377	3.44141	3.4873	3.49883	3.04399
Zadh2	18	gene	79987672	79997023	+	6	ensembl	protein_coding	3.23975	3.67586	3.75684	2.15601	2.84674	3.73813	3.77066	3.78683	3.67305	4.04277	3.19392	3.96152	3.65782	3.78632	2.21984	2.92696	3.74917	3.79677	3.75385	3.64046
B3galt2	13	gene	65424610	65433621	+	3	ensembl	protein_coding	4.10392	4.12669	4.00391	2.67692	2.83126	4.07441	4.17726	4.00497	4.09165	4.11926	4.11976	4.00617	4.12924	4.02793	2.77349	2.89273	4.09431	4.13389	3.95241	4.0803
Uaca	8	gene	65436328	65524224	+	6	ensembl	protein_coding	2.01451	2.24979	2.04791	1.24574	1.07774	2.30603	2.23436	1.9853	1.87682	2.52351	2.02136	2.46648	2.20939	2.08664	1.32771	1.12153	2.2768	2.15753	1.99355	1.90071
LOC500354	4	gene	235077941	235079342	+	3	ensembl	protein_coding	-3.10579	-2.59441	-3.47951	-4.16598	-3.45878	-3.91353	-2.99043	-3.50916	-3.85009	-3.01858	-1.36674	-2.13113	-4.0674	-4.0674	-4.0674	-4.0674	-4.0674	-2.11655	-4.0674	-4.0674
Tfap2a	17	gene	26596839	26611553	+	6	ensembl	protein_coding	-2.08298	-1.63452	-0.983851	-2.15646	-3.29232	-1.92497	-1.26859	-1.21471	-1.75492	-1.66221	-1.67635	-1.71883	-1.63536	-1.54971	-2.4012	-1.2594	-0.915979	-1.12647	-2.58879	-3.10344
Cebpa	1	gene	92493857	92495245	+	4	ensembl	protein_coding	3.14928	2.8268	3.73081	1.92956	2.4361	3.35288	3.76107	3.50422	3.6147	3.86619	3.1018	3.79342	2.69688	3.77151	2.0868	2.5804	3.32096	3.75847	3.46186	3.59951
Casp12	8	gene	2682098	2708341	+	4	ensembl	protein_coding	-3.64064	-6.56126	-3.03229	-3.70764	-6.56126	-2.46416	-2.45845	-3.5563	-4.35876	-2.18594	-3.2746	-2.3742	-6.89972	-2.76551	-3.58603	-6.89972	-2.54664	-2.35385	-3.23469	-4.59174
Sult1d1	14	gene	22022302	22040897	+	7	ensembl	protein_coding	1.61619	1.82312	1.40453	0.15291	0.545927	2.17985	1.90359	1.47376	1.87468	2.33826	1.45882	2.19172	1.86964	1.39224	0.386289	0.575989	2.35218	1.84671	1.45162	1.78762
Ccl1	10	gene	69169282	69172142	-	4	ensembl	protein_coding	-6.37102	-6.37102	-3.38289	-4.32879	-6.37102	-6.37102	-6.37102	-3.40628	-4.198	-2.57021	-4.03723	-3.14587	-7.19556	-3.91909	-4.69612	-7.19556	-7.19556	-4.05758	-3.45726	-4.84144
Abcd1	1	gene	152823436	152844829	-	5	ensembl	protein_coding	3.9083	3.91421	3.99211	2.79861	2.64492	4.12079	4.358	4.21766	3.90367	4.22606	3.91486	4.14179	3.86477	4.00235	2.92658	2.69222	4.13104	4.36234	4.17723	3.87115
Surf6	3	gene	10803319	10814066	-	4	ensembl	protein_coding	4.20556	4.25766	4.02569	2.87194	3.10394	4.30103	4.41372	4.30138	4.19368	4.44376	4.18846	4.38059	4.26593	3.99011	2.99042	3.16446	4.32809	4.38638	4.26819	4.15574
Mir105	1	gene	148316256	148316328	-	1	ensembl	miRNA	-6.81374	-6.81374	-6.81374	-6.81374	-6.81374	-6.81374	-6.81374	-6.81374	-6.81374	-6.81374	-6.81374	-6.81374	-6.81374	-6.81374	-6.81374	-6.81374	-6.81374	-6.81374	-6.81374	-6.81374
Serpinf2	10	gene	61978965	61987049	-	5	ensembl	protein_coding	-2.33762	-0.903358	-1.47627	-2.40786	-1.77	-0.592533	-0.731501	-1.13057	-1.65625	-1.25932	-2.13923	-1.66317	-0.9196	-1.64078	-2.38203	-1.41008	-0.481631	-0.617523	-1.30632	-1.7049
Axl	1	gene	83812118	83840542	-	6	ensembl	protein_coding	3.88669	3.80795	4.05556	2.61551	2.5674	4.39766	4.59489	4.15623	4.10911	4.2188	3.90123	4.12859	3.7471	4.06582	2.84943	2.59438	4.38714	4.61244	4.06745	4.05621
N4bp2l2	12	gene	613303	634435	-	5	ensembl	protein_coding	3.18126	3.65792	3.23691	2.17704	2.63842	3.42047	3.459	3.31003	3.39772	3.56981	3.14119	3.48022	3.66502	3.2291	2.29615	2.74868	3.43657	3.4188	3.27905	3.35381
Med12l	2	gene	168632572	168735461	+	6	ensembl	protein_coding	2.33042	2.82252	2.26729	1.15126	1.91778	2.24938	2.38011	2.40621	2.42978	2.49578	2.25141	1.90369	2.68538	2.35272	1.35629	1.8114	2.64172	2.66969	2.27938	2.49886
Cdkl3	10	gene	37231600	37315393	+	6	ensembl	protein_coding	2.13316	2.62609	2.47498	1.06877	1.23359	2.60891	2.19456	2.36816	2.35388	2.77029	2.06227	2.73034	2.48301	2.56778	1.25903	1.29926	2.67994	2.24527	2.27874	2.22674
Ube3a	1	gene	117746227	117834011	+	6	ensembl	protein_coding	4.07586	4.05396	4.14669	2.85774	3.2022	4.17418	4.04677	3.94065	4.06621	4.10252	4.07555	3.94246	4.01605	4.17945	2.96505	3.39014	4.17339	3.9532	3.90115	4.07033
Gprc5b	1	gene	195631489	195656026	-	6	ensembl	protein_coding	6.83208	6.93167	7.26997	5.81955	5.89226	7.5363	7.50988	7.10089	7.17826	7.44934	6.78059	7.36265	6.87114	7.29694	5.93783	5.96028	7.60524	7.50283	7.04182	7.16087
Nat2	16	gene	23845267	23875348	-	1	ensembl	protein_coding	-1.39311	-1.31299	-1.95934	-3.64605	-2.51544	-0.995531	-1.25413	-2.40229	-1.6718	-1.32023	-1.44181	-1.64707	-1.45934	-2.07505	-2.98074	-2.59991	-0.78341	-1.18875	-2.76394	-1.53089
Oaz3	2	gene	215154623	215157553	-	5	ensembl	protein_coding	-1.69766	-1.7499	-4.00992	-2.95258	-2.91228	-2.51448	-1.82634	-1.77616	-1.46781	-2.81895	-1.87178	-2.81654	-2.17049	-2.97072	-3.28266	-3.32213	-2.21727	-1.89596	-1.82539	-1.35313
Gin1	9	gene	110750665	110770943	-	7	ensembl_havana	protein_coding	1.17089	1.79833	1.52999	0.746665	0.843836	1.52877	1.65655	1.61873	1.50085	2.16398	1.08028	2.1019	1.86708	1.47668	0.912437	0.901834	1.51153	1.58452	1.6549	1.46742
Arntl	1	gene	185007568	185105409	+	7	ensembl	protein_coding	4.11366	4.3707	4.39107	3.30871	3.24477	4.25194	4.47277	4.29113	4.35745	4.52289	4.08949	4.43441	4.3419	4.4253	3.45153	3.29289	4.27529	4.44083	4.22696	4.34648
Lep	4	gene	56085079	56099209	+	1	ensembl	protein_coding	-3.47164	-2.66938	-4.16291	-6.38253	-6.38253	-2.94598	-3.43635	-4.18424	-4.18736	-6.38253	-3.10093	-4.90093	-3.20439	-3.90395	-7.13158	-7.13158	-4.8352	-3.50999	-3.06001	-3.42689
Sec23a	6	gene	89586788	89633108	-	5	ensembl	protein_coding	6.17654	6.25323	5.95819	4.79801	4.87517	6.01024	6.10292	6.05893	6.06083	6.07603	6.20988	5.95732	6.25422	5.94398	4.9248	4.92845	6.02819	6.06757	6.01753	6.03815
Smarcc1	8	gene	117561617	117675013	+	6	ensembl	protein_coding	4.92619	5.0659	5.03521	3.65671	4.16808	5.08957	5.2449	5.11611	5.03489	5.13941	4.89181	5.06705	5.01493	5.04573	3.75548	4.26457	5.11183	5.22631	5.07907	5.02017
Pcdh18	2	gene	158301955	158315635	-	5	ensembl	protein_coding	1.46252	1.21422	1.01179	-0.203275	-0.680881	1.32597	1.33173	1.16898	0.58444	1.10923	1.48033	0.994015	1.26358	1.02541	-0.112101	-0.56947	1.30684	1.26251	1.11034	0.563272
RGD1566099	13	gene	60907257	60912445	-	1	ensembl	protein_coding	2.79743	2.96234	2.61594	1.67079	2.18791	2.38285	2.67586	2.61714	2.76812	3.22799	2.85471	3.07536	2.54198	2.74463	1.93247	1.82262	2.62292	2.86168	2.72413	2.72587
Mboat7	1	gene	63093299	63106717	+	3	ensembl	protein_coding	6.35231	5.95839	6.02994	4.94098	4.94516	5.86104	6.44246	6.3579	6.341	6.30973	6.31425	6.30218	6.02288	6.10489	5.08526	5.02785	5.87426	6.35367	6.21758	6.23609
RGD1564854	3	gene	19256352	19275220	+	4	ensembl	protein_coding	-6.02575	-3.38205	-6.02575	-6.02575	-6.02575	-6.02575	-6.02575	-6.02575	-6.02575	-6.02575	-7.41977	-4.21347	-5.18251	-5.31018	-7.41977	-4.48699	-4.61949	-7.41977	-7.41977	-4.12206
Rfng	10	gene	109555217	109558316	-	1	ensembl	protein_coding	5.78146	5.59212	5.83234	4.56104	4.48308	5.72423	6.06504	5.92163	5.77307	5.98779	5.77729	5.90678	5.61134	5.80774	4.79018	4.51842	5.71382	5.99412	5.83624	5.76585
Rasa2	8	gene	103860860	103988460	-	5	ensembl	protein_coding	1.97464	2.1361	2.09107	0.608573	1.13579	2.51055	2.24194	1.77325	2.00368	2.00286	2.02822	1.86539	2.12701	2.07777	0.761766	1.22844	2.55598	2.21295	1.66413	1.95679
Psg19	1	gene	80956304	80965005	-	6	ensembl	protein_coding	-3.76787	-2.99189	-2.68883	-4.43256	-4.57417	-3.40749	-3.60904	-4.08222	-3.44652	-3.2663	-2.21651	-4.24994	-4.24994	-4.24994	-4.24994	-2.06821	-4.24994	-2.2326	-4.24994	-4.24994
Olr1767	X	gene	137078085	137079008	-	3	ensembl	protein_coding	-6.65355	-6.65355	-6.65355	-6.65355	-6.65355	-6.65355	-6.65355	-6.65355	-6.65355	-6.65355	-6.92328	-6.92328	-6.92328	-4.22594	-6.92328	-6.92328	-6.92328	-6.92328	-6.92328	-6.92328
Csad	7	gene	141579062	141607052	-	5	ensembl	protein_coding	4.56422	4.57135	4.69503	3.22543	3.63175	4.60622	4.8328	4.7551	4.64936	5.06137	4.65538	5.01331	4.42861	4.66803	3.30634	3.72656	4.68715	4.79827	4.70484	4.60415
Rnase11	15	gene	31806255	31808240	-	2	ensembl	protein_coding	-6.49596	-6.49596	-4.29211	-6.49596	-3.63149	-6.49596	-3.07836	-4.31329	-6.49596	-6.49596	-7.08012	-4.82596	-4.54026	-4.6852	-7.08012	-3.20677	-7.08012	-3.95634	-4.75596	-7.08012
Acrbp	4	gene	224581828	224585861	+	6	ensembl	protein_coding	-1.06831	-1.73245	-1.16617	-1.91617	-2.28924	-0.255908	-0.936971	-0.885415	-1.76256	-0.813821	-1.28664	-0.750455	-1.70476	-1.27099	-1.97263	-2.01302	-0.238465	-1.1971	-0.922012	-1.47094
Taf1d	8	gene	13802188	13810920	+	5	ensembl	protein_coding	1.01438	1.03758	1.51996	-0.104691	0.551394	1.5298	1.13627	1.61712	1.39106	1.41276	0.89393	1.19587	0.983842	1.63301	0.0172085	0.907042	1.41457	1.12673	1.59485	1.33859
Clic2	20	gene	289420	304438	+	5	ensembl	protein_coding	-1.92513	-0.729486	-1.12701	-1.82761	-3.47188	-1.10733	-1.31507	-2.25835	-1.84048	-0.970906	-2.1428	-1.15267	-0.683185	-0.97082	-1.69366	-3.16924	-1.06634	-1.49289	-2.32599	-1.87565
Gda	1	gene	246270809	246346023	-	5	ensembl	protein_coding	5.16293	5.37182	5.13309	3.83671	3.86167	4.84814	5.17865	4.91817	4.55535	4.77614	5.19286	4.62275	5.3751	5.16108	4.01586	3.95022	4.84005	5.16602	4.8483	4.47044
Ugt2b10	14	gene	22705080	22724392	+	1	ensembl	protein_coding	-6.38849	-6.38849	-6.38849	-6.38849	-6.38849	-6.38849	-6.38849	-6.38849	-6.38849	-6.38849	-7.10455	-7.10455	-7.10455	-7.10455	-7.10455	-7.10455	-7.10455	-5.22635	-4.47224	-4.45446
Prkce	6	gene	9404742	9883579	+	6	ensembl	protein_coding	8.29868	8.33188	8.24482	6.95617	7.23162	8.39817	8.43545	8.35792	8.37102	8.2905	8.30493	8.16547	8.33399	8.23714	7.06161	7.30659	8.4187	8.40346	8.32318	8.36114
Rrnad1	2	gene	206697126	206705708	-	4	ensembl	protein_coding	3.50685	3.30525	3.5337	2.26647	2.37407	3.37543	3.55999	3.61631	3.61628	3.73681	3.49349	3.62809	3.2884	3.54652	2.41402	2.42743	3.2804	3.5605	3.59092	3.6614
Ppp1r12b	13	gene	56637005	56836014	-	6	ensembl	protein_coding	6.24491	6.43057	6.2843	5.11912	5.31691	6.41434	6.57272	6.31775	6.27855	6.24775	6.27736	6.09504	6.42499	6.27695	5.20767	5.39486	6.46489	6.56589	6.26626	6.25299
Fgfbp1	14	gene	71679816	71680896	+	4	ensembl	protein_coding	-6.69182	-6.69182	-3.65858	-6.69182	-6.69182	-2.87501	-4.52698	-6.69182	-4.48599	-2.83363	-6.84174	-2.8799	-6.84174	-3.10427	-6.84174	-6.84174	-2.49796	-4.60978	-6.84174	-4.53869
Tenm4	1	gene	167615228	168094355	+	6	ensembl	protein_coding	5.90926	5.49634	5.36741	4.3357	3.84717	5.18901	5.65284	5.11837	5.29441	5.0762	5.98761	4.92697	5.46422	5.36742	4.52007	3.87984	5.15738	5.62809	5.08747	5.26763
Fshb	3	gene	104700144	104703951	-	5	ensembl	protein_coding	-6.05523	-6.05523	-6.05523	-3.74577	-6.05523	-6.05523	-6.05523	-6.05523	-6.05523	-6.05523	-5.38991	-4.21386	-4.40408	-7.38313	-5.21674	-7.38313	-7.38313	-7.38313	-4.14297	-5.3427
Exoc8	19	gene	68360729	68362879	-	2	ensembl	protein_coding	5.03702	4.92961	5.02598	3.92899	3.86928	5.38475	5.41771	5.25191	4.97214	5.22242	5.00599	5.11445	4.86061	5.01773	4.04116	3.95563	5.45884	5.42824	5.20135	4.9558
Pea15	13	gene	95100951	95110571	-	1	ensembl	protein_coding	8.71923	8.96764	8.73208	7.81827	7.73208	8.80289	8.91512	8.92987	8.80459	9.00111	8.70116	8.92397	8.96129	8.72414	7.96159	7.78976	8.8092	8.87138	8.90311	8.77725
Ckap2	16	gene	74383677	74410206	+	5	ensembl	protein_coding	-1.93815	-3.47978	-1.61174	-5.70181	-3.75134	-0.952547	-0.84029	-2.45705	-1.45248	-1.15849	-2.69976	-1.63223	-2.89847	-1.68665	-4.3798	-3.80643	-0.877992	-0.871572	-2.43822	-2.05256
Six3	6	gene	8811894	8814540	+	5	ensembl	protein_coding	-1.50057	-0.904733	-0.720053	-1.72388	-2.02221	-1.46581	-0.491475	-0.934423	-1.5534	-0.952089	-1.30357	-1.45954	-0.914394	-0.640852	-2.89136	-1.35732	-0.969945	-0.576101	-1.37938	-0.776177
Gpr149	2	gene	172232556	172307498	-	3	ensembl	protein_coding	0.0667907	0.316685	0.667048	-1.05133	-0.93295	0.934862	0.611844	0.192186	0.345956	0.106981	0.123276	-0.0424855	-0.111119	0.790252	-0.448527	-0.821357	1.26527	0.670787	0.109434	-0.277454
Cdhr5	1	gene	221172658	221181061	-	6	ensembl	protein_coding	-1.45341	-1.59515	-0.656154	-1.80855	-1.48115	-1.42139	-0.660121	-1.13015	-1.3675	-0.859306	-1.47302	-0.623703	-1.63188	-1.33854	-1.36386	-1.01168	-0.969533	-0.845728	-1.29864	-1.8763
LOC367195	8	gene	131181081	131181491	-	1	ensembl	protein_coding	2.09737	2.45391	2.23364	0.955678	1.31252	2.3323	2.49664	2.48038	2.01909	2.53237	1.82558	2.44278	2.5391	2.03504	1.23271	1.41795	2.46072	2.31674	2.40376	2.23953
Fastkd1	3	gene	62537420	62563261	-	5	ensembl	protein_coding	2.50766	2.65102	2.79311	1.40258	1.3942	2.59396	2.63678	2.51803	2.49751	2.56663	2.52027	2.44684	2.63776	2.83434	1.56588	1.40361	2.59665	2.59876	2.46599	2.49139
Spata2L	19	gene	66737483	66741950	-	5	ensembl	protein_coding	6.80001	6.72168	6.81462	5.65432	5.87168	6.61697	7.04021	7.01575	6.93271	7.14616	6.78858	7.0682	6.67665	6.80765	5.76532	5.99106	6.57695	7.00874	6.99153	6.93945
Adh5	2	gene	262262880	262275335	+	4	ensembl	protein_coding	5.19701	5.3464	5.18043	4.21977	4.23725	5.22815	5.32972	5.32987	5.15671	5.51094	5.19675	5.43279	5.32619	5.17595	4.35851	4.2937	5.24317	5.28535	5.31013	5.11371
Cep95	10	gene	94734062	94762044	+	5	ensembl	protein_coding	2.12521	2.69328	2.86537	1.4948	1.88502	2.78838	2.55159	2.55734	2.54571	2.77859	2.06515	2.66792	2.70536	2.92757	1.63273	2.06422	2.7736	2.47515	2.54655	2.42702
Nt5e	8	gene	95464241	95508297	+	5	ensembl	protein_coding	2.869	3.42825	3.17088	1.63465	2.33523	3.83156	3.59764	3.39369	2.98785	3.47957	2.72057	3.45315	3.27246	3.18376	1.82593	2.34858	4.00535	3.63884	3.3509	2.92877
Cabyr	18	gene	4076915	4088623	+	1	ensembl	protein_coding	0.510114	0.604345	0.624926	-0.318021	-0.401533	0.436989	0.792452	0.565694	0.754402	1.10314	0.648757	0.906662	0.560172	0.662185	-0.264096	-0.305636	0.563226	0.654646	0.464974	0.781617
Rnf13	2	gene	167261840	167446313	+	4	ensembl	protein_coding	5.31297	5.58031	5.47309	4.27737	4.32211	5.69136	5.47444	5.38655	5.47325	5.67372	5.23745	5.60872	5.65379	5.45345	4.41977	4.36207	5.72406	5.4276	5.32714	5.4511
Rara	10	gene	86663849	86681847	+	6	ensembl	protein_coding	2.81498	2.81944	3.02006	1.71672	2.59773	2.89246	3.38184	3.19191	2.95993	3.55826	2.79455	3.52589	2.75887	3.00953	1.78477	2.74818	2.88501	3.35642	3.16129	2.9288
Vav1	9	gene	8626680	8682495	-	1	ensembl	protein_coding	1.21181	1.17505	1.70867	0.180837	-0.0263983	2.12115	2.14559	1.37469	1.48731	1.84601	1.20993	1.68592	1.13954	1.62114	0.163427	0.176159	2.16175	2.18325	1.38806	1.49554
Pramel	X	gene	105823281	105826023	+	2	ensembl	protein_coding	-6.47061	-6.47061	-6.47061	-6.47061	-6.47061	-6.47061	-6.47061	-6.47061	-6.47061	-6.47061	-7.04839	-7.04839	-7.04839	-5.06783	-7.04839	-7.04839	-5.1293	-5.17019	-7.04839	-7.04839
Lrrfip1	9	gene	97871992	97939937	+	6	ensembl	protein_coding	2.79874	2.83102	2.95464	1.4406	2.01464	2.8775	2.84362	3.16736	2.89913	3.11238	2.73381	3.05911	2.77633	3.01937	1.58072	2.09442	2.88085	2.75949	3.15857	2.87698
Ap1s3	9	gene	85139124	85197998	-	1	ensembl	protein_coding	1.10471	1.14435	0.476517	-0.438649	0.04166	1.219	0.888451	1.1534	0.715262	1.20058	1.12293	1.07684	1.14452	0.477431	-0.451989	0.21771	1.27316	0.826987	1.09894	0.718754
Efcab2	13	gene	100744214	100849978	+	1	ensembl	protein_coding	0.766471	1.33624	0.844292	-0.629788	0.277837	1.14128	0.941879	1.08538	1.06413	0.822325	1.1331	0.760892	0.961344	0.974189	-0.48252	-0.00166802	1.48897	0.782469	1.23483	0.798436
Tysnd1	20	gene	33110493	33116211	+	2	ensembl	protein_coding	4.38615	4.19931	4.37548	3.09889	3.20691	4.39512	4.64868	4.61064	4.49046	4.68505	4.37941	4.60254	4.12343	4.37309	3.20599	3.28925	4.38148	4.64153	4.60073	4.49923
Rpl9	14	gene	44343829	44347026	+	4	ensembl_havana	protein_coding	5.0804	5.58257	4.98369	4.37377	4.3626	5.2859	5.17112	5.36599	5.24182	5.57324	5.04099	5.51708	5.50848	5.03256	4.47322	4.48771	5.28352	5.13107	5.30299	5.24348
Gtf2e2	16	gene	61778124	61826935	-	6	ensembl	protein_coding	3.01675	3.26353	2.50901	1.86588	1.95891	2.9485	2.87627	2.85915	2.98566	3.27216	3.04363	3.20213	3.29965	2.41945	2.01919	2.03462	2.96114	2.81872	2.79338	2.96392
Mark3	6	gene	144287323	144374797	-	6	ensembl	protein_coding	5.73364	5.98725	5.84122	4.80463	4.84906	5.89648	5.95661	5.93169	5.73262	6.01018	5.71202	5.92044	5.95834	5.84109	4.9039	4.93192	5.92968	5.92518	5.91267	5.70815
Nedd4l	18	gene	59776172	59921504	+	6	ensembl	protein_coding	5.90593	6.29218	5.92363	4.73433	5.10201	6.08178	6.30473	6.1994	5.70201	6.01393	5.89185	5.86264	6.31185	5.93331	4.86875	5.19782	6.10588	6.30314	6.17817	5.60653
Fcar	1	gene	75285478	75318514	+	5	ensembl	protein_coding	-5.19263	-8.04649	-3.07412	-5.25809	-4.38071	-3.81236	-4.67187	-3.98622	-4.62573	-3.77117	-2.96875	-5.3032	-5.3032	-1.42506	-5.3032	-5.3032	-5.3032	-5.3032	-5.3032	-5.3032
Olr1584	13	gene	96618117	96619061	+	2	ensembl	protein_coding	-6.69864	-6.69864	-6.69864	-6.69864	-6.69864	-6.69864	-6.69864	-6.69864	-6.69864	-6.69864	-6.89244	-6.89244	-6.89244	-6.89244	-6.89244	-6.89244	-6.89244	-6.89244	-6.89244	-4.95442
Olr1499	10	gene	60310944	60488720	-	1	ensembl	protein_coding	-6.69612	-6.69612	-6.69612	-6.69612	-6.69612	-6.69612	-6.69612	-6.69612	-6.69612	-6.69612	-6.89417	-6.89417	-6.89417	-4.91361	-6.89417	-6.89417	-6.89417	-6.89417	-6.89417	-6.89417
Galnt13	3	gene	45130269	45710879	+	6	ensembl	protein_coding	0.312915	0.705695	0.53717	-1.51402	-0.206262	0.452819	1.13955	0.789082	0.0625011	0.879284	0.214297	0.752276	0.692628	0.583103	-1.45251	-0.121216	0.487495	1.12889	0.814709	0.0590591
Olr823	4	gene	214423986	214424912	+	2	ensembl	protein_coding	-6.13557	-6.13557	-6.13557	-4.02294	-6.13557	-6.13557	-3.11857	-6.13557	-6.13557	-6.13557	-7.42428	-5.2648	-4.9911	-7.42428	-4.20096	-7.42428	-5.20116	-3.91823	-5.19774	-5.17924
Col13a1	20	gene	33254962	33395041	-	6	ensembl	protein_coding	-1.34091	-1.04622	-0.39451	-5.46006	-2.35821	-1.97263	0.139093	-0.827246	-0.512203	-0.349695	-0.995712	-0.975205	-2.03527	-0.637576	-4.06829	-1.84759	-1.36187	-0.221306	-1.45249	-0.527304
Vdr	7	gene	139536241	139585928	-	3	ensembl	protein_coding	-1.60872	-1.49497	-1.68873	-2.70741	-3.88801	-1.57754	-0.700757	-1.93817	-1.21059	-1.37047	-1.37702	-1.76637	-1.52866	-1.71485	-3.5489	-2.83285	-1.55567	-0.881847	-1.67384	-1.30537
Gapdhs	1	gene	90334994	90349297	-	5	ensembl	protein_coding	0.599527	0.545706	1.03076	-0.352675	-0.309211	0.850965	0.922178	1.23372	0.870766	1.5394	0.535022	1.50863	0.672281	0.962674	-0.235051	-0.0429001	0.603193	0.706775	1.20086	1.01965
Clic1	20	gene	7113249	7122091	+	4	ensembl	protein_coding	2.96217	3.29522	3.35612	1.81217	1.89685	3.72487	3.7408	3.30136	3.48456	3.90862	2.94306	3.85369	3.23301	3.34438	1.93934	1.92771	3.77131	3.73665	3.26864	3.46494
Apaf1	7	gene	31792818	31872984	-	5	ensembl	protein_coding	3.07013	3.51363	3.01927	1.75642	2.17088	3.26943	3.32197	3.15822	3.20752	3.29827	3.09769	3.00212	3.38603	2.86943	1.75091	2.39337	3.47894	3.47157	3.16739	3.1683
Tfip11	12	gene	52077899	52090133	-	4	ensembl	protein_coding	5.17698	5.33212	5.27467	4.16175	4.44894	5.26143	5.53659	5.44503	5.36308	5.5244	5.14306	5.45825	5.26004	5.2559	4.32799	4.57288	5.205	5.49683	5.444	5.36104
Tbr1	3	gene	54349276	54356654	+	5	ensembl	protein_coding	3.56937	3.78809	4.05054	2.8173	3.29106	3.93604	4.34845	4.35391	4.09896	4.2832	3.4743	4.24829	3.73966	4.08824	2.89278	3.423	3.90526	4.32136	4.35344	4.09058
Vangl2	13	gene	94905108	94928701	-	5	ensembl	protein_coding	1.4641	2.82231	2.72458	1.50757	1.79995	2.39846	2.81082	2.93361	2.18035	2.35917	1.38123	2.12064	2.82724	2.75345	1.72472	1.92442	2.3629	2.83325	2.94995	2.12314
Oaz2	8	gene	70899390	70913165	+	5	ensembl	protein_coding	7.13454	7.13921	6.94338	5.99038	5.99312	6.94462	7.10098	7.19234	7.04342	7.37451	7.14862	7.30679	7.1324	6.93147	6.1172	6.06706	6.92138	7.04556	7.17057	7.01547
Mypop	1	gene	81159192	81169783	+	4	ensembl	protein_coding	5.02781	4.80557	5.08377	3.70864	4.24171	4.85485	5.28537	5.13255	5.08568	5.45578	5.05297	5.37265	4.75314	5.07313	3.89327	4.26249	4.83162	5.29262	5.08852	5.06135
Sytl3	1	gene	48534303	48590470	+	5	ensembl	protein_coding	-2.12563	-2.32016	-2.50812	-4.22179	-6.1669	-1.90616	-2.3115	-2.26223	-1.85432	-2.54683	-2.42038	-2.74573	-1.64589	-2.90132	-4.77008	-4.80498	-1.93379	-2.44443	-2.65372	-1.90333
Olr305	1	gene	220091536	220092534	+	1	ensembl	protein_coding	-6.75739	-6.75739	-6.75739	-4.56674	-6.75739	-6.75739	-6.75739	-6.75739	-6.75739	-6.75739	-6.84702	-6.84702	-6.84702	-6.84702	-3.76004	-6.84702	-6.84702	-6.84702	-6.84702	-6.84702
Ttc30a1	3	gene	69348272	69350266	-	1	ensembl	protein_coding	2.35389	2.8364	2.60724	1.27282	1.08044	2.70368	2.47579	2.71668	2.36789	2.56511	2.40445	2.49178	2.73859	2.57088	1.26819	1.16842	2.69212	2.59213	2.66174	2.39166
Mir877	20	gene	5416400	5416484	+	1	ensembl	miRNA	-6.81374	-6.81374	-6.81374	-6.81374	-6.81374	-6.81374	-6.81374	-6.81374	-6.81374	-6.81374	-6.81374	-6.81374	-6.81374	-6.81374	-6.81374	-6.81374	-6.81374	-6.81374	-6.81374	-6.81374
Msantd1	14	gene	81783158	81789350	-	4	ensembl	protein_coding	-0.238006	-0.876479	-0.440103	-1.84175	-1.79821	0.517008	0.10258	0.0131005	0.00934477	0.421593	-0.307452	0.366303	-1.02624	-0.115717	-1.63483	-1.84758	0.589169	0.0711282	-0.0989368	-0.126772
Ddr2	13	gene	92942668	92987943	-	5	ensembl	protein_coding	2.23994	2.3511	2.39669	1.31582	1.40852	2.5745	2.60683	2.47465	2.3001	2.71323	2.27484	2.65846	2.16223	2.3819	1.46844	1.62276	2.69428	2.57955	2.39169	2.14722
Hscb	12	gene	53616659	53626996	+	2	ensembl	protein_coding	1.89281	1.86978	2.05601	0.924354	0.445919	2.12478	1.88214	1.88394	2.00357	2.53156	1.85352	2.48034	1.8531	2.04847	1.15102	0.509868	2.15374	1.74253	1.82797	1.99429
Itsn1	11	gene	35547331	35635193	+	7	ensembl	protein_coding	5.38489	5.52936	5.21091	4.09145	4.30081	5.48986	5.68532	5.43281	5.27928	5.36399	5.39638	5.27515	5.48294	5.19463	4.24458	4.36465	5.50815	5.63881	5.36325	5.30014
Nabp2	7	gene	2798471	2804072	-	5	ensembl	protein_coding	5.49293	5.62992	5.57236	4.44108	4.75923	5.49748	5.75346	5.68609	5.60537	6.01267	5.4515	5.93791	5.58427	5.50652	4.54375	4.88642	5.48448	5.66495	5.74164	5.64917
Plscr2	8	gene	99199389	99210702	+	3	ensembl	protein_coding	-1.11009	-0.72188	-1.09836	-1.62095	-4.03758	-1.07972	-2.00235	-0.699016	-1.23087	-1.13742	-1.11937	-1.17045	-0.646035	-1.09217	-1.40143	-2.9605	-1.3332	-2.08125	-1.63353	-1.30032
Cts8	17	gene	5600012	5611782	+	1	ensembl	protein_coding	-6.69791	-6.69791	-6.69791	-6.69791	-6.69791	-6.69791	-6.69791	-4.41653	-6.69791	-6.69791	-4.74766	-6.90441	-6.90441	-6.90441	-6.90441	-6.90441	-6.90441	-6.90441	-4.71477	-6.90441
Tcp1	1	gene	51719002	51726735	+	3	ensembl_havana	protein_coding	6.14186	6.38654	5.92499	4.9817	5.09462	6.14103	6.06882	6.13785	6.03585	6.3431	6.12236	6.28601	6.39858	5.90893	5.14061	5.19047	6.16314	5.9808	6.08814	5.97731
Pcdha9	18	gene	29701815	29924444	+	1	ensembl	protein_coding	2.17686	2.45899	2.37333	1.27737	1.64279	2.45253	2.20758	2.27719	2.35885	2.36096	2.16917	2.03905	2.25106	2.54504	1.20654	2.0639	2.60485	2.21253	2.24148	2.25284
Mir881	X	gene	151278812	151278888	-	1	ensembl	miRNA	-6.81374	-6.81374	-6.81374	-6.81374	-6.81374	-6.81374	-6.81374	-6.81374	-6.81374	-6.81374	-6.81374	-6.81374	-6.81374	-6.81374	-6.81374	-6.81374	-6.81374	-6.81374	-6.81374	-6.81374
Msl3	X	gene	27420566	27438237	+	6	ensembl	protein_coding	3.59554	4.00507	3.63227	2.57061	2.79334	3.65696	3.7119	3.66033	3.63777	3.75154	3.57605	3.68412	4.04097	3.63714	2.67182	2.89706	3.66036	3.65961	3.6011	3.58707
Mir190b	2	gene	208854175	208854252	+	1	ensembl	miRNA	-6.59149	-6.59149	-6.59149	-6.59149	-6.59149	-6.59149	-6.59149	-6.59149	-6.59149	-6.59149	-6.96572	-5.10156	-6.96572	-6.96572	-6.96572	-6.96572	-6.96572	-5.08753	-6.96572	-6.96572
Bend7	17	gene	79104805	79183747	-	5	ensembl	protein_coding	-0.559611	-1.28161	-1.3298	-2.52231	-2.82799	-1.15703	-0.521758	-2.71782	-1.50735	-1.23701	-0.914283	-1.23675	-0.974619	-1.05399	-2.5834	-2.94972	-1.6185	-0.703735	-2.29039	-1.33691
Ldlrap1	5	gene	156742863	156765855	-	6	ensembl	protein_coding	3.87149	4.36351	4.50312	2.7817	3.22735	4.72114	4.49615	4.12519	4.42622	4.49424	3.78722	4.4066	4.35318	4.53097	2.88659	3.30017	4.80246	4.47228	4.04019	4.43044
Zfp180	1	gene	82186002	82205285	+	2	ensembl	protein_coding	5.98734	6.32085	6.16514	4.90924	5.12299	6.56033	6.19516	6.23797	6.14489	6.50646	5.99706	6.46018	6.35332	6.10642	5.06352	5.18998	6.66367	6.1061	6.11956	6.09057
Irf3	1	gene	102056872	102061803	+	2	ensembl	protein_coding	3.3505	3.698	4.25969	2.60729	3.23591	3.9008	3.88138	4.06435	3.90812	4.44011	3.24237	4.37045	3.63688	4.32844	2.72911	3.38706	3.91456	3.81498	4.00155	3.92076
Fabp7	20	gene	42501163	42504695	+	4	ensembl	protein_coding	5.15555	5.86146	5.77876	4.37356	4.74263	6.06547	5.92502	5.53544	5.93443	6.24404	5.07111	6.18657	5.84957	5.78654	4.51363	4.82683	6.10772	5.8743	5.45637	5.94369
Mir135a	7	gene	32974076	32974175	-	1	ensembl	miRNA	-6.81374	-6.81374	-6.81374	-6.81374	-6.81374	-6.81374	-6.81374	-6.81374	-6.81374	-6.81374	-6.81374	-6.81374	-6.81374	-6.81374	-6.81374	-6.81374	-6.81374	-6.81374	-6.81374	-6.81374
App	11	gene	28049096	28265240	-	7	ensembl	protein_coding	10.1693	10.2714	10.321	9.1924	9.1082	10.1649	10.3354	10.3687	10.2454	10.4211	10.1752	10.3451	10.2579	10.3207	9.35154	9.16476	10.1667	10.2602	10.3356	10.2201
Sf3b3	19	gene	54224944	54262543	+	6	ensembl	protein_coding	5.48825	6.0524	5.73779	4.69641	4.79523	5.70238	6.00102	5.89383	5.67681	5.68424	5.44945	5.5439	6.07783	5.75104	4.84843	4.86103	5.69332	5.99403	5.86767	5.64166
RGD1562699	18	gene	59033710	59034582	-	1	ensembl	protein_coding	-6.31854	-6.31854	-4.13246	-3.51739	-4.25075	-3.42211	-6.31854	-6.31854	-4.15654	-2.53701	-4.93224	-2.85589	-7.24995	-3.39961	-3.84349	-4.76321	-4.03141	-4.08734	-7.24995	-4.87735
Trim63	5	gene	156292566	156306092	+	6	ensembl	protein_coding	-2.79617	-2.18922	-2.19153	-4.11807	-3.533	-1.77203	-2.08657	-3.01041	-3.01442	-1.72527	-2.52044	-1.54648	-2.2599	-1.54287	-2.66561	-2.69799	-1.98494	-2.26496	-6.14032	-2.81318
Nudt1	12	gene	18384509	18387638	-	5	ensembl	protein_coding	-0.0535792	0.489987	-0.253971	-1.94203	-0.996219	0.638423	0.120361	0.174215	0.292938	0.765509	0.00548284	0.709887	0.455134	-0.315966	-2.08046	-0.89911	0.794037	0.16582	0.143897	0.256914
Cables1	18	gene	3328555	3432388	+	6	ensembl	protein_coding	4.19963	3.74597	3.29859	2.49017	2.7346	3.69215	3.8384	4.14144	3.29391	3.6153	4.25879	3.48099	3.70729	3.25998	2.66853	2.85073	3.67655	3.77659	4.17784	3.19287
Acad9	2	gene	142407990	142431623	+	4	ensembl	protein_coding	5.13527	5.15653	5.11313	4.083	4.15128	5.04364	5.4353	5.13455	5.01809	5.37555	5.12026	5.30323	5.10915	5.1063	4.2282	4.22612	5.02018	5.45125	5.10542	4.97624
Txlna	5	gene	151561492	151575118	-	1	ensembl	protein_coding	3.99734	4.08854	3.96377	2.89619	3.09105	4.10521	4.13685	4.16355	3.86099	4.00344	3.98823	3.90851	4.07689	3.96908	3.00356	3.16404	4.14795	4.10256	4.12559	3.82052
Olr799	4	gene	133592039	133592983	+	4	ensembl	protein_coding	-6.81374	-6.81374	-6.81374	-6.81374	-6.81374	-6.81374	-6.81374	-6.81374	-6.81374	-6.81374	-6.81374	-6.81374	-6.81374	-6.81374	-6.81374	-6.81374	-6.81374	-6.81374	-6.81374	-6.81374
Mir222	X	gene	4474734	4474836	+	1	ensembl	miRNA	-6.70219	-6.70219	-6.70219	-6.70219	-6.70219	-6.70219	-6.70219	-6.70219	-6.70219	-6.70219	-6.89001	-6.89001	-6.89001	-6.89001	-6.89001	-6.89001	-6.89001	-5.01182	-6.89001	-6.89001
Ap3s1	18	gene	40378507	40443852	+	6	ensembl	protein_coding	4.36508	4.30239	4.18538	3.16858	3.31779	4.20982	4.20345	4.22384	4.3965	4.65834	4.40191	4.61111	4.25888	4.17706	3.32907	3.38989	4.19985	4.14766	4.14478	4.37096
Cryga	9	gene	70740873	70742647	+	3	ensembl	protein_coding	1.11604	1.20845	1.75989	0.652606	0.548907	1.44896	1.57304	1.95715	1.32723	2.09244	1.10205	1.84829	1.04131	1.70818	0.71159	0.612097	1.55462	1.70454	1.98506	1.41697
Mtbp	7	gene	95931981	96009703	+	5	ensembl	protein_coding	-0.756091	-0.111541	-0.640971	-1.82208	-1.66837	-0.437378	-0.0614427	-0.514896	-0.383165	-0.484404	-1.09299	-0.862744	0.208723	-0.557518	-1.17542	-1.64789	-0.435851	-0.139625	-0.771062	-0.405962
Tmem30c	11	gene	48534906	48552064	+	5	ensembl	protein_coding	-6.09794	-6.09794	-6.09794	-6.09794	-3.15602	-3.09902	-6.09794	-6.09794	-3.85944	-6.09794	-7.4481	-3.94185	-5.00154	-4.30626	-7.4481	-3.71704	-3.86741	-5.26039	-7.4481	-4.3613
Camkk1	10	gene	59324561	59347636	+	6	ensembl	protein_coding	8.82834	9.09592	8.86088	7.858	7.98692	8.85735	8.96314	9.11003	9.10865	8.99634	8.81252	8.87815	9.09082	8.85547	7.9845	8.0623	8.84384	8.91079	9.09806	9.12915
Rpap1	3	gene	118019055	118135613	-	5	ensembl	protein_coding	4.33652	4.36881	4.32584	3.10583	3.25506	4.22512	4.59761	4.44051	4.4219	4.57714	4.35602	4.48351	4.33243	4.34441	3.20881	3.29043	4.227	4.58205	4.42006	4.40962
Stim1	1	gene	173562502	173722020	+	4	ensembl	protein_coding	6.26125	6.52631	6.40439	5.28796	5.47449	6.2446	6.69413	6.55171	6.31118	6.37284	6.24236	6.24358	6.50413	6.42477	5.41378	5.55781	6.22098	6.70258	6.53955	6.2793
Cd47	11	gene	56693298	56738925	-	6	ensembl	protein_coding	4.76712	4.77213	4.7575	3.57086	3.51769	4.777	4.73908	4.68474	4.49673	4.68632	4.76175	4.66279	4.71455	4.81615	3.81207	3.50081	4.75414	4.66634	4.65503	4.42553
Pxdn	6	gene	57551669	57661402	+	6	ensembl	protein_coding	4.44311	5.24171	5.42823	3.86067	4.23575	4.69587	4.89679	5.28731	4.76275	4.72485	4.39338	4.52589	5.21526	5.53501	3.91435	4.34932	4.64664	4.8885	5.32694	4.78174
Vps29	12	gene	41570698	41579742	-	6	ensembl	protein_coding	6.23979	6.42509	6.01966	5.02395	5.28835	6.06869	6.20203	6.26548	6.16953	6.54256	6.24182	6.48567	6.44279	5.99811	5.13376	5.39277	6.0399	6.15058	6.2254	6.13434
Gkap1	17	gene	8989135	9028899	+	5	ensembl	protein_coding	2.94882	3.37514	3.10595	1.87037	2.20789	3.65515	3.23154	3.28445	3.11571	3.74191	2.91498	3.71037	3.35549	3.06022	1.99948	2.29219	3.73133	3.15969	3.22979	3.08339
Tbx5	12	gene	43949166	43996736	+	4	ensembl	protein_coding	-3.94218	-3.6744	-6.05444	-6.05444	-3.18369	-3.91542	-3.91068	-2.57895	-2.22147	-3.08938	-2.8421	-3.83666	-3.1127	-4.21374	-7.46479	-3.60403	-2.80431	-4.35116	-3.36368	-3.03188
Psmd13	1	gene	220561620	220574027	+	5	ensembl	protein_coding	6.31129	6.35719	6.23625	5.20889	5.38751	6.10413	6.36736	6.38186	6.33099	6.6851	6.31767	6.62427	6.34212	6.23441	5.33464	5.45916	6.07301	6.32297	6.3482	6.31413
Rnase2	15	gene	31984003	31984812	-	1	ensembl	protein_coding	-6.68655	-6.68655	-6.68655	-6.68655	-6.68655	-6.68655	-6.68655	-6.68655	-4.38783	-6.68655	-6.91185	-6.91185	-4.5445	-6.91185	-6.91185	-6.91185	-6.91185	-6.91185	-6.91185	-4.72755
Lrit1	16	gene	14209199	14218946	+	2	ensembl	protein_coding	-5.64435	-2.4979	-3.46731	-5.64435	-3.58511	-5.64435	-3.5313	-2.70685	-5.64435	-5.64435	-4.2517	-3.89451	-3.55321	-4.12717	-4.57395	-4.05554	-3.23792	-4.8194	-3.4941	-8.00273
Ifi35	10	gene	89156392	89164642	+	5	ensembl	protein_coding	0.933962	1.22908	1.89216	0.618681	0.328209	1.47043	2.1331	1.33088	1.5747	2.10743	0.841738	2.05353	1.21675	1.92098	0.831703	0.386359	1.46269	2.14573	1.24819	1.51095
P4ha2	10	gene	39214791	39243698	+	4	ensembl	protein_coding	3.53621	4.07662	4.04082	2.86001	3.02573	4.13111	4.27705	4.38488	3.7817	4.04534	3.47007	3.94193	4.0433	4.06202	2.98274	3.1125	4.15419	4.2729	4.41853	3.70128
Tmem134	1	gene	226244711	226250208	+	5	ensembl	protein_coding	3.75758	3.65805	3.97557	2.3778	2.64624	4.02842	4.04149	3.93379	4.02228	4.22968	3.6814	4.10609	3.566	4.01935	2.58982	2.73877	4.03291	4.00437	3.94038	3.99182
Olr758	3	gene	109254928	109255866	+	3	ensembl	protein_coding	-6.58734	-6.58734	-6.58734	-6.58734	-6.58734	-6.58734	-6.58734	-6.58734	-6.58734	-6.58734	-5.07538	-6.96856	-6.96856	-6.96856	-6.96856	-6.96856	-5.04947	-6.96856	-6.96856	-6.96856
Pdxk	20	gene	13102325	13124153	+	1	ensembl	protein_coding	3.98409	4.12457	4.1315	2.99027	2.87227	3.9224	4.60162	4.33839	4.04322	3.94727	3.96988	3.83698	4.12188	4.02674	3.1415	2.92713	4.00475	4.52816	4.31306	4.08555
LOC292543	1	gene	63610443	63624068	+	5	ensembl	protein_coding	-0.22869	-0.197833	0.399871	-0.54643	-0.711225	0.0110206	0.195928	0.252163	-0.135844	-0.042975	0.150264	-0.581333	0.113209	0.356295	-0.703099	-0.739702	0.268768	-0.0496616	0.349807	-0.168564
Nme2	10	gene	81478178	81483679	-	3	ensembl	protein_coding	7.39523	7.45259	7.41819	6.44686	6.48035	7.36127	7.58835	7.6162	7.52449	7.85162	7.38219	7.81532	7.41726	7.4214	6.58287	6.5507	7.3327	7.55147	7.57954	7.5017
Tubb5	20	gene	5519551	5523476	+	5	ensembl	protein_coding	9.28675	9.14893	9.20462	8.13789	8.07498	9.06838	9.31401	9.35935	9.33734	9.49328	9.30622	9.41766	9.0983	9.21664	8.27683	8.12411	9.0409	9.26782	9.33653	9.34052
Pik3ca	2	gene	138491967	138521470	+	6	ensembl	protein_coding	4.70217	4.94687	4.74589	3.74154	3.94249	4.87626	4.87499	4.80809	4.80438	5.09537	4.70992	4.96513	4.88547	4.8093	3.82415	4.03684	4.90919	4.89159	4.76031	4.74615
Defb5	16	gene	75190228	75200181	-	3	ensembl	protein_coding	-6.81374	-6.81374	-6.81374	-6.81374	-6.81374	-6.81374	-6.81374	-6.81374	-6.81374	-6.81374	-6.81374	-6.81374	-6.81374	-6.81374	-6.81374	-6.81374	-6.81374	-6.81374	-6.81374	-6.81374
Myl6l	12	gene	35081272	35081883	-	3	ensembl	protein_coding	6.28582	6.46193	6.30406	5.36499	5.57578	6.17619	6.46286	6.55759	6.41468	6.88866	6.28507	6.81184	6.49779	6.3469	5.47376	5.62892	6.08725	6.4183	6.48099	6.46173
Rbl1	3	gene	158398177	158452482	+	5	ensembl	protein_coding	-2.15892	-1.64557	-1.04319	-2.74086	-2.41791	-0.776679	-1.12184	-1.54729	-1.29041	-1.30311	-2.08939	-1.6196	-1.59242	-0.67071	-3.04619	-1.52273	-0.946536	-1.46022	-1.85455	-1.24342
Iqcf1	8	gene	114557460	114559884	+	2	ensembl	protein_coding	-4.18473	-6.35844	-3.26735	-6.35844	-6.35844	-6.35844	-6.35844	-6.35844	-4.11055	-6.35844	-5.00342	-5.03704	-7.19657	-3.17501	-7.19657	-7.19657	-4.9734	-7.19657	-4.96998	-4.12658
Rasgrp3	6	gene	30966364	31029468	-	4	ensembl	protein_coding	3.58093	3.82752	3.94166	2.80687	2.84053	3.94343	3.7933	3.73575	4.06048	4.20123	3.6305	4.20345	3.72104	3.90519	2.99263	2.78863	4.08091	3.66455	3.62055	4.12425
Eno2	4	gene	224302789	224311633	-	5	ensembl	protein_coding	9.71802	9.45237	9.36534	8.44757	8.36887	9.1164	9.44886	9.5916	9.46418	9.62326	9.76404	9.59178	9.43915	9.31954	8.60227	8.42652	9.08	9.37382	9.53309	9.46625
Olr137	1	gene	175305613	175306578	+	1	ensembl	protein_coding	-6.2977	-6.2977	-6.2977	-6.2977	-6.2977	-6.2977	-6.2977	-6.2977	-6.2977	-6.2977	-7.16664	-5.30248	-4.33711	-7.16664	-5.10898	-7.16664	-7.16664	-7.16664	-7.16664	-5.22862
Aktip	19	gene	28354290	28364162	+	5	ensembl	protein_coding	5.94936	6.26145	6.00699	5.01086	5.03661	6.01517	6.13194	6.17928	6.04813	6.33266	5.93408	6.25364	6.27279	5.98594	5.12686	5.09511	6.01958	6.09921	6.15122	6.03401
Pcbp4	8	gene	114519757	114529993	+	6	ensembl	protein_coding	7.15735	7.05912	7.2287	6.03929	6.18317	7.14198	7.47143	7.35374	7.34046	7.58487	7.14412	7.52691	6.99047	7.23709	6.14579	6.26881	7.11511	7.44983	7.34038	7.34162
Amelx	X	gene	26843989	26855286	+	7	ensembl	protein_coding	-5.90175	-3.2721	-5.90175	-5.90175	-5.90175	-5.90175	-5.90175	-5.90175	-5.90175	-5.90175	-5.49985	-4.30404	-4.49745	-3.8102	-7.52656	-7.52656	-5.47211	-5.51589	-4.70859	-7.52656
Prpf19	1	gene	234012654	234023693	+	6	ensembl	protein_coding	7.99006	8.01628	7.98747	6.84423	6.87935	7.8817	8.08521	8.09291	8.05293	8.3093	7.99683	8.24187	7.9945	7.99536	6.96054	6.94622	7.86147	8.0407	8.06365	8.03831
Metap2	7	gene	34821204	34853497	-	6	ensembl	protein_coding	4.99523	5.24908	5.03579	4.06044	4.08969	5.22191	5.10077	5.21036	5.1218	5.32359	4.9646	5.23137	5.29889	5.04022	4.25254	4.1101	5.22994	5.06672	5.15335	5.06091
Arhgef7	16	gene	82479279	82557593	-	7	ensembl	protein_coding	4.94596	5.10894	5.065	3.77269	3.9939	4.95106	5.37829	5.20051	4.82883	4.99284	4.8072	4.93675	5.02315	5.05169	3.89857	4.12795	5.06357	5.35554	5.16762	4.80598
Ndrg2	15	gene	32118800	32127444	-	5	ensembl	protein_coding	8.93209	9.06703	9.09011	7.85407	7.90263	9.03591	9.49495	9.1011	9.04478	9.44508	8.9139	9.38369	9.04395	9.08503	7.9935	7.95864	9.04327	9.49122	9.06548	8.98909
Cdk18	13	gene	53964633	53972998	-	5	ensembl	protein_coding	3.22585	3.70748	3.64594	2.1612	2.72468	3.62701	3.67679	3.6438	3.9136	3.95893	3.14407	3.88508	3.68816	3.65675	2.26618	2.84697	3.67247	3.63082	3.5767	3.91809
LOC688390	20	gene	49571819	49573769	+	3	ensembl	protein_coding	-0.497466	-0.315335	-0.670568	-1.03184	-1.70532	-0.60168	-0.222054	-0.868836	-0.783302	0.015253	-0.481306	-0.0129259	-0.0977845	-0.822135	-0.904421	-1.59951	-0.58353	-0.374515	-1.00807	-0.796959
Midn	7	gene	12585958	12592656	-	6	ensembl	protein_coding	4.67316	4.56094	4.87071	3.46987	3.746	4.76754	5.19602	4.92252	4.88474	5.2023	4.64245	5.15026	4.52112	4.88163	3.54216	3.83386	4.75478	5.19456	4.90602	4.86696
Olr1400	10	gene	34406243	34407172	+	1	ensembl	protein_coding	-6.46415	-6.46415	-6.46415	-6.46415	-6.46415	-6.46415	-6.46415	-6.46415	-6.46415	-6.46415	-7.05281	-5.18865	-4.95238	-7.05281	-7.05281	-7.05281	-7.05281	-7.05281	-5.13076	-7.05281
Ceacam3	1	gene	80368034	80380736	+	4	ensembl	protein_coding	-4.54126	-6.6611	-3.14865	-4.60086	-6.6611	-4.5144	-4.50964	-6.6611	-4.46891	-3.18889	-3.21249	-4.62709	-3.46965	-3.62814	-4.3951	-4.42675	-6.86214	-4.61026	-6.86214	-6.86214
Ago4	5	gene	148272608	148328239	-	5	ensembl	protein_coding	1.63991	2.06511	1.62477	0.481652	0.452113	2.01547	2.37794	1.90706	1.52415	1.54761	1.62275	1.54607	1.96123	1.60301	0.561155	0.555508	2.10395	2.35297	1.87844	1.45072
Rpf1	2	gene	270895282	270909803	-	6	ensembl	protein_coding	2.0428	2.43403	1.82367	0.721229	1.18613	2.44156	2.10211	2.12334	2.06519	2.16933	1.97787	2.03283	2.45289	1.76397	0.770809	1.4072	2.50011	2.06765	2.1132	2.02284
Asic2	10	gene	67916010	68180348	-	5	ensembl	protein_coding	5.33207	4.8894	4.96564	3.8913	4.09223	4.87048	5.18745	5.47766	5.26214	5.50183	5.3762	5.42274	4.91451	4.93448	4.05779	4.17923	4.81471	5.09791	5.41912	5.25351
Cldn7	10	gene	56321561	56323745	+	6	ensembl	protein_coding	-4.26571	-3.13261	-6.48202	-6.48202	-6.48202	-6.48202	-6.48202	-6.48202	-6.48202	-6.48202	-4.93384	-7.07503	-2.99115	-7.07503	-7.07503	-4.77768	-4.10162	-7.07503	-7.07503	-7.07503
Zmynd11	17	gene	65590225	65642353	-	6	ensembl	protein_coding	5.51906	5.82082	5.72199	4.37416	4.70734	5.73393	5.84323	5.77959	5.71489	5.83626	5.44909	5.80119	5.73897	5.71431	4.56366	4.85172	5.74204	5.77398	5.76692	5.6494
Hmx3	1	gene	210520996	210522960	+	4	ensembl	protein_coding	-4.81265	-4.81265	-2.65995	-2.8118	-4.81265	-4.81265	-4.81265	-4.81265	-4.81265	-4.81265	-4.47222	-4.25145	-6.38484	-4.07514	-4.96282	-3.77249	-4.43319	-4.49486	-3.74055	-3.38537
Kank3	7	gene	18846292	18859539	+	6	ensembl	protein_coding	2.69386	2.68634	2.45869	1.60594	1.55704	2.51926	2.84311	2.93869	2.42068	2.96998	2.68105	2.9113	2.60188	2.44367	1.70405	1.69748	2.45318	2.83048	2.96474	2.40576
Tas2r113	4	gene	229616822	229617751	-	1	ensembl	protein_coding	-6.76779	-6.76779	-6.76779	-6.76779	-6.76779	-4.51807	-6.76779	-6.76779	-6.76779	-6.76779	-6.83933	-6.83933	-6.83933	-6.83933	-6.83933	-6.83933	-3.87423	-6.83933	-6.83933	-6.83933
Casr	11	gene	70279170	70348597	+	6	ensembl	protein_coding	-0.436201	-0.256033	-0.607437	-4.10631	-2.49161	0.317241	0.46283	0.0872961	-1.88042	-0.0245774	-0.250822	-0.0861299	-0.464189	-0.910393	-3.85517	-2.07879	0.313101	0.364253	0.0547277	-2.0218
Zc2hc1b	1	gene	8933728	8951722	-	2	ensembl	protein_coding	-6.87267	-6.87267	-4.7017	-6.87267	-6.87267	-4.77018	-6.87267	-4.72257	-6.87267	-6.87267	-6.71535	-6.71535	-6.71535	-4.26382	-6.71535	-6.71535	-6.71535	-6.71535	-6.71535	-4.31648
Aox1	9	gene	64726637	64804786	+	6	ensembl	protein_coding	2.96465	3.54185	4.02414	2.16393	2.02883	4.60679	4.39027	3.58157	3.93975	4.29547	2.87072	4.21967	3.45453	4.05618	2.27939	2.09368	4.70129	4.39806	3.53032	3.93341
Dmrta1	5	gene	112243272	112249812	+	4	ensembl	protein_coding	-2.14452	-2.36906	-2.58656	-5.09433	-3.29785	-2.67647	-1.69646	-2.61386	-2.40281	-1.78011	-1.48024	-1.23063	-1.57836	-2.60781	-3.80204	-6.06177	-2.32881	-3.22474	-2.32497	-2.02265
C1ql4	X	gene	115272678	115275588	-	5	ensembl	protein_coding	-4.59544	-4.59544	-4.59544	-4.59544	-4.59544	-4.59544	-2.5566	-4.59544	-2.518	-4.59544	-3.82538	-3.70916	-3.88686	-3.3733	-5.23877	-5.2783	-5.02123	-3.40278	-4.16678	-3.93557
Phf5a	7	gene	123070683	123077281	-	4	ensembl	protein_coding	3.74411	3.96318	3.84646	2.90782	3.13899	4.13119	4.25445	4.0881	4.14133	4.37663	3.71076	4.31126	3.84348	3.84382	3.02587	3.25072	4.13144	4.26913	4.10872	4.09705
Crnkl1	3	gene	146546958	146561840	-	7	ensembl_havana	protein_coding	2.45292	2.97836	2.6773	1.07819	1.6539	2.92927	2.85184	2.64039	2.69393	2.91619	2.62578	2.80466	2.91838	2.69498	1.21462	1.81176	2.95853	2.78011	2.41438	2.64907
Ndufaf3	8	gene	116696132	116698175	-	5	ensembl	protein_coding	4.374	4.55085	4.516	3.6004	3.82978	4.49411	4.79701	4.8355	4.64634	4.90499	4.43037	4.83643	4.45444	4.539	3.77771	3.87783	4.44039	4.76087	4.82093	4.61103
Prkch	6	gene	105972486	106109232	+	6	ensembl	protein_coding	1.73106	2.17972	1.65695	0.644723	0.276122	2.23648	2.29593	1.66836	1.78444	2.10127	1.80313	2.20974	2.04973	1.51789	0.620279	0.66867	1.9667	2.10569	1.70667	1.92657
RGD1306227	2	gene	70696812	70718962	+	5	ensembl	protein_coding	-0.241013	0.277113	-0.179969	-1.20546	-1.39431	0.38747	0.426981	0.0495077	-0.326777	0.122607	-0.172527	-0.00929304	0.256401	-0.152383	-1.14092	-1.31133	0.425841	0.437102	-0.0720347	-0.344696
Klc4	9	gene	15554537	15568069	+	6	ensembl	protein_coding	4.23818	4.22241	4.56352	3.06912	3.35078	4.42556	4.78956	4.54206	4.5524	4.72931	4.19973	4.63445	4.1695	4.57032	3.19232	3.40913	4.45367	4.78056	4.53533	4.53789
Tomm40l	13	gene	94218782	94221471	-	2	ensembl	protein_coding	3.96742	4.17695	3.85253	2.69353	3.06054	3.81633	4.17925	3.97755	3.75573	4.07067	3.98122	3.95923	4.20453	3.89015	2.83607	3.09254	3.79207	4.14675	3.96328	3.68465
Zfp57	20	gene	4054824	4061113	-	5	ensembl	protein_coding	3.08487	3.44142	3.12577	2.10323	2.37127	3.35352	3.42376	3.34444	3.0852	3.0893	3.06942	2.99254	3.49272	3.07606	2.14703	2.50404	3.35475	3.40782	3.31787	3.06053
Samd5	1	gene	5388579	5437905	-	4	ensembl	protein_coding	2.91783	2.37566	2.92805	1.28242	1.40498	3.08432	2.88135	2.52071	2.83041	2.92469	2.88149	2.82933	2.27641	3.03663	1.31955	1.46348	3.12849	2.92791	2.50061	2.78651
Olr544	3	gene	81518429	81519367	-	3	ensembl	protein_coding	-6.69571	-6.69571	-4.39014	-6.69571	-6.69571	-6.69571	-6.69571	-6.69571	-6.69571	-6.69571	-4.75157	-6.90598	-6.90598	-4.65213	-6.90598	-6.90598	-6.90598	-6.90598	-6.90598	-6.90598
Frem1	5	gene	105042311	105160290	-	5	ensembl	protein_coding	-0.2674	-1.55492	1.00376	-0.566502	-0.702502	0.275174	0.455394	0.0735369	-2.38472	-0.34317	-0.186457	-0.32819	-1.99702	0.761655	-0.806938	-0.560251	0.0284835	0.356235	0.073642	-1.35251
Mlxipl	12	gene	26588220	26620779	-	2	ensembl_havana	processed_transcript	3.1272	2.92749	3.31249	1.45042	1.60534	2.84284	3.1014	2.95702	3.43147	3.13333	3.18087	3.05888	2.8176	3.44242	1.43049	1.66984	2.83661	3.11671	2.90662	3.42895
Tctn1	12	gene	41671666	41704377	+	5	ensembl	protein_coding	4.02379	4.22875	4.16991	3.09249	3.14861	4.309	4.46892	4.32796	4.29106	4.36576	4.05769	4.35444	4.12853	4.21352	3.2161	3.16342	4.3613	4.43266	4.22359	4.27498
Dnaaf3	1	gene	75669674	75677024	-	3	ensembl	protein_coding	0.767772	1.30357	1.07811	-0.313488	-0.061334	2.00647	1.08653	1.45564	0.955634	1.38862	0.78531	1.24191	1.19361	1.09141	-0.0398162	-0.141914	2.11506	1.08254	1.39664	0.942783
Aimp2	12	gene	14782144	14791697	+	5	ensembl	protein_coding	5.00743	4.95789	4.97706	3.94138	4.13131	4.82568	5.16202	5.24067	5.03165	5.42917	5.01442	5.36865	4.86228	5.01406	4.07765	4.17207	4.75654	5.18039	5.24025	5.01797
Olr92	1	gene	174628152	174629096	-	2	ensembl	protein_coding	-6.76704	-4.2764	-6.76704	-6.76704	-6.76704	-6.76704	-6.76704	-6.76704	-6.76704	-6.76704	-6.83901	-6.83901	-3.62866	-6.83901	-6.83901	-6.83901	-6.83901	-6.83901	-6.83901	-6.83901
Homer1	2	gene	42107429	42208021	+	2	ensembl	protein_coding	4.53578	4.54969	4.20294	3.05135	3.51876	4.58313	4.48501	4.34821	4.47867	4.62881	4.54453	4.53269	4.53547	4.16494	3.15345	3.63425	4.6151	4.43541	4.29459	4.4719
Foxm1	4	gene	226891344	226902363	+	6	ensembl	protein_coding	2.28054	2.09984	1.98734	0.730409	0.802576	2.1704	2.21574	1.99843	2.01849	2.25202	2.30869	2.15458	2.09503	1.99357	0.821974	0.904113	2.15153	2.17728	1.98181	1.96722
LOC679149	19	gene	31	5898	-	1	ensembl	protein_coding	-1.43065	-2.23611	-2.20249	-2.61528	-3.68263	-2.2843	-1.62735	-2.22733	-1.71415	-0.570127	-1.56745	-0.430615	-2.43754	-2.02755	-2.17819	-3.50385	-2.11936	-1.95747	-2.6965	-1.67188
Dkk2	2	gene	255689579	255781478	+	5	ensembl	protein_coding	-2.98786	-3.96041	-2.88054	-4.27589	-4.24089	-2.95796	-1.9137	-3.38168	-4.14911	-3.39627	-3.43696	-3.0663	-3.71123	-2.89032	-3.77136	-4.73201	-2.98286	-2.21848	-3.3941	-3.94069
Cited1	X	gene	72970879	72975577	-	6	ensembl_havana	protein_coding	-0.401116	-0.609631	-0.109443	-1.72155	-0.956827	-0.498954	-0.563638	0.112612	-0.667853	0.517817	-0.443369	0.372975	-0.493228	-0.0703384	-1.75345	-0.771438	-0.610962	-0.53268	0.226847	-0.822946
Trim32	5	gene	85530389	85541240	+	5	ensembl_havana	protein_coding	6.04681	6.18867	6.00604	4.94038	5.05225	6.10544	6.25533	6.20332	6.07966	6.20572	6.04408	6.09279	6.17369	6.00854	5.06332	5.11815	6.11567	6.23382	6.17054	6.06302
Olr404	3	gene	21406729	21407667	+	1	ensembl	protein_coding	-6.66032	-6.66032	-6.66032	-6.66032	-6.66032	-6.66032	-6.66032	-6.66032	-6.66032	-6.66032	-6.91865	-6.91865	-6.91865	-6.91865	-6.91865	-6.91865	-6.91865	-4.33532	-6.91865	-6.91865
Alb	14	gene	19083063	19098563	-	4	ensembl	protein_coding	1.78213	2.17327	1.58422	0.682485	0.933305	1.54826	1.44023	1.79439	1.53893	2.0556	1.75602	1.97634	2.24474	1.57281	0.831863	1.08922	1.51199	1.33108	1.77154	1.4472
Cxcl9	14	gene	17145006	17150876	+	5	ensembl	protein_coding	-4.03163	-6.226	-6.226	-6.226	-6.226	-6.226	-3.9989	-6.226	-6.226	-2.63171	-4.32793	-3.85848	-4.06529	-3.33043	-7.30421	-7.30421	-7.30421	-5.15426	-4.29105	-7.30421
Mir325	X	gene	77141009	77141106	-	1	ensembl	miRNA	-6.54042	-6.54042	-6.54042	-4.29142	-6.54042	-6.54042	-6.54042	-6.54042	-6.54042	-6.54042	-4.97731	-7.02083	-7.02083	-7.02083	-4.79978	-7.02083	-7.02083	-4.23237	-7.02083	-7.02083
Ppp2r2a	15	gene	47862028	47921334	+	6	ensembl	protein_coding	6.03623	6.27338	6.00873	5.01499	5.13078	5.99683	6.05351	6.17427	6.08518	6.3755	6.03985	6.30899	6.26878	6.00318	5.14243	5.20692	5.98206	5.98809	6.14148	6.06763
Tmem41a	11	gene	85817837	85824489	+	1	ensembl	protein_coding	4.17515	4.21626	4.08228	3.14474	3.04884	4.11124	4.33461	4.36024	4.11757	4.48785	4.19851	4.41096	4.17354	4.09045	3.27115	3.09797	4.0999	4.29525	4.34792	4.09311
Esf1	3	gene	139635099	139688205	-	6	ensembl	protein_coding	3.61306	3.71281	3.60867	2.34444	2.97133	3.99663	3.75605	3.77516	3.80196	4.1351	3.58881	4.04908	3.67038	3.60376	2.39283	3.08482	4.0653	3.69066	3.75667	3.8129
Twist1	6	gene	63023391	63025505	+	5	ensembl	protein_coding	1.16806	1.62302	1.30477	0.0924743	1.33085	1.04793	1.32421	1.485	1.86747	1.39753	1.09812	1.20417	1.61714	1.30416	0.270185	1.54994	1.02037	1.2474	1.45476	1.87507
LOC685171	4	gene	43314662	43315880	+	2	ensembl	protein_coding	-3.1477	-3.1477	-3.1477	-3.1477	-3.1477	-3.1477	-3.1477	-3.1477	-3.1477	-3.1477	-2.98082	-3.29302	-2.883	-3.0018	-3.45263	-3.72157	-3.22389	-2.81697	-3.10234	-3.00094
Dscam	11	gene	40530632	40775978	-	5	ensembl	protein_coding	4.28359	4.48112	4.29934	3.24613	3.47509	4.28495	4.62232	4.48887	4.2417	4.36855	4.27623	4.24243	4.49905	4.2851	3.37226	3.59747	4.27076	4.64119	4.4582	4.14897
Aldh3b1	1	gene	226018064	226038888	-	6	ensembl	protein_coding	5.46225	5.70592	5.65762	4.65418	4.89039	5.52483	5.73108	5.93291	5.76245	6.00445	5.42992	5.93208	5.62588	5.72211	4.75343	5.01325	5.42595	5.66075	5.97049	5.79221
Erich6	2	gene	168229962	168256064	-	4	ensembl	protein_coding	-0.00194288	0.0731592	-0.759788	-1.4868	-0.907408	-0.33682	-0.057948	0.136953	-0.280669	0.163878	0.0767229	0.243021	0.0824202	-0.886085	-1.6723	-0.327093	-0.63718	-0.139095	0.0742004	-0.272003
Nr5a2	13	gene	58794163	58910799	-	5	ensembl	protein_coding	-6.38341	-3.98791	-4.16038	-6.38341	-6.38341	-2.94158	-6.38341	-6.38341	-4.18487	-4.19546	-7.17205	-4.94631	-3.7937	-4.80733	-7.17205	-3.88459	-3.50168	-4.92955	-7.17205	-4.00795
Olr1395	10	gene	34465828	34466757	+	1	ensembl	protein_coding	-4.26812	-6.45946	-6.45946	-6.45946	-6.45946	-4.24035	-6.45946	-6.45946	-6.45946	-6.45946	-4.94271	-7.11353	-7.11353	-7.11353	-7.11353	-7.11353	-4.913	-4.95989	-4.90961	-4.8913
Rgs17	1	gene	43822671	43918302	-	6	ensembl	protein_coding	2.88384	3.14136	2.71361	1.6548	2.16036	2.89831	2.5586	3.18443	2.92856	2.67919	2.89846	2.56613	3.13316	2.64108	1.74514	2.31774	2.94004	2.50403	3.15002	2.90726
Usp43	10	gene	54152906	54213665	-	6	ensembl	protein_coding	0.691822	1.3245	1.16986	-0.825036	0.0156145	1.04088	1.1482	1.3914	0.898196	0.974032	0.438255	1.58809	0.65401	0.659676	-0.519779	0.224864	0.650617	1.90683	0.950289	1.27662
Pcbp3	20	gene	14590227	14789565	+	5	ensembl	protein_coding	5.72928	5.7592	5.75427	4.6361	4.68048	5.41899	5.86168	5.82652	5.81947	5.91634	5.72544	5.82558	5.7254	5.7881	4.7676	4.76761	5.35855	5.82282	5.80675	5.81447
Apoa4	8	gene	49163147	49165176	+	1	ensembl	protein_coding	-2.93608	-2.67057	-2.05219	-5.03042	-5.03042	-5.03042	-1.63438	-2.86152	-2.8646	-2.87504	-3.18346	-4.923	-3.61387	-2.11786	-3.26219	-6.11818	-2.6563	-2.12641	-2.55132	-2.43307
Avpr2	1	gene	152637478	152639106	-	2	ensembl	protein_coding	-1.50676	-1.51371	-1.27322	-5.88697	-1.83142	-2.17225	-1.953	-1.0776	-1.72596	-1.92	-1.3095	-2.40675	-1.77473	-1.29208	-4.12012	-2.11771	-2.56845	-1.95971	-1.25837	-2.05347
Zbtb37	13	gene	83731239	83747243	-	4	ensembl_havana	protein_coding	-1.74904	-0.786385	-1.80616	-1.53054	-1.04216	-1.29864	-0.374129	-1.5032	-1.36859	-1.25595	-1.91912	-1.38674	-0.819692	-1.79151	-1.36301	-0.820662	-1.08453	-0.432229	-1.56041	-1.53691
Olr262	1	gene	179604375	179605331	-	2	ensembl	protein_coding	-5.55548	-5.55548	-5.55548	-5.55548	-5.55548	-5.55548	-5.55548	-5.55548	-5.55548	-5.55548	-5.78104	-5.10662	-4.06336	-5.69366	-5.61657	-7.67423	-5.04521	-5.79603	-5.04192	-5.7362
Gfod2	19	gene	48549438	48591884	-	4	ensembl	protein_coding	3.2485	3.51868	3.18369	2.39502	2.30411	3.58865	3.48234	3.53496	3.3023	3.71309	3.23735	3.6298	3.50495	3.17564	2.51309	2.3662	3.62642	3.43435	3.49578	3.28775
Olr1512	10	gene	60818115	60819062	-	1	ensembl	protein_coding	-6.36002	-6.36002	-3.97803	-6.36002	-6.36002	-6.36002	-6.36002	-6.36002	-6.36002	-6.36002	-5.10431	-5.13614	-4.87699	-7.18083	-7.18083	-7.18083	-5.07588	-5.12074	-7.18083	-7.18083
Smurf2	10	gene	94763750	94819535	-	6	ensembl	protein_coding	4.27594	4.65913	4.48988	3.30431	3.55406	4.64879	4.70401	4.51802	4.28574	4.60799	4.23972	4.49856	4.64023	4.53018	3.4148	3.68252	4.66314	4.67846	4.47552	4.22473
Clec2l	4	gene	66216161	66232497	+	4	ensembl	protein_coding	5.26206	5.33254	5.51809	4.5186	4.85157	5.435	5.66907	5.83341	5.57823	5.95293	5.23531	5.86393	5.26442	5.51152	4.67207	4.94538	5.4304	5.65653	5.83679	5.53516
Gpr33	6	gene	82366716	82367721	-	2	ensembl	protein_coding	-6.6942	-4.22346	-6.6942	-6.6942	-6.6942	-6.6942	-6.6942	-6.6942	-6.6942	-6.6942	-6.90799	-6.90799	-4.50148	-6.90799	-6.90799	-6.90799	-6.90799	-6.90799	-4.70585	-6.90799
Nnat	3	gene	161553362	161555777	-	5	ensembl	protein_coding	8.41722	7.884	7.66757	6.68838	6.41395	7.1914	7.63286	7.74176	7.79767	8.13561	8.51561	8.0064	7.86664	7.66724	6.91202	6.47091	7.0768	7.56878	7.69605	7.78997
Aldoa	1	gene	205208255	205212211	-	3	ensembl	protein_coding	10.357	10.1588	10.1557	9.1927	9.11038	9.94073	10.2735	10.4013	10.3177	10.5573	10.3794	10.4912	10.1282	10.1342	9.35124	9.18773	9.88554	10.226	10.379	10.3025
Corin	14	gene	38058862	38284566	+	5	ensembl	protein_coding	-2.10736	-5.84851	-2.35502	-5.84851	-5.84851	-2.92748	-3.70866	-3.66505	-2.38294	-3.67866	-2.84141	-2.52776	-3.01761	-3.18788	-7.69402	-5.23913	-4.51671	-3.08075	-3.27212	-2.9933
Rpl39	15	gene	27592993	27593148	-	1	ensembl	protein_coding	4.23731	4.73255	4.25105	3.16731	3.34404	4.53038	4.47009	4.41903	4.23096	4.74264	4.34243	4.67039	4.59506	4.30286	3.21785	3.22316	4.47909	4.58238	4.40298	4.30916
Med19	3	gene	78601276	78611797	+	4	ensembl	protein_coding	3.86902	3.80422	3.61712	2.43208	2.72788	3.84752	3.71745	3.79063	3.61492	4.0728	3.915	4.01048	3.79795	3.62977	2.50587	2.81186	3.86731	3.6915	3.7014	3.5625
LOC689766	13	gene	100330261	100350556	+	2	ensembl	protein_coding	-6.78845	-6.78845	-6.78845	-6.78845	-6.78845	-4.65165	-6.78845	-6.78845	-6.78845	-4.61688	-6.8143	-4.564	-6.8143	-6.8143	-6.8143	-6.8143	-4.49769	-6.8143	-6.8143	-6.8143
Mir217	14	gene	112809662	112809766	+	1	ensembl	miRNA	-6.69311	-6.69311	-6.69311	-6.69311	-6.69311	-6.69311	-6.69311	-6.69311	-6.69311	-6.69311	-6.89623	-6.89623	-6.89623	-6.89623	-6.89623	-4.86497	-6.89623	-6.89623	-6.89623	-6.89623
Cdnf	17	gene	80366184	80379144	-	3	ensembl	protein_coding	-0.955634	-1.54845	-3.34347	-1.94374	-2.09956	-0.446103	-1.2367	-1.77881	-1.0712	-1.79536	-0.930088	-1.72471	-1.38315	-3.75091	-1.94621	-1.9836	-0.590259	-1.13037	-1.63967	-1.14005
Sri	4	gene	22938728	22952058	-	1	ensembl	protein_coding	5.21016	5.81023	5.69514	4.43965	4.63898	5.61069	5.64145	5.68006	5.56488	5.73069	5.14852	5.60378	5.83182	5.70573	4.60178	4.71854	5.63336	5.58567	5.68484	5.50788
Ly86	17	gene	30007745	30080876	-	5	ensembl	protein_coding	0.946468	0.813348	0.4015	-0.809949	-0.938444	1.02393	1.07282	0.843632	0.213095	1.17169	0.996665	1.09643	0.839541	0.391602	-0.70149	-0.93931	1.08711	1.0716	0.793443	0.102501
Usmg5	1	gene	274290376	274297223	-	4	ensembl	protein_coding	4.84623	5.14681	4.45736	3.66205	3.55472	4.74744	4.58247	4.84629	4.51199	5.11254	4.81643	5.14308	5.09862	4.41162	3.66886	3.71023	4.64152	4.5775	4.8826	4.51746
Rnase10	15	gene	31765980	31766618	+	5	ensembl	protein_coding	-4.18422	-6.25124	-2.82631	-4.24233	-4.20681	-6.25124	-4.15339	-4.11063	-3.33825	-6.25124	-3.55029	-4.14428	-4.72675	-3.01731	-4.78008	-4.81299	-7.34552	-5.00382	-4.94914	-3.48546
Hsd17b6	7	gene	2390324	2409187	-	5	ensembl	protein_coding	-5.63259	-5.63259	-3.42655	-5.63259	-5.63259	-2.21707	-5.63259	-5.63259	-5.63259	-5.63259	-4.86133	-5.74989	-4.03801	-3.80916	-4.64106	-4.6762	-3.58726	-8.00071	-5.68	-5.66072
RGD735065	20	gene	9109905	9143582	+	5	ensembl	protein_coding	5.26114	5.45902	5.11925	4.14123	4.22415	5.25719	5.44389	5.32857	5.3118	5.59223	5.27194	5.50793	5.45834	5.10005	4.25969	4.28572	5.25455	5.40702	5.29863	5.29457
Bcap31	1	gene	152845255	152875711	+	3	ensembl	protein_coding	5.83505	5.9169	5.74554	4.59229	4.56526	5.74577	5.81466	5.72723	5.80805	5.98253	5.86369	5.8921	5.91908	5.75437	4.71219	4.62598	5.74255	5.7667	5.66314	5.79346
Naa11	14	gene	13771578	13781613	+	5	ensembl	protein_coding	-0.189473	-0.246157	0.0898547	-1.36451	-0.987261	-0.335122	0.396909	0.0634175	-0.0990679	0.046386	-0.359164	-0.0323006	-0.309945	0.0787817	-1.39867	-1.03013	-0.483371	0.525911	0.463269	-0.0794113
Scx	7	gene	117506706	117508724	+	4	ensembl	protein_coding	-0.668895	-0.755804	0.195366	-1.58288	-0.698116	-0.118436	-0.629221	-0.186407	-0.878276	-0.20349	-0.640382	-0.355808	-0.853736	0.270647	-1.88404	-0.379815	-0.180374	-0.43604	-0.222452	-0.844158
Runx1t1	5	gene	32018815	32131170	+	6	ensembl	protein_coding	3.84639	3.46753	3.59774	2.41298	2.68038	3.87389	3.86809	3.52901	3.78571	3.9082	3.96864	3.83965	3.42526	3.60784	2.40172	2.75464	3.97436	3.89	3.33711	3.7707
Ip6k1	8	gene	116136333	116180472	+	5	ensembl	protein_coding	6.64773	6.57394	6.39327	5.31174	5.31572	6.55176	6.77124	6.52122	6.48374	6.41283	6.63137	6.44181	6.60078	6.31422	5.43289	5.44616	6.51515	6.669	6.50702	6.42477
Hnrnpk	2	gene	41370470	41372254	+	6	ensembl	protein_coding	4.97999	5.34783	4.98966	4.06852	4.15952	5.14518	5.08021	5.18446	5.04916	5.29335	4.89763	5.2287	5.26752	5.15467	4.24796	4.2065	5.02789	5.23962	5.23386	4.79354
Cers2	2	gene	215986084	215994332	+	5	ensembl	protein_coding	4.75404	5.13457	4.9595	3.80288	4.10361	5.05822	5.20228	4.93875	4.92422	5.33695	4.71298	5.27412	5.14422	4.96263	3.92534	4.18219	5.07126	5.16644	4.89045	4.88541
Uri1	1	gene	95435846	95493474	-	5	ensembl	protein_coding	3.51788	3.7411	3.88898	2.79061	2.99401	3.96003	4.01063	4.00091	3.83067	4.18765	3.4472	4.12864	3.68169	3.91551	2.91237	3.11487	3.97478	3.97515	3.98298	3.78929
Commd9	3	gene	98121989	98136421	+	4	ensembl	protein_coding	4.77187	4.97116	5.10652	3.88621	4.21771	5.17017	5.31845	5.23482	5.13198	5.43163	4.70454	5.38456	4.92408	5.11231	3.98945	4.32118	5.19107	5.30467	5.19872	5.10993
Chpf	9	gene	82438465	82443159	-	3	ensembl	protein_coding	7.14307	6.83565	7.112	5.92933	6.01024	6.96819	7.42529	7.24392	7.18935	7.47941	7.16257	7.41234	6.7579	7.11027	6.05464	6.06802	6.94559	7.41962	7.22167	7.18384
Phka2	X	gene	37169606	37247279	-	6	ensembl	protein_coding	2.28927	2.24378	1.7346	0.667543	0.519584	1.80482	1.88214	1.74935	1.74554	1.83844	2.21098	1.30692	2.2359	1.89523	0.72796	0.585721	2.01576	2.05762	1.67348	1.76548
RGD1564319	3	gene	72235317	72236713	+	2	ensembl	protein_coding	-1.17701	-0.234189	-1.06748	-1.72664	-1.68664	-0.792171	-0.0807538	-1.57893	-1.09501	-0.751841	-0.834087	-0.382832	-0.517762	-1.08442	-2.03038	-1.90149	-1.14998	-0.444428	-0.835231	-1.01006
Spire1	18	gene	62411829	62542260	-	5	ensembl	protein_coding	6.45711	6.69644	6.41373	5.34223	5.66748	6.82965	6.87739	6.59328	6.53836	6.71325	6.43355	6.61252	6.65039	6.40626	5.47253	5.73707	6.89299	6.88964	6.52655	6.50741
Igsf11	11	gene	67684930	67819746	+	6	ensembl	protein_coding	4.80557	5.3924	5.43279	4.29863	4.50592	5.88048	5.72739	5.52498	5.32469	5.58964	4.70151	5.50908	5.36914	5.4408	4.41526	4.64398	5.97159	5.68928	5.47842	5.26346
Prl3d2	17	gene	41628896	41635292	-	2	ensembl	protein_coding	-6.2967	-6.2967	-6.2967	-6.2967	-6.2967	-6.2967	-6.2967	-6.2967	-6.2967	-6.2967	-7.16732	-4.59972	-5.06689	-5.18676	-5.10967	-7.16732	-7.16732	-7.16732	-7.16732	-7.16732
Pole3	5	gene	82500187	82503419	-	4	ensembl	protein_coding	4.63344	4.84254	4.5993	3.5367	3.86147	4.92431	4.90558	4.60669	4.64126	5.04009	4.61182	4.97398	4.84254	4.55409	3.62305	3.96987	4.97455	4.82281	4.59849	4.6202
Smarca4	8	gene	22702277	22793519	+	6	ensembl	protein_coding	7.71771	7.94484	7.85286	6.73937	7.08542	7.82107	8.11238	8.14598	7.86993	8.08454	7.68123	7.99271	7.92392	7.85131	6.84888	7.18518	7.80426	8.0925	8.15074	7.84339
Olr704	3	gene	85124089	85125012	-	1	ensembl	protein_coding	-6.7013	-6.7013	-6.7013	-6.7013	-6.7013	-6.7013	-6.7013	-6.7013	-6.7013	-6.7013	-4.99744	-6.89062	-6.89062	-6.89062	-6.89062	-6.89062	-6.89062	-6.89062	-6.89062	-6.89062
Olr1006	7	gene	6204173	6205123	+	1	ensembl	protein_coding	-6.81374	-6.81374	-6.81374	-6.81374	-6.81374	-6.81374	-6.81374	-6.81374	-6.81374	-6.81374	-6.81374	-6.81374	-6.81374	-6.81374	-6.81374	-6.81374	-6.81374	-6.81374	-6.81374	-6.81374
Smc1a	X	gene	21691772	21736383	-	6	ensembl	protein_coding	5.62102	6.14609	5.94248	4.84812	5.22547	5.99871	5.95358	5.99756	5.8306	6.14897	5.58971	6.02882	6.17159	5.93097	4.94915	5.31988	6.05164	5.92236	5.96155	5.78693
Cited2	1	gene	14515629	14518063	+	6	ensembl	protein_coding	4.88524	4.82455	4.91592	3.87234	4.18386	4.83758	4.94236	5.08519	5.09103	5.30557	4.86643	5.2365	4.77817	4.90769	3.98911	4.3009	4.82486	4.87346	5.07588	5.09064
Prss21	10	gene	13033778	13038857	+	1	ensembl	protein_coding	-6.34547	-6.34547	-3.20298	-6.34547	-6.34547	-6.34547	-6.34547	-6.34547	-6.34547	-6.34547	-7.21861	-5.10292	-4.83477	-4.15732	-7.21861	-7.21861	-7.21861	-5.08699	-5.03722	-7.21861
Cr1l	13	gene	118373053	118420106	-	6	ensembl	protein_coding	2.46836	3.21412	3.06976	2.12651	2.03045	3.08765	3.04434	3.07569	3.09215	3.07979	2.49964	2.92002	3.21624	2.99288	2.28268	2.2128	3.05242	3.02953	3.06807	3.01454
Olr402	3	gene	21294631	21295569	+	1	ensembl	protein_coding	-4.95538	-4.95538	-4.95538	-4.95538	-4.95538	-4.95538	-4.95538	-4.95538	-4.95538	-4.95538	-4.7162	-5.51701	-5.25509	-5.38728	-6.02697	-4.55391	-3.0584	-6.20642	-4.42579	-4.40671
Sclt1	2	gene	148123775	148271208	-	5	ensembl	protein_coding	1.22312	1.21278	1.17444	0.150164	0.734171	1.29398	1.07391	1.59299	1.52495	1.75236	1.25467	1.65846	1.22649	1.1675	0.155365	0.923651	1.27476	0.981289	1.56871	1.522
Olr536	3	gene	81246611	81247543	-	5	ensembl	protein_coding	-6.58734	-6.58734	-6.58734	-6.58734	-6.58734	-6.58734	-6.58734	-6.58734	-6.58734	-6.58734	-5.07538	-6.96856	-6.96856	-6.96856	-6.96856	-6.96856	-5.04947	-6.96856	-6.96856	-6.96856
Abhd13	16	gene	84754318	84769135	-	7	ensembl_havana	protein_coding	3.85134	4.00238	3.87824	2.96911	2.99961	4.02968	4.03776	4.04415	3.81824	3.93155	3.8188	3.69733	4.0214	3.90872	3.10464	2.99737	4.08403	4.03738	4.02411	3.86826
Slc5a6	6	gene	36500814	36512084	+	3	ensembl	protein_coding	5.10855	4.99008	4.98215	3.75696	3.97878	4.85825	5.04966	5.1265	4.95305	5.12344	5.1371	5.0205	4.96867	5.0026	3.8805	4.0507	4.84119	5.01225	5.11139	4.9025
Erp44	5	gene	68454074	68548279	-	5	ensembl	protein_coding	4.0056	4.34329	3.86195	3.11496	3.10269	4.0214	4.05901	3.98467	3.90562	4.11341	3.99275	4.03438	4.27223	3.83475	3.21132	3.28356	4.01046	4.00658	3.97772	3.88885
Pnn	6	gene	89685236	89693549	+	5	ensembl	protein_coding	4.26403	4.67631	4.78793	3.3018	4.02812	4.94182	4.60443	4.70254	4.61232	4.86151	4.164	4.76376	4.6542	4.82167	3.40805	4.20814	4.96482	4.54872	4.67081	4.57664
Reg3g	4	gene	174231310	174233865	-	2	ensembl	protein_coding	-6.42845	-6.42845	-6.42845	-6.42845	-6.42845	-6.42845	-6.42845	-6.42845	-6.42845	-6.42845	-7.07722	-7.07722	-7.07722	-5.09666	-7.07722	-7.07722	-4.44821	-5.19903	-7.07722	-7.07722
Med13	10	gene	73600909	73685836	-	6	ensembl	protein_coding	4.17714	4.51589	4.33963	3.10635	3.52098	4.65433	4.44028	4.35148	4.18619	4.14983	4.1569	3.98809	4.51155	4.36056	3.23233	3.62851	4.72024	4.3904	4.31624	4.13731
Cpsf6	7	gene	60387688	60418950	-	6	ensembl	protein_coding	4.99251	5.2925	5.25842	4.04338	4.46742	5.345	5.39819	5.33549	5.30249	5.46984	4.93992	5.37775	5.25389	5.28594	4.15306	4.57221	5.36034	5.37498	5.30404	5.28312
Sgsm2	10	gene	61425575	61466833	-	5	ensembl	protein_coding	6.9674	7.23643	7.13744	6.07349	6.18304	6.98449	7.38279	7.37414	7.09334	7.07142	6.94514	6.93039	7.22914	7.14618	6.20593	6.28043	6.95684	7.36954	7.38308	7.0573
MGC108823	18	gene	54811546	54820264	+	5	ensembl	protein_coding	-0.279287	-0.0527239	0.806752	-1.45828	-0.750363	1.30718	1.3131	-0.390134	0.347006	1.12451	-1.11868	1.12666	-0.202696	0.947176	-1.07697	-0.977652	1.27462	1.43389	0.0808906	0.480522
Enpep	2	gene	252991593	253065721	-	1	ensembl	protein_coding	-0.182645	-0.6187	-0.917341	-1.32174	-1.68626	-0.0986073	0.00412999	-0.673152	-0.261818	-0.107519	0.0999056	-0.483253	-0.407577	-0.938579	-1.42157	-1.61561	-0.159228	-0.2227	-0.52876	-0.186291
Prss30	10	gene	13164168	13167857	-	3	ensembl	protein_coding	-1.24301	-1.62601	-1.23946	-2.72731	-2.68426	-2.11003	-1.00209	-1.38976	-1.85713	-2.5847	-1.23391	-2.94798	-1.81968	-1.34472	-2.67191	-2.39642	-2.30139	-1.14942	-1.19055	-1.40778
Mreg	9	gene	79264980	79318250	-	4	ensembl	protein_coding	-0.219752	-0.349648	-0.805836	-3.42286	-2.54671	0.06091	-0.0763736	-1.55451	-0.507781	-0.67404	-0.355375	-0.887256	-0.300079	-0.708746	-3.74953	-1.65383	0.0518452	-0.0588224	-1.81736	-0.617449
Pofut2	20	gene	14281734	14292670	-	6	ensembl	protein_coding	4.67483	4.72863	4.68725	3.46604	3.55935	4.64375	4.99575	4.82492	4.74828	5.04452	4.6649	4.96129	4.69874	4.68676	3.57566	3.62382	4.62128	4.99693	4.81117	4.73276
Utp20	7	gene	29399170	29479994	-	6	ensembl	protein_coding	2.95992	3.22558	2.80555	1.83414	1.98889	3.037	3.25011	3.09531	2.97695	2.98807	2.97119	2.84343	3.23269	2.77639	1.93994	2.09617	3.03254	3.24404	3.0693	2.95584
Esr2	6	gene	108576664	108616585	-	7	ensembl	protein_coding	-1.80977	-0.501421	-1.16467	-1.8823	-3.56653	-0.393285	-1.3573	-0.988172	-1.72269	-0.829224	-1.69573	-0.73766	-0.468541	-1.15101	-2.03422	-3.58886	-0.296854	-1.42969	-1.01499	-1.79782
Sprn	1	gene	219536513	219536956	-	2	ensembl	protein_coding	4.17264	4.07506	4.67315	3.23127	3.34747	4.36225	4.70084	4.80417	4.60124	4.78067	4.12602	4.65532	4.03102	4.72323	3.38559	3.43853	4.32352	4.65763	4.79102	4.61687
Hexim2	10	gene	90988728	90994489	+	4	ensembl	protein_coding	2.66896	2.58291	2.74963	1.27109	1.61312	2.89292	2.78325	2.96374	2.71304	3.18047	2.64765	3.10587	2.58541	2.76237	1.37019	1.67614	2.89045	2.73868	2.96353	2.67883
Ankrd34b	2	gene	41203747	41219671	+	3	ensembl	protein_coding	1.84286	1.00222	0.854758	0.34979	0.708472	0.712818	1.38974	1.60782	0.677618	1.15488	1.92587	1.04986	0.926404	0.7761	0.503507	0.884424	0.617435	1.32617	1.61222	0.678992
Pkd2	14	gene	6581342	6624595	-	5	ensembl	protein_coding	3.6854	4.00989	4.04305	2.77586	3.18353	4.33879	4.41698	4.17521	3.98122	4.23466	3.61236	4.14658	3.9743	4.0471	2.91399	3.31839	4.37863	4.39501	4.14158	3.91666
Wdr60	6	gene	153007323	153061842	-	6	ensembl	protein_coding	2.50699	2.67958	2.93821	1.43597	1.98162	3.0812	2.87905	2.96875	2.74678	3.12855	2.43215	3.0277	2.66509	2.98687	1.49752	2.17277	3.08586	2.82296	2.91448	2.74129
Arrdc1	3	gene	2112659	2119716	-	6	ensembl	protein_coding	3.01844	3.08723	3.27732	2.02158	2.04344	3.15265	3.35389	3.28624	3.28734	3.61354	3.00192	3.57255	3.04564	3.31839	2.13805	2.08397	3.14064	3.32479	3.24239	3.27332
Csmd1	16	gene	78123917	78434380	+	4	ensembl	protein_coding	5.03019	5.31876	5.07008	3.93819	4.18698	5.22645	5.32732	5.15281	4.85907	4.68115	5.02041	4.53491	5.32004	5.06734	4.03531	4.28542	5.28276	5.31083	5.13473	4.79925
Lyrm7	10	gene	39955373	39974260	-	1	ensembl	protein_coding	3.9195	3.9238	3.4679	2.94567	2.59629	3.68836	3.6291	3.81199	3.76397	4.15337	3.98048	4.08686	3.9259	3.41073	3.1374	2.65693	3.6771	3.52657	3.76199	3.73598
Olr562	3	gene	82183821	82184777	+	1	ensembl	protein_coding	-6.69647	-6.69647	-4.39222	-6.69647	-6.69647	-6.69647	-6.69647	-6.69647	-6.69647	-6.69647	-6.90547	-6.90547	-6.90547	-4.65005	-6.90547	-6.90547	-6.90547	-4.76663	-6.90547	-6.90547
Sgk2	3	gene	165557662	165581916	+	4	ensembl	protein_coding	-0.0685425	1.05234	0.318903	-1.37534	-0.726573	0.942039	0.464576	0.11924	0.872521	0.662583	-0.174842	0.652335	0.955798	0.252932	-1.31964	-0.624674	0.936504	0.481775	0.162216	0.939344
Zfp161	9	gene	117205246	117206593	+	5	ensembl	protein_coding	1.80872	1.99097	2.41778	0.782821	1.11683	2.17254	2.12687	2.10411	2.22741	1.97145	1.82592	1.80724	1.92335	2.46454	0.859165	1.25098	2.18404	2.06033	2.11844	2.2255
Tnfsf13b	16	gene	84714924	84745131	-	7	ensembl_havana	protein_coding	-4.75125	-2.67445	-1.36638	-3.46402	-2.73449	-2.42109	-2.96729	-1.79677	-1.65358	-1.29919	-6.32844	-1.58217	-3.18679	-1.28549	-2.73843	-2.40826	-2.26994	-2.60823	-1.23933	-1.48144
Lrit2	16	gene	14221994	14226425	+	1	ensembl	protein_coding	-6.27492	-6.27492	-2.5997	-6.27492	-6.27492	-6.27492	-6.27492	-6.27492	-6.27492	-6.27492	-5.13533	-5.16812	-4.90115	-3.72077	-7.27448	-7.27448	-7.27448	-7.27448	-7.27448	-3.77621
Cnot1	19	gene	9653369	9746683	+	5	ensembl	protein_coding	6.16795	6.48194	6.25418	5.20712	5.32698	6.33033	6.44099	6.26823	6.14855	6.22682	6.15543	6.09042	6.49338	6.27455	5.34645	5.41217	6.34526	6.42633	6.20741	6.1017
Pak6	3	gene	117007787	117026619	+	6	ensembl	protein_coding	5.00413	5.47335	5.48258	4.1443	4.44094	4.96981	5.86601	5.44477	5.18211	5.07115	5.01104	4.91096	5.42619	5.5163	4.32015	4.54264	4.8541	5.92117	5.43301	5.1436
Heph	X	gene	66393130	66488433	+	6	ensembl_havana	protein_coding	0.993322	0.560353	0.541413	-0.408196	-0.561432	1.06875	0.46379	0.64517	0.207995	1.1523	0.998462	1.09878	0.620073	0.433049	-0.358698	-0.328268	1.09071	0.348875	0.566151	0.194336
Mier1	5	gene	126512781	126559155	+	6	ensembl	protein_coding	3.80642	4.28644	3.93869	2.76236	3.14778	4.28433	3.9486	4.06996	4.06622	4.3105	3.76161	4.23673	4.28647	3.93841	2.86143	3.26096	4.3414	3.88105	4.01221	4.04105
Olr641	3	gene	83628908	83629816	-	3	ensembl	protein_coding	-6.69864	-6.69864	-6.69864	-6.69864	-6.69864	-6.69864	-6.69864	-6.69864	-6.69864	-6.69864	-6.89244	-6.89244	-6.89244	-6.89244	-6.89244	-6.89244	-6.89244	-6.89244	-6.89244	-4.95442
P2rx7	12	gene	41242368	41284797	-	6	ensembl	protein_coding	2.77519	3.19738	3.4113	2.17738	1.96554	3.44954	3.40226	3.03886	3.00369	3.39282	2.70344	3.23708	3.1253	3.50828	2.37254	1.98986	3.4706	3.39179	3.00713	3.00793
Rpl4	8	gene	68827907	68833042	+	6	ensembl	protein_coding	7.15513	7.49911	7.28163	6.27325	6.43391	7.39215	7.46352	7.49121	7.39356	7.65812	7.1701	7.6057	7.48552	7.24678	6.39944	6.53254	7.36733	7.42956	7.45469	7.34992
Gtf3c5	3	gene	12495485	12515790	-	5	ensembl	protein_coding	4.24655	4.41588	4.19504	3.1663	3.2805	4.43827	4.57456	4.48631	4.29079	4.55709	4.21911	4.46413	4.38583	4.20722	3.28908	3.32241	4.45023	4.57242	4.47174	4.26914
Zc3h12a	5	gene	146878973	146887760	-	5	ensembl	protein_coding	0.482123	0.323936	0.812272	-1.00415	-0.865565	0.670839	1.24132	0.316842	0.429068	0.683041	0.376951	0.438483	0.273046	0.78761	-0.799504	-0.839982	0.810791	1.21477	0.306698	0.520872
Unc45a	1	gene	143071176	143086028	-	6	ensembl	protein_coding	5.72998	5.66716	5.79477	4.54209	4.53265	5.74664	5.96801	5.97582	5.71804	5.95941	5.72283	5.86316	5.62237	5.82325	4.66031	4.60061	5.75676	5.94089	5.9592	5.68519
Tube1	20	gene	45947864	45965854	+	5	ensembl	protein_coding	1.04459	1.14517	1.39353	0.251527	0.362724	1.13459	1.26594	1.15407	0.601418	1.46244	1.08509	1.34948	1.15723	1.47184	0.439901	0.534164	1.12729	1.18798	0.993414	0.469596
Acer1	9	gene	9062245	9093261	+	1	ensembl	protein_coding	-3.36604	-2.02814	-1.38218	-1.68542	-6.03852	-1.46042	-1.72413	-1.83565	-2.83518	-1.20011	-4.17486	-1.65677	-1.84634	-2.04603	-2.17045	-3.96026	-1.56189	-2.21974	-2.69294	-1.2265
F2	3	gene	87228705	87242228	-	4	ensembl	protein_coding	-2.97197	-1.83565	-2.86607	-4.2429	-4.20836	-2.32996	-2.32457	-3.36056	-3.36384	-3.37495	-3.02683	-2.73738	-1.85322	-2.8917	-3.79492	-3.83307	-2.65077	-2.71518	-3.99183	-3.38393
Ntm	8	gene	30074875	30510958	-	3	ensembl	protein_coding	4.8553	4.88632	4.95793	3.97977	3.99875	5.10683	5.25838	5.06719	4.74871	5.1762	4.75482	5.10432	4.82252	5.00139	4.16062	4.02039	5.13801	5.23808	5.07134	4.72391
Trpa1	5	gene	3764788	3818026	+	2	ensembl	protein_coding	-2.44898	-4.05772	-3.45011	-4.37645	-4.34109	-1.99548	-2.68871	-2.99047	-2.6422	-2.14895	-2.32074	-2.36506	-4.49997	-3.1878	-4.5537	-3.11479	-2.05523	-2.92964	-3.27264	-2.84062
Alox15	10	gene	56704495	56713186	-	5	ensembl	protein_coding	-1.7337	-0.336618	0.265481	-0.533126	-2.13571	-0.558319	-0.419093	-0.186724	-0.136039	-1.12507	-1.89984	-1.36842	-0.152361	0.257884	-0.150232	-2.10474	-0.555406	-0.546499	-0.173288	-0.206014
Plin2	5	gene	108985563	108999161	-	4	ensembl	protein_coding	2.81423	2.9149	3.13094	1.52892	1.98146	3.5893	3.70169	3.09405	3.23472	3.62049	2.77018	3.53567	2.83356	3.11743	1.63984	2.11244	3.67757	3.7348	2.99992	3.1893
Ap2s1	1	gene	79918162	79929502	+	4	ensembl	protein_coding	7.24315	6.92521	7.16763	6.03765	6.14961	6.82425	7.28017	7.42282	7.41666	7.73729	7.26122	7.7139	6.81397	7.17083	6.16759	6.24356	6.75748	7.23309	7.40981	7.43299
Trub2	3	gene	13681673	13691949	-	2	ensembl	protein_coding	4.89656	4.86934	4.77882	3.59617	3.68482	4.92631	5.04484	4.9361	4.91869	5.07728	4.90117	4.97517	4.82201	4.76586	3.65797	3.77102	4.97709	5.02178	4.91916	4.91769
Snapin	2	gene	209309041	209311590	-	5	ensembl	protein_coding	4.3429	4.65495	4.28746	3.22513	3.23166	4.6739	4.5828	4.55556	4.46985	4.85733	4.42795	4.81571	4.47473	4.31669	3.42356	3.20726	4.62192	4.61139	4.52178	4.46054
Mir466d	17	gene	73485195	73485287	-	1	ensembl	miRNA	-6.81374	-6.81374	-6.81374	-6.81374	-6.81374	-6.81374	-6.81374	-6.81374	-6.81374	-6.81374	-6.81374	-6.81374	-6.81374	-6.81374	-6.81374	-6.81374	-6.81374	-6.81374	-6.81374	-6.81374
Nudt15	15	gene	59141909	59178909	-	4	ensembl	protein_coding	-0.637333	-0.843589	-0.261759	-1.74717	-1.87248	-0.032879	-0.463092	-0.546787	-0.41428	-0.190793	-0.780112	-0.271862	-0.951099	-0.274845	-1.74003	-1.60472	0.175142	-0.434635	-0.576438	-0.551559
Usp25	11	gene	19095389	19215605	+	6	ensembl	protein_coding	3.52432	3.88805	3.52143	2.09165	2.67245	4.17397	3.95811	3.64125	3.53316	3.63549	3.60875	3.59416	3.83712	3.44302	2.3201	2.77147	4.25114	3.81247	3.49294	3.50871
Vom2r46	2	gene	174115388	174148481	-	4	ensembl	protein_coding	-3.56185	-3.26155	-4.26059	-4.41886	-6.50419	-4.33135	-4.32654	-4.28215	-6.50419	-6.50419	-2.48896	-4.81232	-4.53384	-7.0095	-3.19854	-4.61537	-4.74757	-4.79577	-4.74409	-7.0095
Ddx41	17	gene	11740661	11746052	+	5	ensembl	protein_coding	4.1567	4.21048	4.20668	3.11629	3.41388	4.39498	4.71942	4.55159	4.30075	4.83314	4.19778	4.68551	4.23494	4.23063	3.19404	3.47707	4.33577	4.69451	4.54537	4.3083
Dhx35	3	gene	160256785	160313877	-	5	ensembl	protein_coding	3.48646	3.42128	3.63382	2.28424	2.35669	3.36841	3.56353	3.52075	3.31196	3.55295	3.5158	3.45064	3.3841	3.67381	2.40117	2.43391	3.3775	3.50041	3.47494	3.28779
Rbbp9	3	gene	145131500	145138290	-	4	ensembl	protein_coding	2.66536	2.90799	3.00902	1.81846	1.88787	3.12754	3.0411	2.93035	2.94452	3.47703	2.49973	3.30221	2.96294	3.04504	1.95855	1.94833	3.36867	2.87609	2.82118	3.02648
Ofd1	X	gene	29955456	29996219	+	5	ensembl	protein_coding	2.06495	2.33014	2.33279	0.858063	1.29527	2.68825	2.31017	2.33546	1.99379	2.55649	1.99885	2.46434	2.29751	2.37158	0.904317	1.50398	2.75577	2.29383	2.27922	1.89601
Swi5	3	gene	16656851	16665969	-	4	ensembl	protein_coding	5.57669	5.71601	5.63772	4.4719	4.608	5.49043	5.73434	5.71601	5.68813	6.04096	5.5928	5.96807	5.64783	5.64798	4.57062	4.70841	5.50426	5.66851	5.6973	5.67442
Npy	4	gene	144233780	144240952	+	5	ensembl	protein_coding	4.00827	4.1607	4.13195	2.96874	3.42294	3.55294	3.97479	4.59169	4.06383	4.49631	3.99166	4.41945	4.08383	4.12544	3.10146	3.61274	3.45703	3.91831	4.5798	4.08242
LOC100125367	13	gene	116445798	116448210	+	3	ensembl	protein_coding	2.18497	1.8348	1.78511	0.344745	0.772949	1.89651	1.73249	1.98913	1.61643	2.18695	2.22999	2.04956	1.86982	1.77445	0.262506	1.05466	1.96088	1.63081	1.89216	1.61924
Pax7	5	gene	161947625	162044971	-	6	ensembl	protein_coding	-6.11133	-6.11133	-6.11133	-6.11133	-3.73748	-6.11133	-6.11133	-6.11133	-6.11133	-6.11133	-7.32853	-3.84899	-4.37538	-7.32853	-7.32853	-3.98538	-7.32853	-7.32853	-4.58123	-5.30584
Agfg1	9	gene	88354885	88410583	+	6	ensembl	protein_coding	5.05727	5.28887	5.14043	4.08548	4.11942	5.20059	5.21103	5.12696	5.1733	5.25885	5.03565	5.15384	5.26132	5.15409	4.21	4.194	5.19321	5.17831	5.10988	5.17189
Ak8	3	gene	12630119	12742333	+	5	ensembl	protein_coding	-0.389749	0.158679	0.236366	-1.42309	-1.25631	0.193279	0.114607	0.54471	0.163991	0.711502	-0.435354	0.649401	0.00459004	0.368398	-1.2794	-1.31879	0.273658	-0.0135031	0.544169	0.26081
Ppp1cc	X	gene	120060219	120061482	-	2	ensembl	protein_coding	2.91322	3.01349	3.0501	1.7688	1.8045	3.10543	3.09722	3.12692	2.95788	3.36883	2.83844	3.37582	3.34238	3.0131	1.97157	1.75596	3.19843	2.96529	2.96058	2.78481
Stam	17	gene	82954327	83002354	+	5	ensembl	protein_coding	5.51633	5.6935	5.5461	4.48725	4.6276	5.56703	5.64618	5.73169	5.61963	5.79394	5.51403	5.69473	5.67732	5.55648	4.59763	4.69309	5.56053	5.59999	5.71447	5.62097
Ly6g5b	20	gene	7180149	7181158	-	2	ensembl_havana	protein_coding	-3.26155	-6.12717	-2.66465	-2.8432	-2.80131	-6.12717	-3.22682	-3.96307	-2.69232	-2.34734	-3.27538	-2.5265	-7.40206	-2.16096	-3.44088	-3.07656	-3.63595	-3.69419	-3.63175	-3.21038
Col1a2	4	gene	31405253	31440179	+	5	ensembl	protein_coding	1.22409	1.29781	1.79771	0.614643	-0.399	2.67024	2.38826	2.02841	1.19537	2.39326	1.44382	2.02839	1.09622	1.76357	0.502496	0.0701901	2.70484	2.41247	2.06826	1.12055
Aasdhppt	8	gene	1433781	1444562	-	6	ensembl	protein_coding	3.77552	3.81859	3.54458	2.48892	2.64093	3.72367	3.51083	3.53139	3.85013	3.96432	3.79993	3.90352	3.79702	3.51814	2.59169	2.75933	3.76838	3.39331	3.44942	3.86815
Tnnt3	1	gene	222561418	222578412	+	7	ensembl_havana	protein_coding	-2.49152	-5.16752	-3.12701	-5.16752	-5.16752	-2.46396	-3.18698	-5.16752	-5.16752	-3.15921	-3.96106	-3.71562	-5.06993	-3.51962	-4.50646	-5.17615	-3.15269	-2.55392	-3.91274	-4.69808
Csnk1d	10	gene	109736328	109769940	-	4	ensembl	protein_coding	7.23171	7.41675	7.1781	6.13773	6.24204	7.27666	7.44562	7.44573	7.1875	7.45912	7.23227	7.36533	7.40553	7.16898	6.26423	6.30937	7.28591	7.41975	7.42294	7.14666
Kalrn	11	gene	72701013	73115328	+	7	ensembl	protein_coding	7.90071	8.32672	8.17216	6.99386	7.2616	8.28994	8.5244	8.3663	8.06603	8.15673	7.84776	8.02759	8.31917	8.16955	7.12604	7.37669	8.30435	8.52999	8.34838	8.00894
Clpx	8	gene	70480810	70535360	+	4	ensembl	protein_coding	3.6441	3.8966	3.84094	2.57636	2.75095	4.12485	3.88396	3.74271	3.78166	4.09166	3.66392	4.03675	3.88803	3.7602	2.66781	2.88101	4.12034	3.86843	3.64013	3.80716
Olr1316	8	gene	61953022	61953960	-	1	ensembl	protein_coding	-6.58533	-4.06954	-6.58533	-6.58533	-6.58533	-6.58533	-6.58533	-6.58533	-6.58533	-6.58533	-4.87603	-6.99887	-4.64364	-6.99887	-6.99887	-6.99887	-6.99887	-6.99887	-6.99887	-4.82575
Tbc1d25	X	gene	15847845	15871454	+	6	ensembl	protein_coding	3.8025	3.85755	3.94433	2.56154	2.71846	3.88506	4.07351	4.06075	3.88027	4.18741	3.78107	4.10143	3.84608	3.97137	2.67474	2.77077	3.88077	4.04633	4.03488	3.86394
E2f1	3	gene	156435530	156446390	-	6	ensembl	protein_coding	2.59467	2.35277	2.47434	1.39418	1.75286	2.92621	2.65521	2.78636	2.92647	3.1662	2.59102	3.1151	2.2631	2.46748	1.54103	1.79974	2.92711	2.59986	2.79531	2.92952
Pdxp	7	gene	120132151	120137599	+	6	ensembl	protein_coding	7.34297	7.1222	7.12629	6.04424	6.27888	7.01527	7.40844	7.42222	7.35797	7.50183	7.36618	7.41474	7.05975	7.11659	6.15924	6.37383	6.96447	7.38572	7.42354	7.35624
Zfp263	10	gene	10781419	10788226	-	6	ensembl	protein_coding	2.62027	2.89259	2.84857	1.5778	1.76881	3.05872	3.14751	2.88883	2.8329	2.85317	2.64249	2.65878	2.85401	2.86208	1.69096	1.89422	3.09544	3.10212	2.87977	2.80931
Olr1071	7	gene	9757296	9758237	-	2	ensembl	protein_coding	-6.57091	-6.57091	-6.57091	-6.57091	-6.57091	-6.57091	-6.57091	-6.57091	-6.57091	-6.57091	-6.9798	-6.9798	-6.9798	-6.9798	-4.92214	-4.94854	-6.9798	-6.9798	-6.9798	-6.9798
Slc35e3	7	gene	60765042	60778112	-	5	ensembl	protein_coding	5.19554	5.12934	5.11734	3.8662	4.04536	5.1768	5.31139	5.16877	5.07005	5.37763	5.19985	5.29623	5.08278	5.12506	3.98317	4.12977	5.19033	5.28935	5.11303	5.04887
Ndufa4	4	gene	38070978	38078251	-	3	ensembl	protein_coding	7.11403	7.13677	6.86613	5.9199	5.8993	6.7986	7.01255	7.15083	6.99221	7.40371	7.20936	7.36502	7.16422	6.78083	6.01678	5.98101	6.79597	6.91983	7.09216	6.96883
Slc9b2	2	gene	259014874	259040106	+	5	ensembl	protein_coding	0.253995	0.573781	0.582579	-0.384159	-1.01875	0.361042	0.62832	0.767332	0.520256	0.778312	0.319891	0.627261	0.558043	0.607734	-0.183433	-1.08031	0.399878	0.517876	0.718615	0.577152
Tk1	10	gene	106458084	106468147	-	1	ensembl	protein_coding	1.55117	1.31086	1.44484	0.21015	0.255369	1.07165	1.65732	1.36332	1.28655	1.59217	1.7298	1.51612	1.31604	1.50638	0.0857154	0.473119	1.04081	1.62462	1.16964	1.28115
Wif1	7	gene	63077688	63147645	+	4	ensembl	protein_coding	2.04026	2.40221	2.22144	1.10272	1.12543	2.00451	2.01025	2.47058	2.27399	2.55276	2.03524	2.55232	2.34963	2.19869	1.23834	1.17294	1.95026	1.99889	2.42845	2.27938
Oprm1	1	gene	44804261	44857206	+	7	ensembl	protein_coding	-2.85034	-1.4187	-1.59507	-2.20097	-1.39541	-2.82613	-2.82184	-4.76113	-2.06831	-4.76113	-2.03617	-4.27105	-2.03571	-2.46978	-2.45337	-2.15856	-3.12414	-2.77682	-2.57567	-2.79774
Vldlr	1	gene	252487250	252518719	+	4	ensembl	protein_coding	4.90192	4.96048	4.89821	3.86797	3.76217	4.78543	4.86463	4.86158	4.88035	4.92691	4.91134	4.80788	4.95942	4.92874	3.99858	3.83139	4.79027	4.80747	4.82532	4.84923
Mbp	18	gene	78473296	78504226	+	7	ensembl	protein_coding	9.08375	9.44368	9.15854	8.07753	8.42397	9.22718	9.28609	9.49502	9.49447	9.64013	8.89416	9.6187	9.47791	9.18981	8.24947	8.59867	9.33831	9.06778	9.43157	9.46399
Tgfb2	13	gene	109681282	109791576	-	6	ensembl	protein_coding	3.16506	3.99889	3.5785	2.39414	2.38461	3.72861	3.76856	3.61757	3.39545	3.47708	3.18526	3.34929	3.9897	3.56647	2.49108	2.44019	3.776	3.72941	3.57616	3.4049
Tmprss13	8	gene	48247921	48277211	+	6	ensembl	protein_coding	0.312937	0.34824	0.527154	-0.175107	-0.744278	0.266858	0.351162	0.851193	0.52135	-0.0282135	0.400839	-0.317449	0.284805	0.483068	0.066945	-0.549439	0.269142	0.321522	0.913088	0.358775
Hrh1	4	gene	209749004	209750533	+	3	ensembl	protein_coding	2.9058	2.76242	2.8115	1.75957	1.94859	3.40113	3.17313	3.04523	3.11019	3.02283	2.92279	2.90218	2.66804	2.79885	1.85918	2.04727	3.5063	3.12809	3.00088	3.10682
Kdm4a	5	gene	140755996	140802764	-	6	ensembl	protein_coding	5.20703	5.61514	5.5094	4.2951	4.55693	5.57163	5.72456	5.57921	5.36607	5.57934	5.1603	5.47199	5.61881	5.52036	4.40872	4.65297	5.58462	5.71348	5.54541	5.32776
P4hb	10	gene	109329599	109341105	-	1	ensembl	protein_coding	6.06758	6.24865	6.16392	5.07797	5.00904	6.39204	6.45606	6.22297	6.15432	6.40101	6.02229	6.31148	6.20754	6.16709	5.20067	5.06643	6.43134	6.45258	6.18682	6.14729
Pacs1	1	gene	227445874	227574749	-	4	ensembl	protein_coding	6.25967	6.27253	6.14676	5.09674	5.21559	6.20144	6.37336	6.30218	6.29728	6.34296	6.2725	6.23716	6.24274	6.14956	5.21259	5.29486	6.20346	6.33466	6.26795	6.29306
Psph	12	gene	32455767	32468317	+	5	ensembl	protein_coding	3.0616	3.135	2.84673	2.04724	2.17673	3.01748	3.47964	3.19437	3.15938	3.46743	3.04377	3.40274	3.08655	2.86125	2.19498	2.20359	2.98973	3.51791	3.15087	3.13421
Homer2	1	gene	144387111	144478036	-	5	ensembl	protein_coding	2.25114	1.86789	2.00466	1.07852	0.816871	2.26561	2.68579	1.94261	1.5716	2.35314	2.26903	2.25462	1.7169	2.05837	1.18777	0.92548	2.33145	2.6893	1.88335	1.52155
Rpl38	14	gene	104186108	104186320	+	3	ensembl	protein_coding	5.08078	5.34683	5.29711	4.17143	4.19558	5.43172	5.32647	5.36621	5.23214	5.66561	5.16372	5.7711	5.39807	5.09277	4.29283	4.52309	5.00471	5.21128	5.38316	5.27314
Tmem123	8	gene	5995680	5999126	+	6	ensembl	protein_coding	2.01162	2.43098	2.43582	0.966444	0.869785	2.73114	2.58574	2.21341	2.32966	2.86302	1.94423	2.85353	2.39187	2.53902	1.17529	0.992468	2.70744	2.57913	2.01821	2.23644
Scnn1a	4	gene	224853955	224877152	+	5	ensembl	protein_coding	-0.868421	-0.985585	-0.291	-3.351	-2.48112	0.0148882	0.431047	-0.253137	0.206905	0.150052	-0.975415	0.0198781	-0.846108	-0.20243	-2.85747	-2.89583	0.106233	0.324339	-0.236318	0.135751
Acad10	12	gene	42285817	42328188	+	4	ensembl	protein_coding	3.17599	3.26769	3.48185	2.23122	2.19172	3.40883	3.76789	3.71689	3.35847	3.64143	3.1912	3.50586	3.18715	3.42526	2.4036	2.32419	3.49898	3.78868	3.65268	3.26439
Hspa4	10	gene	38383101	38423972	-	3	ensembl	protein_coding	7.23668	7.31187	7.19658	6.02045	6.28048	7.31941	7.27394	7.20779	7.13323	7.51461	7.24784	7.44485	7.2939	7.20245	6.13445	6.36758	7.34225	7.22342	7.14967	7.08863
Pter	17	gene	81874644	81936881	+	4	ensembl	protein_coding	1.97385	3.65466	2.68753	1.88729	2.47424	3.01714	3.16877	3.22754	2.65793	3.07161	1.79681	2.93457	3.6859	2.71056	2.14057	2.60392	2.99666	3.14905	3.239	2.56354
Olr188	1	gene	176959217	176960155	+	2	ensembl	protein_coding	-6.58805	-6.58805	-6.58805	-6.58805	-6.58805	-6.58805	-6.58805	-6.58805	-6.58805	-6.58805	-6.96808	-6.96808	-6.96808	-6.96808	-6.96808	-6.96808	-6.96808	-5.08988	-5.04602	-6.96808
Ubr7	6	gene	135842580	135862537	+	4	ensembl	protein_coding	4.49784	4.70151	4.54166	3.53454	3.59069	4.83751	4.89624	4.67031	4.55126	4.77162	4.47905	4.67435	4.66513	4.52661	3.66091	3.6605	4.88619	4.89294	4.64301	4.50449
Cav1	4	gene	45203434	45236460	+	6	ensembl	protein_coding	3.41086	3.83285	3.36743	2.34893	2.27657	3.84588	3.53798	3.13776	3.48023	3.80496	3.47187	3.68941	3.82221	3.30176	2.47936	2.38429	3.85627	3.47737	3.23208	3.32883
Pdxdc1	10	gene	2110310	2198387	-	6	ensembl	protein_coding	2.84994	3.2094	2.98273	1.68016	2.3356	3.06158	3.29963	2.9721	2.89123	3.0906	2.76685	2.96342	3.2844	2.9741	1.77956	2.41655	3.2508	3.30633	2.84204	2.78891
Thumpd3	4	gene	208284225	208307188	+	6	ensembl	protein_coding	3.058	3.32836	2.86687	1.88823	2.03151	3.14185	3.11331	3.20808	2.96536	3.23313	3.0802	3.09743	3.17069	2.86806	1.9674	2.18573	3.20533	3.14171	3.04024	3.07792
Znrf2	19	gene	54557436	54640013	+	5	ensembl	protein_coding	4.11164	4.33475	4.12823	2.87156	2.91706	4.05575	4.23039	3.96206	3.9923	4.27519	4.03704	4.3948	3.72262	3.96153	2.80422	3.06619	4.12228	4.26059	4.19547	4.31417
Mgat5b	10	gene	105520095	105589480	+	4	ensembl	protein_coding	4.31658	4.87879	4.83132	3.70598	3.91549	4.49907	5.2213	5.09306	4.4675	4.76095	4.24267	4.59961	4.91412	4.81977	3.78145	4.12061	4.47182	5.245	5.0841	4.41088
Grpel2	18	gene	56266330	56278569	-	1	ensembl	protein_coding	3.23232	3.41732	3.20857	2.20426	2.07323	3.54999	3.45062	3.38151	3.13163	3.43136	3.20711	3.33594	3.39991	3.28127	2.12527	2.2403	3.57505	3.4283	3.36588	3.12176
Mir743a	X	gene	151248068	151248143	-	1	ensembl	miRNA	-6.81374	-6.81374	-6.81374	-6.81374	-6.81374	-6.81374	-6.81374	-6.81374	-6.81374	-6.81374	-6.81374	-6.81374	-6.81374	-6.81374	-6.81374	-6.81374	-6.81374	-6.81374	-6.81374	-6.81374
Stx5	1	gene	231876955	231893829	+	5	ensembl	protein_coding	4.46668	4.66503	4.52215	3.58866	3.42332	4.7252	4.78179	4.75474	4.58963	4.82839	4.47769	4.76473	4.58915	4.56672	3.67038	3.50309	4.72603	4.76815	4.73645	4.54317
Olr1739	20	gene	3851241	3852170	+	1	ensembl	protein_coding	-3.99525	-6.31432	-6.31432	-6.31432	-6.31432	-6.31432	-6.31432	-6.31432	-6.31432	-6.31432	-4.40266	-5.19533	-4.94084	-7.20323	-7.20323	-7.20323	-5.13616	-7.20323	-5.13297	-7.20323
Prss8	1	gene	206395299	206399592	-	5	ensembl	protein_coding	-2.27849	-1.14547	-1.60115	-2.7884	-2.23666	-1.18546	-0.949222	-1.0517	-1.23646	-0.879277	-0.652419	-0.925562	-2.57761	-2.71062	-1.82073	-2.65437	-0.617627	-2.04176	-0.239912	-1.11169
Trat1	11	gene	57780653	57820982	+	3	ensembl	protein_coding	-6.78115	-6.78115	-4.57129	-6.78115	-6.78115	-6.78115	-3.84793	-6.78115	-6.78115	-6.78115	-6.81648	-6.81648	-6.81648	-4.43125	-6.81648	-6.81648	-6.81648	-3.70533	-6.81648	-6.81648
Nrm	20	gene	5494940	5498418	-	4	ensembl	protein_coding	-0.746365	-0.775731	-0.357285	-1.9511	-1.5894	-0.0225966	-0.109593	-0.264845	-0.659609	-0.0260833	-0.736483	-0.171267	-0.7962	-0.368476	-1.36437	-1.93355	0.0232866	0.0101449	-0.322162	-0.843538
Olr161	1	gene	175806971	175807930	+	1	ensembl	protein_coding	-6.47645	-6.47645	-6.47645	-6.47645	-6.47645	-6.47645	-6.47645	-6.47645	-6.47645	-6.47645	-5.15121	-5.18023	-7.04439	-7.04439	-7.04439	-7.04439	-7.04439	-7.04439	-5.12234	-7.04439
Tsen54	10	gene	103919116	103926625	-	5	ensembl	protein_coding	3.05276	2.94322	2.75589	1.79413	1.96583	3.07453	3.204	3.26164	2.88609	3.48196	3.04231	3.45054	2.84696	2.7839	1.91247	2.0293	3.05912	3.20348	3.22409	2.86787
Lsm6	13	gene	52469220	52471360	+	4	ensembl	protein_coding	2.29257	2.88766	2.48874	1.28238	1.46484	2.43247	2.52857	2.78356	2.30754	2.92871	2.23862	3.01276	2.56983	2.45091	1.63975	1.19589	2.50286	2.63279	2.59626	2.55735
Zbtb49	14	gene	77303902	77325596	+	6	ensembl	protein_coding	1.78281	1.88781	1.99937	0.828145	1.15002	1.9863	2.06979	2.26514	1.80273	1.95765	1.8226	1.85932	1.8679	2.04615	0.952577	1.18327	1.96159	1.97439	2.27109	1.79087
Azi2	8	gene	125653644	125677999	+	6	ensembl	protein_coding	4.66524	4.6896	4.43357	3.4371	3.60954	4.5499	4.66238	4.6368	4.56903	4.80776	4.65526	4.74239	4.69296	4.45288	3.52731	3.68009	4.55644	4.59993	4.59654	4.5571
Tmem259	7	gene	12940961	12947623	-	6	ensembl	protein_coding	6.52352	6.4973	6.79607	5.48914	5.75491	6.6105	6.93542	6.97238	6.81188	7.05051	6.48703	6.98942	6.42043	6.82241	5.59148	5.85631	6.57373	6.91336	6.97845	6.80899
Snx7	2	gene	239065719	239150147	-	5	ensembl	protein_coding	2.59033	2.93207	2.47841	1.66702	1.40804	2.61232	2.61796	2.58752	2.5732	2.83836	2.62358	2.77046	2.83772	2.44064	1.9174	1.52664	2.45125	2.47415	2.54037	2.72303
Ppp2r2d	1	gene	218132463	218166449	+	7	ensembl	protein_coding	4.60187	4.93782	4.54132	3.64218	3.72768	4.62894	4.69317	4.70629	4.75192	5.00541	4.57389	4.91577	4.9772	4.55948	3.778	3.79691	4.65153	4.62605	4.64089	4.71688
Gsta3	9	gene	26210313	26263967	+	4	ensembl	protein_coding	2.55884	2.77813	3.12855	1.81779	1.83516	3.54784	3.11742	2.86173	2.88553	3.51725	2.52579	3.37487	2.69203	3.18998	1.83627	1.95489	3.56499	3.22175	2.74514	2.94255
Dgkg	11	gene	85059234	85251061	+	6	ensembl	protein_coding	7.40666	7.14968	6.91025	5.79393	5.34585	6.94815	7.23202	6.86026	6.86393	6.95954	7.4841	6.83056	7.14752	6.90441	5.94673	5.37023	6.95837	7.21487	6.78933	6.82416
Cbs	20	gene	12550129	12574252	-	5	ensembl	protein_coding	5.67542	5.88713	5.97666	4.78735	4.83368	6.04462	6.38931	6.02321	5.89064	6.29327	5.63219	6.22774	5.82185	5.98591	4.93418	4.88921	6.05834	6.4066	5.98321	5.86205
Chst11	7	gene	26770955	26981219	-	5	ensembl	protein_coding	5.05984	4.9468	4.92317	3.34013	3.87534	4.95879	5.12698	5.11616	5.01655	4.998	5.08653	4.87681	4.91619	4.91052	3.44682	3.96088	4.97187	5.10239	5.07939	5.01037
Trmt10a	2	gene	261963880	261977434	+	5	ensembl	protein_coding	1.81387	2.04713	1.7015	0.983386	0.868614	2.38966	2.09488	1.96026	2.09667	2.07179	1.83973	1.97453	1.97156	1.68127	1.1748	0.851776	2.42515	2.12784	1.83335	2.14775
Tbc1d2	5	gene	66739641	66785976	-	6	ensembl	protein_coding	1.49284	1.30142	1.73841	0.535751	0.676503	1.50845	1.70513	1.77276	1.67809	1.7563	1.51581	1.51846	1.2362	1.88458	0.539796	0.861451	1.45395	1.69385	1.77812	1.68343
B3gnt5	11	gene	87978737	87990865	-	1	ensembl	protein_coding	-3.83743	-1.84045	-3.04069	-3.8905	-5.72528	-5.72528	-3.80927	-5.72528	-5.72528	-2.05657	-3.42634	-3.97147	-3.55791	-3.76621	-3.63191	-5.46116	-4.55154	-4.62105	-3.869	-4.51946
Vnn1	1	gene	24089368	24099667	-	5	ensembl	protein_coding	-4.47633	-4.21295	-3.59951	-4.53474	-6.55392	-2.13094	-1.95456	-2.50057	-1.61905	-1.63164	-3.15673	-1.48123	-4.32344	-4.47164	-6.92052	-3.51605	-2.1395	-1.97854	-3.11529	-2.11129
Map4k4	9	gene	46343468	46467917	+	6	ensembl	protein_coding	6.89642	7.44659	7.2058	5.96737	6.28227	7.5854	7.38918	7.29775	7.31443	7.35603	6.83198	7.24249	7.45031	7.20774	6.07541	6.37702	7.6455	7.34838	7.25563	7.30679
Nde1	10	gene	11540861	11576271	-	4	ensembl	protein_coding	1.20489	1.74202	1.10456	0.295517	0.425287	1.43854	1.82321	1.4013	1.36858	1.7777	1.06885	1.81917	1.75637	0.942915	0.223406	0.830462	1.27907	1.94366	1.43629	1.28142
Dusp9	1	gene	152917661	152921585	-	4	ensembl	protein_coding	3.48354	3.03008	2.98425	1.86835	2.0101	2.78973	2.8156	3.14875	3.28235	3.16923	3.60353	3.06903	3.01094	2.98665	2.00867	2.09093	2.71433	2.6726	3.14343	3.28188
Tmem254	16	gene	3783384	3787309	+	6	ensembl	protein_coding	4.21838	4.12763	3.98177	3.11432	3.04734	3.92799	4.17147	4.17668	4.21038	4.44333	4.22681	4.39447	4.09738	3.92301	3.26724	3.11597	3.91589	4.1115	4.14931	4.21771
Zdhhc2	16	gene	54635195	54704713	-	5	ensembl	protein_coding	3.77339	3.75551	3.66293	2.38128	2.73005	3.90223	3.91168	3.6843	3.71235	4.12429	3.71837	4.1681	3.77682	3.58879	2.52809	2.80342	3.92346	3.74948	3.68125	3.70023
Ube2m	1	gene	66348960	66351941	+	5	ensembl	protein_coding	7.38811	7.35597	7.35101	6.28926	6.51541	7.19587	7.49606	7.61483	7.42081	7.78015	7.40665	7.72852	7.31433	7.35873	6.43636	6.55416	7.15889	7.45714	7.60347	7.38921
Stmn4	15	gene	48564801	48582956	-	7	ensembl	protein_coding	5.46375	5.98498	5.77858	4.6013	4.97558	5.87022	5.90007	5.85268	5.97945	6.1081	5.39443	5.98589	5.99699	5.73917	4.74388	5.13248	5.90558	5.81506	5.82817	5.97305
Igfbp2	9	gene	79888614	79915188	+	4	ensembl	protein_coding	3.65678	3.0376	2.76861	2.28242	1.87132	3.13811	3.05256	3.68598	2.49823	3.07251	3.7341	2.93761	3.02026	2.7015	2.47612	1.99012	3.11612	2.95355	3.7327	2.40205
Drgx	16	gene	10789827	10819506	+	3	ensembl	protein_coding	1.17032	0.320799	0.119714	-1.38519	-1.00815	-0.10972	0.0420339	-0.216304	0.703762	0.662056	1.22242	0.61858	0.217051	0.0832487	-0.95955	-1.00007	-0.232369	-0.130596	-0.28759	0.768184
Islr	8	gene	62723487	62724773	-	1	ensembl	protein_coding	1.33736	1.44407	1.29052	0.236476	0.18518	1.15848	1.68418	1.52227	1.19659	1.34022	1.34633	1.24827	1.39642	1.26887	0.352727	0.311793	1.11221	1.64048	1.66919	1.04906
Abcf2	4	gene	7135407	7148186	+	7	ensembl_havana	protein_coding	5.85242	5.82421	5.75135	4.72636	4.56899	5.71217	5.93707	5.83683	5.72732	6.00915	5.85161	5.86748	5.80598	5.78668	4.88193	4.59834	5.68414	5.95501	5.84058	5.67412
Grm2	8	gene	114705123	114718170	-	3	ensembl	protein_coding	4.49317	6.31472	6.1741	4.84419	5.65462	5.68937	6.37958	6.46608	5.77796	5.49747	4.31666	5.30775	6.31889	6.20137	5.04072	5.88333	5.64092	6.36951	6.46665	5.74546
Dtd1	3	gene	145200425	145361899	+	6	ensembl	protein_coding	5.69788	5.80626	5.56269	4.84887	4.83983	5.5572	5.75078	5.84357	5.72418	6.04951	5.71399	5.9958	5.77093	5.54059	4.96758	4.93259	5.55951	5.68739	5.82438	5.688
Gtf3c2	6	gene	36383331	36401257	+	6	ensembl	protein_coding	4.51058	4.75878	4.86927	3.5439	3.93431	4.8596	4.86531	4.78739	4.68051	4.90738	4.4492	4.79426	4.77049	4.8966	3.65272	4.07025	4.92624	4.81353	4.71514	4.6286
Eed	1	gene	160493754	160520834	-	6	ensembl	protein_coding	3.46317	3.72124	3.49554	2.31982	2.56847	3.75627	3.47265	3.55329	3.58914	3.87741	3.45692	3.80568	3.70791	3.46673	2.46863	2.69417	3.76654	3.37001	3.49943	3.58097
Fkrp	1	gene	79980703	79986302	-	4	ensembl	protein_coding	5.82478	5.81397	5.81878	4.61699	4.70955	5.67494	5.96551	6.04404	5.94452	5.98651	5.80881	5.88553	5.80061	5.82406	4.73362	4.7698	5.66985	5.92913	6.03503	5.94316
Ano7	9	gene	100167965	100204826	+	2	ensembl	protein_coding	-3.11852	-3.62538	-2.1716	-5.96097	-5.96097	-3.08925	-3.08407	-2.55038	-5.96097	-5.96097	-3.46651	-4.46038	-5.04018	-2.16496	-7.64696	-5.12603	-3.42839	-3.17146	-2.62021	-4.35801
Pcdhb9	18	gene	30182142	30185312	+	5	ensembl	protein_coding	2.53152	3.07829	3.26345	1.91901	2.06156	3.11207	3.25514	2.94404	2.82267	3.55698	2.50833	3.4044	2.90629	3.26255	1.80304	2.41509	3.07425	3.26071	3.01566	2.89438
Hcls1	11	gene	69828261	69850286	-	2	ensembl	protein_coding	2.18168	1.90007	2.57892	0.358181	1.0529	2.56549	2.8787	2.37967	2.43043	3.1336	2.13023	3.08682	1.74866	2.59099	0.461967	1.188	2.57451	2.90351	2.31564	2.45932
Taf3	17	gene	74052964	74076697	+	1	ensembl	protein_coding	2.99547	2.96665	2.98836	1.83453	2.31798	3.01986	3.19193	3.0825	3.01844	3.31469	2.52596	3.54731	2.38496	3.19266	2.18113	2.44924	3.01557	3.09092	3.14795	3.19472
Me1	8	gene	93769078	93863618	-	5	ensembl	protein_coding	6.66348	6.44981	6.25028	5.26131	5.04685	6.39891	6.15258	6.34408	6.38229	6.56941	6.72502	6.48563	6.43185	6.23763	5.42593	5.07224	6.41703	6.05947	6.30083	6.36338
Mir702	12	gene	24733630	24733736	-	2	ensembl	miRNA	-6.81374	-6.81374	-6.81374	-6.81374	-6.81374	-6.81374	-6.81374	-6.81374	-6.81374	-6.81374	-6.81374	-6.81374	-6.81374	-6.81374	-6.81374	-6.81374	-6.81374	-6.81374	-6.81374	-6.81374
Fmc1	4	gene	66088284	66096317	+	3	ensembl	protein_coding	3.3504	3.42821	3.63166	2.37259	2.71475	3.45862	3.46806	3.63988	3.50632	4.03528	3.34898	3.99067	3.13417	3.74922	2.60701	2.66017	3.51915	3.47444	3.68507	3.4369
Actg1	10	gene	109113707	109116306	-	3	ensembl	protein_coding	9.11545	9.15232	9.06794	8.02376	7.98107	9.00609	9.28479	9.20412	9.0613	9.41239	9.13576	9.3551	9.09238	9.07455	8.10992	8.06547	8.96565	9.27786	9.17811	9.05441
Socs5	6	gene	20665943	20696549	+	3	ensembl	protein_coding	5.62799	5.72016	5.60862	4.42163	4.54011	5.55775	5.66177	5.69745	5.63787	5.71818	5.63663	5.62454	5.70349	5.62576	4.53141	4.61319	5.55693	5.61647	5.66332	5.61979
Olr1630	15	gene	30865222	30866193	-	2	ensembl	protein_coding	-6.689	-6.689	-6.689	-6.689	-6.689	-6.689	-6.689	-6.689	-6.689	-6.689	-6.89904	-6.89904	-4.79861	-6.89904	-6.89904	-6.89904	-6.89904	-6.89904	-6.89904	-6.89904
Prkacb	2	gene	271132406	271218985	-	6	ensembl	protein_coding	5.6075	5.96619	5.63394	4.25344	4.74019	5.52488	5.89583	5.70542	5.61073	5.72661	5.59649	5.66038	5.97454	5.62366	4.34288	4.80224	5.5276	5.89228	5.64728	5.59739
Cd247	13	gene	88876070	88950995	+	7	ensembl	protein_coding	-0.150875	1.14293	0.140032	-1.2378	-0.0319861	-0.159145	-0.236159	0.272865	-0.648298	-0.435431	0.0634704	-0.0546263	-0.944011	0.460106	-0.396692	-0.661424	-0.180999	0.102597	0.416258	-0.148549
Sag	9	gene	94646554	94691388	+	5	ensembl	protein_coding	-5.98897	-3.54644	-3.7223	-5.98897	-5.98897	-5.98897	-5.98897	-3.74408	-5.98897	-2.94606	-5.33657	-4.03791	-3.33957	-3.20277	-4.30262	-7.5376	-7.5376	-5.35399	-3.95963	-5.28444
Mir935	1	gene	63322153	63322243	-	1	ensembl	miRNA	-3.00555	-3.69137	-2.58271	-3.8641	-3.52921	-2.46328	-2.3394	-2.32975	-2.5455	-2.38418	-2.8735	-2.8735	-2.8735	-2.8735	-2.8735	-2.8735	-2.8735	-2.8735	-2.8735	-2.8735
Lrrc34	2	gene	136066289	136085758	+	5	ensembl	protein_coding	-1.53724	-0.550545	0.469816	-0.945727	-0.736925	0.873769	0.0778238	0.372367	0.127645	0.650896	-1.60434	0.680755	-0.806524	0.444088	-0.869379	-0.54042	0.909041	0.163153	0.355165	0.0703414
LOC502618	3	gene	19905760	19917524	-	1	ensembl	protein_coding	-6.53455	-3.3244	-3.51393	-4.47012	-6.53455	-6.53455	-6.53455	-3.53758	-3.54104	-6.53455	-3.90081	-7.00905	-3.08567	-3.78455	-4.54925	-7.00905	-7.00905	-7.00905	-3.8623	-3.84104
Gpatch1	1	gene	92659066	92707992	-	6	ensembl	protein_coding	3.50607	3.54077	3.38619	2.1644	2.48502	3.60974	3.68643	3.48838	3.53801	3.61094	3.50036	3.50267	3.57117	3.43056	2.26954	2.56963	3.60926	3.6365	3.43327	3.49296
Hpx	1	gene	177429400	177436973	-	4	ensembl	protein_coding	-1.73374	-2.96637	-6.05944	-4.0703	-2.80206	-1.89541	-2.74069	-2.06639	-3.94291	-2.08208	-1.62909	-2.48047	-2.94813	-5.01517	-3.99839	-2.72302	-2.39547	-2.08443	-2.01612	-5.06911
Car13	2	gene	108055053	108086130	-	3	ensembl	protein_coding	-3.44915	-3.15382	-2.48519	-3.02671	-3.47492	-0.943634	-0.846749	-1.79212	-1.46853	-0.900887	-2.98566	-1.0672	-3.63615	-2.07723	-3.6929	-3.18509	-0.662081	-0.797891	-1.65534	-1.78217
Gnas	3	gene	178426595	178427365	+	4	ensembl	protein_coding	2.7499	2.59476	2.67947	1.40428	1.37022	2.43651	2.77418	2.78759	2.75149	3.13578	3.35523	1.84543	2.11861	3.27736	-0.832508	3.11869	3.20037	3.14869	2.71633	2.73599
Prlr	2	gene	84361344	84554681	-	7	ensembl	protein_coding	-2.89255	-3.36489	-5.54138	-3.66407	-5.54138	-5.54138	-5.54138	-2.36312	-5.54138	-5.54138	-3.4174	-4.92842	-4.55385	-5.76795	-5.6577	-4.01945	-4.84061	-4.90594	-3.73426	-3.7073
Tbc1d9	19	gene	35307319	35408165	+	6	ensembl	protein_coding	5.45465	5.49845	5.47	4.31862	4.39891	5.44236	5.59824	5.49648	5.43766	5.4497	5.47888	5.31955	5.47272	5.4887	4.45682	4.45706	5.44709	5.56333	5.46037	5.42053
Olr581	3	gene	82523694	82524632	+	1	ensembl	protein_coding	-6.74571	-4.19962	-6.74571	-6.74571	-6.74571	-6.74571	-6.74571	-6.74571	-6.74571	-6.74571	-6.85422	-6.85422	-3.22304	-6.85422	-6.85422	-6.85422	-6.85422	-6.85422	-6.85422	-6.85422
Fkbp5	20	gene	10177067	10219361	-	5	ensembl	protein_coding	6.17089	6.21991	5.79104	4.75827	5.10233	6.07476	6.12997	6.34914	5.80422	6.19912	6.19878	6.09339	6.22544	5.74412	4.86761	5.20016	6.09019	6.08564	6.35455	5.73977
Rcn2	8	gene	59280470	59297530	+	5	ensembl	protein_coding	5.71661	5.83101	5.73411	4.49341	4.71425	5.86154	5.77373	5.70958	5.69059	6.00351	5.70499	5.93323	5.79795	5.76318	4.5925	4.80066	5.88786	5.73076	5.64738	5.66982
Gng2	15	gene	8934677	8941164	+	1	ensembl	protein_coding	5.28812	5.46551	5.20378	4.04595	4.237	5.41842	5.36332	5.35562	5.21154	5.58504	5.27083	5.40215	5.45952	5.45907	3.83376	4.07968	5.55718	5.41076	5.47537	5.22598
Cdk5rap1	3	gene	155983803	156241584	-	5	ensembl	protein_coding	3.40563	3.53613	3.43172	2.42121	2.52254	3.50984	3.58368	3.62112	3.34417	3.6809	3.4074	3.61864	3.50004	3.45241	2.51329	2.64704	3.47907	3.55567	3.59157	3.29181
Ebpl	15	gene	45472249	45495637	-	5	ensembl	protein_coding	1.61809	2.12247	2.29941	0.996476	0.679086	2.23364	2.28667	2.15101	1.83464	2.67195	1.53087	2.6428	2.05608	2.37549	1.1836	0.633659	2.29085	2.26856	2.10364	1.80789
Cycs	4	gene	145002164	145004305	-	6	ensembl	protein_coding	5.95683	6.16536	5.63048	4.86289	4.73029	6.02814	5.79832	5.93965	5.7426	6.23291	5.97207	6.15143	6.14484	5.66242	4.97016	4.821	6.02525	5.68854	5.90649	5.74527
Chrna9	14	gene	43670533	43677246	-	3	ensembl	protein_coding	-4.30799	-3.21883	-6.43834	-6.43834	-6.43834	-4.281	-3.48159	-6.43834	-6.43834	-6.43834	-4.87217	-7.12596	-3.75746	-4.76814	-7.12596	-7.12596	-3.99618	-4.05057	-7.12596	-3.97109
Olr6	1	gene	71876783	71877721	+	1	ensembl	protein_coding	-6.46341	-6.46341	-6.46341	-6.46341	-6.46341	-6.46341	-6.46341	-6.46341	-4.10388	-6.46341	-7.09232	-7.09232	-7.09232	-4.92361	-4.83919	-7.09232	-7.09232	-7.09232	-4.98768	-4.97019
Olr1331	8	gene	61716594	61717532	+	1	ensembl	protein_coding	-6.65932	-6.65932	-6.65932	-6.65932	-6.65932	-6.65932	-6.65932	-6.65932	-6.65932	-6.65932	-4.31925	-6.91933	-6.91933	-6.91933	-6.91933	-6.91933	-6.91933	-6.91933	-6.91933	-6.91933
Wfdc15a	3	gene	166776186	166776558	-	2	ensembl	protein_coding	-6.7013	-6.7013	-6.7013	-6.7013	-6.7013	-6.7013	-6.7013	-6.7013	-6.7013	-6.7013	-4.99744	-6.89062	-6.89062	-6.89062	-6.89062	-6.89062	-6.89062	-6.89062	-6.89062	-6.89062
Btbd3	3	gene	137825258	137831600	+	5	ensembl	protein_coding	5.44299	6.40029	6.20157	5.0373	5.27324	6.14932	6.29177	6.26462	5.82892	5.95037	5.34328	5.79365	6.42505	6.23522	5.20697	5.40205	6.1756	6.26307	6.24438	5.75113
Sntb1	7	gene	96019799	96286153	-	5	ensembl	protein_coding	0.141386	0.0722008	0.935567	-0.79181	-1.01573	1.20254	1.33691	0.274433	-0.000422562	0.788426	0.0980035	0.706222	-0.12598	0.973693	-0.55687	-0.868541	1.31153	1.38714	0.0968556	-0.0785509
Tnn	13	gene	82737825	82805182	-	7	ensembl_havana	protein_coding	-3.28879	-2.14578	-2.06101	-2.52161	-2.47912	-2.42111	-1.90672	-2.71994	-1.20514	-1.21771	-1.70714	-1.50604	-2.28361	-1.71454	-2.60943	-2.96701	-2.81271	-1.73012	-3.12565	-1.51069
Yme1l1	17	gene	91466352	91503738	-	1	ensembl	protein_coding	3.84032	4.01241	3.59405	2.44563	2.74235	3.99644	3.70982	3.61832	3.60231	4.04729	3.75238	3.87495	3.88262	3.59939	2.42266	2.98554	4.16222	3.69897	3.56393	3.66629
Mdm4	13	gene	54863121	54899047	-	6	ensembl	protein_coding	2.22098	2.75498	2.54324	1.25546	1.79407	2.8703	2.73655	2.56847	2.21435	2.38381	2.21149	2.26574	2.77567	2.58106	1.33484	1.88445	2.86982	2.71138	2.48883	2.21892
Ky	8	gene	110380954	110420390	+	6	ensembl	protein_coding	1.90864	1.82982	1.56116	0.148499	0.192947	1.65079	1.54869	1.82268	1.94795	1.80623	1.9419	1.63975	1.82975	1.60893	0.355196	0.177947	1.5985	1.53334	1.73213	1.99999
Rbbp8	18	gene	3175473	3239957	+	6	ensembl	protein_coding	2.50849	2.78626	2.72831	1.66682	1.79259	2.97098	2.78588	2.62201	2.72749	2.87243	2.47379	2.74582	2.81262	2.73113	1.82499	1.86495	3.0412	2.79135	2.52982	2.6456
Grin1	3	gene	2489166	2515963	-	6	ensembl	protein_coding	8.11274	7.84806	8.01046	6.66724	6.97609	7.85944	8.10586	8.14268	8.08693	8.29654	8.13188	8.17441	7.83178	8.02914	6.84635	7.00575	7.82968	8.06193	8.0989	8.09621
Krt85	7	gene	140961712	140968249	-	5	ensembl	protein_coding	-4.75862	-4.75862	-4.75862	-4.75862	-4.75862	-4.75862	-4.75862	-4.75862	-2.63262	-4.75862	-4.27651	-4.90746	-4.55898	-3.91713	-5.6012	-5.07188	-3.81332	-4.2994	-5.23	-3.78433
Agmo	6	gene	66448763	66793162	+	4	ensembl	protein_coding	0.450684	1.39534	0.663831	-0.0069022	-0.380317	1.1881	0.936595	1.01301	0.695108	1.08647	0.357839	1.01555	1.43174	0.677827	0.265405	-0.364238	1.26531	0.855854	0.92522	0.611422
Pla2g2c	5	gene	160907867	160927153	+	4	ensembl	protein_coding	0.469142	0.85386	1.30181	-0.56742	-0.0496556	1.40112	1.16314	1.27633	0.622699	1.04652	0.549675	0.909499	0.839518	1.35182	-0.462915	0.163794	1.51237	1.03075	1.21578	0.407252
Itgb3bp	5	gene	122404718	122470214	-	4	ensembl	protein_coding	0.356172	0.60197	0.201036	-0.386942	-0.230699	0.489472	0.394322	0.810667	0.883963	1.09942	0.251771	1.1334	0.65817	0.161209	-0.242618	-0.0883812	0.491873	0.227851	0.800399	0.825705
Mir503	X	gene	152773783	152773853	+	1	ensembl	miRNA	-6.81374	-6.81374	-6.81374	-6.81374	-6.81374	-6.81374	-6.81374	-6.81374	-6.81374	-6.81374	-6.81374	-6.81374	-6.81374	-6.81374	-6.81374	-6.81374	-6.81374	-6.81374	-6.81374	-6.81374
Capza2	4	gene	45541352	45577239	+	4	ensembl	protein_coding	6.90629	7.15464	6.79391	5.75385	5.94792	7.00898	6.86831	6.85104	6.89221	7.27223	6.91075	7.22297	7.16331	6.77389	5.87657	6.02973	7.02219	6.79314	6.79008	6.86676
Gpx4	7	gene	12686678	12688775	-	5	ensembl	protein_coding	7.43827	7.30431	7.47324	6.41429	6.35555	7.15273	7.64794	7.7036	7.53625	7.93995	7.43584	7.78414	7.36717	7.46395	6.66894	6.41792	6.99676	7.67187	7.67346	7.48611
Mbd1	18	gene	69390260	69404711	+	4	ensembl	protein_coding	4.51822	4.90222	4.60655	3.47979	3.70314	4.72117	4.98004	4.90839	4.58545	4.78727	4.47955	4.69405	4.88201	4.60597	3.60938	3.76854	4.68913	4.98267	4.91143	4.56952
Fabp2	2	gene	246442292	246445034	+	2	ensembl	protein_coding	-6.30559	-3.64825	-6.30559	-6.30559	-6.30559	-6.30559	-6.30559	-6.30559	-6.30559	-6.30559	-7.19326	-7.19326	-3.71413	-7.19326	-7.19326	-7.19326	-5.15888	-4.45474	-7.19326	-3.91125
Psmb9	20	gene	6052972	6058393	-	6	ensembl	protein_coding	1.64502	1.95393	2.87671	1.22638	0.859377	2.77805	3.10002	2.59918	2.28449	3.45494	1.53904	3.45072	1.85521	2.93402	1.39399	0.873427	2.81761	3.12514	2.55229	2.23667
Zfp384	4	gene	224541608	224570434	+	7	ensembl	protein_coding	3.65425	3.71162	3.80534	2.3859	2.67055	3.72256	3.86372	3.79208	3.66461	3.87793	3.50861	3.77601	3.69214	3.88458	2.45267	2.97141	3.66362	3.78869	3.7552	3.65564
Tmod1	5	gene	66173406	66228499	+	4	ensembl	protein_coding	4.17666	4.55286	4.54387	3.299	3.53334	4.5476	4.5691	4.41241	4.49382	4.67814	4.11762	4.60651	4.52646	4.56452	3.38949	3.64204	4.56689	4.51771	4.36601	4.50953
Kcnh4	10	gene	88441734	88461552	-	4	ensembl	protein_coding	0.85661	1.604	1.9421	0.536449	1.6255	1.67095	1.94183	1.94314	1.67848	1.71307	0.9041	1.51875	1.55544	1.99123	0.647213	1.79862	1.59071	1.85475	1.93762	1.71369
Olr209	1	gene	177766496	177767446	-	1	ensembl	protein_coding	-4.58331	-4.30991	-6.73992	-6.73992	-6.73992	-6.73992	-6.73992	-6.73992	-4.50971	-6.73992	-6.84113	-6.84113	-6.84113	-4.5228	-4.43256	-6.84113	-6.84113	-6.84113	-6.84113	-3.73909
Phf20l1	7	gene	108561906	108700209	+	1	ensembl	protein_coding	3.58337	3.90553	4.08517	2.36793	3.07706	3.78803	3.63494	3.80637	3.80265	3.87632	3.47955	3.60706	4.06853	3.91151	2.59483	3.05469	3.91007	3.74683	3.94683	3.60747
Atg5	20	gene	50951130	51026118	+	6	ensembl	protein_coding	4.05905	4.04801	3.76491	2.83034	2.80055	3.88972	4.02646	4.09702	3.87337	4.26636	4.10619	4.22917	4.07607	3.67493	2.97313	2.90778	3.84011	3.91941	4.09402	3.83499
Slc6a7	18	gene	55539473	55557598	-	4	ensembl	protein_coding	6.20425	5.68712	5.78321	4.58896	4.32007	5.57506	5.78028	5.79516	5.87889	6.0395	6.29284	5.96007	5.64836	5.775	4.74365	4.35735	5.53939	5.71879	5.75064	5.86642
Sh3tc1	14	gene	79829771	79857492	+	5	ensembl	protein_coding	1.63721	1.46429	2.11244	0.614199	0.146301	2.37039	2.36755	1.89435	1.97826	2.2672	1.58129	2.1942	1.30354	2.17154	0.752706	0.243079	2.44346	2.32988	1.84184	1.99066
Baiap2l1	12	gene	14285463	14373559	+	6	ensembl	protein_coding	-1.15953	-1.60106	-2.61573	-2.78484	-2.40894	-2.69095	-1.8631	-1.46406	-1.63042	-1.4795	-1.462	-1.51085	-1.71295	-2.30782	-1.97035	-2.01299	-2.93768	-2.26396	-2.00359	-1.51594
Cmtm8	8	gene	122160586	122218002	-	4	ensembl	protein_coding	-0.857371	-0.309069	-0.373837	-1.11139	-2.0424	-0.456855	-0.164387	0.358019	-0.0167179	-0.235659	-0.968275	-0.461531	-0.305409	-0.277188	-1.0276	-1.80166	-0.512942	-0.251674	0.439701	-0.0430908
Klk9	1	gene	100798462	100802754	+	3	ensembl	protein_coding	-6.06647	-3.58071	-6.06647	-6.06647	-3.8845	-6.06647	-6.06647	-6.06647	-2.9575	-6.06647	-4.48687	-7.44385	-3.7114	-7.44385	-7.44385	-4.3125	-5.26134	-4.50593	-5.25798	-3.02044
Tspan33	4	gene	56748444	56771953	+	4	ensembl	protein_coding	5.9192	6.18845	5.90589	4.90125	4.92747	5.70093	6.05948	6.13972	5.72967	6.0064	5.91273	5.89347	6.21016	5.91138	5.04618	5.02214	5.65583	6.02111	6.13687	5.66859
Kcnj9	13	gene	95224238	95231331	-	4	ensembl	protein_coding	5.50821	5.77423	5.78803	4.55932	5.02187	5.63387	6.02019	5.95984	5.75721	5.9701	5.46926	5.87467	5.74205	5.80902	4.66478	5.12933	5.61124	6.02208	5.93676	5.73369
Nr2c1	7	gene	35137598	35189641	+	6	ensembl	protein_coding	2.78408	3.10255	2.82783	1.7471	2.02555	3.21683	3.0131	2.86211	2.86485	3.20099	2.78919	3.12249	3.08624	2.78065	1.83894	2.1194	3.26815	2.97327	2.80555	2.86111
Tubb4b	3	gene	2422872	2425633	-	4	ensembl	protein_coding	8.71401	8.65356	8.50329	7.67276	7.6152	8.35124	8.61215	8.75179	8.71248	9.01474	8.72245	8.94656	8.63119	8.50506	7.81913	7.66471	8.32814	8.55934	8.73071	8.69393
Tgif1	9	gene	118636412	118646122	-	5	ensembl	protein_coding	-1.43972	-0.756806	-0.00920926	-1.14409	-2.20727	0.343838	0.555446	-0.390097	0.398671	0.559722	-1.60364	0.471625	-0.725493	-0.119138	-0.887183	-2.06354	0.302227	0.591792	-0.388058	0.331894
Mrpl1	14	gene	14893494	14949596	-	6	ensembl	protein_coding	2.13525	2.49691	2.27405	1.06462	1.23469	1.89727	2.16071	2.17521	2.29222	2.54885	2.1516	2.46478	2.40759	2.42442	1.28195	1.31691	1.87427	2.16498	2.04718	2.14608
Pla2g6	7	gene	120512623	120552754	-	6	ensembl	protein_coding	5.03304	4.95802	4.96971	3.67773	3.63319	4.89445	5.11217	5.0159	5.08782	5.17381	5.02113	5.06681	4.90402	4.98119	3.79382	3.71983	4.85124	5.10643	4.98923	5.12213
Traf1	3	gene	19324027	19339773	-	1	ensembl	protein_coding	-3.18383	-2.06101	-1.75113	-1.74073	-2.11535	-2.05766	-0.509655	-1.26659	-0.803781	-1.02854	-2.44973	-1.24644	-2.36386	-1.50074	-2.19714	-2.46802	-1.15904	-0.313427	-1.59227	-1.22762
Kb15	7	gene	141009311	141017951	-	4	ensembl	protein_coding	-1.17764	-1.86772	-2.48756	-5.18143	-2.16645	-0.334335	-0.511339	-1.74056	-2.51175	-3.23184	-1.85632	-2.2838	-2.14951	-1.38359	-3.30545	-2.44511	-1.49796	-1.31007	-2.17556	-2.80327
Adamts5	11	gene	29034437	29081047	-	5	ensembl	protein_coding	0.0200707	-0.185459	-0.536022	-1.45224	-1.15525	0.270981	0.193577	-0.0412156	-0.647275	-0.169221	0.0883596	-0.356622	-0.371005	-0.556839	-1.42342	-0.630985	0.256236	0.107604	0.044047	-0.859434
Ly96	5	gene	1968030	1984825	-	3	ensembl	protein_coding	-1.96708	-0.862532	-1.45384	-2.2034	-2.57625	-0.776826	-1.65005	-1.36861	-1.2709	-1.38461	-1.89135	-1.39702	-1.18877	-1.55286	-2.14346	-2.18338	-0.496172	-1.37463	-1.84611	-1.44036
Tmod2	8	gene	82109739	82135088	-	3	ensembl	protein_coding	4.83937	5.07075	5.02886	3.47435	3.611	5.17038	5.14766	5.06857	4.77199	5.10181	4.82519	4.99972	5.12193	5.07572	3.53371	3.69308	5.16979	5.12582	5.03412	4.70568
Kcnh6	10	gene	93958632	93979107	+	5	ensembl	protein_coding	2.39743	1.68647	1.89147	0.365874	0.767838	1.94759	2.00113	1.81048	2.20527	2.21314	2.48448	2.13426	1.6839	1.81896	0.477628	0.7893	1.96048	1.94692	1.69741	2.29335
Oprl1	3	gene	180934268	180940194	+	6	ensembl	protein_coding	4.45922	4.24448	3.83514	2.76421	2.59077	3.77388	4.14171	3.98351	3.38686	3.52599	4.53315	3.33778	4.28074	3.84005	2.93951	2.66573	3.77091	4.11604	3.95811	3.26374
Osbpl11	11	gene	73855648	73918639	-	5	ensembl	protein_coding	3.52085	3.80691	3.53595	2.46807	2.83357	3.7741	3.92525	3.79246	3.6347	3.6888	3.51364	3.57018	3.79752	3.52358	2.55739	2.95596	3.79163	3.90651	3.76926	3.59496
Atp2a2	12	gene	41435157	41482924	+	7	ensembl	protein_coding	8.85747	8.79609	8.596	7.47541	7.52177	8.73143	8.80108	8.74643	8.70464	8.80615	8.85006	8.79003	8.79031	8.55296	7.67332	7.55778	8.73741	8.71481	8.69887	8.67092
Olr747	3	gene	109031170	109032108	-	1	ensembl	protein_coding	-6.69311	-6.69311	-6.69311	-6.69311	-6.69311	-6.69311	-6.69311	-6.69311	-6.69311	-6.69311	-6.89623	-6.89623	-6.89623	-6.89623	-6.89623	-4.86497	-6.89623	-6.89623	-6.89623	-6.89623
Slc41a1	13	gene	53681648	53701895	+	2	ensembl	protein_coding	6.75322	6.94451	6.8669	5.67067	5.7687	6.96648	7.22215	7.04099	6.78432	7.06077	6.73421	6.96658	6.92168	6.86851	5.79064	5.83192	6.98377	7.22445	7.01557	6.74138
Gbx1	4	gene	7186865	7211952	+	5	ensembl	protein_coding	-2.53949	-4.54904	-1.6914	-4.54904	-2.56146	-4.54904	-1.2905	-4.54904	-2.47091	-4.54904	-2.60514	-4.08022	-2.19525	-3.13902	-5.8552	-2.03013	-3.23797	-3.08087	-4.19274	-2.88241
Zfp706	7	gene	75948335	75948499	-	5	ensembl	protein_coding	4.90662	5.06601	5.06152	3.70025	3.95818	4.97011	5.11476	5.14428	5.1351	5.20918	4.97062	4.94649	5.08437	5.14942	3.9207	3.8266	4.98073	5.20029	5.16489	5.0219
Myh10	10	gene	55017314	55148294	+	6	ensembl	protein_coding	7.58816	7.734	7.61192	6.4387	6.73653	7.71398	7.87868	7.74973	7.50628	7.81995	7.59019	7.72098	7.71706	7.611	6.54526	6.8277	7.72947	7.86412	7.7142	7.45794
Tg	7	gene	107399165	107585123	+	5	ensembl	protein_coding	-5.2494	-5.2494	-2.08237	-3.39177	-2.65168	-2.60134	-2.59657	-5.2494	-5.2494	-3.28232	-2.79627	-4.70723	-3.8245	-2.84395	-5.04184	-3.56358	-3.44849	-3.52131	-4.13052	-3.72596
Adamtsl4	2	gene	217293458	217305079	-	1	ensembl	protein_coding	0.541762	1.21125	1.56254	-0.161451	-0.172064	2.01895	1.82143	0.956691	1.48195	1.85799	0.587134	1.74442	1.11487	1.5921	-0.0859779	-0.0692755	2.08242	1.75237	0.893401	1.5076
Sarnp	7	gene	3217790	3271833	+	3	ensembl	protein_coding	4.6174	4.71611	4.82476	3.83647	3.8544	4.74634	4.65578	4.8554	4.84752	5.05615	4.80664	5.03829	4.76812	4.72756	3.92306	3.92672	4.77276	4.43977	4.77521	4.8322
Olr419	3	gene	26238850	26239797	+	2	ensembl	protein_coding	-6.81374	-6.81374	-6.81374	-6.81374	-6.81374	-6.81374	-6.81374	-6.81374	-6.81374	-6.81374	-6.81374	-6.81374	-6.81374	-6.81374	-6.81374	-6.81374	-6.81374	-6.81374	-6.81374	-6.81374
Rsad1	10	gene	82098788	82099872	-	1	ensembl	protein_coding	0.778541	0.801318	1.08543	-0.477618	0.166338	1.10126	1.44074	1.07114	0.920282	1.5028	0.931271	1.5053	0.69423	0.903205	-0.54402	0.350958	1.16297	1.30924	0.755791	1.32129
Anapc15	1	gene	173173929	173176117	+	6	ensembl	protein_coding	3.81325	4.0351	3.83989	2.89418	2.77423	3.84573	4.05959	4.04741	3.96961	4.27744	3.8159	4.24454	4.01655	3.81622	3.07479	2.79674	3.78941	4.04134	4.01099	3.94992
Ubqln1	17	gene	9044249	9080134	+	6	ensembl	protein_coding	6.60119	6.70366	6.44763	5.33878	5.58853	6.54804	6.68235	6.59071	6.55913	6.76187	6.62003	6.66442	6.68687	6.43518	5.43771	5.67121	6.55234	6.65602	6.55037	6.54772
Gla	X	gene	105295029	105306686	-	6	ensembl	protein_coding	4.14726	4.21167	3.98339	2.93563	2.96815	4.05405	4.02429	4.04597	4.14567	4.32926	4.16696	4.2429	4.20265	3.97782	3.07215	3.03748	4.06236	3.97009	3.98831	4.12461
Slfn13	10	gene	69956875	69973195	-	5	ensembl_havana	protein_coding	0.766637	1.11782	1.40736	-0.367059	-0.0846234	1.8623	1.62557	0.970441	1.0192	1.58164	0.8742	1.45374	1.31178	1.19742	-0.374467	-0.108681	1.91741	1.52454	1.03928	1.06406
Cebpb	3	gene	170577777	170578880	+	1	ensembl	protein_coding	3.33265	3.7251	4.066	2.72702	3.70605	3.54452	4.10809	4.32563	3.96654	3.95092	3.28626	3.78825	3.50464	4.20106	2.78199	3.8742	3.61055	4.11078	4.36053	3.93425
Tmem252	1	gene	249846417	249851701	+	5	ensembl_havana	protein_coding	-0.893245	-1.56627	-0.465093	-1.37118	-1.739	0.0519799	-0.131125	-0.297862	-0.640898	-1.48427	-1.03282	-1.28524	-1.83067	-0.555473	-1.23888	-1.73867	0.0220485	-0.0405847	-0.363752	-0.472925
Grp	18	gene	60759080	60772845	+	2	ensembl	protein_coding	4.53149	3.37651	3.62972	2.16508	1.80775	1.54873	3.27619	2.44374	4.23774	3.81699	4.6466	3.68889	3.34341	3.68455	2.33405	1.83795	1.4945	3.20055	2.30314	4.30032
LOC500827	7	gene	40357119	40389241	+	5	ensembl	protein_coding	-4.352	-4.07895	-6.50585	-6.50585	-6.50585	-3.52185	-6.50585	-3.46698	-3.47049	-6.50585	-4.80567	-7.02552	-2.7916	-3.86275	-7.02552	-7.02552	-3.94287	-3.99644	-7.02552	-3.91816
LOC498122	11	gene	89401176	89405419	-	1	ensembl	protein_coding	3.71148	3.62701	3.66966	2.57425	2.68346	3.65336	3.95381	3.7995	3.62192	3.993	3.70289	3.88986	3.51644	3.66056	2.76005	2.64621	3.69471	3.99752	3.78526	3.63393
Fxn	1	gene	249400582	249426597	-	7	ensembl	protein_coding	3.69566	3.40071	3.38366	2.24118	2.32104	3.36291	3.54097	3.52356	3.42158	3.97535	3.75493	3.88148	3.26754	3.42576	2.40749	2.37777	3.34423	3.5015	3.49808	3.40783
Hnmt	3	gene	896390	928854	-	5	ensembl	protein_coding	0.548311	0.659119	0.663344	-0.849644	-0.5237	0.851519	-0.157909	0.43434	0.965395	1.58611	0.73089	1.53382	0.454097	0.597636	-0.61605	-0.522681	0.72179	0.0634834	0.313224	0.90067
Ccdc126	4	gene	143671032	143692061	+	5	ensembl	protein_coding	2.60475	2.67183	2.26718	1.52702	1.22577	2.65189	2.50314	2.46225	2.50187	2.78528	2.60503	2.7227	2.63197	2.35122	1.64677	1.28347	2.67133	2.44248	2.40057	2.44544
Top3b	11	gene	91401397	91429763	-	5	ensembl	protein_coding	4.65693	4.88597	4.89423	3.5633	3.92691	4.77082	5.05096	4.99446	4.87645	5.03592	4.62106	4.92121	4.84406	4.95745	3.68871	3.99053	4.78882	5.04247	4.97859	4.82303
Olr1194	8	gene	40192726	40193655	-	1	ensembl	protein_coding	-6.17909	-6.17909	-6.17909	-6.17909	-3.88415	-6.17909	-6.17909	-6.17909	-6.17909	-6.17909	-7.31284	-5.30598	-5.05163	-5.18067	-5.09768	-5.1261	-4.48259	-7.31284	-7.31284	-7.31284
Gstt3	20	gene	16007776	16015160	+	6	ensembl	protein_coding	4.98361	5.53811	5.60507	4.54857	4.43047	5.51626	5.67308	5.66686	5.62836	5.82212	4.89103	5.74377	5.50172	5.62002	4.72785	4.49554	5.52748	5.64739	5.63971	5.618
Rbm12	3	gene	158005713	158023035	-	6	ensembl	protein_coding	3.12054	3.53607	3.14707	2.25923	2.38136	3.35999	3.58525	3.39178	3.2327	3.33121	3.12879	3.21511	3.57838	3.19903	2.35553	2.41428	3.36777	3.55789	3.29026	3.23819
Olr665	3	gene	84054860	84055705	+	1	ensembl	protein_coding	-5.00843	-5.00843	-5.00843	-5.00843	-5.00843	-5.00843	-5.00843	-5.00843	-5.00843	-5.00843	-4.42414	-3.77361	-3.96587	-4.57684	-5.99069	-4.25993	-4.18162	-5.46501	-8.04834	-5.39825
Olr61	1	gene	174060379	174061341	-	1	ensembl	protein_coding	-6.34624	-3.70203	-6.34624	-6.34624	-6.34624	-6.34624	-6.34624	-6.34624	-6.34624	-6.34624	-7.16529	-7.16529	-3.31988	-7.16529	-4.97398	-7.16529	-7.16529	-4.41416	-5.11839	-7.16529
Cabp5	1	gene	76998160	77010997	+	5	ensembl	protein_coding	-6.653	-6.653	-6.653	-3.787	-6.653	-6.653	-4.48204	-4.4378	-6.653	-6.653	-6.92762	-4.72107	-6.92762	-6.92762	-3.63405	-6.92762	-6.92762	-4.70446	-4.65255	-6.92762
Iqgap3	2	gene	206850518	206892647	+	5	ensembl	protein_coding	0.206628	0.066491	0.440141	-2.08639	-0.610599	1.0044	0.78384	0.658448	0.204404	0.360567	0.297325	0.209321	0.0259965	0.320165	-1.67667	-0.398942	0.949989	0.652559	0.529395	0.118793
Mcf2l	16	gene	81326363	81465756	-	6	ensembl	protein_coding	6.24992	6.21364	6.22275	4.91902	5.004	6.12324	6.39017	6.23409	6.11115	6.21141	6.2725	6.07834	6.1824	6.25401	5.03969	5.07339	6.11038	6.38022	6.20578	6.08269
Gripap1	X	gene	16305164	16334935	-	6	ensembl	protein_coding	6.71285	6.71367	6.58127	5.45767	5.77988	6.60113	6.72488	6.80338	6.68902	6.97638	6.71942	6.92183	6.68634	6.56604	5.5687	5.87458	6.57583	6.67119	6.77634	6.67985
Zswim2	3	gene	77799742	77821010	-	2	ensembl	protein_coding	-1.48124	-0.579217	0.224491	-1.55422	-1.37223	-0.466956	-1.06658	-0.154331	-1.39362	-2.16559	-1.22899	-2.48173	-0.479791	0.147982	-1.62225	-1.50927	-0.535082	-1.05867	-0.179598	-1.06209
Phax	18	gene	50857303	50873989	+	4	ensembl	protein_coding	4.55017	4.64891	4.6232	3.82614	3.84814	4.73891	4.75613	4.75962	4.77959	5.07379	4.50478	5.02855	4.6024	4.606	3.97175	3.95212	4.73416	4.70101	4.71218	4.79163
Impa2	18	gene	62201776	62232717	+	4	ensembl	protein_coding	1.25176	1.06153	0.829115	-0.235597	-0.190974	0.982947	0.628814	1.08943	0.963339	1.26793	1.20163	1.38879	1.02958	0.78713	-0.200774	-0.0638048	1.06434	0.501463	1.021	0.918937
Rtn4	14	gene	113792443	113839935	+	7	ensembl	protein_coding	8.50478	8.74113	8.4285	7.4029	7.56107	8.65033	8.50425	8.55002	8.57261	8.82432	8.49688	8.7492	8.73291	8.41872	7.51681	7.63664	8.68057	8.44253	8.50215	8.56348
Magi2	4	gene	10987824	11595537	-	6	ensembl	protein_coding	5.84879	5.99277	5.93918	4.62806	5.11209	5.92395	6.10934	6.00954	5.92128	6.01084	5.83801	5.88095	5.95449	5.97267	4.70926	5.28967	5.91721	6.04894	5.98245	5.90218
B3gnt3	16	gene	19984402	19993283	-	3	ensembl	protein_coding	-1.91834	-2.44375	-2.15287	-3.52071	-5.46125	-3.43927	-2.69001	-2.64413	-2.64739	-1.84969	-1.58043	-3.11447	-4.04105	-2.53354	-3.66999	-2.84627	-2.31746	-3.94989	-3.02067	-1.69364
Mapk12	7	gene	129795269	129805662	-	4	ensembl	protein_coding	1.75663	1.98525	1.77661	0.692881	0.738772	1.77807	2.08777	1.86253	1.56584	2.12526	1.675	2.25752	1.80365	1.75509	0.874265	0.527214	1.9496	2.13953	1.86448	1.52328
Scap	8	gene	117914034	117972289	+	6	ensembl	protein_coding	7.56396	7.58493	7.65857	6.48998	6.49816	7.57908	7.96528	7.81216	7.68451	7.89264	7.54808	7.80809	7.53612	7.67673	6.60884	6.56149	7.55788	7.95489	7.79718	7.67994
Mir485	6	gene	143047656	143047734	+	2	ensembl	miRNA	-6.81374	-6.81374	-6.81374	-6.81374	-6.81374	-6.81374	-6.81374	-6.81374	-6.81374	-6.81374	-6.81374	-6.81374	-6.81374	-6.81374	-6.81374	-6.81374	-6.81374	-6.81374	-6.81374	-6.81374
Olr592	3	gene	82685138	82686073	+	1	ensembl	protein_coding	-6.81374	-6.81374	-6.81374	-6.81374	-6.81374	-6.81374	-6.81374	-6.81374	-6.81374	-6.81374	-6.81374	-6.81374	-6.81374	-6.81374	-6.81374	-6.81374	-6.81374	-6.81374	-6.81374	-6.81374
Kctd10	12	gene	49784215	49801889	+	1	ensembl	protein_coding	5.2329	5.25126	5.17044	4.17919	4.16763	5.27921	5.41428	5.43723	5.16655	5.54205	5.2301	5.46377	5.22065	5.16457	4.32365	4.22549	5.28178	5.39161	5.41935	5.11978
Tmem186	10	gene	5878822	5882132	+	2	ensembl	protein_coding	3.91608	4.13696	3.99899	2.92929	3.03129	3.94329	4.17123	4.10629	3.83122	4.20563	3.92689	4.15722	4.07884	4.07311	3.12916	2.87891	3.96753	4.19058	4.07621	3.79182
Zbbx	2	gene	192810550	192880486	-	6	ensembl	protein_coding	-2.16562	-0.493338	-1.39154	-2.23709	-2.42471	-1.61212	-1.34592	-1.87832	-1.18338	-1.3095	-2.30179	-1.3481	-0.402278	-1.43764	-2.06115	-2.35922	-1.52941	-1.32674	-2.03887	-1.23635
Mtap	5	gene	111679661	111746208	+	5	ensembl	protein_coding	1.03308	1.37638	1.05695	0.22431	-0.447817	1.01998	0.928953	0.821886	0.789432	1.10819	1.06076	0.943313	1.42704	1.07624	0.422256	-0.430312	1.03003	0.940961	0.768555	0.672504
Phykpl	10	gene	36804325	36822140	+	1	ensembl	protein_coding	2.51293	2.72762	2.2269	1.63123	1.51509	2.71717	2.45946	2.6729	2.49918	2.89165	2.28605	2.92512	2.56875	2.57361	1.59375	1.86997	2.41718	2.57273	2.7494	2.29758
Hypm	X	gene	14771915	14772469	+	4	ensembl	protein_coding	-6.46909	-6.46909	-6.46909	-6.46909	-6.46909	-6.46909	-4.15274	-6.46909	-6.46909	-6.46909	-7.08765	-7.08765	-7.08765	-7.08765	-7.08765	-4.86408	-4.98686	-5.03163	-7.08765	-4.96614
Chic2	14	gene	35512033	35546381	+	6	ensembl	protein_coding	1.64778	2.24085	1.86224	0.720943	1.30852	2.08922	1.92481	2.44143	1.89891	2.25297	1.60791	2.1642	2.28473	1.84241	0.800286	1.51918	2.10113	1.81198	2.4353	1.82055
Lhx4	13	gene	78279842	78300742	-	6	ensembl	protein_coding	-2.54271	-3.38888	-1.51875	-6.60785	-6.60785	-3.15954	-4.44609	-4.40203	-3.10679	-3.61789	-2.07415	-3.79789	-4.35419	-1.59553	-6.85529	-3.57665	-3.19477	-4.61881	-6.85529	-2.47579
Pik3r4	8	gene	113675822	113725967	+	6	ensembl	protein_coding	5.23968	5.34484	5.18961	4.18865	3.99769	5.30868	5.39318	5.30172	5.19389	5.3519	5.25758	5.24175	5.31803	5.21367	4.30831	4.05534	5.3292	5.36655	5.25877	5.16064
Samd14	10	gene	82639539	82647961	+	6	ensembl	protein_coding	5.01398	4.39314	4.62232	3.45691	3.46216	4.87127	5.21135	4.77034	4.01796	5.32659	5.1192	5.25713	4.15614	4.66335	3.58134	3.44799	4.8722	5.30629	4.80412	3.93826
Pla2g5	5	gene	160988969	161010285	-	4	ensembl	protein_coding	-0.805753	-1.47827	-1.35451	-2.57413	-3.37312	-1.4383	-0.954268	-1.24319	-0.80806	-1.25961	-0.902306	-1.11887	-1.6042	-1.24582	-2.82627	-3.26422	-1.33809	-1.00881	-1.22564	-0.754981
Olr1622	15	gene	31374818	31375756	+	3	ensembl	protein_coding	-6.58157	-6.58157	-6.58157	-6.58157	-6.58157	-6.58157	-6.58157	-6.58157	-6.58157	-6.58157	-6.97251	-6.97251	-6.97251	-6.97251	-6.97251	-4.94125	-6.97251	-5.09431	-6.97251	-6.97251
Ntrk2	17	gene	8156432	8464507	-	6	ensembl	protein_coding	7.47464	7.62638	7.67602	6.32983	6.46401	8.06603	8.02419	7.63698	7.59762	7.8857	7.64072	7.6017	7.57687	7.66547	6.47914	6.56437	8.03752	8.10157	7.61837	7.49568
Stxbp4	10	gene	77871153	78023722	-	4	ensembl	protein_coding	0.577058	1.18214	0.871149	-0.077238	-0.081665	1.52423	1.32655	0.899105	0.462663	0.683718	0.543184	0.594065	1.15743	0.864025	0.140524	-0.0612585	1.66574	1.33964	0.803168	0.321187
Ak4	5	gene	124130328	124189158	+	1	ensembl	protein_coding	5.26259	5.02623	4.85283	3.49207	3.69846	5.062	5.35241	5.02951	4.83856	5.04409	5.23523	4.92167	5.07131	4.82304	3.89105	3.69264	5.14677	5.19924	4.90151	4.7763
2018-03-11	2	gene	98502842	98603754	+	2	ensembl	protein_coding	1.7082	1.27974	1.3768	0.531713	0.295395	1.27362	1.35465	1.67139	1.30883	1.74163	1.70481	1.76307	1.18255	1.41735	0.648927	0.37228	1.19239	1.3346	1.63832	1.28767
Gstm1	2	gene	230272746	230278303	-	3	ensembl	protein_coding	6.79454	7.12582	7.0057	5.94627	6.0389	7.03946	7.40204	7.26898	7.09851	7.43917	6.75391	7.35367	7.09252	7.02106	6.07457	6.09481	7.04009	7.39308	7.26484	7.07082
Ptprt	3	gene	163763405	164548723	-	3	ensembl	protein_coding	3.87278	3.83111	3.52006	2.37865	2.16317	3.32414	3.5032	3.21045	2.97649	2.89923	3.91544	2.69584	3.86153	3.54371	2.57139	2.24588	3.31081	3.46109	3.13605	2.93754
Olr1406	10	gene	36258273	36259280	+	2	ensembl	protein_coding	-4.50815	-6.67596	-6.67596	-6.67596	-6.67596	-6.67596	-4.47582	-6.67596	-6.67596	-6.67596	-4.71591	-6.91682	-6.91682	-6.91682	-4.5247	-6.91682	-6.91682	-4.73333	-6.91682	-6.91682
Crls1	3	gene	131987548	132005390	+	5	ensembl	protein_coding	2.4342	2.70058	2.69051	1.5709	2.06674	2.86363	2.73066	2.62735	2.71916	3.20129	2.26201	2.98027	2.56555	2.90462	1.79048	2.19542	2.94819	2.811	2.42283	2.72465
Olr1421	10	gene	43888786	43889748	-	1	ensembl	protein_coding	-6.57138	-6.57138	-6.57138	-6.57138	-6.57138	-6.57138	-6.57138	-6.57138	-6.57138	-6.57138	-6.97948	-6.97948	-4.87905	-4.99891	-6.97948	-6.97948	-6.97948	-6.97948	-6.97948	-6.97948
Il22ra1	5	gene	157843037	157867847	+	5	ensembl	protein_coding	-3.89745	-2.42983	-2.01133	-5.85626	-5.85626	-3.87263	-5.85626	-3.09257	-3.8306	-5.85626	-3.84587	-3.89265	-2.70404	-2.60564	-5.21037	-5.24689	-4.41998	-5.45863	-3.7995	-5.37588
Ppp1r9b	10	gene	82616848	82632352	+	6	ensembl	protein_coding	9.91812	9.84458	9.73722	8.63769	8.82442	9.98848	10.1902	9.98886	9.8722	10.0556	9.92632	9.96092	9.8193	9.70784	8.75655	8.89876	10.0019	10.1871	9.95985	9.83884
Apool	X	gene	83639376	83708626	+	6	ensembl	protein_coding	0.21518	1.22441	0.819977	-0.443864	0.263436	1.28276	0.965575	1.01857	0.968208	1.53919	0.0362161	1.38826	1.2525	0.865892	-0.370654	0.518492	1.31096	0.880438	1.08166	0.889666
Bag4	16	gene	70733989	70737834	+	2	ensembl	protein_coding	4.67279	4.83269	4.61274	3.49333	3.74503	4.84844	4.83159	4.87878	4.7149	4.71439	4.70341	4.57984	4.82657	4.58091	3.57641	3.89345	4.92743	4.77383	4.84053	4.64228
Uts2b	11	gene	83876035	83890793	-	3	ensembl	protein_coding	-6.5617	-6.5617	-6.5617	-6.5617	-6.5617	-6.5617	-6.5617	-3.45014	-6.5617	-6.5617	-7.02309	-7.02309	-4.63341	-7.02309	-4.68208	-7.02309	-7.02309	-7.02309	-4.0283	-7.02309
Mea1	9	gene	15516930	15518751	-	3	ensembl	protein_coding	5.96397	5.74542	5.81389	4.53982	4.85888	5.8203	6.0171	6.03197	6.00813	6.38225	5.98938	6.34366	5.67997	5.79957	4.65187	4.93452	5.77907	5.9853	6.00422	6.01416
Cd38	14	gene	71745755	71785718	-	3	ensembl	protein_coding	1.76862	2.08957	1.62691	0.889487	0.485269	2.6783	2.35201	2.0385	1.54271	2.04737	1.57364	2.0666	1.99704	1.44876	0.934146	0.75179	2.70573	2.53439	1.95536	1.55127
Plekho1	2	gene	217601897	217609978	-	5	ensembl	protein_coding	4.37255	4.26649	4.23762	3.06254	3.46624	4.51064	4.68399	4.41075	4.3402	4.88422	4.36853	4.8416	4.23018	4.20583	3.15929	3.58038	4.52825	4.67438	4.34472	4.30208
Gab2	1	gene	168294282	168486053	+	5	ensembl	protein_coding	2.91837	3.09523	2.74584	1.79862	1.27566	3.2267	3.19368	2.90541	2.95183	3.05105	2.93393	2.95207	3.07593	2.7172	1.96382	1.31764	3.27955	3.17039	2.84903	2.90282
Anks1b	7	gene	30922186	31772758	+	6	ensembl	protein_coding	6.01174	6.11272	6.03281	4.72305	5.18273	6.29713	6.22503	6.08144	6.01219	6.23823	6.0187	6.06722	6.16794	6.11151	4.82569	5.13958	6.35371	6.23483	6.04183	5.95607
Arfip2	1	gene	177472247	177476928	-	4	ensembl	protein_coding	5.95231	5.90418	5.92033	4.68804	4.8879	5.84753	6.08804	6.12752	5.97714	6.20022	5.94238	6.12631	5.87415	5.93557	4.78586	4.96636	5.83828	6.06752	6.1021	5.95468
Map3k6	5	gene	155101637	155113501	+	5	ensembl	protein_coding	-0.199005	-0.347808	-0.395905	-0.810274	-1.71909	-0.0115819	-0.217974	-0.0560294	-0.573298	-0.126097	-0.0815273	-0.180642	-0.602014	-0.408132	-0.758604	-1.34303	0.0106437	-0.38199	0.0637971	-0.775558
Yod1	13	gene	52529467	52531852	+	2	ensembl	protein_coding	1.13516	1.16402	1.84242	-0.0532849	0.571389	1.48647	1.78077	1.41745	1.08594	0.953216	0.948845	0.681082	1.19098	1.84029	0.119076	0.898744	1.46554	1.78656	1.29391	1.15852
Actl6b	12	gene	24211506	24227904	-	6	ensembl	protein_coding	5.91936	6.0555	6.03954	4.95818	5.15582	5.68505	6.09247	6.26834	6.05133	6.24664	5.91563	6.16175	6.03369	6.06452	5.08045	5.26024	5.60677	6.04483	6.26467	6.03969
Wnk3	X	gene	21096338	21198949	+	5	ensembl	protein_coding	2.28193	2.50625	2.09301	1.0846	1.06272	2.34134	2.26459	1.85632	1.91837	2.05121	2.27967	1.91938	2.53115	2.06654	1.2321	1.16628	2.37296	2.21288	1.76167	1.91771
Chmp1a	19	gene	66707177	66715457	-	4	ensembl	protein_coding	6.83062	6.69281	6.64906	5.63763	5.54615	6.6306	6.92806	6.79862	6.69256	6.97269	6.85577	6.89188	6.65458	6.64384	5.7792	5.58798	6.61947	6.90699	6.76261	6.67651
Zbtb8a	5	gene	151276506	151303640	-	5	ensembl	protein_coding	-0.273915	0.818981	1.05394	-1.12466	-0.0861555	0.431493	0.775214	0.714931	0.877318	1.32081	-0.350099	1.25541	0.723749	1.06771	-0.971917	-0.0179587	0.479196	0.649115	0.809265	0.863491
Rbm10	X	gene	2548300	2580031	-	6	ensembl	protein_coding	5.52493	5.67216	5.71395	4.51308	4.76195	5.67435	5.95164	5.75611	5.5884	5.79731	5.51047	5.68899	5.63431	5.72942	4.63379	4.84384	5.66857	5.94665	5.73281	5.56503
Orc6	19	gene	38423345	38430600	-	4	ensembl	protein_coding	1.22729	1.43999	1.41437	0.652896	0.266012	1.43523	1.59557	1.64705	1.53709	1.47629	1.14115	1.39305	1.33257	1.42193	0.852739	0.435414	1.44544	1.5483	1.58514	1.53605
Olr1736	20	gene	3808599	3809712	+	1	ensembl	protein_coding	-4.18412	-6.43084	-6.43084	-3.42058	-6.43084	-6.43084	-6.43084	-6.43084	-6.43084	-6.43084	-4.21637	-7.11135	-7.11135	-4.10809	-4.01326	-4.04566	-7.11135	-7.11135	-7.11135	-7.11135
Hibadh	4	gene	147270737	147368793	-	6	ensembl	protein_coding	4.79174	5.09621	4.79277	3.86895	3.90409	5.0884	5.07185	4.94457	4.80147	5.21695	4.76933	5.13925	5.09561	4.78828	3.99032	3.99232	5.12545	5.03563	4.88639	4.75441
Zfp105	8	gene	131156987	131164782	+	4	ensembl	protein_coding	1.28639	2.18085	1.83047	0.686926	0.999384	2.08787	1.79055	2.0423	1.90137	2.08938	1.25112	1.95112	2.22465	1.85664	0.799137	1.09934	2.14278	1.62861	2.04357	1.89852
Cebpd	11	gene	92069789	92070898	+	1	ensembl	protein_coding	2.79859	3.52396	4.02144	2.19532	3.06071	4.01473	4.18214	4.20533	4.1913	4.56162	2.64546	4.50174	3.44097	4.05933	2.29558	3.24941	4.02177	4.15043	4.17988	4.21055
Nod1	4	gene	149781209	149832175	-	5	ensembl	protein_coding	2.35861	2.46096	2.61871	0.824852	1.33756	3.0671	2.92781	2.62423	2.45582	2.98802	2.38215	2.92885	2.41862	2.64639	0.872428	1.39039	3.11514	2.97027	2.55547	2.38397
Tmem80	1	gene	221234795	221243404	+	6	ensembl	protein_coding	4.25195	4.40551	4.31332	3.37879	3.43428	4.39915	4.42443	4.29781	4.41885	4.72999	4.32247	4.68905	4.33277	4.27642	3.4697	3.58596	4.37103	4.34209	4.33236	4.33224
Ces2j	19	gene	487190	494404	+	4	ensembl	protein_coding	-1.94816	-3.81225	-6.16573	-4.13576	-4.09987	-6.16573	-2.14214	-4.00268	-6.16573	-6.16573	-2.70699	-7.40928	-3.94018	-7.40928	-4.88653	-3.48204	-4.18603	-2.98801	-4.18199	-3.61346
Nutm1	3	gene	110329297	110340098	-	5	ensembl	protein_coding	0.308633	-0.129646	-0.0434853	-1.16258	-1.48136	0.10712	0.0244606	-0.120776	0.0727667	0.382337	0.362059	0.354234	-0.128781	-0.187508	-1.07567	-1.23954	0.144614	-0.0691758	-0.280783	0.07802
Svs3b	3	gene	166832006	166833028	-	1	ensembl	protein_coding	-6.69612	-6.69612	-6.69612	-6.69612	-6.69612	-6.69612	-6.69612	-6.69612	-6.69612	-6.69612	-6.89417	-6.89417	-6.89417	-4.91361	-6.89417	-6.89417	-6.89417	-6.89417	-6.89417	-6.89417
Gpr39	13	gene	47120131	47328371	+	2	ensembl	protein_coding	-1.94318	-3.32881	-3.12843	-3.44292	-4.4417	-2.11444	-2.8374	-3.3644	-3.85766	-2.51077	-3.34553	-3.34553	-3.34553	-3.34553	-3.34553	-0.859907	-3.34553	-3.34553	-3.34553	-3.34553
Tmprss11g	14	gene	23058672	23097346	+	5	ensembl	protein_coding	-6.38607	-6.38607	-6.38607	-6.38607	-6.38607	-6.38607	-3.23882	-6.38607	-6.38607	-6.38607	-7.15721	-7.15721	-4.03849	-7.15721	-4.88926	-7.15721	-7.15721	-3.82131	-7.15721	-5.02112
Wscd2	12	gene	50604426	50644721	-	5	ensembl	protein_coding	5.43265	4.84001	5.15036	3.79215	3.86406	5.13688	5.46487	5.27118	5.21769	5.43559	5.47403	5.38396	4.76373	5.11656	3.89856	3.90771	5.16085	5.47785	5.22828	5.19391
Dctn6	16	gene	61461230	61480355	+	6	ensembl	protein_coding	5.94312	6.12388	5.9071	4.96678	4.98513	5.69821	6.08855	6.14225	5.98733	6.27469	5.92555	6.19123	6.12167	5.89857	5.12359	5.04577	5.65534	6.04289	6.13388	5.97856
Cars2	16	gene	82756705	82792874	+	6	ensembl	protein_coding	3.46158	3.49842	3.57785	2.45182	2.45963	3.3688	3.75986	3.56988	3.50586	3.67891	3.53177	3.51989	3.54529	3.69696	2.67223	2.48842	3.22758	3.81127	3.49475	3.34443
Ppp2r5a	13	gene	114599131	114643527	-	5	ensembl	protein_coding	4.94246	5.04939	5.04159	3.90003	4.01982	5.27002	5.2531	5.0925	5.05187	5.28474	4.91884	5.21934	5.00669	5.06957	3.99197	4.12281	5.27344	5.2241	5.04319	5.03557
Prss34	10	gene	14474511	14476268	+	5	ensembl	protein_coding	-5.98733	-2.7835	-3.77059	-5.98733	-5.98733	-3.8405	-3.04498	-5.98733	-5.98733	-5.98733	-3.55358	-4.51365	-3.26294	-4.35812	-7.59184	-4.2909	-5.29112	-4.4948	-7.59184	-4.41477
Mturn	4	gene	149514309	149531680	+	4	ensembl	protein_coding	5.43569	5.27871	4.87103	3.74293	3.76647	5.33036	5.27678	5.16782	5.31656	5.359	5.48118	5.23913	5.23027	4.86948	3.87546	3.7843	5.36467	5.21877	5.15519	5.32693
Rab3c	2	gene	60628055	60843345	-	5	ensembl	protein_coding	3.40417	3.16024	3.38982	1.90878	1.65402	3.39746	3.11362	2.92238	2.96483	2.94546	3.48512	2.83555	3.10039	3.43887	2.05978	1.65118	3.46887	3.02136	2.87426	2.92541
Cldn10	15	gene	107450003	107539150	+	5	ensembl	protein_coding	4.24907	4.55141	4.41444	3.46679	3.25488	4.47891	4.89611	4.52928	4.50699	4.80489	4.20652	4.73492	4.52231	4.4128	3.60816	3.30816	4.49981	4.90314	4.47405	4.48289
Atp6ap2	X	gene	11935610	11963424	-	5	ensembl	protein_coding	7.13403	7.15967	7.04988	5.74528	5.91622	7.14594	7.06705	6.99263	7.04953	7.33348	7.20187	7.3084	7.18608	6.96951	5.93569	5.98013	7.1352	6.94022	6.92212	7.01448
Il11ra1	5	gene	62676351	62683438	+	5	ensembl	protein_coding	3.91078	3.89506	4.14758	2.91051	3.06045	4.40444	4.55132	4.20903	4.13183	4.59718	3.88257	4.54199	3.80729	4.18339	3.01069	3.15133	4.4221	4.55156	4.15414	4.11312
Gsdmc	7	gene	91477763	91490055	-	6	ensembl	protein_coding	-6.13811	-3.72432	-6.13811	-4.05613	-6.13811	-3.96876	-6.13811	-6.13811	-3.92279	-6.13811	-3.44669	-5.22361	-4.94451	-5.08611	-4.99504	-5.02622	-5.15871	-7.42565	-7.42565	-3.76847
Mrpl42	7	gene	36638838	36661936	-	1	ensembl	protein_coding	4.33573	4.52589	4.1194	3.23521	3.40519	4.1313	4.32269	4.29581	4.38824	4.71621	4.35609	4.64492	4.51881	4.1038	3.47602	3.42412	4.10497	4.28639	4.28753	4.27302
Sema4c	9	gene	42783321	42793776	-	5	ensembl_havana	protein_coding	4.33726	4.46799	4.45321	3.46676	3.65604	4.41036	4.41808	4.63208	4.47482	4.57267	4.40204	4.47656	4.47079	4.45506	3.57091	3.70658	4.41272	4.31427	4.61088	4.46944
Phtf1	2	gene	225878015	225916843	+	6	ensembl	protein_coding	4.12935	4.2572	4.04301	3.05466	3.3132	4.03903	3.95995	4.15818	4.09855	4.40709	4.12684	4.33129	4.24947	4.04718	3.17844	3.43106	4.03126	3.88306	4.11611	4.06552
Sstr1	6	gene	88784408	88787878	+	1	ensembl	protein_coding	3.32112	3.34299	3.03469	1.82272	1.34003	2.54353	3.18306	2.94819	2.58299	2.27965	3.36444	2.07568	3.34952	3.05353	1.97954	1.38234	2.51829	3.16485	2.96313	2.54765
Slc30a1	13	gene	115236547	115240420	+	4	ensembl	protein_coding	3.71163	3.80691	4.03783	2.77616	2.6508	3.82969	3.96567	3.89749	3.85849	3.9399	3.68542	3.8454	3.77077	4.07744	2.92032	2.71758	3.83807	3.9194	3.85018	3.84999
Ncoa2	5	gene	10456313	10547228	+	6	ensembl	protein_coding	4.56335	4.80911	4.9423	3.73591	3.86977	5.00463	5.13675	4.84119	4.79363	4.62639	4.51763	4.45741	4.76649	4.98259	3.87173	3.98759	5.04323	5.13286	4.79585	4.76764
Atp6v1g2	20	gene	6901681	6903894	-	5	ensembl	protein_coding	8.50565	8.45938	8.21809	7.25855	7.38369	8.22666	8.40952	8.45539	8.2885	8.66968	8.5396	8.59998	8.44155	8.20042	7.38817	7.46033	8.20121	8.36113	8.43138	8.25133
Sh3pxd2a	1	gene	274477469	274636784	-	4	ensembl	protein_coding	3.57576	3.50838	3.46296	2.22197	2.56213	3.73351	3.74267	3.66684	3.60552	3.5326	3.62471	3.3816	3.45303	3.49645	2.3339	2.63249	3.76927	3.69197	3.62953	3.59935
Galnt14	6	gene	34618799	34832960	-	6	ensembl	protein_coding	4.67474	4.54752	4.72711	3.61462	3.30558	3.87577	4.66432	4.79053	4.58633	4.50691	4.72484	4.40553	4.49943	4.78525	3.80489	3.33375	3.7847	4.63017	4.77049	4.55437
Olr128	1	gene	175087438	175088400	-	2	ensembl	protein_coding	-6.09857	-6.09857	-6.09857	-6.09857	-6.09857	-6.09857	-6.09857	-6.09857	-6.09857	-6.09857	-4.25879	-5.43865	-7.30282	-5.32225	-5.24516	-7.30282	-7.30282	-7.30282	-7.30282	-4.2068
Exoc5	15	gene	29811329	29855876	-	5	ensembl	protein_coding	4.00062	4.19133	4.18966	3.00925	3.16664	4.50176	4.22659	4.06362	4.05705	4.2605	3.98088	4.14869	4.14422	4.21199	3.13953	3.2553	4.59189	4.17991	3.98788	4.02672
Cdc42ep4	10	gene	101923477	101947679	-	4	ensembl	protein_coding	5.96821	6.21598	6.09974	5.004	5.18168	6.36547	6.67816	6.42179	6.11254	6.40646	5.916	6.2981	6.18472	6.09447	5.13316	5.27267	6.38551	6.68822	6.42533	6.05582
Olr773	3	gene	109539497	109540435	+	1	ensembl	protein_coding	-6.54561	-6.54561	-6.54561	-6.54561	-6.54561	-3.54349	-6.54561	-6.54561	-4.30472	-6.54561	-7.03618	-7.03618	-4.59305	-7.03618	-4.6428	-7.03618	-3.97823	-7.03618	-7.03618	-4.78196
Jdp2	6	gene	118780172	118988281	+	5	ensembl	protein_coding	2.65976	2.80708	2.92386	1.57109	2.31309	2.84565	3.04392	3.18612	2.9859	3.39267	2.55427	3.40198	2.74194	2.96728	1.60067	2.5584	2.82684	2.94978	3.15713	2.97086
Ndc1	5	gene	130824420	130868755	+	6	ensembl	protein_coding	1.48961	2.39476	1.83168	0.721875	0.62005	2.09568	2.18331	1.77819	1.45779	1.65931	1.3945	1.49133	2.42221	1.88131	0.888149	0.684735	2.12993	2.16844	1.74451	1.42715
Olr690	3	gene	84797345	84798280	-	1	ensembl	protein_coding	-6.54363	-6.54363	-6.54363	-6.54363	-6.54363	-6.54363	-6.54363	-6.54363	-6.54363	-6.54363	-6.99845	-4.43084	-6.99845	-5.01789	-6.99845	-6.99845	-6.99845	-6.99845	-6.99845	-6.99845
Lhx2	3	gene	27870027	27887928	+	7	ensembl	protein_coding	5.94701	6.04432	6.15892	4.90012	5.3132	6.23773	6.44243	6.27387	6.09474	6.52305	5.90632	6.4615	5.98519	6.17171	4.99666	5.41596	6.24904	6.43434	6.24613	6.06851
Xdh	6	gene	34996983	35059195	-	5	ensembl	protein_coding	2.10932	2.37658	1.70367	0.39949	0.733031	2.14194	2.16804	2.28968	1.5956	1.9971	2.05457	1.84106	2.41518	1.67713	0.517115	0.825254	2.12004	2.17008	2.28394	1.61009
Dohh	7	gene	11358019	11362757	-	5	ensembl	protein_coding	6.02527	5.7417	6.04006	4.8124	5.05249	5.75857	6.14341	6.28162	6.19054	6.50767	6.02464	6.46485	5.65584	6.04527	4.92962	5.14628	5.72	6.09615	6.27816	6.19293
Lrrc23	4	gene	224311988	224322177	-	4	ensembl	protein_coding	2.77296	3.32612	3.47492	1.96561	2.20294	3.41569	3.76621	3.4743	3.18176	3.64696	2.67116	3.56023	3.36413	3.52833	2.17653	2.22819	3.48017	3.74757	3.37781	3.09337
Fut9	5	gene	44660497	44863523	-	4	ensembl	protein_coding	1.0824	1.29054	1.30536	-0.0860682	0.586038	1.90003	1.14283	1.01158	1.25544	0.750837	1.19946	0.627419	1.18736	1.39733	0.00240539	0.793047	1.95204	1.02002	0.833476	1.22643
Dupd1	15	gene	2747987	2787603	+	4	ensembl	protein_coding	-2.86319	-3.06103	-1.4872	-4.20862	-1.808	-1.94771	-1.94196	-1.51297	-1.89291	-1.9056	-3.09057	-1.49023	-3.73327	-1.11515	-3.78935	-1.93302	-1.92905	-2.15434	-1.77616	-1.61803
Ins1	1	gene	280213615	280214178	+	5	ensembl	protein_coding	-6.60426	-6.60426	-6.60426	-6.60426	-6.60426	-4.32787	-4.32282	-6.60426	-6.60426	-6.60426	-6.96435	-6.96435	-3.81576	-6.96435	-6.96435	-6.96435	-4.82886	-4.08973	-6.96435	-6.96435
Cep78	1	gene	240303398	240331196	-	5	ensembl	protein_coding	1.98791	2.40437	2.10291	1.36704	1.27819	2.37705	2.58045	2.29375	1.89789	2.24737	1.96439	2.2247	2.38365	2.10661	1.4669	1.48504	2.33561	2.5231	2.29896	1.74797
Champ1	16	gene	80403595	80414561	-	5	ensembl	protein_coding	4.80722	5.01642	4.83548	3.91499	3.9106	4.85676	4.99846	5.01532	4.90169	4.99369	4.86946	4.93537	5.05333	4.80264	3.92919	4.02974	4.87557	4.93249	4.93711	4.88573
Olr481	3	gene	80052953	80053897	-	1	ensembl	protein_coding	-6.81374	-6.81374	-6.81374	-6.81374	-6.81374	-6.81374	-6.81374	-6.81374	-6.81374	-6.81374	-6.81374	-6.81374	-6.81374	-6.81374	-6.81374	-6.81374	-6.81374	-6.81374	-6.81374	-6.81374
Nudt16l1	10	gene	9596797	9598729	-	5	ensembl	protein_coding	5.68494	5.83485	5.67951	4.64204	4.69552	5.43546	5.8325	5.84658	5.77015	5.98046	5.67991	5.91017	5.82816	5.67465	4.78283	4.76217	5.37272	5.81367	5.81727	5.76045
Chst3	20	gene	31536785	31539327	-	2	ensembl	protein_coding	-0.325558	0.363511	0.52284	-1.0132	-1.07153	0.82961	0.577852	0.42539	0.49368	0.16552	-0.205381	0.130924	0.412594	0.475467	-1.00063	-0.936702	0.865003	0.592062	0.264664	0.370118
Wtap	1	gene	51782341	51806765	-	6	ensembl	protein_coding	3.43092	3.95218	3.54054	2.59005	2.50898	3.75477	3.6277	3.76381	3.66156	3.98978	3.52087	3.813	3.76355	3.61131	2.56453	2.75619	3.87289	3.60193	3.65473	3.66128
Nae1	19	gene	646856	673676	+	4	ensembl_havana	protein_coding	3.39804	3.75124	3.39409	2.33816	2.56235	3.47457	3.27998	3.41716	3.38286	3.74719	3.41015	3.67286	3.73047	3.41071	2.46751	2.63687	3.47197	3.18438	3.37011	3.39063
Cntfr	5	gene	62566649	62594369	-	1	ensembl	protein_coding	6.01217	6.18974	6.37065	4.99584	5.03331	6.14794	6.57045	6.41641	6.28379	6.4463	5.98009	6.36546	6.1602	6.38729	5.12357	5.07436	6.1222	6.56974	6.40257	6.28112
Prkaa1	2	gene	73882080	73914818	+	4	ensembl	protein_coding	2.79795	2.91092	2.78121	1.67488	1.9526	2.8177	2.99071	2.97423	2.73802	2.98709	2.80573	2.85182	2.88618	2.81481	1.75339	2.03704	2.84753	2.9427	2.97988	2.70623
Cpm	7	gene	60654168	60714583	+	3	ensembl	protein_coding	4.4566	5.16464	4.76193	3.72889	4.49878	5.15904	4.87592	5.22557	5.09536	5.43212	4.27594	5.36189	5.04701	4.73302	3.92832	4.6127	5.30259	4.79831	5.28286	5.05619
Gltp	12	gene	49460373	49480640	+	6	ensembl	protein_coding	5.12239	5.12555	5.42146	4.10188	4.29421	5.56618	5.56719	5.47607	5.59136	5.88181	5.06764	5.84421	5.03904	5.43945	4.21515	4.37537	5.58225	5.53424	5.44722	5.60354
Tmem161a	16	gene	20836631	20846231	-	5	ensembl	protein_coding	4.7138	4.58304	4.76275	3.45248	3.5304	4.61305	4.94635	4.9502	4.7424	5.00577	4.70239	4.92415	4.58086	4.77799	3.59524	3.56345	4.57468	4.91699	4.93989	4.7246
Gorasp1	8	gene	127811974	127824020	-	3	ensembl	protein_coding	5.54546	5.43937	5.41655	4.37572	4.47776	5.43378	5.69548	5.73256	5.51525	5.8275	5.55504	5.75917	5.39188	5.40482	4.49608	4.54731	5.42177	5.66803	5.72888	5.48645
Smu1	5	gene	61576564	61595134	-	3	ensembl	protein_coding	4.78017	4.98328	4.85805	3.71173	3.93322	4.93054	4.98574	4.91385	4.78646	5.09271	4.79794	5.01023	4.95006	4.84452	3.82389	4.01148	4.94302	4.94697	4.87933	4.76831
Pgap3	10	gene	86138993	86150849	-	1	ensembl	protein_coding	3.30545	3.36461	3.45314	2.26416	2.34628	3.13797	3.70455	3.67965	3.50936	3.52126	3.26725	3.44056	3.32506	3.47377	2.39188	2.41503	3.10092	3.70369	3.66927	3.49899
Olr1344	9	gene	99331868	99332803	-	1	ensembl	protein_coding	-4.6676	-6.78128	-6.78128	-6.78128	-6.78128	-6.78128	-6.78128	-3.79909	-6.78128	-6.78128	-4.53706	-6.8166	-6.8166	-6.8166	-6.8166	-6.8166	-6.8166	-6.8166	-3.64709	-6.8166
Mapk14	20	gene	7968539	8028708	+	7	ensembl	protein_coding	6.18996	6.40677	6.26931	5.2254	5.35546	6.18841	6.55313	6.48522	6.16428	6.32989	6.17835	6.19741	6.40726	6.28028	5.35245	5.45709	6.17014	6.54286	6.4739	6.10809
Commd5	7	gene	118495338	118496759	+	3	ensembl	protein_coding	3.02845	3.18272	3.27302	2.50109	2.23846	3.26016	3.33254	3.24054	3.40046	3.49238	2.99268	3.3438	3.15247	3.34055	2.39134	2.52313	3.33494	3.27174	3.22262	3.37656
Rdh14	6	gene	45868730	45873873	+	2	ensembl	protein_coding	3.72074	3.75323	4.06432	2.49152	3.04183	4.00829	3.90956	4.0891	4.14171	4.3617	3.71169	4.29474	3.68614	4.10335	2.5551	3.16906	4.00601	3.85267	4.06239	4.14085
Rnf167	10	gene	57013969	57018254	+	5	ensembl	protein_coding	5.76279	5.98503	5.79657	4.75216	4.86053	5.93178	5.96504	6.01328	5.91406	6.13462	5.73818	6.04847	5.97951	5.78647	4.8762	4.92144	5.94031	5.91939	5.99809	5.90781
Prrc2a	20	gene	7213149	7226658	-	5	ensembl	protein_coding	8.73186	8.7262	8.77739	7.29766	7.76676	8.83357	9.08429	8.91199	8.83549	8.86562	8.72469	8.74961	8.69456	8.78377	7.37877	7.86537	8.84099	9.08153	8.8937	8.81784
Pkp3	1	gene	220806128	220817136	+	4	ensembl	protein_coding	-0.169208	-0.413104	-0.459458	-1.7362	-1.93979	-0.349806	-0.59836	-0.383291	-0.387317	0.0264473	-0.043315	-0.02418	-0.694826	0.197582	-2.09518	-2.12987	-0.205631	-1.00029	-0.00257487	-0.411797
MGC95210	10	gene	101879212	101890139	+	4	ensembl	protein_coding	2.00223	2.25483	2.04352	1.16631	1.53747	2.3113	2.32528	2.36928	2.14906	2.55973	1.93362	2.38978	2.33557	2.08929	1.27814	1.60593	2.32502	2.29274	2.36422	2.10469
Mir376c	6	gene	143034796	143034879	+	2	ensembl	miRNA	-6.81374	-6.81374	-6.81374	-6.81374	-6.81374	-6.81374	-6.81374	-6.81374	-6.81374	-6.81374	-6.81374	-6.81374	-6.81374	-6.81374	-6.81374	-6.81374	-6.81374	-6.81374	-6.81374	-6.81374
Git1	10	gene	62352883	62362209	-	6	ensembl	protein_coding	8.9263	8.89616	8.83978	7.66389	7.84831	9.0476	9.35545	9.08786	8.99838	9.20557	8.91657	9.13056	8.84216	8.8284	7.77239	7.91866	9.05078	9.36027	9.05955	8.98994
Clec4d	4	gene	223270168	223282584	+	6	ensembl	protein_coding	-6.60481	-6.60481	-6.60481	-6.60481	-6.60481	-6.60481	-4.3249	-6.60481	-4.28174	-6.60481	-6.96387	-6.96387	-3.81292	-6.96387	-6.96387	-6.96387	-6.96387	-4.87232	-6.96387	-4.01275
Vom2r53	7	gene	13338374	13383012	+	3	ensembl	protein_coding	-5.97155	-5.97155	-5.97155	-5.97155	-5.97155	-5.97155	-5.97155	-5.97155	-5.97155	-5.97155	-4.34566	-5.52552	-7.38968	-5.40912	-7.38968	-5.35843	-4.76067	-7.38968	-4.75738	-7.38968
Caap1	5	gene	117425195	117477566	-	5	ensembl	protein_coding	2.0072	2.3562	2.22153	0.795384	1.15777	2.3708	2.20634	2.03856	2.01065	2.12598	1.96579	1.99236	2.28579	2.22972	0.953547	1.33449	2.45746	2.16537	2.01298	1.89289
Fam13a	4	gene	154006120	154102125	-	6	ensembl	protein_coding	2.7699	2.9878	2.75605	1.50991	1.67863	3.11562	2.88469	2.80781	2.81086	2.9025	2.77593	2.78724	2.97746	2.7916	1.6089	1.72739	3.15914	2.81685	2.76181	2.81746
Ankrd16	17	gene	72090953	72102223	-	5	ensembl	protein_coding	2.20741	2.14297	2.22554	1.01713	1.28723	2.12073	2.3551	2.39038	2.52115	2.40023	2.20989	2.30142	2.07077	2.22094	1.05858	1.40869	2.14778	2.30352	2.36323	2.58305
Faim	8	gene	106250734	106261613	+	4	ensembl	protein_coding	2.73605	2.94429	2.92054	1.62262	2.07534	3.03498	2.92326	3.05316	2.92797	3.3386	2.6002	3.46063	2.88788	2.90866	1.64131	2.303	3.01109	2.90579	2.96155	2.89671
Zfp444	1	gene	72775799	72793062	-	6	ensembl	protein_coding	4.51798	4.35499	4.66602	3.15003	3.68511	4.80874	5.02024	4.91967	4.82767	4.9369	4.49503	4.86648	4.3044	4.66244	3.21614	3.81818	4.81448	5.0018	4.88816	4.82025
Acss3	7	gene	49087351	49265391	-	6	ensembl	protein_coding	0.196751	-0.138267	-0.159248	-1.30984	-0.863149	0.694944	0.420987	-0.505683	0.159863	0.349625	0.236075	0.309972	-0.0520238	-0.0572538	-1.26815	-0.755693	0.76525	0.33185	-0.747006	0.0829622
Rrp15	13	gene	109807390	109830733	-	6	ensembl	protein_coding	3.36656	3.63106	3.58243	2.35864	2.85049	3.81043	3.54785	3.74321	3.53317	3.83969	3.32839	3.76653	3.59538	3.56739	2.41812	3.04988	3.84825	3.46799	3.70804	3.51357
Spryd3	7	gene	141517639	141534847	-	6	ensembl	protein_coding	8.28127	8.33216	8.14101	7.14276	7.14354	7.99814	8.3445	8.42437	8.32406	8.45495	8.29358	8.36262	8.32184	8.13573	7.26638	7.20975	7.95681	8.30918	8.41106	8.31982
Actr5	3	gene	160477100	160490585	-	5	ensembl	protein_coding	2.58386	2.35608	2.57353	1.51289	1.45612	2.51403	2.67439	2.80521	2.82864	2.73973	2.58926	2.63844	2.31725	2.67716	1.59515	1.49747	2.48389	2.64541	2.77642	2.82402
Olr318	1	gene	235328700	235329656	-	1	ensembl	protein_coding	-6.09659	-6.09659	-6.09659	-6.09659	-3.7572	-6.09659	-6.09659	-6.09659	-6.09659	-6.09659	-7.35627	-5.38536	-7.35627	-4.03109	-5.18079	-3.96964	-5.32728	-7.35627	-7.35627	-5.30727
Pgpep1	16	gene	20379057	20388077	+	5	ensembl	protein_coding	2.94056	3.07879	3.11585	1.41151	2.00446	3.14984	3.5223	3.18281	2.96206	3.10153	2.95989	2.97016	3.00945	3.13493	1.44191	2.13514	3.1756	3.57359	3.11036	2.95868
Dgat2l6	X	gene	71226312	71250393	+	3	ensembl_havana	protein_coding	-6.78628	-4.40731	-6.78628	-6.78628	-6.78628	-6.78628	-6.78628	-4.5998	-6.78628	-6.78628	-6.81488	-6.81488	-4.28161	-6.81488	-6.81488	-6.81488	-6.81488	-6.81488	-4.49674	-6.81488
Eln	12	gene	26978753	27022484	+	7	ensembl	protein_coding	2.48288	2.24543	2.24505	0.720915	1.16223	2.12874	1.91322	2.47519	1.69607	2.44133	2.52708	2.31669	2.22769	2.17984	0.776428	1.25131	2.10709	1.85582	2.54658	1.72256
Vapb	3	gene	177890671	177927965	+	3	ensembl	protein_coding	5.65209	5.48802	5.50699	4.46102	4.66818	5.42378	5.67259	5.52353	5.55431	5.80837	5.55826	5.714	5.65203	5.47596	4.71753	4.59931	5.44526	5.56091	5.56138	5.47423
Cyp2b1	7	gene	99752125	99775779	+	4	ensembl	protein_coding	-3.83723	-6.01907	-6.01907	-6.01907	-6.01907	-6.01907	-6.01907	-6.01907	-3.76277	-3.77364	-3.63334	-5.36764	-7.51688	-3.89084	-7.51688	-4.34241	-5.30431	-5.35146	-5.3009	-5.28249
St8sia5	18	gene	73242668	73302825	+	3	ensembl	protein_coding	4.06055	3.54653	3.96043	2.71376	2.69213	3.83418	4.20266	4.07104	4.28862	4.32351	4.09339	4.24169	3.43703	3.97483	2.90177	2.7274	3.83517	4.1575	4.0304	4.29423
Dpyd	2	gene	240215937	240744042	+	6	ensembl	protein_coding	3.30117	3.67749	3.1596	2.0671	1.94207	3.26274	2.95838	3.34157	3.30954	3.1362	3.3642	3.09434	3.78422	3.04176	2.23964	2.01809	3.21532	2.90238	3.29025	3.20567
Gpr173	X	gene	64162930	64164050	+	7	ensembl_havana	processed_transcript	1.56665	1.63636	1.78425	0.438208	0.756927	1.36903	1.88792	1.91611	1.36852	1.67087	1.61658	1.51918	1.63155	1.77235	0.537471	0.847674	1.34682	1.86542	1.92192	1.33589
Fbxl13	4	gene	10021508	10177069	+	2	ensembl	protein_coding	-2.99316	-1.4244	-1.27776	-2.52887	-2.72652	-1.47675	-1.16356	-0.934645	-1.0224	-1.82627	-4.21997	-2.04863	-1.34125	-1.34599	-1.78442	-2.06193	-1.16072	-1.34675	-0.930422	-1.13425
Ranbp6	1	gene	255232607	255235924	-	5	ensembl	protein_coding	4.05794	4.14573	4.01398	2.78684	3.08792	4.32506	4.04862	4.1194	3.97726	4.3422	4.10766	4.21472	4.0725	3.91958	2.89818	3.08009	4.42014	4.11284	4.05889	4.02036
Olr88	1	gene	174585043	174585993	+	1	ensembl	protein_coding	-6.70303	-6.70303	-6.70303	-6.70303	-6.70303	-6.70303	-6.70303	-6.70303	-6.70303	-6.70303	-6.88944	-5.02528	-6.88944	-6.88944	-6.88944	-6.88944	-6.88944	-6.88944	-6.88944	-6.88944
Vps37a	16	gene	54564705	54602075	-	5	ensembl	protein_coding	2.35722	2.37951	2.31431	1.03825	1.38874	2.54687	2.44711	2.46537	2.34357	2.32141	2.30431	2.21611	2.36786	2.36105	1.11442	1.53803	2.57227	2.4159	2.42997	2.28244
Mastl	17	gene	91504460	91539143	+	5	ensembl	protein_coding	-1.74154	-5.75599	-1.85356	-3.82378	-2.59184	-0.968013	-1.21007	-1.65643	-2.95422	-1.67179	-2.09945	-2.14754	-4.25027	-1.80463	-2.92414	-3.31091	-0.796304	-1.10023	-1.90051	-3.89326
Ifi27	6	gene	136548421	136554959	+	7	ensembl	protein_coding	6.86981	6.8609	6.60865	5.33743	5.03554	7.12945	7.36078	7.0995	6.97564	7.48536	6.88967	7.43303	6.81455	6.58072	5.44106	5.01243	7.15854	7.37458	7.09171	6.96678
Socs1	10	gene	3782936	3783574	+	2	ensembl	protein_coding	0.0499421	-0.021712	0.868966	-0.707812	-0.836873	0.66389	0.731006	1.23685	1.25417	1.08586	0.0491962	0.990819	-0.153697	0.952113	-0.817195	-0.682702	0.721048	0.820233	1.16849	1.27598
Zfp292	5	gene	54851038	54931298	-	3	ensembl	protein_coding	3.74454	3.90738	3.85044	2.55078	3.16466	4.17697	3.72867	3.82512	3.83464	4.12069	3.71959	4.03611	3.87234	3.83692	2.67458	3.31012	4.23309	3.63143	3.7781	3.81161
Abo	3	gene	9729919	9749616	-	1	ensembl	protein_coding	2.09419	2.18038	2.19817	0.953578	1.02429	2.16125	2.05988	2.14897	2.08351	2.29133	2.09743	2.21103	2.13661	2.24854	1.06613	1.11886	2.17084	2.03012	2	2.11599
Olr598	3	gene	82767324	82768256	+	1	ensembl	protein_coding	-6.57801	-6.57801	-6.57801	-6.57801	-6.57801	-6.57801	-6.57801	-6.57801	-6.57801	-6.57801	-6.97494	-6.97494	-6.97494	-6.97494	-6.97494	-4.94368	-6.97494	-6.97494	-6.97494	-5.03692
Yrdc	5	gene	146615909	146620749	+	3	ensembl	protein_coding	3.59591	3.57443	3.80918	2.4547	2.68886	3.71848	3.75518	3.76634	3.65659	4.02703	3.57885	3.994	3.52795	3.80886	2.55348	2.78524	3.71056	3.72188	3.72324	3.64263
RatNP-3b	16	gene	74952566	75131342	-	2	ensembl	protein_coding	-3.94894	-3.29313	-4.2706	-6.38694	-4.17855	-4.11762	-5.49847	-4.94864	-4.95226	-4.59971	-1.84324	-4.92796	-4.92796	-4.92796	-4.92796	-4.92796	-4.92796	-4.92796	-4.92796	-4.92796
Il17rc	4	gene	208724712	208737142	+	5	ensembl	protein_coding	0.992636	0.914865	0.989927	-0.372239	-0.155812	1.41608	1.31636	1.12851	1.14661	1.45822	1.03952	1.35847	0.706402	0.997453	-0.240233	-0.0943401	1.40741	1.32249	1.13319	1.2048
Prom1	14	gene	71563324	71668091	+	6	ensembl	protein_coding	2.4638	2.95683	2.0513	1.35845	1.09728	2.7107	2.53475	2.77818	2.35913	2.65473	2.55299	2.4606	2.90203	2.11738	1.29917	1.38616	2.80812	2.54121	2.58707	2.31041
Pgk2	9	gene	22956349	22957913	+	4	ensembl	protein_coding	-3.20361	-3.20361	-3.20361	-3.20361	-3.20361	-3.20361	-3.20361	-3.20361	-3.20361	-3.20361	-2.84777	-2.58312	-2.78981	-2.76168	-4.24669	-3.85129	-3.50193	-3.40246	-3.2133	-2.83803
Neto1	18	gene	82532693	82645708	+	4	ensembl	protein_coding	7.01775	6.74553	6.76957	5.3818	5.69613	6.82253	6.54651	6.65468	6.96012	7.11625	7.06657	7.03794	6.69315	6.78778	5.48974	5.77742	6.83512	6.44964	6.59226	6.98124
Fam32a	16	gene	19164840	19169329	-	3	ensembl	protein_coding	6.4895	6.6327	6.52217	5.47154	5.59704	6.60497	6.70832	6.59877	6.54932	6.9037	6.46846	6.85138	6.58425	6.52052	5.60891	5.66328	6.61885	6.69165	6.55444	6.51629
Ttc9c	1	gene	231942033	231952730	-	4	ensembl	protein_coding	4.59251	4.82919	4.46505	3.42321	3.63115	4.64269	4.65629	4.61021	4.63388	4.78719	4.58771	4.69081	4.82861	4.44807	3.61343	3.68324	4.66117	4.59019	4.58937	4.57875
Chdh	16	gene	6009402	6042912	+	5	ensembl	protein_coding	1.56111	1.11937	1.78104	0.350129	0.281546	1.73795	1.89801	1.59054	1.63381	1.71034	1.56795	1.63542	1.05787	1.81815	0.43721	0.310669	1.79836	1.82043	1.57936	1.63842
Selplg	12	gene	50359789	50361080	+	5	ensembl	protein_coding	5.08769	4.85659	5.67146	4.01938	3.64593	5.44105	5.50546	5.26534	5.31119	5.41484	5.05517	5.31534	4.76064	5.76251	4.16549	3.68711	5.46189	5.47635	5.22173	5.3127
Fam221b	5	gene	63680873	63689832	-	5	ensembl	protein_coding	-4.06733	-6.22285	-3.96894	-3.33479	-6.22285	-4.04002	-6.22285	-3.9906	-6.22285	-4.00451	-3.3524	-4.29042	-3.98362	-7.29796	-3.51063	-7.29796	-5.05005	-4.27201	-4.21464	-5.02788
Ppp1r15b	13	gene	55001947	55009303	+	5	ensembl	protein_coding	4.7096	4.94668	4.58149	3.51714	3.74435	4.8783	4.91946	4.88265	4.49721	4.83286	4.7155	4.72536	4.93731	4.54524	3.67103	3.78074	4.99538	4.89213	4.82836	4.41871
Rasgef1c	10	gene	35164536	35230687	+	6	ensembl	protein_coding	0.404599	0.85563	1.33841	-0.03622	0.184828	1.17698	1.0107	0.781519	1.4528	1.35249	0.292234	1.23873	0.942242	1.3398	0.197827	0.299521	1.24142	0.909819	0.660529	1.39962
Ddx24	6	gene	136522732	136539893	-	3	ensembl	protein_coding	6.90699	7.00533	6.76757	5.81229	5.75815	6.78873	7.03928	7.00114	6.89865	7.10216	6.93001	7.01143	6.99376	6.74083	5.95882	5.80465	6.79293	7.00524	6.96982	6.87281
Smarcb1	20	gene	15836278	15858383	+	5	ensembl	protein_coding	6.10409	6.28447	6.23426	5.27155	5.27159	6.16813	6.36927	6.45419	6.2789	6.50613	6.08767	6.43947	6.25247	6.23265	5.39948	5.31822	6.13642	6.37021	6.44435	6.26162
Mrpl20	5	gene	176723859	176728389	+	5	ensembl	protein_coding	5.08133	5.16034	4.90427	3.89754	4.04915	4.94166	5.03216	5.14473	5.07677	5.3553	5.08254	5.27693	5.15649	4.91118	4.03311	4.10874	4.9252	4.99007	5.10606	5.05294
Cct8l1	4	gene	6066975	6068660	-	1	ensembl	protein_coding	-3.07345	-3.55945	-3.72069	-3.13597	-3.83314	-1.97559	-1.97026	-1.92133	-2.53207	-5.79891	-3.49444	-3.54073	-2.82285	-3.01171	-3.67552	-5.28694	-1.87047	-2.44212	-2.82168	-2.55437
Cox8b	1	gene	220574321	220575819	-	3	ensembl	protein_coding	-1.37935	-1.76371	-3.04621	-6.54259	-3.67472	-2.48333	-1.87117	-1.40156	-1.99565	-1.30378	-1.24236	-1.28589	-1.71013	-3.06035	-6.85668	-3.53312	-2.44449	-1.84321	-1.32407	-2.16175
Amotl2	8	gene	110604450	110619840	+	6	ensembl	protein_coding	4.0932	4.25695	4.24123	2.93751	3.18809	4.50394	4.48592	4.38837	4.20421	4.49404	4.07497	4.42492	4.2056	4.25803	3.02592	3.26036	4.55638	4.45215	4.36191	4.17322
Tmem79	2	gene	207104465	207109243	-	3	ensembl	protein_coding	0.313191	0.106799	0.316691	-0.971824	-0.408908	-0.177121	0.0270769	-0.119152	-0.17763	-0.135419	0.396584	-0.309608	0.0605498	0.373433	-0.746799	-0.233695	-0.344358	-0.120135	-0.277294	-0.0249746
Txnrd2	11	gene	89762307	89809957	-	6	ensembl	protein_coding	4.03486	3.7628	3.69031	2.74476	2.7605	3.90398	3.96854	3.96562	3.99924	4.25461	4.03647	4.17566	3.62481	3.6866	2.86239	2.83622	3.90719	3.98505	3.97103	3.99979
Fras1	14	gene	14413367	14794704	-	6	ensembl	protein_coding	0.546579	0.843557	1.27916	0.0616256	0.17387	1.71182	2.05579	1.01038	0.684433	1.08575	0.251485	0.686765	0.80562	1.20168	0.396562	0.46346	1.8852	2.11288	0.885383	0.763932
Ch25h	1	gene	260029123	260030019	-	2	ensembl	protein_coding	0.197855	0.217273	-0.137214	-1.21702	-1.68891	-0.0684374	0.710862	0.433232	0.463232	1.0743	0.2018	0.914544	0.228252	-0.25407	-1.11753	-1.58828	-0.0519399	0.79453	0.416374	0.441485
Slc4a1ap	6	gene	36035092	36064887	-	6	ensembl	protein_coding	4.72646	4.61818	4.59642	3.52206	3.70912	4.74263	4.68652	4.62079	4.73187	5.03451	4.71581	4.97227	4.52825	4.60739	3.64854	3.79005	4.79182	4.6463	4.55318	4.73494
Ccdc65	X	gene	114893623	114907348	+	4	ensembl	protein_coding	3.53239	3.64692	3.65972	2.55499	2.65311	3.72565	3.73822	3.75592	3.47062	4.02528	3.49824	3.98682	3.59849	3.67485	2.67768	2.7563	3.74543	3.67878	3.71051	3.43571
Ctsb	15	gene	50081535	50102406	+	5	ensembl	protein_coding	8.94637	8.90858	8.93345	7.82027	7.71807	9.07988	9.23893	8.95802	8.92673	9.21927	8.94889	9.13871	8.86436	8.94079	7.95615	7.75708	9.10778	9.22847	8.90852	8.89881
Tjp2	1	gene	249224596	249358699	-	6	ensembl	protein_coding	4.46651	4.94876	4.92364	3.63821	3.7586	5.28856	5.06278	4.83575	4.89429	5.11142	4.37416	5.02634	4.91424	4.95333	3.77684	3.83279	5.36493	5.04132	4.77814	4.86641
Prl4a1	17	gene	40569969	40577892	-	5	ensembl	protein_coding	-6.40581	-6.40581	-6.40581	-6.40581	-6.40581	-6.40581	-6.40581	-6.40581	-6.40581	-6.40581	-7.09271	-4.08251	-7.09271	-5.11214	-7.09271	-7.09271	-7.09271	-5.21451	-7.09271	-7.09271
Iba57	10	gene	45262185	45270970	-	4	ensembl	protein_coding	2.90571	2.74801	2.87775	2.08226	1.712	3.03185	3.1199	3.12192	3.00452	2.91615	2.95183	2.88446	2.81868	2.88624	2.08214	1.82769	3.0338	3.16792	3.02513	2.84218
Nup155	2	gene	77213963	77265544	+	5	ensembl	protein_coding	3.95668	4.25834	3.97019	2.94109	2.85028	3.91351	4.1164	4.05616	3.81234	3.94353	3.97833	3.81252	4.29236	3.96694	3.07654	2.91274	3.91867	4.08567	4.01489	3.75984
Camkk2	12	gene	41155843	41191356	+	5	ensembl	protein_coding	6.47176	6.407	6.29447	5.09369	5.23703	6.47371	6.56555	6.53793	6.71412	6.68758	6.4798	6.57847	6.38873	6.2845	5.18789	5.28591	6.49204	6.51916	6.50808	6.75826
Fbn2	18	gene	52284517	52414950	-	2	ensembl	protein_coding	-1.50136	-1.21415	-1.24026	-2.97096	-5.51601	-2.44083	-1.46698	-1.00073	-1.42294	-1.6138	-1.73964	-2.88581	-1.10651	-1.72144	-2.80746	-2.34868	-2.55124	-1.90975	-1.00834	-2.30913
Aif1	20	gene	7234609	7239707	-	6	ensembl_havana	protein_coding	3.31759	3.38873	3.54553	2.00664	2.16414	3.92178	3.64725	3.31971	3.77193	4.07548	3.29876	4.03551	3.31467	3.62298	2.09578	2.18131	3.9751	3.63795	3.22985	3.76687
Iqcf5	8	gene	114577756	114579141	+	4	ensembl	protein_coding	-6.58467	-6.58467	-6.58467	-6.58467	-6.58467	-6.58467	-6.58467	-6.58467	-6.58467	-6.58467	-6.97039	-6.97039	-6.97039	-6.97039	-6.97039	-6.97039	-5.05129	-6.97039	-6.97039	-5.03236
Msmo1	16	gene	26738367	26754806	+	1	ensembl	protein_coding	6.01464	6.13485	5.99715	5.04152	5.07345	5.98498	5.90626	6.00355	5.99402	6.24148	6.03427	6.16467	6.12894	5.9991	5.19036	5.14828	5.98668	5.81676	5.95015	5.9727
Sptbn1	14	gene	114188059	114356233	-	6	ensembl	protein_coding	9.38587	9.57764	9.35259	8.19591	8.36613	9.60578	9.57739	9.44349	9.37795	9.43059	9.38402	9.30228	9.57249	9.35472	8.31215	8.43927	9.65111	9.54696	9.40232	9.348
Fam110b	5	gene	23688479	23690112	+	4	ensembl	protein_coding	5.34408	5.19148	5.11657	4.09391	4.05656	5.10181	5.34001	5.31661	5.22208	5.5053	5.37248	5.43223	5.15495	5.11496	4.2391	4.09558	5.08039	5.30745	5.28383	5.20744
Cenpc	14	gene	23515343	23571971	+	4	ensembl	protein_coding	2.24555	2.48883	2.21712	0.740906	1.33707	2.35779	2.01027	1.9815	2.33277	2.54598	2.27313	2.44711	2.49931	2.25343	0.818183	1.51715	2.35727	1.91283	1.9006	2.27878
Slco1c1	4	gene	239951726	239997943	+	4	ensembl	protein_coding	5.37252	5.46277	4.85006	3.9628	3.77157	5.04018	5.07837	5.04307	4.80373	5.28123	5.4261	5.19134	5.5053	4.81872	4.12263	3.8306	5.03287	5.01351	4.99347	4.73176
Olr39	1	gene	173773514	173774503	-	2	ensembl	protein_coding	-5.84985	-5.84985	-2.94997	-3.86794	-5.84985	-5.84985	-3.78019	-2.14585	-5.84985	-5.84985	-3.98796	-5.49353	-7.8723	-3.859	-4.32166	-4.35879	-5.42343	-3.59673	-3.53036	-5.39928
Myh6	15	gene	37492599	37516191	-	1	ensembl	protein_coding	2.25435	2.22027	2.71904	0.114298	1.24501	2.88359	2.80721	2.31944	2.243	2.6246	2.14133	2.432	2.11541	2.83679	0.731158	1.28278	2.76055	2.74353	2.21824	2.16901
Pde6b	14	gene	2327104	2370811	-	5	ensembl	protein_coding	-3.17527	-1.78365	-1.97605	-3.23904	-3.9501	-3.14664	-2.66803	-3.85578	-3.09831	-3.86886	-3.02279	-4.38569	-2.19792	-2.38196	-2.49661	-3.56582	-2.98268	-3.04606	-2.97812	-3.70409
Btbd16	1	gene	208368884	208423112	+	3	ensembl	protein_coding	1.10817	2.02018	1.77019	0.734056	0.88713	0.922754	1.76282	1.83056	1.44163	0.766524	1.05207	0.623532	2.00095	1.79032	0.919321	0.991936	0.874062	1.80298	1.85754	1.33131
Zmynd15	10	gene	56821719	56828333	+	6	ensembl	protein_coding	-0.501728	-1.08773	-0.444987	-1.89086	-3.56541	-0.970596	0.450383	0.0836591	-1.31985	-0.928248	-0.0549785	-0.869119	-1.06337	-0.692247	-2.58202	-3.0214	-0.980712	0.539298	0.144873	-1.59569
Krt77	7	gene	141259822	141271225	-	2	ensembl	protein_coding	-2.85821	-1.74779	-3.5148	-3.66352	-2.88283	-5.62306	-5.62306	-2.30558	-5.62306	-3.54807	-3.16371	-4.81555	-1.90762	-3.63781	-5.47999	-3.2249	-3.39835	-5.71382	-2.67935	-3.36887
Polr3c	2	gene	218323219	218339095	-	4	ensembl	protein_coding	4.14019	4.3946	4.25816	3.2156	3.33521	4.14971	4.35998	4.25276	4.22169	4.60616	4.10422	4.56103	4.39405	4.26102	3.35349	3.42223	4.13147	4.31626	4.219	4.17131
Rinl	1	gene	88153376	88164438	+	3	ensembl	protein_coding	-0.619318	-0.364138	-0.33204	-1.52961	-1.6457	-0.50109	-0.697182	-0.465221	-0.265218	-0.302828	-1.78832	-0.726602	-0.404386	0.265372	-0.667131	-1.23607	0.0716736	-0.230983	-1.38141	-0.624496
Nipal4	10	gene	31060605	31077316	-	5	ensembl	protein_coding	2.89626	3.23617	3.28802	2.38153	2.39992	3.25265	3.2007	3.11846	3.46168	3.57598	2.8227	3.52671	3.19716	3.2882	2.56232	2.46939	3.24067	3.14528	3.09086	3.4681
Cep97	11	gene	50327805	50355273	+	6	ensembl	protein_coding	3.10844	3.32158	3.06155	1.83396	2.20732	3.44636	3.1622	2.95805	3.01466	3.131	3.12036	3.01415	3.32934	3.05904	1.93309	2.28713	3.5155	3.09636	2.89152	2.99863
Atf2	3	gene	67199878	67274694	-	7	ensembl	protein_coding	4.81774	4.89353	4.72948	3.59338	3.70566	4.89858	4.90738	4.73715	4.76036	4.94973	4.83718	4.8642	4.86018	4.72259	3.7215	3.75947	4.90703	4.87521	4.69023	4.7554
Tmem176b	4	gene	143138374	143145816	-	5	ensembl	protein_coding	4.26406	4.30082	4.85504	3.01032	3.15599	4.80808	5.29625	4.4993	4.96964	5.27472	4.19268	5.13739	4.19976	4.95479	3.138	3.25428	4.91209	5.2495	4.432	4.96372
Asb3	14	gene	115009338	115105125	+	4	ensembl	protein_coding	2.83907	3.04852	2.45805	1.56026	1.5133	2.82418	2.74897	2.74924	2.62647	2.7917	2.87234	2.662	3.05185	2.4259	1.7076	1.59031	2.8841	2.74114	2.72198	2.50254
Elac1	18	gene	68851118	68868465	-	5	ensembl	protein_coding	2.80381	3.19949	2.4907	1.66751	1.97297	3.02631	2.99113	2.8543	2.59204	2.99622	2.93166	2.91437	3.03443	2.49299	1.7314	1.99843	3.15687	3.05317	2.74213	2.53903
Fam110c	6	gene	58647800	58654055	+	4	ensembl	protein_coding	-1.0635	-0.730997	-0.219176	-1.61357	-1.25212	-0.799489	-0.633784	-0.578682	-1.44738	-1.14507	-0.902925	-0.781712	-1.00817	-0.211825	-1.06748	-1.35453	-1.81304	-0.92459	-0.184083	-1.23542
Adhfe1	5	gene	14202076	14228623	-	5	ensembl	protein_coding	4.85342	4.86087	5.0664	3.83229	3.79172	5.03524	5.25156	5.01203	4.79674	5.41546	4.83619	5.37102	4.79683	5.09846	3.97859	3.82669	5.06397	5.24212	4.96571	4.73614
Ltb4r2	15	gene	38335390	38336466	+	2	ensembl	protein_coding	-5.42402	-5.42402	-5.42402	-5.42402	-5.42402	-3.45099	-2.71987	-3.40632	-3.40919	-3.41889	-5.0452	-3.65985	-5.74501	-4.90899	-4.7897	-4.20048	-3.56731	-4.44787	-3.26619	-3.89477
Pla2g2d	5	gene	160963984	160970152	+	4	ensembl	protein_coding	-2.32896	-2.53383	-2.44773	-3.76103	-6.58525	-2.53037	-2.80788	-2.03947	-0.960103	-4.41594	-1.98695	-6.84138	-2.47581	-2.64429	-3.47729	-4.38557	-3.12475	-2.79045	-1.75494	-0.929141
Slc45a1	5	gene	171300141	171322391	-	6	ensembl	protein_coding	6.43649	6.05075	6.32465	5.211	5.26047	6.19478	6.41686	6.48373	6.41789	6.63805	6.46047	6.56663	5.99069	6.33263	5.3425	5.32234	6.1661	6.36978	6.45943	6.42408
Mfsd6	9	gene	53294987	53378134	+	6	ensembl	protein_coding	6.68969	6.69917	6.55077	5.45187	5.49116	6.59812	6.53709	6.63124	6.55941	6.7774	6.72283	6.68641	6.68801	6.55198	5.58409	5.55707	6.60975	6.46544	6.58358	6.53677
Rbpms2	8	gene	70852852	70883668	+	6	ensembl	protein_coding	1.29778	1.63372	1.59199	0.769391	0.54329	1.41263	2.14777	1.94983	1.40513	1.9057	1.52851	2.0331	1.74901	1.47375	0.766251	0.782465	1.20911	1.89674	1.83072	1.38758
Qser1	3	gene	101330796	101391977	-	2	ensembl	protein_coding	1.88339	2.42648	2.13937	1.06637	0.871177	2.44441	2.22727	1.91095	1.8134	1.94533	1.86788	1.765	2.41309	2.12655	1.31945	0.944379	2.47757	2.21937	1.84425	1.7506
Map2k5	8	gene	67784869	68009803	-	7	ensembl	protein_coding	4.04788	4.29237	4.22312	2.9092	3.31161	4.03719	4.36406	4.3913	4.0754	4.42449	4.05622	4.3712	4.24416	4.13421	3.03625	3.46198	4.07901	4.37355	4.35748	3.96256
Adamts3	14	gene	19773136	19977447	+	5	ensembl	protein_coding	4.41839	4.3891	4.47506	3.18331	3.27815	4.61411	4.55355	4.46698	4.46324	4.67641	4.42557	4.57473	4.34604	4.48037	3.31972	3.31232	4.68367	4.51676	4.40222	4.4569
Marveld3	19	gene	52533502	52548323	+	4	ensembl	protein_coding	-6.04364	-3.52089	-6.04364	-6.04364	-6.04364	-6.04364	-3.77133	-6.04364	-6.04364	-3.73947	-4.04035	-5.35917	-3.40674	-7.4429	-7.4429	-4.36519	-7.4429	-4.05985	-4.50056	-5.27662
Olr671	3	gene	84372723	84373658	-	2	ensembl	protein_coding	-6.65583	-6.65583	-6.65583	-4.56967	-6.65583	-4.48213	-6.65583	-6.65583	-4.43607	-6.65583	-4.69747	-6.92764	-6.92764	-6.92764	-4.50372	-6.92764	-4.66694	-6.92764	-6.92764	-4.64465
Rab36	20	gene	16740316	16755556	-	5	ensembl	protein_coding	3.68891	3.73829	3.728	2.742	2.57383	3.88571	4.05404	3.92191	3.82866	4.22483	3.68019	4.15074	3.64588	3.77312	2.81776	2.67822	3.90293	4.04155	3.88703	3.80877
Plekha8	4	gene	149430315	149480827	+	6	ensembl	protein_coding	3.22548	3.47032	3.0353	2.29908	2.37933	3.44568	3.56423	3.35773	3.1147	3.26644	3.21048	3.14638	3.46561	2.9882	2.42168	2.49624	3.49006	3.55242	3.33873	3.04849
Olr69	1	gene	174317078	174318829	-	5	ensembl	protein_coding	-6.69311	-6.69311	-6.69311	-6.69311	-6.69311	-6.69311	-6.69311	-6.69311	-6.69311	-6.69311	-6.89623	-6.89623	-6.89623	-6.89623	-6.89623	-4.86497	-6.89623	-6.89623	-6.89623	-6.89623
Adpgk	8	gene	63850863	63878782	+	5	ensembl	protein_coding	4.63262	5.05149	5.14446	3.91319	3.76347	5.31293	5.08991	4.96426	5.30016	5.59665	4.56521	5.56163	5.00719	5.2036	4.05503	3.80618	5.34477	5.02679	4.88352	5.31522
Mir181a2	3	gene	28374769	28374885	+	1	ensembl	miRNA	-6.70303	-6.70303	-6.70303	-6.70303	-6.70303	-6.70303	-6.70303	-6.70303	-6.70303	-6.70303	-6.88944	-5.02528	-6.88944	-6.88944	-6.88944	-6.88944	-6.88944	-6.88944	-6.88944	-6.88944
Olr1532	11	gene	46385566	46386483	+	1	ensembl	protein_coding	-4.30478	-6.47566	-6.47566	-6.47566	-6.47566	-4.27728	-6.47566	-3.41276	-6.47566	-6.47566	-4.06982	-7.08696	-7.08696	-7.08696	-7.08696	-7.08696	-4.86004	-4.08927	-4.03243	-4.83808
Gstt4	20	gene	15968193	15975077	+	3	ensembl	protein_coding	-6.47979	-3.94444	-6.47979	-6.47979	-6.47979	-6.47979	-4.19613	-6.47979	-6.47979	-6.47979	-3.68692	-7.07053	-4.73578	-7.07053	-7.07053	-7.07053	-7.07053	-4.19901	-4.93406	-7.07053
Trappc6a	1	gene	81683535	81690450	+	5	ensembl	protein_coding	2.54082	2.53775	2.76574	1.40787	1.58879	3.3609	2.92821	2.86629	3.01393	3.76521	2.5305	3.76031	2.41497	2.79683	1.55601	1.64272	3.44039	2.86563	2.78824	2.9799
Lrrc36	19	gene	48236119	48286469	+	5	ensembl	protein_coding	-0.70693	-0.39718	-0.593851	-1.80803	-1.45451	0.0323401	-0.593351	-0.27508	-0.703541	0.282073	-0.880168	0.0720119	-0.305907	-0.653842	-1.12553	-1.57599	0.1153	-0.904681	-0.31726	-0.641993
Six4	6	gene	105420180	105433841	-	6	ensembl	protein_coding	1.42564	1.51247	1.27475	0.256955	0.274674	1.24712	1.48932	1.21821	1.18332	1.50241	1.68093	1.5501	1.49775	1.13264	0.0205604	0.695779	1.3668	1.40727	0.86786	1.16518
Dync1h1	6	gene	144094996	144159980	+	7	ensembl	protein_coding	9.45012	9.49387	9.45102	8.29896	8.3878	9.52273	9.56741	9.49319	9.45748	9.51163	9.4609	9.39949	9.47068	9.46135	8.4175	8.45658	9.53826	9.53098	9.45486	9.44361
Igf1	7	gene	28528240	28602541	+	7	ensembl	protein_coding	-0.756887	-0.764208	0.0861479	-1.55769	-1.78801	0.624362	0.0866527	-0.535651	-0.418729	0.0450242	-0.576683	-0.0675857	-0.680433	-0.134181	-1.92703	-1.0259	0.474448	0.12135	-0.854276	-0.308694
Kdm1a	5	gene	158674383	158730522	-	5	ensembl	protein_coding	5.27414	5.35018	5.24131	4.27955	4.36855	5.30866	5.33639	5.39309	5.24439	5.50613	5.27062	5.41251	5.35523	5.24618	4.4353	4.40444	5.32654	5.27995	5.3729	5.19873
Stat6	7	gene	71118725	71135848	+	3	ensembl	protein_coding	3.58462	3.64664	3.85235	2.28424	2.63814	4.08721	4.23592	3.82669	4.02899	4.25821	3.52236	4.17979	3.5661	3.84296	2.39134	2.7035	4.15122	4.25837	3.78141	4.04597
Cops4	14	gene	10666123	10696464	-	4	ensembl	protein_coding	6.19268	6.21398	6.07234	5.08444	5.04032	5.97608	6.16482	6.07504	6.0803	6.34131	6.21617	6.26078	6.20689	6.07071	5.24542	5.08891	5.95538	6.11477	6.01505	6.06723
Dyrk2	7	gene	61776788	61789208	-	5	ensembl	protein_coding	4.5593	4.37328	4.05647	3.16214	3.41217	4.51695	4.50679	4.15427	4.11169	4.53703	4.61568	4.42164	4.35598	4.01362	3.26754	3.5498	4.53342	4.4898	4.08934	4.05326
Polr1c	9	gene	16017436	16021548	+	5	ensembl	protein_coding	4.28336	4.65147	4.58279	3.42762	3.44215	4.53075	4.79836	4.75112	4.52108	4.81362	4.2234	4.73545	4.62304	4.59649	3.5929	3.48777	4.53954	4.79184	4.74982	4.46206
Grk6	17	gene	11815973	11830526	-	5	ensembl	protein_coding	4.1102	3.9098	3.95288	2.7063	2.78708	4.05148	4.26609	4.06654	3.99773	4.34965	4.11419	4.18749	3.96465	3.94195	2.78719	2.90851	3.90318	4.2167	4.13489	4.03902
Nr1d1	10	gene	86479868	86486598	-	6	ensembl	protein_coding	5.76256	5.95586	5.88079	4.58152	4.91468	6.05584	6.30668	6.09779	5.86698	6.07685	5.61751	5.91576	6.02694	5.83273	4.74869	5.06237	6.00903	6.45732	6.08838	5.74083
Mir98	X	gene	21867881	21867988	-	2	ensembl	miRNA	-6.81374	-6.81374	-6.81374	-6.81374	-6.81374	-6.81374	-6.81374	-6.81374	-6.81374	-6.81374	-6.81374	-6.81374	-6.81374	-6.81374	-6.81374	-6.81374	-6.81374	-6.81374	-6.81374	-6.81374
RGD1564804	5	gene	142085034	142091328	-	4	ensembl	protein_coding	3.56996	3.69293	3.33417	2.47664	2.52922	3.46375	3.57381	3.48375	3.43624	3.97671	3.59857	3.94656	3.67831	3.31151	2.58839	2.63905	3.48137	3.47879	3.43887	3.37576
Chac2	14	gene	115040363	115047436	-	6	ensembl	protein_coding	1.05766	1.27494	0.728626	-0.194586	0.245703	1.34151	1.31182	1.2133	1.08226	1.76472	1.163	1.77918	1.0886	0.655799	-0.173796	0.138849	1.33188	1.46262	1.31558	1.06424
Rragd	5	gene	52808853	52844544	+	6	ensembl	protein_coding	3.98298	4.38296	4.31834	2.99202	3.57745	4.21052	4.41758	4.33087	4.07554	4.15851	3.9417	4.00567	4.35502	4.33732	3.09411	3.72866	4.22453	4.38875	4.3145	4.05651
Stoml3	2	gene	162400575	162418704	+	7	ensembl_havana	protein_coding	-4.41342	-1.28943	-1.25462	-2.85596	-3.17002	-1.57766	-0.955714	-1.39429	-1.66001	-0.838977	-3.70282	-1.03365	-1.32219	-1.34515	-2.53567	-4.39346	-1.5875	-0.912492	-1.43185	-1.14532
Rac1	12	gene	15133521	15153741	+	5	ensembl	protein_coding	6.63388	6.92964	6.70463	5.51313	5.58191	6.67456	6.92452	6.78082	6.73513	6.91289	6.62223	6.8207	6.94436	6.70274	5.63132	5.6429	6.65783	6.89195	6.74444	6.73263
Khsrp	9	gene	9014580	9023574	+	1	ensembl	protein_coding	5.59814	5.63708	5.7284	4.33621	4.74463	5.68608	5.96866	5.89942	5.80328	5.85187	5.59175	5.72619	5.59873	5.74311	4.40306	4.88419	5.69505	5.96253	5.87818	5.77098
LOC257642	14	gene	46765544	46770614	-	1	ensembl	protein_coding	4.20857	3.83653	4.27582	5.38975	5.61003	4.3576	3.50083	3.89932	4.18592	3.30773	4.84101	6.03184	2.82273	5.69831	5.01635	2.82273	4.86864	4.82504	2.82273	2.82273
Zfp879	10	gene	36097634	36107629	-	2	ensembl	protein_coding	1.14587	1.84599	1.03978	0.502288	0.235767	1.88013	1.79203	1.49421	1.30907	1.57947	1.05699	1.25672	1.6369	1.23036	0.324961	0.457608	2.04238	1.61141	1.42634	1.78094
Ppip5k2	9	gene	110771108	110839567	+	7	ensembl_havana	protein_coding	0.93164	0.80923	0.833329	-0.604895	-0.260106	1.35946	0.947726	0.754963	0.855023	0.738578	0.858865	0.485696	0.927028	0.809373	-0.420614	-0.170444	1.39872	1.02829	0.577991	0.870047
Ptpn5	1	gene	104263143	104320930	-	5	ensembl	protein_coding	6.02132	6.19432	6.46049	5.27981	5.42465	6.42058	6.84612	6.46763	5.77675	6.83999	5.97803	6.79758	6.07444	6.4956	5.37474	5.51971	6.45727	6.8728	6.46028	5.7012
Igsf3	2	gene	223212465	223299218	+	5	ensembl	protein_coding	2.88752	3.91216	3.83993	2.70764	2.80373	3.42054	3.8713	3.8365	3.64118	3.42933	2.80138	3.24353	3.94023	3.86244	2.86489	3.02015	3.3795	3.8717	3.76543	3.60058
Sec14l2	14	gene	85017262	85037193	-	4	ensembl	protein_coding	6.94992	6.90484	6.63702	5.57433	5.72587	6.60324	6.75393	6.83144	6.78475	7.01989	6.98494	6.94318	6.89813	6.62397	5.68905	5.79973	6.57834	6.6998	6.79392	6.77418
Tmem30a	8	gene	86767828	86789807	-	5	ensembl	protein_coding	6.08615	6.1231	6.17123	4.85061	5.20371	6.37004	6.18017	6.10512	6.07737	6.40008	6.07045	6.31406	6.08698	6.19426	4.93938	5.29958	6.42669	6.13992	6.0464	6.04986
H2afv	14	gene	80320991	80339834	-	6	ensembl	protein_coding	4.51802	4.8558	4.73134	4.82349	5.09374	4.41089	4.71834	4.77472	4.69093	4.92704	4.33295	4.95045	4.6788	4.87865	4.89857	4.48253	4.72929	4.89663	4.90912	4.78734
Bin2a	8	gene	27955137	27994017	-	3	ensembl	protein_coding	-3.42785	-3.12146	-2.80254	-4.30223	-6.42984	-4.21295	-2.88006	-2.45355	-2.83153	-4.17688	-2.8236	-2.86376	-3.2165	-2.25322	-4.62211	-6.98446	-4.78119	-3.50972	-2.15437	-3.42999
Unc5c	2	gene	265573556	265919845	+	4	ensembl	protein_coding	4.55037	4.59895	4.23101	3.30752	3.30457	4.51253	4.28242	4.32866	4.30971	4.40601	4.55187	4.05112	4.55545	4.23338	3.4646	3.38316	4.49111	4.37077	4.36199	4.36831
Crim1	6	gene	780568	952528	+	5	ensembl	protein_coding	5.07246	5.02113	5.26048	3.95444	4.57606	5.41858	5.70242	5.31806	5.17449	5.49791	5.04268	5.39876	4.92377	5.28576	4.04633	4.73214	5.44885	5.72709	5.26704	5.12362
Slc6a13	4	gene	220964174	220999991	+	4	ensembl	protein_coding	0.508225	0.719401	1.00521	-0.677411	-1.00079	0.971276	1.1592	1.23294	1.29048	1.51435	0.465932	1.43108	0.720593	0.966921	-0.516021	-0.896263	0.896424	1.14149	1.23309	1.27964
Spata24	18	gene	28159728	28167716	-	7	ensembl	protein_coding	0.708117	1.08904	1.15305	-0.205265	-0.103134	1.40758	1.25481	1.1514	0.764342	1.48675	0.780748	1.4506	0.993068	1.13618	-0.0657034	-0.105996	1.56984	1.20609	0.99888	0.742979
Eci3	17	gene	32517375	32539054	+	3	ensembl	protein_coding	0.618975	1.44308	0.926774	-0.303959	0.405211	1.86262	1.39978	1.19408	1.11696	1.66699	0.777882	1.59264	1.51135	0.918612	-0.0643041	0.341599	1.76811	1.30723	1.22795	0.94944
Dynlrb1	3	gene	157129655	157150710	+	5	ensembl	protein_coding	6.91591	7.20957	6.85171	6.04309	6.10842	6.80329	7.17696	7.14892	7.12951	7.38732	6.89509	7.32627	7.20487	6.81006	6.2036	6.15526	6.79143	7.14194	7.123	7.12319
Jam2	11	gene	27864806	27913271	+	2	ensembl	protein_coding	4.6559	4.83035	4.72551	3.55423	3.66175	5.12773	4.9801	4.73512	4.60012	5.01929	4.66099	4.92386	4.8256	4.73019	3.69059	3.70809	5.19651	4.94818	4.67165	4.53446
Rfx3	1	gene	253103266	253254214	-	6	ensembl	protein_coding	2.32264	3.46346	3.54276	2.14531	2.97403	3.05865	3.5354	3.29734	2.82708	2.46585	2.40136	2.38947	3.43482	3.56198	2.27341	3.10274	3.06097	3.44392	3.22656	2.73729
Wdr33	18	gene	24302098	24403929	+	6	ensembl	protein_coding	4.92433	5.15146	4.98227	3.68105	4.01211	5.1351	5.09159	5.14284	4.98928	5.17068	4.89475	5.05352	5.15347	4.97911	3.78843	4.11127	5.15018	5.05821	5.12465	4.96712
Kctd13	1	gene	205341000	205359303	+	4	ensembl	protein_coding	6.96398	6.95428	7.02887	5.83111	5.85407	6.71448	7.17803	7.11721	7.13961	7.12203	6.96642	7.02137	6.91978	7.0487	5.96407	5.91519	6.67348	7.15043	7.09629	7.14794
Olr889	7	gene	4172534	4173496	-	1	ensembl	protein_coding	-6.57427	-6.57427	-4.20909	-6.57427	-6.57427	-6.57427	-6.57427	-6.57427	-6.57427	-6.57427	-7.00297	-7.00297	-4.68161	-4.81408	-7.00297	-7.00297	-7.00297	-7.00297	-7.00297	-4.8611
Olr1397	10	gene	34499895	34500827	+	1	ensembl	protein_coding	-6.69612	-6.69612	-6.69612	-6.69612	-6.69612	-6.69612	-6.69612	-6.69612	-6.69612	-6.69612	-6.89417	-6.89417	-6.89417	-4.91361	-6.89417	-6.89417	-6.89417	-6.89417	-6.89417	-6.89417
Snf8	10	gene	83661391	83673470	+	5	ensembl	protein_coding	5.78168	5.71468	5.6148	4.61634	4.58745	5.6645	5.78795	5.78491	5.71546	6.08724	5.79535	6.06125	5.65441	5.62306	4.72266	4.66226	5.63105	5.73966	5.75593	5.70939
Bcl6	11	gene	80454014	80477192	-	5	ensembl	protein_coding	4.01707	4.67913	4.41933	3.25024	3.88663	5.17689	5.37616	5.07615	4.01619	4.91792	3.95024	4.81143	4.64071	4.37369	3.39002	4.0253	5.24786	5.41055	5.07762	3.88829
Cubn	17	gene	82205509	82425565	-	3	ensembl	protein_coding	-0.105942	-0.559336	-0.245665	-1.79183	-3.78775	0.912562	-0.0127167	-0.678774	0.283333	0.127818	-0.124716	-0.220369	-0.984093	-0.289726	-1.95622	-2.90747	0.740671	-0.103522	-0.443078	0.430217
Lce1m	2	gene	211534988	211536190	+	3	ensembl	protein_coding	-6.12949	-6.12949	-3.7276	-6.12949	-6.12949	-6.12949	-6.12949	-6.12949	-6.12949	-3.7655	-5.28914	-4.07446	-5.06378	-5.19412	-7.34785	-3.86458	-3.65152	-7.34785	-7.34785	-7.34785
Otud5	X	gene	16252448	16284933	-	7	ensembl	protein_coding	6.72661	6.85764	6.76802	5.65555	5.88339	6.67602	6.95771	6.93787	6.83651	7.03522	6.70784	6.93641	6.80186	6.78599	5.75746	5.98086	6.6691	6.93037	6.92695	6.83771
Ust5r	1	gene	231267925	231477585	-	1	ensembl	protein_coding	-5.99842	-5.99842	-5.99842	-5.99842	-5.99842	-3.59082	-5.99842	-5.99842	-5.99842	-5.99842	-4.68943	-5.46389	-7.42567	-7.42567	-7.42567	-7.42567	-4.65899	-4.70706	-4.18698	-4.16752
Vti1a	1	gene	283705427	283882015	+	3	ensembl	protein_coding	3.11307	3.2228	3.12734	1.94792	2.03426	3.23807	3.24372	3.24328	3.07354	3.2047	3.18736	3.05396	3.24665	3.01506	2.05949	2.25792	3.20459	3.2249	3.17013	3.02864
Timp4	4	gene	210445694	210452213	-	3	ensembl	protein_coding	3.89253	4.0709	3.85247	2.78516	2.76255	3.54427	3.93076	3.85337	3.57901	3.97876	3.91904	3.86855	4.11157	3.88192	2.94026	2.82897	3.50335	3.88449	3.81505	3.49657
Asah2	1	gene	257793172	257864321	-	4	ensembl	protein_coding	1.72496	1.74386	1.50802	-0.0478917	0.644556	1.50786	1.60725	1.49977	1.96321	1.9624	1.73976	1.86617	1.72572	1.48034	0.0778017	0.746116	1.4785	1.58828	1.42644	1.98485
Baz1b	12	gene	26476185	26534154	-	6	ensembl	protein_coding	6.52955	7.03119	6.84161	5.5599	5.9753	6.81304	7.08046	6.99775	6.72252	6.81874	6.48074	6.68312	7.03661	6.85742	5.66368	6.09516	6.82028	7.06836	6.98896	6.67575
Pgap2	1	gene	173497659	173523349	+	6	ensembl_havana	protein_coding	3.6817	3.75078	3.97335	2.68214	2.81071	3.70709	4.08492	3.92922	3.89371	4.17872	3.66008	4.09796	3.75368	3.96131	2.77448	2.89053	3.69788	4.07378	3.88914	3.89351
Cntn3	4	gene	199262482	199546616	-	6	ensembl	protein_coding	1.37586	1.95072	1.49332	0.772239	0.96525	1.63279	1.41447	1.64687	1.48121	1.18068	1.32037	0.990843	2.02543	1.43689	0.972175	1.12623	1.66659	1.2967	1.68741	1.39075
Gnal	18	gene	62036103	62131420	+	6	ensembl	protein_coding	4.43519	5.47703	4.99902	3.96737	4.10787	4.82711	5.26402	5.37701	4.84061	4.80156	4.84343	5.09426	4.97518	5.06053	3.9634	3.93262	4.96184	5.16029	5.15673	4.94854
Eif2ak1	12	gene	14792378	14825317	-	6	ensembl	protein_coding	5.2699	5.3972	5.25384	4.33981	4.15723	5.23553	5.37592	5.36176	5.23607	5.51821	5.269	5.41369	5.36395	5.25968	4.48152	4.19653	5.22164	5.36904	5.33824	5.2322
Dusp2	3	gene	126303199	126305373	+	5	ensembl	protein_coding	0.903545	0.566862	1.53999	0.175627	0.408438	0.984327	1.26624	1.28025	1.25662	1.43028	0.937589	1.33641	0.507448	1.6322	0.262936	0.523236	0.926094	1.17435	1.28695	1.22497
Dazap1	7	gene	12460102	12480849	-	4	ensembl	protein_coding	4.41471	4.3174	4.54714	3.19436	3.6518	4.54502	4.67733	4.77133	4.66288	4.87568	4.4209	4.8344	4.23103	4.54525	3.26908	3.79023	4.47987	4.63013	4.77189	4.68485
Rergl	4	gene	237872435	237881842	-	6	ensembl	protein_coding	-4.2242	-6.44475	-6.44475	-6.44475	-6.44475	-6.44475	-4.19108	-4.14515	-6.44475	-6.44475	-4.16452	-7.09859	-7.09859	-7.09859	-7.09859	-3.9915	-7.09859	-4.18343	-4.92965	-4.91163
Rgs7	13	gene	97560710	97772203	-	5	ensembl	protein_coding	5.50055	5.94432	5.53986	4.51018	4.81061	5.53946	5.53107	5.7248	5.64878	5.81028	5.46904	5.71693	5.99433	5.5259	4.63959	4.9176	5.54469	5.43727	5.69834	5.61621
Bod1	10	gene	16152118	16158451	+	4	ensembl	protein_coding	4.1647	4.36484	4.19181	3.16773	3.44436	4.16456	4.45586	4.39553	4.20036	4.69334	4.14682	4.61465	4.32967	4.20807	3.30809	3.57017	4.03128	4.43466	4.39982	4.19985
Tmx4	3	gene	134016679	134057338	-	5	ensembl	protein_coding	6.74639	6.98443	6.54544	5.6609	5.64583	6.69033	6.74733	6.73126	6.57033	6.74391	6.77075	6.6278	7.01265	6.52523	5.80914	5.70433	6.70156	6.69878	6.68562	6.53029
Lamtor2	2	gene	207313930	207317305	-	5	ensembl	protein_coding	5.8881	5.95398	5.88177	4.90888	4.89456	5.89525	6.14027	6.20801	6.04863	6.46641	5.84723	6.38675	5.90774	5.8931	5.0389	4.96648	5.91492	6.10056	6.20117	6.02902
Olr796	3	gene	109840190	109841125	+	1	ensembl	protein_coding	-6.69977	-6.69977	-6.69977	-6.69977	-6.69977	-6.69977	-6.69977	-6.69977	-6.69977	-6.69977	-6.89168	-6.89168	-6.89168	-6.89168	-6.89168	-6.89168	-4.97258	-6.89168	-6.89168	-6.89168
Rpap3	7	gene	139359860	139386634	-	6	ensembl	protein_coding	4.28908	4.34991	4.3115	2.99941	3.43615	4.38451	4.34136	4.36177	4.33329	4.53864	4.27787	4.44874	4.23608	4.37261	3.10376	3.50218	4.45831	4.32595	4.32138	4.29875
Piezo1	19	gene	66014941	66075579	-	6	ensembl	protein_coding	3.18223	3.21252	3.65696	2.00419	2.4229	3.67661	3.99059	3.43688	3.5287	3.67808	3.51192	3.81069	3.08393	3.38516	2.05618	2.831	3.47193	3.55035	3.34558	3.74292
Sugp2	16	gene	20760491	20789858	-	4	ensembl	protein_coding	6.30505	6.44982	6.26181	5.14085	5.24859	6.38307	6.50866	6.4301	6.30746	6.32251	6.30987	6.19263	6.45364	6.26101	5.26549	5.31301	6.38686	6.4873	6.39729	6.29082
Usp9x	X	gene	11310179	11428084	-	6	ensembl	protein_coding	6.65096	6.84157	6.53584	5.38922	5.58673	6.7934	6.62587	6.54253	6.52651	6.62925	6.7106	6.4909	6.83661	6.51424	5.50627	5.69427	6.79634	6.56828	6.49451	6.50986
Mir3583	5	gene	154400859	154400948	+	1	ensembl	miRNA	-6.79052	-6.79052	-6.79052	-6.79052	-6.79052	-3.36195	-6.79052	-6.79052	-6.79052	-6.79052	-6.81675	-6.81675	-6.81675	-6.81675	-6.81675	-6.81675	-3.12583	-6.81675	-6.81675	-6.81675
Ogg1	4	gene	208580193	208586457	+	5	ensembl	protein_coding	2.28888	2.40886	2.10666	1.08784	1.4599	2.15479	2.51517	2.5993	2.21987	2.51105	2.2372	2.43596	2.39529	2.04531	1.21117	1.53837	2.19117	2.57249	2.60887	2.11649
Trim39	20	gene	4530743	4544598	+	6	ensembl	protein_coding	3.13131	3.45268	3.06177	2.29198	2.32698	3.20846	3.47895	3.4318	3.11776	3.44533	3.10132	3.34231	3.43866	3.03187	2.40632	2.43986	3.24198	3.48957	3.41179	3.04335
RGD1559909	5	gene	146614723	146615760	-	1	ensembl	protein_coding	5.61437	5.09379	5.77539	4.25953	4.57292	5.63868	5.7626	5.83177	5.77276	6.23761	5.59818	6.17873	4.96289	5.81418	4.38087	4.68059	5.61278	5.70127	5.84459	5.78535
Mbd3	7	gene	12349402	12356298	+	4	ensembl	protein_coding	6.48862	6.58596	6.76483	5.62388	5.77234	6.71419	6.95127	6.92278	6.77947	7.13282	6.45721	7.08941	6.54967	6.74766	5.76094	5.80678	6.72833	6.93327	6.91803	6.74485
Phf21b	7	gene	125370846	125438318	+	5	ensembl	protein_coding	0.890673	1.56662	1.79136	0.0838631	0.728016	1.19874	1.39667	1.8474	1.49847	1.1105	0.826339	1.02987	1.53016	1.79918	0.135193	1.01459	1.13984	1.26674	1.85682	1.51358
LOC499643	2	gene	197453279	197566926	+	4	ensembl	protein_coding	-4.17991	-3.90726	-3.27223	-6.33063	-4.20342	-2.84876	-6.33063	-4.10335	-4.10651	-2.80784	-4.92559	-2.93299	-4.68211	-3.98082	-7.14982	-4.76337	-3.15631	-4.9432	-2.04394	-3.51243
Rasip1	1	gene	102689553	102700426	+	6	ensembl	protein_coding	3.32551	3.0832	3.35539	1.98295	1.82505	3.2423	3.51067	3.26666	3.2629	3.52719	3.3428	3.42965	3.07275	3.34598	2.09169	1.86717	3.27051	3.50599	3.23171	3.22359
Prkd2	1	gene	80015015	80043543	+	4	ensembl	protein_coding	3.09326	2.90307	3.38897	2.07656	2.69876	3.22607	3.39508	3.28885	2.9326	3.30589	3.07067	3.20116	2.79343	3.43344	2.23518	2.88581	3.24705	3.34951	3.25744	2.83542
Snx13	6	gene	64112186	64212889	+	6	ensembl	protein_coding	3.63085	4.02518	3.71028	2.43282	2.79339	4.08374	3.90087	3.76896	3.88695	3.76311	3.60157	3.64627	4.03052	3.72415	2.53581	2.88592	4.10359	3.87125	3.69222	3.90485
Kptn	1	gene	79282539	79290168	+	5	ensembl	protein_coding	3.13546	3.07061	3.0313	2.22598	1.89472	2.71422	3.42342	3.44016	3.68123	3.63099	3.15596	3.49602	3.18982	3.04818	2.05581	2.11528	3.0695	3.38468	3.32221	3.41063
Mfge8	1	gene	141814240	141829651	-	7	ensembl	protein_coding	6.39584	6.49628	6.3256	5.50543	5.38426	6.2607	6.67394	6.62428	6.18561	6.73822	6.45916	6.60568	6.44079	6.30013	5.68498	5.46525	6.2059	6.63837	6.6389	6.15098
Eml4	6	gene	6573579	6629032	+	4	ensembl	protein_coding	4.78798	5.10613	4.89565	3.70492	4.07822	4.97253	4.97824	4.93625	4.77837	4.9812	4.76833	4.87729	5.11673	4.90596	3.82068	4.18791	4.98409	4.92412	4.90898	4.72541
Slc22a7	9	gene	15822368	15828166	+	6	ensembl	protein_coding	-2.62362	-3.54206	-5.70944	-5.70944	-5.70944	-3.04454	-1.79076	-2.54448	-2.21894	-1.57615	-3.15781	-2.41786	-3.17708	-3.85029	-5.42198	-4.41638	-3.95286	-2.19252	-3.10776	-2.77432
Resp18	9	gene	82240055	82246397	-	2	ensembl	protein_coding	5.28539	5.50792	5.30506	4.43712	4.32368	5.23378	5.30768	5.3745	5.31622	5.49839	5.30016	5.39781	5.47859	5.31557	4.62185	4.35242	5.2232	5.26213	5.35402	5.28398
Crygn	4	gene	6917315	6923284	+	6	ensembl	protein_coding	-6.64283	-6.64283	-4.39596	-6.64283	-6.64283	-6.64283	-6.64283	-6.64283	-3.61463	-4.43143	-4.70636	-4.7405	-6.93332	-4.60358	-6.93332	-6.93332	-6.93332	-6.93332	-6.93332	-3.29146
F2rl2	2	gene	45371780	45376928	+	2	ensembl	protein_coding	-2.86877	-1.819	-1.4254	-3.79917	-2.89654	-2.8367	-1.77223	-1.33547	-2.05433	-2.50711	-2.70178	-3.12527	-1.45708	-1.31451	-3.39443	-3.42884	-3.04971	-1.77378	-1.5462	-1.52313
Rps6ka4	1	gene	229077912	229088867	-	6	ensembl	protein_coding	4.72732	4.97174	4.95632	3.79568	4.01466	4.87738	5.1841	5.21568	4.84753	5.0426	4.6867	4.93752	4.94584	4.98012	3.91157	4.11528	4.87415	5.1583	5.2194	4.80414
Ptp4a3	7	gene	114918557	114924152	+	6	ensembl	protein_coding	5.10253	5.28981	5.36253	4.26241	4.34486	5.66877	5.76391	5.74148	5.60577	5.79046	5.04119	5.72122	5.21546	5.34376	4.38858	4.42243	5.71587	5.74479	5.73954	5.59969
Med8	5	gene	141030635	141031519	+	5	ensembl	protein_coding	1.64243	2.10617	1.42182	0.567977	0.819204	1.78957	1.53953	1.39609	1.60557	1.88573	1.61203	1.65767	2.26791	1.47324	0.790032	0.717504	1.77338	1.49112	1.32479	1.6664
Nfatc2	3	gene	171384481	171500358	-	6	ensembl	protein_coding	3.60334	2.90055	2.92614	1.38686	1.86633	3.13507	3.15656	3.30017	3.48584	3.28845	3.68505	3.15606	2.82117	2.89665	1.45155	1.99248	3.10744	3.1621	3.264	3.5128
Tox4	15	gene	32506570	32520158	+	6	ensembl	protein_coding	6.03466	6.15164	6.03925	4.94382	4.99115	6.0524	6.28283	6.15738	6.0839	6.24059	6.02251	6.15415	6.13284	6.04654	5.07273	5.05883	6.05648	6.26621	6.11212	6.0552
Arhgap39	7	gene	117776694	117869344	-	6	ensembl	protein_coding	6.86203	6.8704	6.74943	5.56232	5.96073	6.92969	7.15387	7.11589	6.82237	6.97505	6.86447	6.86345	6.8346	6.72979	5.66113	6.05739	6.93851	7.14274	7.11663	6.79308
Ubqln4	2	gene	207318101	207333300	+	5	ensembl	protein_coding	6.01046	6.0681	5.83112	4.74188	4.8102	5.9931	6.23247	6.04951	5.90057	6.14433	6.02846	6.04866	6.05909	5.81815	4.85901	4.86478	6.00075	6.21823	6.01699	5.86762
Mir296	3	gene	178408788	178408865	-	1	ensembl	miRNA	-6.81374	-6.81374	-6.81374	-6.81374	-6.81374	-6.81374	-6.81374	-6.81374	-6.81374	-6.81374	-6.81374	-6.81374	-6.81374	-6.81374	-6.81374	-6.81374	-6.81374	-6.81374	-6.81374	-6.81374
Spata7	6	gene	131817567	131862859	+	6	ensembl	protein_coding	2.94461	3.19119	2.84879	1.67387	1.94388	3.00544	3.00553	3.05805	2.8597	2.99572	2.95972	2.88594	3.17249	2.81131	1.7745	2.04929	2.98839	2.98084	3.03899	2.86531
Dph2	5	gene	140512447	140515407	-	6	ensembl	protein_coding	3.33582	3.26429	3.30196	2.08685	2.05262	3.51987	3.6396	3.52604	3.38746	3.60896	3.3711	3.5027	3.25467	3.29102	2.24697	2.02916	3.54221	3.61313	3.51997	3.35255
Phb2	4	gene	224248364	224252647	+	6	ensembl	protein_coding	5.73681	5.79324	5.73663	4.58706	4.63379	5.67773	5.89789	5.91601	5.71933	6.03274	5.78491	5.95526	5.67619	5.76705	4.6796	4.6289	5.66723	5.92057	5.93077	5.72075
Sntg2	6	gene	57803704	58004693	-	5	ensembl	protein_coding	0.992928	1.05536	0.827939	0.425597	0.124742	0.52922	0.23323	1.10532	1.14579	1.44065	0.959087	1.35675	0.97906	0.819764	0.561587	0.218392	0.524165	0.272902	1.08156	1.1075
Lrrc8e	12	gene	4710047	4721276	-	4	ensembl	protein_coding	-2.38572	-1.80992	-2.00276	-2.79797	-3.98132	0.0456833	-0.539699	-2.30047	-2.65128	-1.45792	-2.43785	-1.4317	-2.35145	-2.10018	-3.0208	-3.48089	0.0236754	-0.861588	-2.39273	-1.82786
Olr845	5	gene	73681775	73683243	-	1	ensembl	protein_coding	-6.7013	-6.7013	-6.7013	-6.7013	-6.7013	-6.7013	-6.7013	-6.7013	-6.7013	-6.7013	-4.99744	-6.89062	-6.89062	-6.89062	-6.89062	-6.89062	-6.89062	-6.89062	-6.89062	-6.89062
Asf1a	20	gene	36651864	36666710	+	5	ensembl	protein_coding	2.42814	2.70952	2.57496	1.27866	1.59243	2.66213	2.48198	2.49333	2.44768	2.61777	2.35821	2.59024	2.59845	2.58078	1.412	1.75737	2.69799	2.40335	2.43605	2.45215
Trip11	6	gene	134956635	135024177	-	6	ensembl	protein_coding	3.49168	3.78952	3.65249	1.98235	2.70129	3.92363	3.64115	3.40907	3.54347	3.32236	3.49932	3.17191	3.77573	3.68007	2.05631	2.81785	4.00246	3.59473	3.35658	3.50206
Msc	5	gene	3934953	3936298	+	5	ensembl	protein_coding	-3.24181	-6.10302	-3.92128	-4.07519	-6.10302	-2.08925	-2.71971	-6.10302	-3.16259	-2.68543	-2.74697	-3.36282	-7.45704	-2.87818	-4.93011	-4.96253	-2.48738	-3.34228	-5.09665	-2.94034
Cyp4f18	16	gene	19269139	19385552	+	4	ensembl	protein_coding	-2.5046	-2.55339	-3.18786	-2.89805	-5.94528	-1.81721	-2.20993	-1.94684	-1.46618	-1.77861	-2.29885	-3.26402	-2.87165	-2.70497	-4.04511	-3.44915	-1.65898	-1.28942	-2.50415	-2.22166
Add2	4	gene	182317207	182454565	+	5	ensembl	protein_coding	5.39432	5.79756	5.66884	4.44965	4.71607	5.55252	5.98551	5.78051	5.4882	5.56894	5.37109	5.37055	5.78159	5.64323	4.50621	4.92992	5.57879	5.99808	5.70977	5.51288
Dlgap5	15	gene	28108228	28138753	-	5	ensembl	protein_coding	-1.01557	-0.435211	-0.168701	-4.13437	-1.65888	-0.64035	-0.49193	-0.926067	-0.586268	0.132349	-1.11699	0.17065	-0.436028	-0.264698	-3.82646	-1.67386	-0.564865	-0.703971	-0.560201	-0.948575
Cd55	13	gene	52179638	52206115	-	6	ensembl	protein_coding	-0.323459	0.614759	0.33503	-1.6242	-0.965447	0.16823	-0.0106014	0.497301	0.42175	-0.312301	-0.518358	-0.703197	0.689792	0.261294	-1.3824	-0.515088	0.249415	-0.188441	0.587789	0.320257
Nedd8	15	gene	38230806	38242650	-	5	ensembl	protein_coding	6.42052	6.56934	6.29557	5.33349	5.52927	6.29744	6.49371	6.5609	6.5134	6.88568	6.41408	6.84055	6.55924	6.27427	5.46618	5.60849	6.27461	6.43487	6.53165	6.49539
Nt5c1b	6	gene	45851471	45868642	+	6	ensembl	protein_coding	-5.89602	-2.25093	-5.89602	-5.89602	-5.89602	-5.89602	-5.89602	-2.95596	-5.89602	-5.89602	-5.43169	-4.60177	-4.27946	-4.44213	-5.2293	-3.81963	-4.52621	-7.76136	-4.52216	-7.76136
Mt1	19	gene	11277133	11278149	-	4	ensembl	protein_coding	2.05542	2.83363	3.16251	1.63869	2.02661	3.70265	3.65631	2.96142	3.21705	3.92221	2.02071	3.90883	2.71475	3.1797	1.63012	2.12638	3.79781	3.71847	2.9211	3.15865
Ccdc93	13	gene	42558446	42626672	+	6	ensembl	protein_coding	2.93635	2.9981	3.01284	1.72	1.63501	3.1997	3.35516	2.89537	2.55328	2.94079	2.93415	2.8471	2.96266	3.01048	1.87156	1.68078	3.26145	3.35452	2.86889	2.45501
RGD1564149	20	gene	15085295	15096866	-	5	ensembl	protein_coding	0.539965	1.38393	1.69231	0.238252	0.211873	1.65969	1.66565	1.55014	1.6054	2.14274	0.0821537	2.22441	1.28855	1.8702	0.422148	0.336136	1.79408	1.76344	1.42226	1.48656
Echdc1	1	gene	32308393	32350239	-	5	ensembl	protein_coding	3.87288	4.20046	4.07831	3.00761	3.25601	4.5069	4.12068	4.0091	4.02598	4.46921	3.84775	4.39934	4.17904	4.09612	3.14707	3.33603	4.57403	4.06081	3.9117	3.99524
Nhlrc1	17	gene	19876653	19877843	-	2	ensembl	protein_coding	3.2906	3.17077	3.20627	1.8296	2.36363	3.32764	3.55705	3.377	3.30313	3.28082	3.26703	3.13877	3.12981	3.14247	1.91125	2.51164	3.38093	3.53105	3.37047	3.32309
RGD1359634	7	gene	120366954	120374272	-	4	ensembl	protein_coding	4.03681	4.34212	4.15541	3.03011	3.35273	4.25907	4.49962	4.3606	4.38967	4.43363	3.94596	4.3798	4.2989	4.137	3.19985	3.41374	4.28693	4.47779	4.34571	4.37408
Selenbp1	2	gene	215588507	215598468	+	5	ensembl	protein_coding	2.13691	2.71506	2.6509	1.64532	1.50347	2.5586	2.88239	2.74417	2.8624	2.90663	2.0567	2.81738	2.76376	2.69374	1.78189	1.52585	2.5185	2.86742	2.72457	2.85604
Trim28	1	gene	66355606	66362276	-	2	ensembl	protein_coding	6.7838	7.03198	6.98346	5.83973	5.8986	6.85568	7.16493	7.07743	6.88549	7.04805	6.7509	6.93235	7.01453	6.99723	5.96655	5.96968	6.85612	7.16882	7.05211	6.86086
Olr63	1	gene	174053616	174054569	+	3	ensembl	protein_coding	-6.39889	-6.39889	-6.39889	-6.39889	-6.39889	-6.39889	-6.39889	-6.39889	-6.39889	-4.00102	-7.13041	-4.37737	-7.13041	-7.13041	-7.13041	-7.13041	-5.07272	-7.13041	-5.06955	-4.28893
Uvssa	14	gene	83308371	83344207	-	5	ensembl	protein_coding	0.780407	0.786029	0.957339	-0.189271	0.0801513	0.902541	1.01893	0.98961	0.593461	1.15729	0.814288	1.01358	0.589495	1.04603	-0.219438	0.338035	0.780956	1.03603	1.08497	0.592551
Prss2	4	gene	135519121	135522183	+	1	ensembl	protein_coding	-6.42428	-6.42428	-6.42428	-6.42428	-6.42428	-6.42428	-4.09641	-4.04896	-6.42428	-6.42428	-4.27274	-7.1044	-7.1044	-4.94744	-7.1044	-7.1044	-7.1044	-3.45537	-4.23766	-7.1044
Hnrnpl	1	gene	88176711	88187394	+	7	ensembl	protein_coding	6.78992	7.06741	6.9626	5.81564	6.00565	6.89178	7.11781	7.14725	6.9605	7.22048	6.73359	7.13698	7.04035	6.95668	5.92163	6.14122	6.88924	7.07343	7.14384	6.9421
Rbm7	8	gene	51415941	51421071	-	6	ensembl	protein_coding	3.33376	3.70618	3.62019	2.13949	2.5981	3.52243	3.54558	3.69479	3.40099	3.80954	3.24884	3.76288	3.68641	3.62674	2.22536	2.76077	3.53373	3.5081	3.70329	3.31494
Slc38a2	7	gene	137716131	137728300	-	4	ensembl	protein_coding	5.81528	6.04379	5.57509	4.5787	4.87212	6.08762	5.9123	5.9502	5.44024	5.77795	5.8203	5.65342	6.05534	5.54415	4.71519	4.96662	6.15581	5.86992	5.92105	5.35148
Fkbp7	3	gene	70095653	70107822	-	6	ensembl	protein_coding	1.06633	1.32065	1.18492	0.501861	-0.576713	0.849479	1.10531	0.823741	1.01088	1.31311	1.11417	1.2127	1.31693	1.08934	0.762202	-0.666151	1.08814	1.0692	0.766743	0.846298
Tnfrsf19	15	gene	45064736	45127279	-	5	ensembl	protein_coding	3.17368	3.39164	3.5369	2.20136	2.34066	3.84726	4.0251	3.17865	3.41895	3.78608	3.12646	3.68905	3.39686	3.52222	2.33537	2.42765	3.92632	4.01028	3.05084	3.41521
Xrcc2	4	gene	5865957	5884492	+	6	ensembl	protein_coding	1.67523	1.77123	0.903132	-0.132159	0.488504	1.83838	1.69988	1.55883	1.16421	1.49318	1.7263	1.33559	1.81654	0.759989	-0.0531449	0.773815	1.85727	1.63945	1.52132	1.08331
Slc12a1	3	gene	123945415	124022076	+	7	ensembl	protein_coding	-6.15523	-6.15523	-6.15523	-6.15523	-6.15523	-6.15523	-3.8286	-6.15523	-6.15523	-3.79598	-5.26662	-3.69674	-3.75331	-7.32955	-5.0874	-7.32955	-7.32955	-5.28295	-4.46123	-7.32955
Abcd2	7	gene	131968473	132017044	-	3	ensembl	protein_coding	4.39013	4.5545	4.41477	3.25286	3.57099	4.37974	4.30828	4.43969	4.41415	4.62688	4.47495	4.55105	4.45999	4.41943	3.40594	3.61903	4.42716	4.24418	4.34504	4.40522
Kcnc3	1	gene	101659056	101673261	+	7	ensembl	protein_coding	8.35774	8.24158	8.30927	7.02634	7.46149	8.05226	8.41872	8.49118	8.37108	8.47068	8.37085	8.36771	8.21182	8.32253	7.10673	7.59919	7.99204	8.38807	8.47872	8.36268
Mmgt1	X	gene	153601506	153610102	-	5	ensembl	protein_coding	2.94302	3.16516	2.82433	1.8788	1.77724	2.98637	2.99366	2.92688	2.85099	3.14803	2.89499	2.629	3.08612	3.2919	2.14159	1.88958	3.23732	3.04028	2.56658	2.71709
Topors	5	gene	61098862	61110393	-	6	ensembl	protein_coding	3.61298	3.86297	3.72793	2.8707	3.0896	3.88117	3.94112	3.87575	3.75349	4.12987	3.58986	4.09739	3.81145	3.71588	3.00819	3.1872	3.89581	3.90494	3.84623	3.68862
Hdc	3	gene	125585493	125603283	-	5	ensembl	protein_coding	-1.21568	-0.784955	0.163871	-2.29168	-0.842216	-0.473671	-0.337284	0.38481	-0.287996	0.1216	-0.683164	0.0162848	-1.00773	0.0540164	-2.46666	-0.803565	-0.435698	-0.316762	0.194014	-0.113947
Igll1	11	gene	91443556	91446548	+	4	ensembl	protein_coding	-6.68932	-6.68932	-6.68932	-6.68932	-6.68932	-6.68932	-3.6846	-6.68932	-6.68932	-6.68932	-6.91354	-6.91354	-6.91354	-6.91354	-6.91354	-6.91354	-6.91354	-3.90502	-4.67514	-6.91354
Nup85	10	gene	104144379	104162637	-	6	ensembl	protein_coding	3.95535	4.03432	3.78752	2.81935	2.83781	3.93577	4.19035	3.88008	3.84042	4.05225	3.99089	3.95344	4.02787	3.7715	2.95741	2.89343	3.94948	4.1756	3.80724	3.80635
Ccdc28a	1	gene	15072111	15083325	-	6	ensembl	protein_coding	3.54864	3.38655	3.30939	2.3103	2.40542	3.23992	3.49965	3.58526	3.58156	3.77612	3.54768	3.83914	3.30257	3.32116	2.52037	2.47134	3.20587	3.37784	3.51382	3.54303
Oxgr1	15	gene	108806845	108807858	-	1	ensembl	protein_coding	-3.55969	-6.5765	-6.5765	-6.5765	-6.5765	-6.5765	-6.5765	-6.5765	-6.5765	-6.5765	-4.04468	-7.01166	-7.01166	-7.01166	-7.01166	-7.01166	-4.82176	-7.01166	-7.01166	-4.80017
Ptprj	3	gene	85950332	86099287	-	4	ensembl	protein_coding	5.99637	6.23647	6.09661	4.9272	5.07845	6.06536	6.18196	6.09041	5.99576	5.98662	6.1128	5.64992	6.26281	6.12968	5.13275	5.09191	6.19997	6.20513	5.96823	5.902
Olr1625	15	gene	30728504	30729433	-	2	ensembl	protein_coding	-6.57657	-6.57657	-6.57657	-6.57657	-6.57657	-6.57657	-6.57657	-6.57657	-6.57657	-6.57657	-5.08274	-6.97593	-4.8755	-6.97593	-6.97593	-6.97593	-6.97593	-6.97593	-6.97593	-6.97593
Pip5k1c	7	gene	11433956	11461658	-	6	ensembl	protein_coding	8.95051	8.66915	8.69683	7.46305	7.62556	8.67716	8.88631	8.87867	8.98102	9.01241	8.99588	8.90993	8.61724	8.70452	7.57677	7.69184	8.64731	8.8449	8.86137	8.99093
Depdc1b	2	gene	59075286	59147310	+	5	ensembl	protein_coding	-1.54491	-6.01404	-1.43547	-2.10297	-2.5436	-1.65772	-1.50897	-1.76507	-1.21739	-0.768226	-1.27834	-0.989702	-4.89162	-1.72794	-2.25374	-2.29639	-1.83013	-1.72884	-2.22886	-1.3328
Ash2l	16	gene	70676024	70697836	+	6	ensembl	protein_coding	4.50447	4.82157	4.67456	3.60615	3.56851	4.75068	4.76688	4.62729	4.49581	4.83213	4.41048	4.75112	4.82892	4.65005	3.72053	3.74352	4.75218	4.7457	4.62171	4.42384
Cox8c	6	gene	135972917	135974240	+	1	ensembl	protein_coding	-6.58888	-6.58888	-6.58888	-6.58888	-6.58888	-6.58888	-6.58888	-6.58888	-6.58888	-6.58888	-6.96751	-5.10334	-6.96751	-6.96751	-6.96751	-6.96751	-6.96751	-6.96751	-5.04545	-6.96751
Rogdi	10	gene	9528490	9533108	+	5	ensembl	protein_coding	7.32821	7.37133	7.34395	6.28508	6.45758	7.0642	7.38501	7.52138	7.45741	7.65114	7.32627	7.58149	7.33342	7.35781	6.4113	6.55188	7.01268	7.32895	7.51211	7.44939
Rnf145	10	gene	30002561	30040956	+	6	ensembl	protein_coding	5.7591	6.13601	5.86801	4.75781	4.86372	5.95003	6.10482	5.99444	5.77553	6.05586	5.73962	5.96252	6.15398	5.87481	4.87075	4.93357	5.97067	6.07105	5.96113	5.72724
Mme	2	gene	173197265	173275026	+	5	ensembl	protein_coding	-0.462747	-0.340267	-0.625567	-1.99369	-0.941607	-1.7124	-0.488605	-0.0819571	-0.822923	-1.66977	-0.342688	-1.9403	-0.300898	-0.338034	-1.84886	-0.810371	-1.86022	-0.625126	-0.0291812	-1.04384
Gng11	4	gene	28897478	28902917	+	1	ensembl	protein_coding	0.941891	1.20086	0.588664	0.10774	-0.151171	1.41091	1.27867	1.09312	0.722764	1.33936	0.913452	1.43799	1.17013	0.517799	-0.0485413	0.0833277	1.31494	1.32887	0.831212	0.983604
Maoa	X	gene	7373361	7439125	-	6	ensembl	protein_coding	4.95569	5.09928	4.86279	3.66062	3.65118	4.97302	4.97317	4.8209	4.91234	5.10708	4.96464	5.03273	5.0764	4.87213	3.80158	3.67349	5.02117	4.91172	4.78128	4.88092
Lmod2	4	gene	51329520	51337212	+	1	ensembl	protein_coding	-5.66356	-3.25273	-5.66356	-5.66356	-5.66356	-5.66356	-5.66356	-5.66356	-5.66356	-3.46161	-4.84954	-3.98126	-5.44077	-4.20467	-5.49138	-7.92613	-4.81532	-4.86937	-4.81142	-5.63294
Mrpl13	7	gene	95910454	95932053	-	5	ensembl	protein_coding	4.57225	4.67847	4.35237	3.37663	3.35618	4.35553	4.41221	4.49384	4.54392	4.82378	4.58153	4.79103	4.72731	4.33566	3.52076	3.39942	4.33966	4.30294	4.47193	4.49496
Gata2	4	gene	185375167	185383942	+	2	ensembl	protein_coding	1.50325	0.966534	1.55428	0.336481	0.417788	1.71645	1.70811	1.459	1.41897	1.82723	1.50654	1.75758	0.969229	1.47976	0.447376	0.406934	1.77194	1.6922	1.38818	1.48835
Pafah1b3	1	gene	83427896	83430421	-	3	ensembl	protein_coding	2.38889	2.51537	2.65617	1.47908	1.27529	2.27854	2.30299	2.83868	2.39742	2.47995	2.45024	2.31591	2.49004	2.69086	1.64485	1.38276	2.26974	2.21439	2.86432	2.28926
Ppt2	20	gene	6460813	6469830	-	6	ensembl	protein_coding	4.08215	4.44385	4.47313	3.24423	3.52418	4.25063	4.81404	4.81509	4.55299	4.85516	3.98674	4.76899	4.40453	4.46783	3.36618	3.63556	4.21422	4.82433	4.82692	4.56014
Hmga2	7	gene	65375936	65490635	-	2	ensembl	protein_coding	-4.603	-4.603	-2.41021	-4.603	-4.603	-4.603	-4.603	-4.603	-4.603	-2.44482	-4.03071	-3.26714	-4.13958	-4.31251	-6.60675	-4.49789	-3.53352	-3.46926	-4.17874	-3.64292
Ehhadh	11	gene	86024803	86057811	+	4	ensembl	protein_coding	1.03463	1.5015	0.955249	-0.16971	0.956957	1.13033	0.859356	1.09089	1.0183	1.27609	0.992586	1.63252	1.06623	1.06515	0.294972	0.82918	1.40262	0.706533	0.81883	0.844973
Mir10a	10	gene	83968682	83968791	+	1	ensembl	miRNA	-6.689	-6.689	-6.689	-6.689	-6.689	-6.689	-6.689	-6.689	-6.689	-6.689	-6.89904	-6.89904	-4.79861	-6.89904	-6.89904	-6.89904	-6.89904	-6.89904	-6.89904	-6.89904
Sacm1l	8	gene	131759866	131816202	+	6	ensembl	protein_coding	4.18335	4.34273	4.11398	2.99903	3.32261	4.21814	4.1701	4.08308	4.00204	4.49772	4.18333	4.43021	4.34698	4.13866	3.11127	3.41331	4.24243	4.0916	4.02524	3.94974
Lage3	1	gene	152095511	152096934	+	2	ensembl	protein_coding	5.12972	5.17181	5.00318	3.89172	4.24897	5.03976	5.33818	5.26521	5.18566	5.58488	5.13834	5.54604	5.13488	4.98104	4.00304	4.34125	5.00117	5.30929	5.24665	5.15741
Wbp2	10	gene	103647548	103654798	+	6	ensembl	protein_coding	8.0357	8.00515	7.98588	6.67151	7.05481	7.92345	8.16418	8.27701	8.17765	8.347	8.05352	8.26332	7.96025	7.98169	6.76853	7.11131	7.90598	8.13231	8.27953	8.1859
RGD1562310	12	gene	45753578	45773812	-	4	ensembl	protein_coding	3.84459	3.89067	3.74338	2.61549	2.81557	3.95244	4.2001	4.02864	3.64264	3.9771	3.83611	3.87242	3.90204	3.72461	2.72796	2.85098	3.99013	4.21784	4.00794	3.58059
Slc17a4	17	gene	45316866	45323260	+	5	ensembl	protein_coding	-4.44201	-4.19358	-2.33728	-3.32209	-4.46343	-3.68672	-6.40165	-3.17728	-4.37513	-3.65083	-4.69874	-4.73885	-3.40466	-2.51742	-3.46964	-4.50792	-3.68179	-4.71945	-4.65885	-3.65266
Rnf112	10	gene	47491745	47497296	-	5	ensembl	protein_coding	8.25515	8.16181	8.08156	6.93364	7.03889	7.85556	8.07214	8.24014	8.07999	8.20497	8.29089	8.09988	8.15746	8.09365	7.05932	7.10569	7.8216	8.01256	8.22477	8.058
Pax4	4	gene	55483131	55488075	-	6	ensembl	protein_coding	-1.92532	-2.32627	-2.00798	-3.54542	-3.50512	-1.19458	-1.71534	-2.90559	-2.26932	-1.67919	-1.97816	-1.43679	-2.66318	-2.04021	-3.1242	-3.71028	-0.934791	-2.00062	-2.60461	-2.5813
Zbtb6	3	gene	26919902	26923316	-	4	ensembl	protein_coding	1.54484	2.22087	2.19799	0.882046	0.82294	2.24349	2.22049	2.02873	1.82297	1.96468	1.48302	1.82499	2.18366	2.27532	1.06486	0.880156	2.26775	2.18015	1.94515	1.84399
Prom2	3	gene	127225845	127239960	+	6	ensembl	protein_coding	-2.74134	-3.71041	-1.78786	-4.02476	-2.76713	-2.3656	-1.35654	-2.31085	-2.66128	-3.14829	-2.45598	-3.00425	-3.39969	-2.11764	-4.04252	-2.74788	-2.91921	-1.53888	-2.0303	-2.61773
Lamp5	3	gene	135507575	135519611	+	6	ensembl	protein_coding	6.23823	6.08455	5.85919	4.91792	4.58603	5.61776	5.68245	5.87544	6.35558	6.24179	6.29258	6.1657	6.07296	5.84672	5.09401	4.63266	5.5676	5.58001	5.81436	6.39237
Adamts1	11	gene	28965542	28974878	-	6	ensembl	protein_coding	1.48253	1.7494	2.75664	0.341661	0.95193	2.64316	2.86491	1.7524	2.1391	2.62542	1.46256	2.57315	1.54438	2.78911	0.423756	1.31286	2.62814	2.84693	1.59162	2.13462
Tyr	1	gene	157322968	157416594	-	4	ensembl	protein_coding	-1.21137	-0.758869	-0.26587	-1.5645	-1.31523	-0.748386	-0.413395	-0.105795	-0.538085	-0.482423	-1.12304	-0.269613	-0.853541	-0.722741	-1.77436	-0.656177	0.338524	0.167473	-1.4464	-1.06406
Slc50a1	2	gene	207998463	208000843	-	5	ensembl	protein_coding	2.22715	2.31222	2.3329	1.44316	1.24992	2.46312	2.37538	2.40092	2.30398	2.76373	2.17979	2.71472	2.24345	2.29873	1.54752	1.38207	2.48906	2.34485	2.38637	2.28595
Gatad2b	2	gene	209087998	209163193	+	5	ensembl	protein_coding	4.15421	4.4741	4.16446	3.21027	3.36185	4.25653	4.54561	4.40319	4.0377	4.12007	4.14308	3.96498	4.49017	4.16241	3.35479	3.46063	4.26469	4.54048	4.3636	3.98315
Glra1	10	gene	40687417	40720140	-	6	ensembl	protein_coding	-2.61971	-2.31995	-2.51063	-3.03168	-2.99098	-2.5893	-2.9301	-2.03569	-3.36106	-1.54468	-3.01328	-1.68769	-3.12448	-2.88071	-2.76511	-2.80456	-2.97379	-2.20498	-2.36782	-2.11136
Rapgef6	10	gene	39648119	39812677	+	6	ensembl	protein_coding	3.6401	3.75652	3.61464	2.38686	2.43149	3.75507	3.64979	3.44289	3.55338	3.6078	3.65639	3.4788	3.73747	3.63358	2.50026	2.49916	3.79968	3.59127	3.38479	3.55714
Fam222b	10	gene	66217748	66283043	-	4	ensembl	protein_coding	5.33607	5.39704	5.24026	4.13267	4.51265	5.22976	5.47653	5.3781	5.3358	5.50659	5.34131	5.40934	5.36957	5.24362	4.24219	4.6073	5.22052	5.45031	5.33457	5.32674
Nrarp	3	gene	2377426	2379972	+	4	ensembl	protein_coding	3.20355	2.96463	2.51107	1.85034	1.86854	2.27071	2.95561	3.26509	2.84105	2.94191	3.31237	2.82292	2.94274	2.44897	2.01427	2.01388	2.12778	2.92873	3.25101	2.80983
Tph2	7	gene	58053270	58157948	-	4	ensembl	protein_coding	-1.85565	-0.304331	-0.0766043	-1.12659	-0.894708	0.204684	-0.385766	-0.102482	-0.160124	-0.0175971	-1.95165	-0.0703106	-0.38589	-0.0478601	-0.895928	-0.739761	0.437711	-0.643773	-0.136467	-0.285244
Necab2	19	gene	62834865	62861089	+	6	ensembl	protein_coding	7.16767	6.92166	7.04598	6.04998	5.92037	7.12267	7.3253	7.27012	7.18509	7.4416	7.15605	7.38037	6.83704	7.0397	6.21393	5.9723	7.11459	7.30773	7.2495	7.17922
Tgif2	3	gene	158772767	158787955	-	1	ensembl	protein_coding	0.110881	0.906149	0.968572	-0.221799	-0.652598	0.710255	1.11207	0.706839	0.796411	0.842301	-0.144069	0.931281	0.923981	0.912163	-0.106461	-0.607672	0.679889	1.0429	0.625208	1.02186
Sdr16c5	5	gene	21681674	21703750	-	5	ensembl	protein_coding	-6.31468	-6.31468	-6.31468	-6.31468	-6.31468	-3.27987	-6.31468	-4.04617	-4.0494	-6.31468	-4.24455	-5.08878	-3.98133	-7.22731	-7.22731	-7.22731	-3.3279	-7.22731	-5.02237	-5.00406
Ssr1	17	gene	29410635	29426436	+	6	ensembl	protein_coding	4.65143	4.94445	4.65124	3.5801	3.76216	4.92654	4.86305	4.63738	4.72787	4.80638	4.66224	4.69578	4.96445	4.63857	3.71027	3.83598	4.96394	4.81349	4.55168	4.71419
Ifnar1	11	gene	35248575	35272229	+	5	ensembl	protein_coding	5.00428	5.25372	5.02687	3.99956	3.99158	5.216	5.3359	5.1686	5.01219	5.23765	4.9693	5.11807	5.24625	5.03819	4.1423	4.09318	5.23211	5.28453	5.13442	4.98799
Catsperd	9	gene	9387396	9424456	-	1	ensembl	protein_coding	-0.9228	-0.73252	-0.414921	-1.24653	-1.07064	-1.01158	-0.409428	0.049446	-0.141847	-0.0887296	-0.507822	-0.166992	-0.779095	-0.368658	-1.42716	-0.96929	-0.522343	-0.834721	-0.0314521	-0.382002
Nop16	17	gene	12685785	12690719	+	6	ensembl	protein_coding	4.60361	4.73687	4.44614	3.455	3.53502	4.47031	4.68294	4.66228	4.41495	4.85237	4.60986	4.79207	4.74989	4.42337	3.61906	3.59193	4.46377	4.64131	4.62134	4.34688
Gpr132	6	gene	146648352	146660012	-	3	ensembl	protein_coding	-0.873899	-1.89464	-1.59901	-3.02698	-5.63288	-2.93833	-0.838165	-1.27846	-1.44194	-1.02491	-1.07359	-1.41373	-2.16818	-1.4354	-3.37759	-3.88133	-2.69497	-0.931268	-1.94008	-1.63308
Chrna3	8	gene	58175886	58189161	-	4	ensembl	protein_coding	-0.870779	-0.76962	-0.970357	-4.02104	-2.3899	-1.17581	-1.30502	-3.88941	-2.0019	-1.01184	-1.13931	-0.941879	-0.737495	-1.0045	-3.98944	-2.24346	-0.78314	-1.56199	-3.62129	-2.38319
Gas2	1	gene	108304939	108405240	+	5	ensembl	protein_coding	1.33155	1.45625	1.21745	0.215322	0.632629	1.00398	1.31572	1.4206	0.961683	1.62748	1.4018	1.57663	1.40809	1.2143	0.440307	0.812755	0.985391	1.20849	1.34662	0.788283
Dusp22	17	gene	38367181	38417679	+	5	ensembl	protein_coding	2.6533	2.79862	2.65938	1.63855	1.47851	3.10948	2.85695	3.01694	2.76847	3.17177	2.67015	3.06738	2.73447	2.68392	1.76138	1.53867	3.14981	2.83492	2.96129	2.74998
Flt4	10	gene	34850707	34892141	+	7	ensembl	protein_coding	0.611858	0.566706	0.59473	-0.477376	-1.03401	0.797553	1.01608	1.01989	0.564941	0.62174	0.948523	0.407456	0.764191	0.518237	-0.352435	-1.16091	0.647254	0.948668	0.945195	0.615928
Fam69b	3	gene	9442976	9450728	+	5	ensembl	protein_coding	6.11653	5.85224	5.81146	4.87596	4.8432	5.64061	6.00127	6.032	5.88161	6.2593	6.16309	6.19082	5.82603	5.79008	5.00242	4.92957	5.57984	5.95665	6.00531	5.87037
Pigw	10	gene	72101788	72103296	-	3	ensembl	protein_coding	1.12577	1.42455	1.30427	-0.0762299	0.590597	1.56977	1.26527	0.98799	1.49584	1.71528	1.14052	1.65091	1.37036	1.30018	-0.0066451	0.659223	1.64196	1.22471	0.944117	1.47777
Tmem56	2	gene	242813588	242867287	-	3	ensembl	protein_coding	2.44395	2.48987	2.3695	1.0038	1.61029	2.71287	2.42642	2.34408	2.05911	2.44836	2.47313	2.33609	2.5636	2.59043	1.2089	1.57801	2.65088	2.2936	2.19133	2.02229
Ctsl	17	gene	1861404	1867575	-	5	ensembl	protein_coding	5.50333	5.87859	5.77733	4.74503	4.70669	5.93428	5.98212	5.80074	5.68921	6.09937	5.46127	6.023	5.85843	5.79042	4.893	4.75596	5.98081	5.95498	5.75715	5.6417
Ugt2b7	14	gene	22548026	22561553	+	3	ensembl_havana	processed_transcript	-6.58562	-6.58562	-6.58562	-6.58562	-6.58562	-6.58562	-6.58562	-6.58562	-6.58562	-6.58562	-6.96974	-6.96974	-6.96974	-6.96974	-6.96974	-6.96974	-5.05064	-6.96974	-5.04768	-6.96974
Arx	X	gene	62957562	62969948	+	5	ensembl_havana	protein_coding	3.37364	3.17647	3.22584	2.05234	2.13854	3.21447	3.47121	3.35027	2.86476	3.52666	3.40784	3.50579	3.09193	3.22818	2.13877	2.2647	3.16691	3.44809	3.28309	2.85892
Syn1	X	gene	2136354	2193641	+	6	ensembl	protein_coding	9.0189	8.84447	8.8915	7.61461	7.83891	8.74662	8.90397	9.03016	9.16915	9.19599	9.05793	9.12104	8.68067	8.96157	7.62482	7.86521	8.78674	8.89491	9.03268	9.22872
Afg3l1	19	gene	66982824	67009036	+	5	ensembl	protein_coding	3.95011	4.2226	4.15962	2.92685	3.01895	4.41663	4.47351	4.22306	4.2859	4.41	3.89279	4.33584	4.20087	4.16466	3.06298	3.04929	4.4508	4.4401	4.18882	4.30109
Uts2	5	gene	171655843	171661230	+	3	ensembl	protein_coding	-6.4688	-3.97614	-6.4688	-6.4688	-6.4688	-6.4688	-4.22359	-6.4688	-6.4688	-4.19211	-4.93262	-4.96552	-3.35846	-7.07851	-7.07851	-7.07851	-7.07851	-4.94961	-7.07851	-4.07468
Lgals8	17	gene	68233213	68257626	-	6	ensembl	protein_coding	4.10256	4.24451	4.02795	2.83551	3.03342	4.08987	4.27306	4.04913	4.05678	4.30915	4.09643	4.18377	4.24464	4.00287	3.00073	3.08877	4.10647	4.24589	4.07372	3.97865
Pomk	16	gene	70523618	70533991	+	6	ensembl	protein_coding	5.33869	5.48096	5.18496	4.13739	4.25037	5.27975	5.42956	5.38699	5.20279	5.43214	5.35795	5.32518	5.43571	5.19869	4.27142	4.2638	5.31859	5.40333	5.36238	5.18655
Mmadhc	3	gene	40897290	40915185	-	6	ensembl	protein_coding	4.26917	4.56681	4.07391	3.11578	3.35402	4.33085	4.22783	4.28529	4.13668	4.57205	4.26834	4.49375	4.56946	4.0508	3.21133	3.4453	4.37067	4.1614	4.2519	4.10944
Tekt5	10	gene	4175003	4211706	+	3	ensembl	protein_coding	1.9776	1.77943	1.48896	0.339074	0.420505	1.23239	1.42798	1.38961	1.84487	2.12957	2.06341	2.13236	1.68329	1.5368	0.490857	0.489773	1.20103	1.26109	1.26925	1.90211
Ift74	5	gene	117537609	117629815	+	5	ensembl	protein_coding	2.12913	2.20357	2.1837	0.631478	1.58075	2.64391	2.34879	2.17931	2.45053	2.91912	2.14408	2.89072	2.13504	2.17479	0.685827	1.7147	2.68689	2.29299	2.1075	2.43773
Zfp523	20	gene	9964697	9985907	+	5	ensembl	protein_coding	5.8144	5.70286	5.8908	4.77341	4.9093	5.83505	6.15952	6.15246	5.99126	6.26709	5.80232	6.19876	5.62592	5.88815	4.89688	4.98083	5.82935	6.14084	6.14786	5.98526
Galt	5	gene	62669071	62672295	+	5	ensembl	protein_coding	2.7111	3.01565	3.1726	1.95895	1.99156	2.97564	3.12116	3.51265	3.01854	3.61707	2.63907	3.55559	2.97346	3.16799	2.12428	2.04341	2.93539	3.07659	3.51599	3.06313
Oat	1	gene	211555927	211575708	-	5	ensembl	protein_coding	5.68987	5.78821	5.69092	4.58338	4.56628	5.7892	5.90031	5.6975	5.54966	6.04614	5.70213	5.9871	5.77342	5.68278	4.71129	4.61167	5.80867	5.8821	5.65061	5.49171
Abcg1	20	gene	11971328	12020646	+	3	ensembl	protein_coding	5.91642	6.08163	5.98187	4.93712	5.10457	6.1385	6.39562	6.17259	6.06501	6.14341	5.8972	6.02422	6.05979	5.97157	5.07493	5.18278	6.15449	6.39731	6.13558	6.03888
Dync2li1	6	gene	7837943	7869291	+	6	ensembl	protein_coding	3.15675	3.69542	3.43645	2.54462	2.14809	3.41464	3.39424	3.4772	3.5199	3.82542	3.11272	3.78589	3.73034	3.46305	2.67362	2.26701	3.40919	3.30329	3.3893	3.47831
Gtf2f1	9	gene	9033678	9043039	+	1	ensembl	protein_coding	5.54512	5.87009	5.77909	4.74115	5.09045	5.85397	5.98447	6.01409	5.79829	6.21787	5.48388	6.15134	5.84855	5.78054	4.85466	5.20618	5.85217	5.95204	5.98662	5.7786
Ubald1	10	gene	9656418	9660397	+	1	ensembl	protein_coding	6.30496	6.11081	6.36586	5.0854	5.37454	6.07742	6.61676	6.65127	6.58931	6.75527	6.18772	6.68375	5.9217	6.49313	5.18982	5.49699	5.96555	6.65455	6.71361	6.6248
Gpatch11	6	gene	1401794	1411973	+	4	ensembl	protein_coding	3.38948	3.63227	3.29677	2.23636	2.60249	3.60173	3.4781	3.58319	3.35998	3.68409	3.40856	3.5913	3.649	3.26748	2.34672	2.67165	3.63867	3.41258	3.51132	3.36718
Inpp5b	5	gene	146503106	146566949	+	1	ensembl	protein_coding	4.06793	4.35454	4.16281	3.07003	3.18646	4.40648	4.42163	4.22455	4.10081	4.25337	4.05819	4.09745	4.34257	4.25478	3.21169	3.31512	4.36464	4.4008	4.12982	4.07355
LOC100271845	1	gene	203724528	203726928	+	2	ensembl	protein_coding	-2.2523	-2.80544	-5.98223	-5.98223	-5.98223	-5.98223	-3.06471	-5.98223	-5.98223	-5.98223	-3.2251	-5.36183	-2.9274	-5.22051	-7.62497	-7.62497	-5.29514	-3.55724	-3.88876	-5.27216
Spry3	12	gene	20930800	20931768	+	4	ensembl	protein_coding	1.59531	1.42843	1.77837	0.296295	0.808334	1.78724	1.93497	1.846	1.35778	1.40864	1.49265	1.47718	1.18945	1.74987	0.346872	1.03576	1.82971	2.04494	1.72827	1.34668
RGD1559896	19	gene	68101910	68127030	-	4	ensembl	protein_coding	6.9924	7.14811	7.27645	5.97619	6.04972	7.32076	7.67167	7.30046	7.26377	7.54122	6.94624	7.46466	7.0988	7.28744	6.09468	6.10995	7.33982	7.6868	7.25774	7.25461
[truncated: 13,810 more rows]
